# Supplementary material for: DELAY OF GERMINATION 1, the Master Regulator of Seed Dormancy, Integrates the Regulatory Network of Phytohormones at the Transcriptional Level to Control Seed Dormancy
Source: Curr Issues Mol Biol. 2022 Dec 8;44(12):6205–17. doi: 10.3390/cimb44120423 (PMC9777134; doi:10.3390/cimb44120423)
Supplement: Supplementary file 1 [file cimb-44-00423-s001.zip]

Archive with 4 entries (4 files):
- Supplementary Figures.pdf
- Table S1. All DEGs list.xls
- Table S2. The Hormone-related genes list.xls
- Table S3. Primers used for RT-qPCR.xls
