# Supplementary material for: DELAY OF GERMINATION 1, the Master Regulator of Seed Dormancy, Integrates the Regulatory Network of Phytohormones at the Transcriptional Level to Control Seed Dormancy
Source: Curr Issues Mol Biol. 2022 Dec 8;44(12):6205–17. doi: 10.3390/cimb44120423 (PMC9777134; doi:10.3390/cimb44120423)
Supplement: Supplementary file 1 [file cimb-44-00423-s001.zip › Table S1. All DEGs list.xls]

## Sheet: DEGs in dry seeds
	baseMean	log2FoldChange	lfcSE	stat	pvalue	padj	DS_Col_1	DS_Col_2	DS_Col_3	DS_dog1-2_1	DS_dog1-2_2	DS_dog1-2_3	TAIR	SYMBOL	TAIR	GENENAME
AT1G43780	548.56	8.41035	1.28444	6.54787	5.83649e-11	1.64438e-09	0	0	0	92.096	35.1011	130.18	AT1G43780	scpl44	AT1G43780	NA
AT2G35370	44.882	8.31681	1.38542	6.00311	1.9357e-09	4.11423e-08	0	0	0	32.9726	91.0434	117.261	AT2G35370	GDCH	AT2G35370	Encodes glycine decarboxylase complex H protein. Involved in photorespiration.
AT3G01680	44.0772	7.91433	1.31076	6.03799	1.5605e-09	3.3813e-08	0	0	0	36.3836	40.5856	105.336	AT3G01680	AtSEOR1, SEOb, SEOR1	AT3G01680	NA
AT1G70830	50.8112	7.72829	1.65847	4.65989	3.16377e-06	3.11298e-05	0	1.2672	0	26.1507	162.342	124.217	AT1G70830	MLP28	AT1G70830	NA
AT1G66270	86.8531	7.48046	2.22149	3.36732	0.00075902	0.00372868	0	1.2672	1.37454	32.9726	136.017	309.052	AT1G66270	BGLU21	AT1G66270	NA
AT3G16450	22.3481	7.474	2.50797	2.98009	0.0028816	0.0113939	0	0	0	12.5069	83.365	38.7557	AT3G16450	JAL33	AT3G16450	NA
AT5G26260	64.1322	7.29863	2.36715	3.0833	0.00204717	0.0085163	0	1.2672	0	10.2329	66.9114	155.023	AT5G26260	NA	AT5G26260	NA
AT4G29920	38.3554	7.21257	1.24165	5.80886	6.29007e-09	1.19613e-07	0	0	0	31.8357	27.4227	52.6681	AT4G29920	AtHSPR, SMXL4	AT4G29920	NA
AT1G66280	22.7301	7.00706	2.0069	3.49148	0.000480355	0.00250201	0	0	0	6.82193	21.9382	68.5679	AT1G66280	BGLU22	AT1G66280	NA
AT5G15230	57.7673	6.95396	1.41978	4.89791	9.68591e-07	1.08093e-05	0	1.2672	1.37454	84.1371	108.594	143.098	AT5G15230	GASA4	AT5G15230	gibberellin-regulated (GASA4)
AT1G55200	150.448	6.94884	1.36626	5.08604	3.65617e-07	4.54031e-06	0	0	0	12.5069	12.066	68.5679	AT1G55200	NA	AT1G55200	NA
AT2G16850	35.3423	6.75373	1.35192	4.99565	5.86387e-07	6.93389e-06	0	0	0	21.6028	13.1629	46.7056	AT2G16850	PIP2;8, PIP3B	AT2G16850	NA
AT5G59130	206.364	6.60465	1.11054	5.94723	2.72713e-09	5.58324e-08	0	1.2672	1.37454	40.9316	58.1361	165.954	AT5G59130	NA	AT5G59130	NA
AT1G06360	57.2603	6.58846	1.67678	3.92923	8.52182e-05	0.000558362	0	0	0	9.0959	10.9691	52.6681	AT1G06360	NA	AT1G06360	NA
AT5G45670	234.657	6.54115	1.44315	4.53256	5.8273e-06	5.35519e-05	0	1.2672	0	26.1507	17.5505	93.4113	AT5G45670	NA	AT5G45670	NA
AT3G09260	1971.68	6.53579	1.21759	5.36781	7.96988e-08	1.16855e-06	0	69.696	16.4945	850.467	1974.43	5194.26	AT3G09260	BGLU23, LEB, PSR3.1, PYK10	AT3G09260	Encodes beta-glucosidase.The major constituent of ER bodies. One of the most abundant proteins in Arabidopsis seedlings. Exist in an soluble (inactive) and non-soluble (active) form, most probably formed in a polymerization process. Involved in the mutualistic interaction between Arabidopsis and the endophytic fungus Piriformospora indica.
AT2G14610	33.382	6.47981	1.1651	5.5616	2.67318e-08	4.39169e-07	1.48346	0	1.37454	36.3836	89.9465	119.248	AT2G14610	AtCAPE9, ATPR1, PR, PR1	AT2G14610	PR1 gene expression is induced in response to a variety of pathogens. It is a useful molecular marker for the SAR response. Though the Genbank record for the cDNA associated to this gene is called 'PR-1-like', the sequence actually corresponds to PR1. Expression of this gene is salicylic-acid responsive.
AT2G45050	35.618	6.47166	1.29767	4.98712	6.12847e-07	7.22122e-06	0	1.2672	0	14.7808	47.1671	68.5679	AT2G45050	GATA2	AT2G45050	Encodes a member of the GATA factor family of zinc finger transcription factors.
AT4G33145	19.3776	6.46581	1.34699	4.80019	1.58516e-06	1.67482e-05	0	1.2672	0	28.4247	24.132	77.5115	AT4G33145	NA	AT4G33145	NA
AT4G12390	26.836	6.40257	1.28865	4.96843	6.74973e-07	7.8654e-06	0	0	0	13.6439	14.2598	35.7745	AT4G12390	PME1	AT4G12390	NA
AT3G16460	191.044	6.34641	1.17448	5.40359	6.53194e-08	9.78473e-07	0	6.336	4.12362	62.5343	229.254	572.393	AT3G16460	JAL34	AT3G16460	NA
AT5G38420	93.4767	6.32059	1.53439	4.11929	3.8004e-05	0.000278404	0	0	0	7.95892	18.6474	33.7871	AT5G38420	DEG24, RBCS2B	AT5G38420	NA
AT3G30720	14.5905	6.31848	1.3257	4.76614	1.87789e-06	1.95322e-05	0	0	0	12.5069	21.9382	25.8372	AT3G30720	DEG6, QQS	AT3G30720	NA
AT1G21310	136.276	6.28972	1.18346	5.3147	1.06835e-07	1.5165e-06	0	5.0688	2.74908	71.6302	159.052	393.52	AT1G21310	ATEXT3, EXT3, RSH	AT1G21310	Encodes extensin 3.
AT1G44760	17.8355	6.28953	1.40279	4.48358	7.34013e-06	6.5212e-05	0	0	0	13.6439	6.58145	38.7557	AT1G44760	NA	AT1G44760	NA
AT5G46690	37.2262	6.26494	1.06846	5.86351	4.53186e-09	8.88768e-08	0	3.8016	0	37.5206	86.6557	185.829	AT5G46690	bHLH071	AT5G46690	NA
AT1G73850	17.5136	6.24572	1.37329	4.54799	5.41601e-06	5.03876e-05	0	0	0	17.0548	4.38763	35.7745	AT1G73850	NA	AT1G73850	NA
AT4G15160	58.3978	6.21731	1.70112	3.65484	0.000257344	0.00146532	0	0	0	0	16.4536	39.7495	AT4G15160	PAC2	AT4G15160	NA
AT1G20020	16.1096	6.08668	1.62811	3.7385	0.00018512	0.00109742	0	0	0	2.27398	14.2598	34.7808	AT1G20020	ATLFNR2, FNR2, LFNR2	AT1G20020	Encodes a leaf-type ferredoxin:NADP(H) oxidoreductase. It is present in both chloroplast stroma and thylakoid membranes but is more abundant in the stroma
AT4G23590	7.56549	6.03055	1.81267	3.32689	0.000878224	0.00419301	0	0	0	4.54795	12.066	32.7933	AT4G23590	NA	AT4G23590	NA
AT1G20010	147.803	5.91143	1.0917	5.41487	6.13337e-08	9.24294e-07	0	2.5344	0	28.4247	51.5547	83.4739	AT1G20010	TUB5	AT1G20010	beta tubulin
AT2G22170	150.169	5.88075	1.12821	5.21246	1.86348e-07	2.49164e-06	0	2.5344	1.37454	23.8767	62.5238	152.042	AT2G22170	PLAT2	AT2G22170	NA
AT5G60200	71.8904	5.85965	1.10694	5.29357	1.1995e-07	1.68358e-06	0	1.2672	1.37454	31.8357	42.7794	83.4739	AT5G60200	DOF5.3, TMO6	AT5G60200	Encodes a Dof-type transcription factor.
AT5G38520	9.39799	5.82443	1.37113	4.24792	2.15766e-05	0.000169725	0	0	0	13.6439	15.3567	13.9123	AT5G38520	CLD1	AT5G38520	NA
AT1G78060	324.373	5.78649	0.768072	7.53379	4.92897e-14	2.31361e-12	0	11.4048	1.37454	145.534	148.083	438.238	AT1G78060	NA	AT1G78060	NA
AT4G30290	647.801	5.72979	0.910407	6.29365	3.10078e-10	7.52407e-09	1.48346	1.2672	1.37454	45.4795	39.4887	132.167	AT4G30290	ATXTH19, XTH19	AT4G30290	Encodes a xyloglucan endotransglucosylase/hydrolase with only only the endotransglucosylase (XET; EC 2.4.1.207) activity towards xyloglucan and non-detectable endohydrolytic (XEH; EC 3.2.1.151) activity. Expressed throughout both the main and the lateral root, with intensive expression at the dividing and elongating regions. Is expressed in lateral root primordia but expression ceases after later…
AT5G62940	27.8014	5.70117	1.26714	4.49924	6.81954e-06	6.12658e-05	0	0	0	13.6439	7.67836	17.8873	AT5G62940	DOF5.6, HCA2	AT5G62940	HCA2 induces the formation of interfascicular cambium and regulates vascular tissue development in the aerial parts of the plant. Evidence from both gain of function and dominant negative alleles.
AT1G78370	176.612	5.69933	0.519705	10.9665	5.53918e-28	1.33761e-25	5.93385	7.6032	5.49816	222.85	234.738	535.624	AT1G78370	ATGSTU20, GSTU20	AT1G78370	Encodes glutathione transferase belonging to the tau class of GSTs. Naming convention according to Wagner et al. (2002).
AT1G75780	19.1168	5.69041	1.37423	4.14081	3.46082e-05	0.000257085	0	0	0	12.5069	6.58145	19.8747	AT1G75780	TUB1	AT1G75780	beta tubulin gene downregulated by phytochrome A (phyA)-mediated far-red light high-irradiance and the phytochrome B (phyB)-mediated red light high-irradiance responses
AT1G32080	6.30214	5.63169	1.46874	3.83436	0.000125893	0.000785089	0	0	0	17.0548	6.58145	13.9123	AT1G32080	AtLrgB, LrgB, PLGG, PLGG1	AT1G32080	NA
AT3G20395	15.3798	5.59332	1.42737	3.91862	8.90583e-05	0.000579168	0	0	0	6.82193	7.67836	21.8622	AT3G20395	ATL92	AT3G20395	NA
AT1G43800	127.319	5.5915	0.832429	6.71709	1.85394e-11	5.70791e-10	1.48346	3.8016	0	81.8631	84.4619	96.3925	AT1G43800	AAD6, FTM1, SAD6	AT1G43800	NA
AT1G28400	26.5145	5.57774	1.25433	4.44679	8.71643e-06	7.64232e-05	1.48346	0	0	22.7398	19.7443	27.8246	AT1G28400	NA	AT1G28400	NA
AT1G33475	4.38559	5.56008	1.44553	3.84639	0.00011987	0.000752211	0	0	0	14.7808	12.066	8.94363	AT1G33475	NA	AT1G33475	NA
AT4G00950	14.5543	5.55409	1.29983	4.27294	1.92915e-05	0.000153619	0	2.5344	0	10.2329	39.4887	76.5177	AT4G00950	MEE47	AT4G00950	NA
AT5G51560	53.478	5.51665	1.29811	4.24977	2.1399e-05	0.000168527	0	1.2672	0	12.5069	8.77527	45.7119	AT5G51560	NA	AT5G51560	NA
AT3G54920	115.19	5.50341	1.0925	5.03744	4.71802e-07	5.71314e-06	0	2.5344	0	22.7398	29.6165	70.5553	AT3G54920	PMR6	AT3G54920	Powdery mildew resistant mutant encodes a pectate lyase-like protein
AT4G22217	3.59614	5.50008	2.00312	2.74576	0.00603703	0.0210435	0	0	0	2.27398	12.066	19.8747	AT4G22217	NA	AT4G22217	Encodes a defensin-like (DEFL) family protein.
AT2G05330	25.3255	5.48087	0.959088	5.71467	1.09918e-08	1.98476e-07	1.48346	1.2672	1.37454	50.0275	42.7794	90.4301	AT2G05330	NA	AT2G05330	NA
AT4G33220	95.2741	5.45846	1.283	4.25445	2.09566e-05	0.0001656	0	0	0	2.27398	5.48454	24.8434	AT4G33220	ATPME44, PME44	AT4G33220	NA
AT5G25830	7.19704	5.44271	1.49984	3.62885	0.000284685	0.00160175	0	0	0	2.27398	6.58145	23.8497	AT5G25830	GATA12	AT5G25830	Encodes a member of the GATA factor family of zinc finger transcription factors.
AT2G38540	103.889	5.39995	0.994336	5.4307	5.6132e-08	8.53607e-07	7.41732	2.5344	0	47.7535	129.435	235.516	AT2G38540	ATLTP1, AtLtpI-4, LP1, LTP1	AT2G38540	Non-specific lipid transfer protein. Binds calmodulin in a Ca2+-independent manner. Localized to the cell wall. Specifically expressed in L1 epidermal layer. Predicted to be a member of PR-14 pathogenesis-related protein family with the following members: At2g38540/LTP1, At2g38530/LTP2, At5g59320/LTP3, At5g59310/LTP4, At3g51600/LTP5, At3g08770/LTP6, At2g15050/LTP7, At2g18370/LTP8, At2g15325/LTP9,…
AT3G20210	216.668	5.39912	0.755778	7.14379	9.07933e-13	3.58222e-11	16.3181	5.0688	6.8727	133.028	214.994	832.752	AT3G20210	AEP4, DELTA-VPE, DELTAVPE	AT3G20210	Encodes a vacuolar processing enzyme with caspase-1-like activity that is specifically expressed in inner integument of developing seeds. Mutants display abnormal seed coat development. It is speculated to be involved in cell death of limited cell layers, the purpose of which is to form a seed coat.
AT5G51750	299.894	5.3984	0.794931	6.79103	1.11337e-11	3.59924e-10	1.48346	16.4736	4.12362	109.151	231.448	607.173	AT5G51750	ATSBT1.3, SBT1.3	AT5G51750	NA
AT5G56960	2.96285	5.38719	2.15867	2.4956	0.0125744	0.0384797	0	0	0	0	19.7443	11.9248	AT5G56960	NA	AT5G56960	NA
AT5G43870	9.39567	5.37845	1.36023	3.95409	7.68273e-05	0.000511408	0	0	0	9.0959	3.29072	18.881	AT5G43870	FL1	AT5G43870	NA
AT5G01075	24.4362	5.37803	1.2752	4.21742	2.47119e-05	0.0001905	1.48346	0	0	20.4658	8.77527	31.7996	AT5G01075	TWS1	AT5G01075	NA
AT1G32470	24.2059	5.36895	1.45041	3.70169	0.000214172	0.00125553	0	2.5344	0	5.68494	34.0042	70.5553	AT1G32470	NA	AT1G32470	NA
AT3G12170	9.92292	5.33567	1.50753	3.53935	0.000401116	0.0021525	0	0	0	3.41096	13.1629	13.9123	AT3G12170	NA	AT3G12170	NA
AT5G13140	21.3373	5.33311	1.25084	4.26362	2.01139e-05	0.000159851	0	0	2.74908	13.6439	46.0701	50.6806	AT5G13140	NA	AT5G13140	NA
AT2G18500	5.89549	5.29384	1.43699	3.68399	0.000229613	0.00133048	0	0	0	10.2329	5.48454	13.9123	AT2G18500	ATOFP7, OFP7	AT2G18500	NA
AT3G09730	16.8331	5.29164	1.28571	4.11574	3.85944e-05	0.000281905	0	0	0	9.0959	4.38763	15.8998	AT3G09730	NA	AT3G09730	NA
AT2G46630	11.7452	5.27898	1.65947	3.18114	0.00146699	0.00645415	0	0	0	2.27398	1.09691	25.8372	AT2G46630	NA	AT2G46630	NA
AT5G47380	14.6013	5.23756	1.28905	4.06311	4.84225e-05	0.000342945	0	0	0	5.68494	7.67836	14.9061	AT5G47380	NA	AT5G47380	NA
AT1G27660	25.3819	5.20756	1.25103	4.16263	3.14607e-05	0.000236256	0	0	1.37454	20.4658	12.066	21.8622	AT1G27660	NA	AT1G27660	NA
AT3G52630	13.527	5.20664	1.53628	3.38913	0.000701137	0.00348617	0	0	0	6.82193	1.09691	19.8747	AT3G52630	RPA3A	AT3G52630	NA
AT4G00480	138.861	5.19003	1.05136	4.93649	7.95429e-07	9.0687e-06	0	0	2.74908	22.7398	30.7134	45.7119	AT4G00480	ATMYC1, myc1	AT4G00480	MYC-related protein with a basic helix-loop-helix motif at the C-terminus and a region similar to the maize B/R family at the N-terminus
AT1G33080	10.4544	5.18668	1.3291	3.9024	9.5245e-05	0.000613822	0	0	0	6.82193	7.67836	12.9186	AT1G33080	NA	AT1G33080	NA
AT3G01670	38.5235	5.18287	1.5426	3.35982	0.000779936	0.00380768	0	6.336	0	19.3288	18.6474	197.754	AT3G01670	AtSEOR2, SEOa, SEOR2	AT3G01670	NA
AT2G19660	9.84858	5.17318	1.36391	3.7929	0.000148901	0.000910995	0	0	0	3.41096	8.77527	14.9061	AT2G19660	NA	AT2G19660	NA
AT4G30860	9.82394	5.15996	1.47149	3.50661	0.000453846	0.0023894	0	0	0	3.41096	6.58145	16.8935	AT4G30860	ASHR3, SDG4	AT4G30860	Encodes a member of the trxG protein family. Contains a SET domain which is known to be involved in modification of histone tails by methylation. Interacts physically with AMS, but the implications of this interaction are unknown.Overexpression results in plieotrophic developmental defects.
AT1G33800	46.0675	5.1474	1.36407	3.77355	0.000160941	0.000974247	0	0	0	4.54795	0	21.8622	AT1G33800	AtGXMT1, GXM3, GXMT1	AT1G33800	NA
AT1G04680	14.4819	5.14	1.4221	3.61438	0.000301068	0.00167853	0	0	1.37454	6.82193	25.2289	19.8747	AT1G04680	NA	AT1G04680	NA
AT4G28410	7.80311	5.13432	1.45318	3.53316	0.000410624	0.0021947	0	0	1.37454	6.82193	10.9691	33.7871	AT4G28410	RSA1	AT4G28410	NA
AT3G28770	4.28735	5.12302	1.49203	3.43359	0.000595654	0.0030332	0	0	0	9.0959	3.29072	13.9123	AT3G28770	NA	AT3G28770	NA
AT2G23050	34.2054	5.10191	1.45569	3.50482	0.000456923	0.00240177	0	0	1.37454	2.27398	3.29072	44.7182	AT2G23050	MEL4, NPY4	AT2G23050	A member of the NPY gene family (NPY1/AT4G31820, NPY2/AT2G14820, NPY3/AT5G67440, NPY4/AT2G23050, NPY5/AT4G37590). Involved in auxin-mediated organogenesis.
AT3G44990	562.708	5.09284	0.940094	5.41737	6.04813e-08	9.14199e-07	0	1.2672	4.12362	65.9453	19.7443	100.367	AT3G44990	AtXTH31, ATXTR8, XTH31, XTR8	AT3G44990	xyloglucan endo-transglycosylase
AT3G15950	456.983	5.08861	0.931542	5.46257	4.69296e-08	7.28591e-07	4.45039	41.8176	8.24724	217.165	363.077	1285.9	AT3G15950	NAI2	AT3G15950	Similar to TSK-associating protein 1 (TSA1), contains 10 EFE repeats, a novel repeat sequence unique to plants. Expressed preferentially in the roots.Protein is localized to ER bodies- an endoplasmic reticulum derived structure. Loss of function mutations lack ER bodies.
AT4G03050	125.31	5.0485	0.676753	7.45988	8.6604e-14	3.90035e-12	2.96693	3.8016	1.37454	54.5754	92.1403	124.217	AT4G03050	AOP3	AT4G03050	Transcriptional silent in leaf tissues of ecotype Col. The transcribed allele in ecotype Ler encodes a 2-oxoglutarate-dependent dioxygenase which is involved in glucosinolate biosynthesis. The natural variation in this locus explains the diversification of hydroxyalkyl glucosinolates among different ecotypes of Arabidopsis.
AT5G48060	12.2618	5.04512	1.47762	3.41435	0.00063934	0.00322372	0	0	0	1.13699	8.77527	14.9061	AT5G48060	MCTP2	AT5G48060	NA
AT3G23740	33.1058	5.04119	1.34796	3.73985	0.000184127	0.00109282	0	0	0	4.54795	1.09691	18.881	AT3G23740	NA	AT3G23740	NA
AT2G46850	6.05018	5.03771	1.593	3.1624	0.00156473	0.00681335	0	0	0	4.54795	3.29072	16.8935	AT2G46850	NA	AT2G46850	NA
AT1G33750	129.688	5.03115	0.825821	6.09229	1.11304e-09	2.47324e-08	0	3.8016	2.74908	29.5617	38.3918	153.035	AT1G33750	TPS22	AT1G33750	NA
AT5G01240	21.9763	5.0279	1.2706	3.95712	7.58589e-05	0.000505802	0	1.2672	0	21.6028	6.58145	19.8747	AT5G01240	LAX1	AT5G01240	Encodes LAX1 (LIKE AUXIN RESISTANT), a member of the AUX1 LAX family of auxin influx carriers. Required for the establishment of embryonic root cell organization.
AT4G17190	40.2906	5.00811	1.27677	3.92248	8.76432e-05	0.000570891	0	1.2672	0	5.68494	17.5505	23.8497	AT4G17190	FPS2	AT4G17190	Encodes a protein with farnesyl diphosphate synthase activity, which catalyzes the rate limiting step in isoprenoid biosynthesis. Its mRNA is most abundantly expressed in flowers.
AT5G13630	43.3436	4.99599	1.31734	3.79248	0.000149152	0.000912256	0	0	0	6.82193	1.09691	15.8998	AT5G13630	ABAR, CCH, CCH1, CHLH, GUN5	AT5G13630	Encodes magnesium chelatase involved in plastid-to-nucleus signal transduction.
AT2G42570	45.9759	4.99468	1.00943	4.94801	7.49773e-07	8.62174e-06	4.45039	0	0	19.3288	42.7794	70.5553	AT2G42570	TBL39	AT2G42570	Encodes a member of the TBL (TRICHOME BIREFRINGENCE-LIKE) gene family containing a plant-specific DUF231 (domain of unknown function) domain. TBL gene family has 46 members, two of which (TBR/AT5G06700 and TBL3/AT5G01360) have been shown to be involved in the synthesis and deposition of secondary wall cellulose, presumably by influencing the esterification state of pectic polymers. A nomenclature…
AT2G32550	5.88661	4.98385	1.38032	3.61065	0.000305436	0.00169957	0	0	0	11.3699	8.77527	3.97495	AT2G32550	NOT9c	AT2G32550	NA
AT1G25425	5.51531	4.95187	1.80491	2.74355	0.00607782	0.0211489	0	0	0	1.13699	3.29072	18.881	AT1G25425	CLE43	AT1G25425	NA
AT2G30370	33.5243	4.94507	1.36615	3.61973	0.000294915	0.00165065	0	0	1.37454	2.27398	10.9691	31.7996	AT2G30370	AtEPFL6, CHAL, EPFL6	AT2G30370	Encodes a small, potentially secreted protein that acts as an inhibitor of stomatal production though likely not through direct interaction with the TMM receptor. It is homologous to known stomatal regulators EPF1 and EPF2.
AT5G38410	373.315	4.93355	0.694163	7.10719	1.18428e-12	4.53661e-11	13.3512	3.8016	5.49816	134.165	131.629	416.376	AT5G38410	RBCS3B	AT5G38410	NA
AT3G26120	3.55838	4.92615	1.63781	3.00777	0.00263169	0.0105832	0	0	0	13.6439	5.48454	3.97495	AT3G26120	TEL1	AT3G26120	Similar to terminal ear1 in Zea mays. A member of mei2-like gene family; phylogenetic analysis revealed that TEL1 belongs to the third clade of mei2-like proteins (TEL clade), with conserved two N-terminal RNA recognition motifs (RRM), in addition to the C-terminal RRM, shared among all mei2-like proteins.
AT2G18450	4.37182	4.89878	1.55723	3.14584	0.00165613	0.00713845	0	0	0	2.27398	15.3567	4.96869	AT2G18450	SDH1-2	AT2G18450	Nuclear encoded mitochondrial flavoprotein subunit of succinate dehydrogenase complex .
AT5G15960	14.7503	4.89326	1.39403	3.51015	0.000447848	0.00236465	0	1.2672	0	13.6439	14.2598	15.8998	AT5G15960	KIN1	AT5G15960	cold and ABA inducible protein kin1, possibly functions as an anti-freeze protein. Transcript level of this gene is induced by cold, ABA, dehydration and osmoticum (mannitol). However, protein activity of GUS fused to the promoter of this gene is inhibited by cold treatment, suggesting an inhibition of the protein by increased transcript level.
AT5G23820	79.9456	4.88314	1.13735	4.29345	1.75917e-05	0.000141582	4.45039	7.6032	0	57.9864	82.2681	217.628	AT5G23820	ML3	AT5G23820	NA
AT4G08690	11.6882	4.86132	1.47978	3.28516	0.00101925	0.00474758	0	0	1.37454	3.41096	4.38763	34.7808	AT4G08690	NA	AT4G08690	NA
AT5G63990	9.39884	4.85207	1.49481	3.24594	0.00117065	0.00535083	0	0	0	0	8.77527	12.9186	AT5G63990	NA	AT5G63990	NA
AT5G18660	34.3021	4.84922	1.14512	4.23467	2.28886e-05	0.000178504	4.45039	0	0	13.6439	23.0351	84.4676	AT5G18660	DVR, PCB2	AT5G18660	Encodes a protein with 3,8-divinyl protochlorophyllide a 8-vinyl reductase activity. Mutants accumulate divinyl chlorophyll rather than monovinyl chlorophyll.
AT1G71970	13.2518	4.83039	1.33502	3.61823	0.000296625	0.00165744	0	0	0	11.3699	3.29072	6.95616	AT1G71970	NA	AT1G71970	NA
AT3G48460	41.5321	4.82669	1.65281	2.9203	0.00349695	0.013325	0	0	0	1.13699	3.29072	16.8935	AT3G48460	SFAR4	AT3G48460	NA
AT3G51710	2.58867	4.81505	1.73868	2.76937	0.0056164	0.0198186	0	0	0	2.27398	12.066	6.95616	AT3G51710	NA	AT3G51710	NA
AT4G31330	107.58	4.81073	1.07687	4.46733	7.92008e-06	6.99172e-05	2.96693	0	0	17.0548	18.6474	40.7432	AT4G31330	NA	AT4G31330	NA
AT1G29050	25.5867	4.79415	0.88141	5.43919	5.3524e-08	8.18917e-07	1.48346	5.0688	0	19.3288	73.4928	94.405	AT1G29050	TBL38	AT1G29050	Encodes a member of the TBL (TRICHOME BIREFRINGENCE-LIKE) gene family containing a plant-specific DUF231 (domain of unknown function) domain. TBL gene family has 46 members, two of which (TBR/AT5G06700 and TBL3/AT5G01360) have been shown to be involved in the synthesis and deposition of secondary wall cellulose, presumably by influencing the esterification state of pectic polymers. A nomenclature…
AT3G60870	43.8869	4.79198	1.28862	3.71868	0.000200265	0.00117952	0	0	0	0	5.48454	14.9061	AT3G60870	AHL18	AT3G60870	Encodes an AT hook domain containing protein that, when overexpressed, delays flowering.
AT1G69160	8.96395	4.7883	1.4464	3.31051	0.000931268	0.00439669	0	0	0	1.13699	7.67836	11.9248	AT1G69160	BGL1	AT1G69160	NA
AT5G51850	22.6131	4.78489	1.40883	3.39635	0.000682909	0.0034091	0	0	1.37454	12.5069	1.09691	26.8309	AT5G51850	TRM24	AT5G51850	NA
AT4G02060	102.034	4.77846	0.904395	5.2836	1.26668e-07	1.76429e-06	0	5.0688	0	21.6028	27.4227	98.38	AT4G02060	MCM7, PRL	AT4G02060	Member of the minichromosome maintenance complex, involved in DNA replication initiation. Abundant in proliferating and endocycling tissues. Localized in the nucleus during G1, S and G2 phases of the cell cycle, and are released into the cytoplasmic compartment during mitosis. Binds chromatin.
AT4G33560	12.6755	4.76193	1.44504	3.29536	0.00098295	0.00459988	0	0	0	7.95892	7.67836	4.96869	AT4G33560	WIP5	AT4G33560	NA
AT5G49660	9.15878	4.75962	1.31008	3.63308	0.000280054	0.00157894	0	0	1.37454	20.4658	7.67836	11.9248	AT5G49660	CEPR1, XIP1	AT5G49660	NA
AT3G12090	6.94554	4.7548	1.32673	3.58384	0.000338574	0.00185386	0	1.2672	0	14.7808	13.1629	11.9248	AT3G12090	TET6	AT3G12090	Member of TETRASPANIN family
AT1G28290	299.16	4.73072	0.80647	5.86596	4.46553e-09	8.79201e-08	5.93385	24.0768	5.49816	103.466	165.633	681.704	AT1G28290	AGP31	AT1G28290	Encodes an atypical arabinogalactan protein that is localized to the plasma membrange. AGP31 is highly expressed in flowers and vascular tissue and is repressed by jasmonic acid. AGP31 may play a role in vascular tissue function during defense and development.
AT2G27010	6.58266	4.72852	1.485	3.1842	0.00145156	0.00639561	0	0	0	7.95892	1.09691	10.9311	AT2G27010	CYP705A9	AT2G27010	member of CYP705A
AT1G71880	120.804	4.71188	0.892526	5.27926	1.29709e-07	1.80163e-06	0	1.2672	4.12362	26.1507	23.0351	93.4113	AT1G71880	ATSUC1, SUC1	AT1G71880	Sucrose transporter gene induced in response to nematodes; member of Sucrose-proton symporter family.
AT5G26290	30.7342	4.70903	0.958851	4.91112	9.05578e-07	1.01912e-05	1.48346	3.8016	0	23.8767	36.198	81.4864	AT5G26290	RAMGaP	AT5G26290	NA
AT1G28110	29.5171	4.69564	1.37367	3.41832	0.000630082	0.00318344	0	0	0	0	3.29072	15.8998	AT1G28110	SCPL45	AT1G28110	NA
AT2G40400	74.8964	4.69461	1.24201	3.77986	0.000156917	0.000954213	0	0	1.37454	7.95892	9.87217	19.8747	AT2G40400	BPG3, RER5	AT2G40400	NA
AT5G05290	3589.09	4.6807	0.693882	6.74567	1.52323e-11	4.7778e-10	13.3512	49.4208	21.9926	306.987	400.371	1475.7	AT5G05290	ATEXP2, ATEXPA2, ATHEXP, EXP2, EXPA2	AT5G05290	Encodes an expansin. Naming convention from the Expansin Working Group (Kende et al, 2004. Plant Mol Bio)
AT1G68810	18.5649	4.68014	1.33874	3.49594	0.000472403	0.00246894	0	0	0	4.54795	10.9691	3.97495	AT1G68810	ABS5, T5L1	AT1G68810	NA
AT4G20270	214.045	4.67972	0.53104	8.81237	1.22526e-18	1.16942e-16	5.93385	1.2672	5.49816	79.5892	88.8496	147.073	AT4G20270	BAM3	AT4G20270	Encodes a CLAVATA1-related receptor kinase-like protein required for both shoot and flower meristem function. It has a broad expression pattern and is involved in vascular strand development in the leaf, control of leaf shape, size and symmetry, male gametophyte development and ovule specification and function.
AT3G20370	109.144	4.66754	1.14784	4.06636	4.77539e-05	0.000339288	0	5.0688	0	26.1507	34.0042	74.5303	AT3G20370	NA	AT3G20370	NA
AT1G66620	17.3836	4.6633	1.35527	3.44087	0.000579853	0.00296177	0	0	1.37454	5.68494	5.48454	25.8372	AT1G66620	NA	AT1G66620	NA
AT5G02260	2088.74	4.66158	0.840966	5.54312	2.97132e-08	4.8144e-07	2.96693	12.672	1.37454	64.8083	65.8145	307.065	AT5G02260	ATEXP9, ATEXPA9, ATHEXP, EXP9, EXPA9	AT5G02260	member of Alpha-Expansin Gene Family. Naming convention from the Expansin Working Group (Kende et al, 2004. Plant Mol Bio)
AT1G78670	54.5132	4.6587	1.03103	4.51848	6.22851e-06	5.67663e-05	0	2.5344	1.37454	7.95892	19.7443	74.5303	AT1G78670	ATGGH3, GGH3	AT1G78670	NA
AT1G53070	87.0251	4.65296	1.07509	4.32799	1.50477e-05	0.000123455	2.96693	0	0	17.0548	20.8413	30.8058	AT1G53070	NA	AT1G53070	NA
AT5G50300	9.73666	4.65107	1.41545	3.28592	0.0010165	0.00473698	0	0	0	2.27398	7.67836	8.94363	AT5G50300	ATAZG2, AZG2	AT5G50300	Encodes a homolog of the adenine-guanine-hypoxanthine transporter AzgA of Aspergillus nidulans. Function as a plant adenine-guanine transporter. Two closely related genes exist in Arabidopsis: AT3G10960 (Azg1) and AT5G50300 (Azg2).
AT2G06925	68.8075	4.64862	0.898145	5.1758	2.2694e-07	2.9517e-06	1.48346	0	2.74908	22.7398	23.0351	56.643	AT2G06925	ATSPLA2-ALPHA, PLA2-ALPHA	AT2G06925	Encodes a secretory phospholipase A2 enzyme, which specifically hydrolyzes the sn-2 position of phospholipids. The enzyme has a preference towards linoleoyl acyl chain over palmitoyl acyl chain. It also has a slight preference for phosphatidylcholine over phosphatidylethanolamine.
AT1G74880	12.2508	4.64517	1.29713	3.5811	0.000342146	0.00187162	0	1.2672	1.37454	14.7808	26.3258	26.8309	AT1G74880	NDH-O, NdhO	AT1G74880	Encodes subunit NDH-O of NAD(P)H:plastoquinone dehydrogenase complex (Ndh complex) present in the thylakoid membrane of chloroplasts. This subunit is thought to be required for Ndh complex assembly.
AT5G56320	7.14292	4.63632	1.53393	3.0225	0.00250692	0.0101508	0	0	0	5.68494	1.09691	11.9248	AT5G56320	ATEXP14, ATEXPA14, ATHEXP, EXP14, EXPA14	AT5G56320	member of Alpha-Expansin Gene Family. Naming convention from the Expansin Working Group (Kende et al, 2004. Plant Mol Bio)
AT1G58270	83.0287	4.63368	0.642635	7.21044	5.57696e-13	2.25816e-11	2.96693	2.5344	8.24724	61.3973	98.7217	179.866	AT1G58270	ZW9	AT1G58270	ZW9 mRNA, complete cds
AT2G38700	108.425	4.62046	0.716885	6.44519	1.15456e-10	3.03287e-09	0	6.336	1.37454	34.1096	53.7485	111.299	AT2G38700	AtMDD1, ATMVD1, MDD1, MVD1	AT2G38700	Encodes mevalonate diphosphate decarboxylase, the enzyme that catalyzes the synthesis of isopentenyl diphosphate, used in sterol and isoprenoid biosynthesis. The protein appears to form a homodimeric complex. Incidentally, it was shown that the Arabidopsis MVD protein could also interact with its yeast homolog to form a heterodimer.
AT5G56795	21.1482	4.62042	1.14146	4.04783	5.16954e-05	0.000363427	0	0	2.74908	18.1918	26.3258	22.856	AT5G56795	MT1B	AT5G56795	one of the five metallothioneins (MTs) genes identified in Arabidopsis. MTs are cysteine-rich proteins required for heavy metal tolerance. The MT1b gene, however, is indicated to be inactive.
AT2G23010	21.2079	4.61722	1.39044	3.32069	0.000897952	0.00427295	0	2.5344	0	5.68494	13.1629	46.7056	AT2G23010	SCPL9	AT2G23010	NA
AT3G19620	3.956	4.61439	1.50819	3.05956	0.00221661	0.00911147	0	1.2672	0	3.41096	19.7443	12.9186	AT3G19620	NA	AT3G19620	NA
AT5G46110	33.5376	4.6127	0.991066	4.65428	3.25108e-06	3.18327e-05	0	1.2672	5.49816	53.4384	42.7794	70.5553	AT5G46110	APE2, TPT	AT5G46110	mutant has Altered acclimation responses; Chloroplast Triose Phosphate Translocator
AT1G74670	3368.85	4.61238	0.605938	7.61197	2.69945e-14	1.3261e-12	4.45039	6.336	13.7454	103.466	134.92	362.714	AT1G74670	GASA6	AT1G74670	NA
AT2G39900	8.8849	4.59707	1.49012	3.08503	0.0020353	0.00847488	0	0	0	3.41096	10.9691	3.97495	AT2G39900	WLIM2a	AT2G39900	NA
AT5G66045	4.87643	4.59386	1.46227	3.14159	0.00168032	0.00721943	0	0	0	7.95892	4.38763	5.96242	AT5G66045	NA	AT5G66045	NA
AT3G14370	6.49678	4.59218	1.71712	2.67434	0.00748754	0.0252648	0	0	0	0	2.19382	15.8998	AT3G14370	WAG2	AT3G14370	The WAG2 and its homolog, WAG1 each encodes protein-serine/threonine kinase that are nearly 70% identical to PsPK3 protein. All three together with CsPK3 belong to PsPK3-type kinases. At the N-terminus, all four possess a serine/threonine-rich domain. They are closely related to Arabidopsis kinases PINOID. wag1/wag2 double mutants exhibit a pronounced wavy root phenotype when grown vertically on …
AT5G41880	41.2281	4.58435	1.2776	3.58824	0.000332912	0.0018271	0	1.2672	0	5.68494	19.7443	9.93737	AT5G41880	POLA3, POLA4	AT5G41880	NA
AT1G65340	16.1254	4.56887	1.4769	3.09355	0.00197775	0.00829116	0	0	0	4.54795	4.38763	8.94363	AT1G65340	CYP96A3	AT1G65340	member of CYP96A
AT1G69530	6083.01	4.55355	0.934007	4.87529	1.08651e-06	1.19588e-05	5.93385	31.68	2.74908	150.082	123.951	680.71	AT1G69530	AT-EXP1, ATEXP1, ATEXPA1, ATHEXP, EXP1, EXPA1	AT1G69530	Member of Alpha-Expansin Gene Family. Naming convention from the Expansin Working Group (Kende et al, Plant Mol Bio). Involved in the formation of nematode-induced syncytia in roots of Arabidopsis thaliana.
AT5G35940	9.30513	4.55054	1.76892	2.57249	0.0100969	0.0322249	0	0	0	4.54795	2.19382	10.9311	AT5G35940	NA	AT5G35940	NA
AT2G04025	2.29321	4.53771	1.76657	2.56866	0.0102092	0.0325006	0	0	0	2.27398	3.29072	11.9248	AT2G04025	GLV7, RGF3	AT2G04025	Encodes a root meristem growth factor (RGF). Belongs to a family of functionally redundant homologous peptides that are secreted, tyrosine-sulfated, and expressed mainly in the stem cell area and the innermost layer of central columella cells. RGFs are required for maintenance of the root stem cell niche and transit amplifying cell proliferation. Members of this family include: At5g60810 (RGF1), …
AT1G11580	587.438	4.523	0.693432	6.52263	6.90843e-11	1.92047e-09	5.93385	17.7408	23.3672	170.548	212.8	702.572	AT1G11580	ATPMEPCRA, PMEPCRA	AT1G11580	NA
AT2G35450	49.2206	4.5223	0.832345	5.4332	5.53533e-08	8.44327e-07	2.96693	0	2.74908	35.2466	26.3258	64.5929	AT2G35450	NA	AT2G35450	NA
AT1G14750	50.1971	4.51679	1.25094	3.61071	0.00030536	0.00169957	1.48346	0	0	2.27398	10.9691	19.8747	AT1G14750	SDS	AT1G14750	Encodes a meiotic cyclin-like protein, distinct from all other known Arabidopsis cyclins. It is not required for meiotic DSB formation but is necessary for meiotic DSB repair via the homologous chromosome.
AT5G48940	72.9318	4.49407	0.9665	4.64984	3.32194e-06	3.24132e-05	0	0	4.12362	9.0959	26.3258	56.643	AT5G48940	RGFR2, RGI2	AT5G48940	NA
AT4G13710	28.1522	4.49346	1.32076	3.40219	0.000668483	0.00334542	0	0	0	0	10.9691	5.96242	AT4G13710	NA	AT4G13710	NA
AT2G25990	3.29461	4.48787	1.61401	2.78057	0.00542634	0.0192906	1.48346	0	0	17.0548	13.1629	2.98121	AT2G25990	NA	AT2G25990	NA
AT2G16580	31.3509	4.48716	1.29825	3.45632	0.000547608	0.00281717	0	0	0	5.68494	1.09691	9.93737	AT2G16580	SAUR8	AT2G16580	NA
AT4G04640	224.03	4.48496	0.503884	8.90077	5.54616e-19	5.47594e-17	8.90078	11.4048	4.12362	115.973	115.175	317.996	AT4G04640	ATPC1	AT4G04640	One of two genes (with ATPC2) encoding the gamma subunit of Arabidopsis chloroplast ATP synthase.
AT3G51410	18.2589	4.479	1.3279	3.373	0.000743546	0.00366435	0	0	0	2.27398	4.38763	9.93737	AT3G51410	NA	AT3G51410	NA
AT3G26760	4.90505	4.47302	1.51566	2.95121	0.00316532	0.012294	0	0	0	2.27398	5.48454	8.94363	AT3G26760	NA	AT3G26760	NA
AT1G27930	72.8654	4.47142	1.24997	3.57722	0.000347266	0.0018955	0	0	1.37454	3.41096	8.77527	19.8747	AT1G27930	AGM1	AT1G27930	Function unknown. Interacts with eIF3.
AT5G22500	152.952	4.45789	0.965053	4.61932	3.84993e-06	3.70804e-05	4.45039	1.2672	1.37454	9.0959	41.6825	101.361	AT5G22500	FAR1	AT5G22500	Encodes a member of the eight-member gene family encoding alcohol-forming fatty acyl-CoA reductases (FARs) identified in Arabidopsis thaliana. Three of the FARs, FAR1 (At5g22500), FAR4 (At3g44540) and FAR5 (At3g44550), are shown to generate the fatty alcohols found in root, seed coat, and wound-induced leaf tissue.
AT1G14440	117.541	4.45384	0.76636	5.81169	6.18467e-09	1.17934e-07	1.48346	2.5344	2.74908	35.2466	27.4227	86.4551	AT1G14440	AtHB31, FTM2, HB31, ZHD4	AT1G14440	NA
AT3G23470	44.9405	4.44821	1.38259	3.21731	0.00129399	0.00580346	0	0	0	0	2.19382	13.9123	AT3G23470	NA	AT3G23470	NA
AT5G60360	388.414	4.431	0.439793	10.0752	7.11276e-24	1.18801e-21	13.3512	21.5424	5.49816	144.397	267.646	466.063	AT5G60360	AALP, ALP, SAG2	AT5G60360	Encodes a senescence-associated thiol protease.
AT3G14362	18.816	4.42787	1.35231	3.27431	0.00105921	0.0049079	1.48346	0	0	13.6439	15.3567	2.98121	AT3G14362	DVL19, RTFL10	AT3G14362	NA
AT3G16400	178.032	4.4199	0.86096	5.13368	2.84129e-07	3.62264e-06	4.45039	7.6032	4.12362	62.5343	77.8805	207.691	AT3G16400	ATMLP-470, ATNSP1, NSP1	AT3G16400	Encodes a nitrile-specifier protein NSP1 responsible for constitutive and herbivore-induced simple nitrile formation in rosette leaves. NSP1 is one out of five (At3g16400/NSP1, At2g33070/NSP2, At3g16390/NSP3, At3g16410/NSP4 and At5g48180/NSP5) A. thaliana epithiospecifier protein (ESP) homologues that promote simple nitrile, but not epithionitrile or thiocyanate formation.
AT3G15720	222.608	4.40991	1.26186	3.49477	0.000474462	0.00247711	0	0	0	9.0959	1.09691	5.96242	AT3G15720	NA	AT3G15720	NA
AT4G39710	3.166	4.40719	1.52387	2.89211	0.00382667	0.0143845	0	0	0	3.41096	7.67836	4.96869	AT4G39710	FKBP16-2, PnsL4	AT4G39710	NA
AT5G10280	20.9441	4.40285	1.33738	3.29215	0.000994255	0.00464844	0	0	0	0	10.9691	4.96869	AT5G10280	ATMYB64, ATMYB92, MYB92	AT5G10280	Encodes a putative transcription factor (MYB92).
AT3G07130	290.511	4.39796	0.710368	6.19111	5.97426e-10	1.38912e-08	2.96693	2.5344	2.74908	20.4658	40.5856	111.299	AT3G07130	ATPAP15, PAP15	AT3G07130	Encodes PAP15, a purple acid phosphatase with phytase activity. Expression of PAP15 is developmentally and temporally regulated, with strong expression at the early stages of seedling growth and pollen germination. The expression is also organ/tissue-specific, with strongest expression in the vasculature, pollen grains, and roots. Recombinant PAP protein exhibits broad substrate specificity with …
AT4G11100	20.7091	4.39669	1.21138	3.62948	0.000283991	0.00159844	0	0	2.74908	7.95892	19.7443	29.8121	AT4G11100	NA	AT4G11100	NA
AT1G12090	225.235	4.39324	0.756252	5.80923	6.27614e-09	1.19461e-07	1.48346	1.2672	4.12362	46.6165	27.4227	69.5616	AT1G12090	ELP	AT1G12090	extensin-like protein (ELP)
AT1G01610	53.8651	4.38663	1.00175	4.37898	1.19237e-05	0.000100703	2.96693	1.2672	0	10.2329	35.1011	40.7432	AT1G01610	ATGPAT4, GPAT4	AT1G01610	Encodes a protein with glycerol-3-phosphate acyltransferase activity. Involved in cutin assembly. Is functional redundant of GPAT8.
AT1G47840	57.9608	4.38266	1.26782	3.45685	0.000546533	0.00281309	0	0	1.37454	11.3699	2.19382	16.8935	AT1G47840	HXK3	AT1G47840	Encodes a putative hexokinase.
AT1G53860	8.20557	4.38205	1.36698	3.20565	0.00134756	0.00600203	0	1.2672	0	4.54795	13.1629	12.9186	AT1G53860	NA	AT1G53860	NA
AT3G53800	505.477	4.37119	0.676001	6.46624	1.00471e-10	2.69939e-09	4.45039	38.016	12.3709	176.233	258.87	710.522	AT3G53800	Fes1B	AT3G53800	Encodes one of the Arabidopsis orthologs of the human Hsp70-binding protein 1 (HspBP-1) and yeast Fes1p: Fes1A (AT3G09350), Fes1B (AT3G53800), Fes1C (AT5G02150).
AT3G20940	5.13428	4.36839	1.61946	2.69744	0.00698743	0.0238341	0	0	0	0	6.58145	8.94363	AT3G20940	CYP705A30	AT3G20940	a member of A-type cytochrome P450
AT5G08000	31.248	4.35824	1.16188	3.75102	0.000176116	0.00105056	1.48346	1.2672	0	7.95892	10.9691	36.7683	AT5G08000	E13L3, PDCB2	AT5G08000	Encodes a member of the X8-GPI family of proteins. It localizes to the plasmodesmata and binds callose.
AT4G22214	3.09401	4.35493	1.80091	2.41818	0.0155982	0.0457536	0	0	0	2.27398	2.19382	10.9311	AT4G22214	NA	AT4G22214	Encodes a defensin-like (DEFL) family protein.
AT1G14350	8.04304	4.35349	1.64199	2.65135	0.00801713	0.0267011	0	0	0	3.41096	0	11.9248	AT1G14350	AtMYB124, FLP, MYB124	AT1G14350	Encodes a putative MYB transcription factor involved in stomata development, loss of FLP activity results in a failure of guard mother cells (GMCs) to adopt the guard cell fate, thus they continue to divide resulting in abnormal stomata consisting of clusters of numerous guard cell-like cells. This phenotype is enhanced in double mutants with MYB88.
AT4G08770	5.86106	4.35259	1.72462	2.5238	0.0116092	0.0360192	0	0	0	5.68494	9.87217	0	AT4G08770	Prx37	AT4G08770	NA
AT1G20440	408.193	4.35105	0.662912	6.56354	5.25468e-11	1.50028e-09	4.45039	19.008	19.2436	127.343	185.377	564.443	AT1G20440	AtCOR47, COR47, RD17	AT1G20440	Belongs to the dehydrin protein family, which contains highly conserved stretches of 7-17 residues that are repetitively scattered in their sequences, the K-, S-, Y- and lysine rich segments. Cold regulated gene, amino acid sequence homology with Group II LEA (late embryogenesis abundant) proteins. Also responds to osmotic stress, ABA, dehydration and inhibits e.coli growth while overexpressed. C…
AT2G33330	200.74	4.34634	1.0548	4.12056	3.77959e-05	0.000277082	0	1.2672	1.37454	20.4658	13.1629	21.8622	AT2G33330	PDLP3	AT2G33330	Encodes a plasmodesmal protein that affects the intercellular movement of molecules through the plasmodesmata. The protein has two DUF26 domains and a single transmembrane domain.
AT1G06080	43.362	4.33984	1.72497	2.5159	0.011873	0.0367012	0	1.2672	0	13.6439	3.29072	12.9186	AT1G06080	ADS1, AtADS1	AT1G06080	homologous to delta 9 acyl-lipid desaturases of cyanobacteria and acyl-CoA desaturases of yeast and mammals. expression down-regulated by cold temperature.
AT5G19340	6.76128	4.33691	1.48926	2.91213	0.00358976	0.0136242	1.48346	0	0	3.41096	3.29072	22.856	AT5G19340	NA	AT5G19340	NA
AT3G28220	9.64405	4.33232	1.27185	3.40631	0.000658469	0.00330438	1.48346	2.5344	0	15.9178	14.2598	51.6743	AT3G28220	NA	AT3G28220	NA
AT5G46700	5.28593	4.32578	1.68416	2.56851	0.0102138	0.0325047	0	0	0	7.95892	3.29072	3.97495	AT5G46700	TET1, TRN2	AT5G46700	Encodes a transmembrane protein of the tetraspanin (TET) family, one of 17 members found in Arabidopsis. Double mutant analysis showed that TRN1 and TRN2 act in the same pathway. Required for the maintenance of both the radial pattern of tissue differentiation in the root and for the subsequent circumferential pattern within the epidermis.
AT2G03500	12.309	4.32447	1.58609	2.7265	0.00640108	0.0221049	0	0	0	0	0	14.9061	AT2G03500	EFM, HHO4	AT2G03500	NA
AT5G63810	1347.13	4.32222	0.498373	8.67267	4.22108e-18	3.76014e-16	29.6693	64.6272	37.1126	420.686	647.176	1569.11	AT5G63810	AtBGAL10, BGAL10	AT5G63810	member of Glycoside Hydrolase Family 35
AT2G01990	3.70574	4.3095	1.59098	2.70871	0.00675446	0.0231696	0	0	0	7.95892	1.09691	5.96242	AT2G01990	NA	AT2G01990	NA
AT3G02980	10.1813	4.30931	1.38601	3.10914	0.00187634	0.00791235	0	0	0	7.95892	1.09691	5.96242	AT3G02980	MCC1	AT3G02980	Encodes MEIOTIC CONTROL OF CROSSOVERS1 (MCC1), a GCN5-related histone N-acetyltransferase. MCC1 appeared to be required in meiosis for normal chiasma number and distribution and for chromosome segregation. Activation tagging line has increased level of histone H3 acetylation.
AT3G44220	10.294	4.30478	1.45875	2.951	0.00316749	0.0122951	1.48346	0	0	5.68494	4.38763	18.881	AT3G44220	NHL17	AT3G44220	NA
AT2G04160	11.7854	4.30473	1.63734	2.6291	0.00856109	0.0281618	1.48346	0	0	2.27398	9.87217	16.8935	AT2G04160	AIR3	AT2G04160	isolated from differential screening of a cDNA library from auxin-treated root culture. encodes a protein similar to subtilisin-like serine protease which is believed to be active outside the plant cell.
AT5G50740	51.9102	4.29609	0.97929	4.38695	1.14952e-05	9.74613e-05	0	1.2672	4.12362	14.7808	16.4536	75.524	AT5G50740	AtHMP52	AT5G50740	NA
AT5G01870	20.544	4.28529	1.47103	2.91312	0.00357835	0.0135912	1.48346	0	0	1.13699	5.48454	21.8622	AT5G01870	NA	AT5G01870	Predicted to encode a PR (pathogenesis-related) protein. Belongs to the lipid transfer protein (PR-14) family with the following members: At2g38540/LTP1, At2g38530/LTP2, At5g59320/LTP3, At5g59310/LTP4, At3g51600/LTP5, At3g08770/LTP6, At2g15050/LTP7, At2g18370/LTP8, At2g15325/LTP9, At5g01870/LTP10, At4g33355/LTP11, At3g51590/LTP12, At5g44265/LTP13, At5g62065/LTP14, At4g08530/LTP15.
AT2G15420	20.1751	4.28166	0.883492	4.84629	1.25793e-06	1.36211e-05	1.48346	0	4.12362	21.6028	27.4227	57.6367	AT2G15420	NA	AT2G15420	NA
AT2G24270	516.532	4.28103	0.357597	11.9717	5.00128e-33	1.85631e-30	43.0204	57.024	34.3635	491.179	669.114	1457.81	AT2G24270	ALDH11A3	AT2G24270	Encodes a protein with non-phosphorylating NADP-dependent glyceraldehyde-3-phosphate dehydrogenase activity. The activity of the enzyme was determined from leaf extracts; the enzyme has not been purified to confirm activity.
AT1G22260	7.64024	4.27852	1.58442	2.70037	0.00692623	0.0236575	0	1.2672	0	2.27398	3.29072	22.856	AT1G22260	AtZYP1a, ZYP1, ZYP1a	AT1G22260	One of two nearly identical proteins (ZYP1b) identified by similarity to transverse filament (TF) proteins. These proteins are involved in chromosome synapsis during meiosis I and localize to the synaptonemal complex (SC). Single mutants have reduced fertility and double mutants (induced by RNAi) have severely reduced fertility.
AT1G26960	3.26873	4.27353	1.63028	2.62135	0.00875828	0.02866	0	0	0	3.41096	2.19382	8.94363	AT1G26960	AtHB23, HB23	AT1G26960	Encodes a homeodomain leucine zipper class I (HD-Zip I) protein.
AT1G15210	400.278	4.27335	0.695495	6.14432	8.0305e-10	1.82904e-08	5.93385	6.336	1.37454	31.8357	78.9774	153.035	AT1G15210	ABCG35, ATPDR7, PDR7	AT1G15210	NA
AT4G38970	346.166	4.27316	0.53994	7.91414	2.48966e-15	1.44639e-13	16.3181	24.0768	17.869	216.028	244.611	668.785	AT4G38970	AtFBA2, FBA2	AT4G38970	Protein is tyrosine-phosphorylated and its phosphorylation state is modulated in response to ABA in Arabidopsis thaliana seeds.
AT1G33240	490.906	4.27199	0.486194	8.78659	1.54174e-18	1.45076e-16	2.96693	12.672	2.74908	98.9179	72.3959	194.772	AT1G33240	AT-GTL1, ATGTL1, GTL1	AT1G33240	Encodes a plant transcriptional activator that contains two separate, but similar, trihelix DNA-binding domains, similar to GT-2. Gene is expressed in all aerial parts of the plant, with higher level of expression in siliques. At-GTL2 was thought to be a duplicated copy of this gene but is likely to be a cloning artefact, the result of a chimeric clone. Regulates ploidy-dependent cell growth in t…
AT5G03890	3.88746	4.26782	1.66056	2.5701	0.0101669	0.0323915	0	0	0	4.54795	0	9.93737	AT5G03890	NA	AT5G03890	NA
AT1G67750	23.7019	4.25922	1.44698	2.94352	0.00324506	0.0125323	0	2.5344	0	4.54795	7.67836	38.7557	AT1G67750	NA	AT1G67750	NA
AT1G14540	6.50624	4.24041	1.34474	3.15333	0.00161422	0.00698785	1.48346	1.2672	0	9.0959	31.8103	10.9311	AT1G14540	PER4, PRX4	AT1G14540	NA
AT1G04697	1.98347	4.2319	1.6998	2.48965	0.012787	0.0390068	0	0	0	6.82193	5.48454	1.98747	AT1G04697	NA	AT1G04697	NA
AT4G05845	6.07716	4.23102	1.50716	2.80728	0.00499611	0.0179882	0	1.2672	0	21.6028	3.29072	2.98121	AT4G05845	NA	AT4G05845	NA
AT2G03090	425.361	4.2237	0.693782	6.08793	1.14383e-09	2.53323e-08	20.7685	79.8336	30.2399	278.562	537.485	1635.69	AT2G03090	ATEXP15, ATEXPA15, ATHEXP, EXP15, EXPA15	AT2G03090	member of Alpha-Expansin Gene Family. Naming convention from the Expansin Working Group (Kende et al, 2004. Plant Mol Bio). Involved in the formation of nematode-induced syncytia in roots of Arabidopsis thaliana.
AT4G01883	8.95795	4.22361	1.63479	2.58358	0.00977803	0.031357	0	0	0	0	0	13.9123	AT4G01883	MLBP1	AT4G01883	NA
AT1G04020	16.0208	4.2174	1.55064	2.71978	0.00653257	0.0225202	0	0	1.37454	1.13699	2.19382	23.8497	AT1G04020	ATBARD1, BARD1, ROW1	AT1G04020	Encodes a protein containing two tandem BRCA1 C-Terminal (BRCT) domains, which function in phosphorylation-dependent proteinprotein interactions.Loss of function mutations cause defects in meristem organization due to failure to repress WUS. BARD1 binds to WUS promoter and over expression of BARD reduces the extent of WUS expression.
AT3G43800	36.912	4.21534	1.30472	3.23084	0.00123426	0.00558046	0	1.2672	0	5.68494	5.48454	15.8998	AT3G43800	ATGSTU27, GSTU27	AT3G43800	Encodes glutathione transferase belonging to the tau class of GSTs. Naming convention according to Wagner et al. (2002).
AT2G15090	58.3431	4.21102	0.881627	4.77642	1.78445e-06	1.86567e-05	4.45039	2.5344	0	26.1507	16.4536	84.4676	AT2G15090	KCS8	AT2G15090	Encodes KCS8, a member of the 3-ketoacyl-CoA synthase family involved in the biosynthesis of VLCFA (very long chain fatty acids).
AT5G05180	12.4192	4.21081	1.47591	2.85302	0.00433056	0.0159907	0	1.2672	0	0	14.2598	12.9186	AT5G05180	NA	AT5G05180	NA
AT2G37590	29.0165	4.21	1.3028	3.2315	0.00123144	0.00557023	0	1.2672	0	3.41096	6.58145	16.8935	AT2G37590	ATDOF2.4, DOF2.4, PEAR1	AT2G37590	NA
AT5G16870	52.6397	4.20235	0.928791	4.52454	6.0527e-06	5.54453e-05	1.48346	2.5344	0	11.3699	18.6474	44.7182	AT5G16870	NA	AT5G16870	NA
AT3G56480	34.4619	4.20153	0.899636	4.67026	3.00821e-06	2.97159e-05	0	2.5344	2.74908	17.0548	21.9382	60.618	AT3G56480	SCAB3	AT3G56480	NA
AT4G36240	5.99158	4.19795	1.49182	2.81398	0.0048932	0.0176902	0	0	0	6.82193	1.09691	5.96242	AT4G36240	GATA7	AT4G36240	Encodes a member of the GATA factor family of zinc finger transcription factors.
AT3G06955	92.6997	4.19644	0.30754	13.6452	2.15621e-42	1.44056e-39	17.8016	20.2752	12.3709	308.124	289.584	329.921	AT3G06955	NA	AT3G06955	NA
AT1G26233	63.2949	4.18766	1.24786	3.35586	0.000791175	0.00385078	1.48346	0	0	14.7808	3.29072	8.94363	AT1G26233	NA	AT1G26233	NA
AT5G49170	8.92048	4.18533	1.48098	2.82605	0.00471264	0.0171488	0	0	0	4.54795	2.19382	6.95616	AT5G49170	NA	AT5G49170	NA
AT4G18480	208.039	4.18381	0.548468	7.62818	2.38083e-14	1.17825e-12	4.45039	10.1376	13.7454	98.9179	83.365	335.883	AT4G18480	CH-42, CH42, CHL11, CHLI-1, CHLI1, LOST1	AT4G18480	Encodes the CHLI subunit of magnesium chelatase which is required for chlorophyll biosynthesis. All four cysteine residues of the protein form two disulfide bonds (Cys102-Cys193 and Cys354-Cys396) under oxidized conditions but are fully reduced by reduction. It was suggested that the redox state of CHLI is regulated in vivo by the change of the redox environment in the chloroplasts probably via t…
AT5G45650	885.26	4.17243	0.891177	4.68193	2.84185e-06	2.82255e-05	0	7.6032	1.37454	26.1507	25.2289	116.267	AT5G45650	NA	AT5G45650	NA
AT3G12710	7.58831	4.16495	1.55146	2.68453	0.00726316	0.0246487	0	0	0	3.41096	1.09691	8.94363	AT3G12710	NA	AT3G12710	NA
AT1G09460	41.5011	4.15033	0.919425	4.51404	6.36028e-06	5.77351e-05	1.48346	3.8016	0	31.8357	7.67836	56.643	AT1G09460	NA	AT1G09460	NA
AT4G12910	3367.7	4.1473	0.483778	8.57274	1.01055e-17	8.33513e-16	10.3842	10.1376	9.62178	115.973	125.048	292.159	AT4G12910	scpl20	AT4G12910	NA
AT5G48560	5.84477	4.14441	1.4564	2.84565	0.00443203	0.0162842	0	0	1.37454	10.2329	10.9691	4.96869	AT5G48560	CIB2	AT5G48560	NA
AT1G32930	63.5033	4.12763	1.16863	3.53201	0.000412409	0.00220307	0	1.2672	1.37454	2.27398	12.066	32.7933	AT1G32930	AtGALT31A, GALT31A	AT1G32930	NA
AT5G19100	24.7966	4.1153	1.30543	3.15245	0.00161906	0.00700579	0	1.2672	0	6.82193	7.67836	10.9311	AT5G19100	NA	AT5G19100	NA
AT3G47560	36.205	4.11008	1.3017	3.15747	0.00159145	0.00690871	1.48346	0	0	7.95892	4.38763	12.9186	AT3G47560	NA	AT3G47560	NA
AT5G56610	10.84	4.10934	1.37372	2.99141	0.00277695	0.0110433	0	1.2672	0	10.2329	2.19382	12.9186	AT5G56610	PTPMT2	AT5G56610	NA
AT5G43750	9.11722	4.09884	1.47972	2.77002	0.00560536	0.0197866	0	1.2672	0	7.95892	3.29072	13.9123	AT5G43750	NDH18, PnsB5	AT5G43750	NA
AT5G14750	92.7556	4.0729	0.875371	4.65278	3.27493e-06	3.20192e-05	1.48346	1.2672	2.74908	10.2329	19.7443	61.6117	AT5G14750	ATMYB66, MYB66, WER, WER1	AT5G14750	Encodes a MyB-related protein containing R2 and R3 repeats, involved in root and hypocotyl epidermal cell fate determination. Loss of function mutations make extra root hairs. Nuclear localized protein is a positive regulator for expression of CAPRICE (CPC).
AT2G37100	48.7637	4.07252	0.645654	6.30759	2.83416e-10	6.93591e-09	0	8.8704	1.37454	35.2466	75.6867	70.5553	AT2G37100	NA	AT2G37100	NA
AT3G59780	108.577	4.05888	0.735092	5.52159	3.35938e-08	5.39087e-07	2.96693	3.8016	0	15.9178	41.6825	55.6493	AT3G59780	NA	AT3G59780	NA
AT3G23880	49.8565	4.05778	1.26332	3.212	0.00131814	0.00589655	0	1.2672	0	9.0959	4.38763	10.9311	AT3G23880	NA	AT3G23880	NA
AT5G44560	38.8749	4.05442	0.639178	6.34318	2.25073e-10	5.63892e-09	4.45039	3.8016	1.37454	45.4795	43.8763	69.5616	AT5G44560	VPS2.2	AT5G44560	NA
AT4G29030	18.6511	4.0377	1.49303	2.70436	0.00684362	0.0234433	0	0	0	2.27398	0	9.93737	AT4G29030	NA	AT4G29030	NA
AT4G13600	5.50929	4.03416	1.58603	2.54356	0.0109728	0.0344336	0	0	0	0	3.29072	8.94363	AT4G13600	NA	AT4G13600	NA
AT1G55370	7.84605	4.02986	1.6328	2.46806	0.0135847	0.0409934	0	0	0	2.27398	0	9.93737	AT1G55370	NDF5	AT1G55370	NA
AT2G36885	46.2697	4.02554	1.02149	3.94085	8.11946e-05	0.00053517	0	1.2672	2.74908	4.54795	21.9382	39.7495	AT2G36885	NA	AT2G36885	NA
AT1G26770	2236	4.00502	0.775274	5.16594	2.39239e-07	3.08761e-06	2.96693	35.4816	13.7454	152.356	132.726	559.474	AT1G26770	AT-EXP10, ATEXP10, ATEXPA10, ATHEXP, EXP10, EXPA10	AT1G26770	Encodes an expansin. Naming convention from the Expansin Working Group (Kende et al, Plant Mol Bio). Involved in the formation of nematode-induced syncytia in roots of Arabidopsis thaliana.
AT4G39790	9.76339	4.00182	1.25216	3.19594	0.00139374	0.00617753	0	1.2672	1.37454	20.4658	2.19382	20.8685	AT4G39790	NA	AT4G39790	NA
AT1G20480	7.63575	3.98755	1.35276	2.94771	0.00320133	0.0123965	0	0	1.37454	2.27398	12.066	8.94363	AT1G20480	NA	AT1G20480	NA
AT1G61190	12.0016	3.97721	1.3297	2.99106	0.0027801	0.0110515	0	1.2672	0	5.68494	4.38763	12.9186	AT1G61190	NA	AT1G61190	NA
AT3G45610	21.7031	3.96731	1.07834	3.6791	0.00023406	0.00135156	0	3.8016	0	9.0959	23.0351	30.8058	AT3G45610	DOF6	AT3G45610	NA
AT2G27130	10.701	3.96253	1.42236	2.78589	0.00533811	0.0190428	0	0	0	4.54795	3.29072	3.97495	AT2G27130	LTPG12	AT2G27130	NA
AT3G06360	10.349	3.96034	1.35774	2.91686	0.00353573	0.0134497	0	0	0	3.41096	4.38763	3.97495	AT3G06360	AGP27, ATAGP27	AT3G06360	Encodes an arabinogalactan-protein (AGP27).
AT2G14890	385.98	3.95967	0.736352	5.37741	7.55644e-08	1.112e-06	1.48346	13.9392	13.7454	71.6302	83.365	303.09	AT2G14890	AGP9	AT2G14890	putative proline-rich protein (At2g14890) mRNA, complete
AT1G07370	59.9561	3.95412	1.00076	3.95111	7.77889e-05	0.000516229	2.96693	1.2672	0	18.1918	7.67836	37.762	AT1G07370	ATPCNA1, PCNA1	AT1G07370	Encodes putative proliferating cell nuclear antigen involved in cell cycle regulation.
AT5G08370	23.1817	3.95063	1.14824	3.4406	0.000580435	0.00296399	0	2.5344	2.74908	10.2329	15.3567	57.6367	AT5G08370	AGAL2, AtAGAL2	AT5G08370	NA
AT3G22550	67.5819	3.94209	0.88803	4.43914	9.03179e-06	7.85695e-05	1.48346	2.5344	0	23.8767	13.1629	25.8372	AT3G22550	NA	AT3G22550	NA
AT2G05065	15.7825	3.93872	0.964735	4.0827	4.45156e-05	0.000319565	1.48346	1.2672	1.37454	17.0548	23.0351	22.856	AT2G05065	NA	AT2G05065	NA
AT1G22710	601.172	3.93319	0.268418	14.6532	1.28438e-48	1.35488e-45	90.4913	76.032	49.4834	873.207	825.972	1593.95	AT1G22710	ATSUC2, SUC2, SUT1	AT1G22710	Encodes for a high-affinity transporter essential for phloem loading and long-distance transport. A major sucrose transporter, AtSUC2 can also transport a wide range of physiological and synthetic glucose conjugates with both &#945;- or &#946;-linkage.
AT2G40820	28.4842	3.93196	0.923204	4.25904	2.05307e-05	0.000162715	1.48346	1.2672	4.12362	13.6439	12.066	78.5052	AT2G40820	NA	AT2G40820	NA
AT1G62480	18.2653	3.93062	1.31443	2.99037	0.0027864	0.0110721	2.96693	0	1.37454	5.68494	6.58145	51.6743	AT1G62480	NA	AT1G62480	NA
AT1G76730	43.8553	3.92973	0.794762	4.94454	7.63225e-07	8.75634e-06	5.93385	0	1.37454	15.9178	29.6165	59.6242	AT1G76730	COG0212	AT1G76730	NA
AT4G38950	11.1359	3.90869	1.25129	3.12372	0.00178582	0.00760262	2.96693	0	0	6.82193	9.87217	24.8434	AT4G38950	NA	AT4G38950	NA
AT3G45320	7.42636	3.90555	1.60798	2.42886	0.0151465	0.0446968	0	0	0	1.13699	1.09691	8.94363	AT3G45320	NA	AT3G45320	NA
AT3G06770	9.7517	3.90152	1.38867	2.80955	0.00496114	0.0178842	0	1.2672	0	6.82193	1.09691	13.9123	AT3G06770	NA	AT3G06770	NA
AT5G49630	92.2639	3.90137	0.80858	4.82496	1.4003e-06	1.49766e-05	2.96693	1.2672	1.37454	14.7808	19.7443	46.7056	AT5G49630	AAP6	AT5G49630	Is a high affinity amino acid transporter capable of transporting aspartate and tryptophan. May be involved in the amino acid uptake from xylem.
AT4G10560	9.99821	3.90072	1.2718	3.06709	0.00216151	0.00891789	0	2.5344	0	7.95892	15.3567	16.8935	AT4G10560	MEE53	AT4G10560	NA
AT3G51670	55.7092	3.87705	0.801557	4.8369	1.3188e-06	1.4173e-05	1.48346	2.5344	2.74908	20.4658	19.7443	59.6242	AT3G51670	PATL6	AT3G51670	NA
AT4G26540	7.86505	3.8608	1.4833	2.60284	0.00924545	0.0299655	0	0	0	9.0959	1.09691	0.993737	AT4G26540	RGFR3, RGI3	AT4G26540	NA
AT2G20980	17.3618	3.85733	1.247	3.0933	0.00197946	0.00829486	0	1.2672	1.37454	6.82193	5.48454	26.8309	AT2G20980	MCM10	AT2G20980	Similar to MCM10, which in other organism was shown to be involved in the initiation of DNA replication.
AT3G48700	159.933	3.83825	1.00615	3.8148	0.000136293	0.000841305	0	3.8016	1.37454	6.82193	13.1629	56.643	AT3G48700	ATCXE13, CXE13	AT3G48700	NA
AT4G14120	7.07091	3.83689	1.45347	2.63982	0.00829489	0.0274338	0	0	0	6.82193	1.09691	2.98121	AT4G14120	NA	AT4G14120	NA
AT1G78260	10.464	3.83643	1.46426	2.62004	0.00879184	0.0287463	0	0	0	3.41096	5.48454	1.98747	AT1G78260	NA	AT1G78260	NA
AT1G19115	6.63024	3.82815	1.6089	2.37936	0.0173427	0.0499139	0	0	0	0	8.77527	1.98747	AT1G19115	AtNGR3, DRO2, LAZY3	AT1G19115	NA
AT3G50200	62.1345	3.82815	1.30182	2.94061	0.00327562	0.0126321	0	0	0	0	9.87217	0.993737	AT3G50200	NA	AT3G50200	NA
AT1G65620	28.4195	3.81723	1.37016	2.78597	0.00533678	0.0190428	0	0	1.37454	1.13699	4.38763	14.9061	AT1G65620	AS2	AT1G65620	required for formation of a symmetric flat leaf lamina, encodes a member of a family of proteins characterized by cysteine repeats and a leucine zipper; involved in KNOX gene regulation. Acts together with ASL1 in proximal-distal symmetry determination. Forms a complex with AS1 that binds to the BP promoter and leads to silencing of BP., Required for formation of a symmetric flat leaf lamina, enc…
AT5G67280	243.885	3.81485	0.586402	6.50552	7.74226e-11	2.12573e-09	5.93385	1.2672	2.74908	35.2466	36.198	62.6054	AT5G67280	RLK	AT5G67280	NA
AT1G80690	14.8133	3.81022	1.38813	2.74486	0.00605374	0.0210871	0	0	0	1.13699	4.38763	4.96869	AT1G80690	NA	AT1G80690	NA
AT5G46280	93.2858	3.80462	0.728366	5.22351	1.75564e-07	2.3664e-06	1.48346	6.336	1.37454	21.6028	31.8103	78.5052	AT5G46280	MCM3	AT5G46280	NA
AT4G31620	4.76942	3.7996	1.49783	2.53674	0.011189	0.0349698	0	0	0	2.27398	2.19382	5.96242	AT4G31620	REM36	AT4G31620	NA
AT5G11050	3.35779	3.799	1.52361	2.49341	0.0126522	0.0386507	0	1.2672	1.37454	17.0548	7.67836	12.9186	AT5G11050	AtMYB64, MYB64, URP10	AT5G11050	Member of R2R3-MYB transcription factor gene family.
AT4G22810	19.8668	3.79366	1.29357	2.93272	0.00336011	0.0128923	0	0	2.74908	3.41096	5.48454	28.8184	AT4G22810	AHL24	AT4G22810	NA
AT2G29680	7.80313	3.79109	1.49572	2.53462	0.0112569	0.0351272	0	0	0	2.27398	1.09691	6.95616	AT2G29680	ATCDC6, CDC6	AT2G29680	Encodes cell division control protein 6 (CDC6).
AT1G30455	4.58627	3.78902	1.25929	3.00887	0.00262225	0.0105559	1.48346	1.2672	0	17.0548	10.9691	9.93737	AT1G30455	NA	AT1G30455	NA
AT4G22250	47.9035	3.78868	0.670498	5.65054	1.59945e-08	2.75884e-07	5.93385	5.0688	5.49816	34.1096	53.7485	139.123	AT4G22250	NA	AT4G22250	NA
AT5G56580	32.4242	3.78617	1.26209	2.99993	0.00270043	0.0108055	0	1.2672	0	4.54795	8.77527	6.95616	AT5G56580	ANQ1, ATMKK6, MKK6, SUMM4	AT5G56580	Encodes a member of the MAP Kinase Kinase family of proteins. It can phosphorylate MPK12 in vitro and it can be dephosphorylated by MKP2 in vitro.
AT1G54410	718.304	3.78319	0.533375	7.09292	1.31309e-12	4.98454e-11	53.4047	145.728	107.214	890.262	975.151	2358.14	AT1G54410	AtHIRD11, HIRD11	AT1G54410	NA
AT1G69230	18.3034	3.77253	1.02737	3.67204	0.000240623	0.00138547	1.48346	0	2.74908	9.0959	14.2598	32.7933	AT1G69230	SP1L2	AT1G69230	SPIRAL1-LIKE2 belongs to a six-member gene family in Arabidopsis; all members share a high sequence similarity in amino- and carboxy-terminal regions. Regulates cortical microtubule organization. Mutant plants exhibit altered patterns of root and organ growth as a result of defective anisotropic cell expansion.
AT5G46650	4.10891	3.77088	1.56496	2.40957	0.0159714	0.0467049	0	0	0	0	2.19382	7.9499	AT5G46650	ATL30	AT5G46650	NA
AT4G36540	95.4138	3.76626	1.10349	3.41306	0.000642377	0.00323578	0	2.5344	0	13.6439	2.19382	20.8685	AT4G36540	BEE2	AT4G36540	NA
AT3G50330	19.8837	3.76376	1.58063	2.38118	0.0172574	0.0497215	0	0	0	1.13699	0	8.94363	AT3G50330	HEC2	AT3G50330	NA
AT2G24350	34.6987	3.73633	0.735129	5.08255	3.72397e-07	4.61878e-06	1.48346	1.2672	4.12362	21.6028	28.5196	40.7432	AT2G24350	NA	AT2G24350	NA
AT3G55330	48.4751	3.72984	0.691899	5.39073	7.01705e-08	1.04103e-06	2.96693	8.8704	2.74908	26.1507	48.264	122.23	AT3G55330	PPL1	AT3G55330	NA
AT5G55730	18.0962	3.71535	1.20784	3.07603	0.00209774	0.00869775	0	0	2.74908	9.0959	9.87217	16.8935	AT5G55730	FLA1	AT5G55730	fasciclin-like arabinogalactan-protein 1 (Fla1)
AT3G54040	5.73165	3.71193	1.39523	2.66044	0.00780386	0.0261036	0	0	1.37454	9.0959	3.29072	6.95616	AT3G54040	NA	AT3G54040	NA
AT1G77860	4.32529	3.70428	1.46326	2.53153	0.0113565	0.0353775	1.48346	0	0	7.95892	3.29072	7.9499	AT1G77860	KOM	AT1G77860	mutant has Altered morphology of pollen exine wall; Seven-Path Transmembrane Protein
AT4G26760	571.807	3.6987	0.436653	8.47058	2.44181e-17	1.88235e-15	13.3512	17.7408	9.62178	90.959	114.078	324.952	AT4G26760	MAP65-2	AT4G26760	NA
AT5G00855	6.87041	3.6932	1.05832	3.48967	0.000483616	0.00251704	0	2.5344	2.74908	30.6987	28.5196	10.9311	AT5G00855	NA	AT5G00855	NA
AT4G00020	17.2772	3.68643	1.28749	2.86326	0.00419305	0.0155603	1.48346	1.2672	0	5.68494	5.48454	23.8497	AT4G00020	BRCA2(IV), BRCA2A, EDA20, MEE43	AT4G00020	Ortholog of breast cancer susceptibility protein 2. Essential at meiosis. Interacts with either AtRad51 or AtDmc1 and ATDSS1(I). Involved in embryo sac development.
AT1G80340	251.061	3.67694	1.2871	2.85677	0.00427976	0.0158323	0	0	0	9.0959	0	0.993737	AT1G80340	ATGA3OX2, GA3OX2, GA4H	AT1G80340	Encodes a protein with gibberellin 3 &#946;-hydroxylase activity. The protein was heterologously expressed in E. coli and shown to catalyze the hydroxylation of both GA9 and GA20.
AT1G44575	75.4207	3.67523	0.830358	4.42607	9.59635e-06	8.30124e-05	4.45039	2.5344	4.12362	19.3288	64.7176	56.643	AT1G44575	CP22, NPQ4, PSBS	AT1G44575	Encoding PSII-S (CP22), a ubiquitous pigment-binding protein associated with photosystem II (PSII) of higher plants. Involved in nonphotochemical quenching rather than in photosynthesis. Mutant has a normal violaxanthin cycle but has a limited capacity of quenching singlet excited chlorophylls and is tolerant to lipid peroxidation.
AT2G39350	29.6154	3.67104	0.915358	4.0105	6.05905e-05	0.000416323	1.48346	1.2672	2.74908	12.5069	26.3258	30.8058	AT2G39350	ABCG1, WBC1	AT2G39350	NA
AT5G42030	58.5411	3.6709	0.546429	6.71798	1.84265e-11	5.6819e-10	0	8.8704	4.12362	48.8905	46.0701	77.5115	AT5G42030	ABIL4	AT5G42030	NA
AT3G50230	144.898	3.66706	0.568378	6.4518	1.10526e-10	2.91483e-09	8.90078	2.5344	0	27.2877	58.1361	53.6618	AT3G50230	NA	AT3G50230	NA
AT1G55760	77.0178	3.66665	1.29441	2.83269	0.00461586	0.0168512	0	0	0	2.27398	1.09691	5.96242	AT1G55760	SIBP1	AT1G55760	NA
AT1G08890	220.465	3.65304	0.403644	9.05015	1.42774e-19	1.47507e-17	13.3512	6.336	6.8727	70.4932	110.788	146.079	AT1G08890	NA	AT1G08890	NA
AT1G10750	148.926	3.64969	0.691935	5.27461	1.33037e-07	1.84275e-06	2.96693	3.8016	0	32.9726	25.2289	27.8246	AT1G10750	NA	AT1G10750	NA
AT5G44680	17.7285	3.64967	1.21906	2.99384	0.00275492	0.010971	0	0	2.74908	4.54795	7.67836	21.8622	AT5G44680	NA	AT5G44680	NA
AT5G02200	26.6845	3.64945	1.08968	3.3491	0.000810738	0.00393073	0	0	2.74908	11.3699	13.1629	9.93737	AT5G02200	FHL	AT5G02200	Encodes a small plant-specific protein with both nuclear localization and nuclear export signals that is specifically required, together with FHY1, for the light-regulated nuclear accumulation of phyA.
AT3G15170	17.5583	3.64486	1.38338	2.63475	0.00841984	0.0277792	0	0	0	1.13699	1.09691	6.95616	AT3G15170	ANAC054, ATNAC1, CUC1	AT3G15170	Encodes a transcription factor involved in shoot apical meristem formation and auxin-mediated lateral root formation. The gene is thought not to be involved in stress responses (NaCl, auxins, ethylene). <i>Cuc</i> mutant was first recognized at the heart stage, where embryos lacking two distinct bulges of cotyledonary primordia were observed.
AT2G45900	7.51248	3.63206	1.18429	3.06688	0.00216306	0.00892246	0	1.2672	2.74908	11.3699	26.3258	12.9186	AT2G45900	TRM13	AT2G45900	NA
AT3G21055	74.9349	3.63054	0.82129	4.42053	9.84599e-06	8.50251e-05	7.41732	2.5344	1.37454	10.2329	17.5505	109.311	AT3G21055	PSBTN	AT3G21055	Encodes photosystem II 5 kD protein subunit PSII-T. This is a nuclear-encoded gene (PsbTn) which also has a plastid-encoded paralog (PsbTc).
AT1G68230	4.31018	3.62826	1.4374	2.52419	0.0115966	0.035991	1.48346	1.2672	0	2.27398	6.58145	24.8434	AT1G68230	NA	AT1G68230	NA
AT1G63230	12.0333	3.6252	1.3102	2.7669	0.00565916	0.0199414	0	0	1.37454	6.82193	4.38763	6.95616	AT1G63230	NA	AT1G63230	NA
AT3G05740	12.9275	3.61867	1.50593	2.40295	0.0162635	0.047462	0	0	0	0	1.09691	7.9499	AT3G05740	RECQI1	AT3G05740	NA
AT1G68560	3129.43	3.61514	0.575106	6.28604	3.25676e-10	7.85503e-09	93.4582	134.323	171.817	602.604	983.927	3311.13	AT1G68560	ATXYL1, AXY3, GH31, TRG1, XYL1	AT1G68560	Encodes a bifunctional alpha-l-arabinofuranosidase/beta-d-xylosidase that belongs to family 3 of glycoside hydrolases.
AT1G26680	11.3926	3.61328	1.21822	2.96604	0.00301664	0.0118345	0	2.5344	1.37454	4.54795	9.87217	34.7808	AT1G26680	NA	AT1G26680	NA
AT4G31320	31.2628	3.61319	1.30028	2.77877	0.00545643	0.0193741	0	2.5344	0	1.13699	7.67836	23.8497	AT4G31320	SAUR37	AT4G31320	NA
AT4G39330	103.454	3.60607	0.887442	4.06345	4.83537e-05	0.000342578	1.48346	2.5344	1.37454	20.4658	10.9691	34.7808	AT4G39330	ATCAD9, CAD9	AT4G39330	NA
AT3G23730	350.284	3.59828	1.33082	2.70382	0.00685475	0.0234734	1.48346	0	0	0	6.58145	10.9311	AT3G23730	XTH16	AT3G23730	NA
AT1G53430	19.6505	3.59432	0.851575	4.22079	2.43449e-05	0.000188178	1.48346	7.6032	0	14.7808	64.7176	33.7871	AT1G53430	NILR2	AT1G53430	NA
AT2G32179	16.9532	3.59048	1.12467	3.19248	0.00141057	0.00623694	1.48346	0	1.37454	5.68494	15.3567	11.9248	AT2G32179	NA	AT2G32179	NA
AT5G14890	20.0019	3.57903	0.850063	4.21031	2.5502e-05	0.000196213	1.48346	2.5344	2.74908	7.95892	28.5196	44.7182	AT5G14890	NA	AT5G14890	NA
AT2G22420	385.292	3.57504	0.88249	4.05108	5.0982e-05	0.000359042	1.48346	0	2.74908	14.7808	7.67836	25.8372	AT2G22420	PRX17	AT2G22420	NA
AT5G08391	9.18312	3.57244	1.08572	3.29038	0.00100051	0.00467334	0	3.8016	0	4.54795	15.3567	27.8246	AT5G08391	NA	AT5G08391	NA
AT3G15570	9.65595	3.55636	0.976052	3.64362	0.00026883	0.00152467	0	2.5344	4.12362	9.0959	30.7134	39.7495	AT3G15570	NA	AT3G15570	NA
AT5G26850	106.365	3.54984	0.551226	6.43991	1.19546e-10	3.1362e-09	13.3512	7.6032	15.1199	63.6713	107.497	248.434	AT5G26850	NA	AT5G26850	NA
AT2G02010	11.1426	3.54749	1.18448	2.99499	0.00274458	0.010941	0	5.0688	1.37454	4.54795	58.1361	14.9061	AT2G02010	GAD4	AT2G02010	NA
AT1G28660	742.881	3.53099	0.487667	7.24058	4.46758e-13	1.8163e-11	2.96693	3.8016	8.24724	43.2055	47.1671	82.4802	AT1G28660	NA	AT1G28660	NA
AT3G62760	6.62423	3.5275	1.40599	2.5089	0.0121108	0.0373269	1.48346	0	0	5.68494	3.29072	7.9499	AT3G62760	ATGSTF13	AT3G62760	Encodes glutathione transferase belonging to the phi class of GSTs. Naming convention according to Wagner et al. (2002).
AT1G67090	4923.79	3.52729	0.226205	15.5933	8.0848e-55	1.01277e-51	563.716	674.151	607.547	5290.4	5491.12	10499.8	AT1G67090	RBCS1A	AT1G67090	NA
AT1G20530	21.3211	3.52671	0.740585	4.76205	1.91634e-06	1.98506e-05	0	5.0688	2.74908	15.9178	30.7134	46.7056	AT1G20530	NA	AT1G20530	NA
AT2G28605	23.892	3.52559	0.894705	3.94051	8.13091e-05	0.000535726	1.48346	1.2672	4.12362	26.1507	9.87217	42.7307	AT2G28605	NA	AT2G28605	Encodes a PsbP domain-OEC23 like protein localized in thylakoid (peripheral-lumenal side).
AT3G56270	53.951	3.52266	0.883622	3.98662	6.70222e-05	0.000454594	0	3.8016	0	12.5069	17.5505	16.8935	AT3G56270	NA	AT3G56270	NA
AT4G38400	8.17528	3.5221	1.44253	2.44162	0.0146217	0.0434552	0	1.2672	0	3.41096	5.48454	7.9499	AT4G38400	ATEXLA2, ATEXPL2, ATHEXP, EXLA2, EXPL2	AT4G38400	member of EXPANSIN-LIKE. Naming convention from the Expansin Working Group (Kende et al, 2004. Plant Mol Bio)
AT3G63210	189.805	3.51934	0.34758	10.1253	4.26761e-24	7.24878e-22	10.3842	35.4816	15.1199	177.37	225.963	308.058	AT3G63210	MARD1	AT3G63210	encodes a novel zinc-finger protein with a proline-rich N-terminus, identical to senescence-associated protein SAG102
AT4G21490	214.87	3.51741	0.930185	3.78141	0.000155944	0.000949447	2.96693	0	1.37454	11.3699	4.38763	30.8058	AT4G21490	NDB3	AT4G21490	NA
AT2G37640	2092.18	3.51729	0.405987	8.66356	4.57261e-18	4.01968e-16	102.359	150.797	125.083	808.398	1011.35	2514.15	AT2G37640	ATEXP3, ATEXPA3, ATHEXP, EXP3, EXPA3	AT2G37640	member of Alpha-Expansin Gene Family. Naming convention from the Expansin Working Group (Kende et al, 2004. Plant Mol Bio). Involved in the formation of nematode-induced syncytia in roots of Arabidopsis thaliana.
AT1G65390	23.7967	3.51456	1.38867	2.53089	0.0113775	0.0354208	0	0	0	0	8.77527	0	AT1G65390	ATPP2-A5, PP2-A5	AT1G65390	NA
AT5G55620	36.121	3.50462	0.610677	5.7389	9.5292e-09	1.74743e-07	22.252	1.2672	4.12362	140.986	80.0743	84.4676	AT5G55620	NA	AT5G55620	NA
AT1G70710	82.4271	3.50221	1.34191	2.60988	0.00905742	0.0294561	0	0	0	3.41096	2.19382	2.98121	AT1G70710	ATGH9B1, CEL1, GH9B1	AT1G70710	endo-1,4-beta-glucanase. Involved in cell elongation.
AT5G57420	40.9577	3.49981	1.11371	3.14247	0.00167531	0.00720343	2.96693	0	0	7.95892	14.2598	8.94363	AT5G57420	IAA33	AT5G57420	Belongs to auxin inducible gene family.
AT5G15150	46.1879	3.49415	1.32342	2.64023	0.00828493	0.0274063	0	0	0	1.13699	2.19382	4.96869	AT5G15150	ATHB-3, ATHB3, HAT7, HB-3	AT5G15150	homeobox-containing gene with an unusual feature: a leucine zipper motif adjacent to the carboxyl-terminal of the homeodomain structure. This gene is expressed primarily in the cortex of the root and the stem.
AT5G58595	14.4342	3.4936	1.36169	2.56562	0.010299	0.032724	0	0	0	1.13699	3.29072	3.97495	AT5G58595	NA	AT5G58595	NA
AT5G66920	762.846	3.48983	0.582477	5.99137	2.08084e-09	4.39475e-08	11.8677	35.4816	12.3709	94.37	167.827	413.395	AT5G66920	sks17	AT5G66920	NA
AT3G61580	204.653	3.4887	0.438181	7.96179	1.69567e-15	1.00849e-13	16.3181	26.6112	45.3598	213.754	255.58	523.699	AT3G61580	AtSLD1, SLD1	AT3G61580	NA
AT4G37110	7.90582	3.47666	1.38624	2.50797	0.0121426	0.0374002	0	2.5344	0	10.2329	7.67836	11.9248	AT4G37110	NA	AT4G37110	NA
AT4G30500	11.2674	3.44906	1.31055	2.63176	0.00849434	0.0279928	1.48346	0	0	5.68494	5.48454	4.96869	AT4G30500	NA	AT4G30500	NA
AT1G73965	4.65686	3.44202	1.40852	2.44371	0.014537	0.0432549	0	0	1.37454	4.54795	5.48454	5.96242	AT1G73965	CLE13	AT1G73965	Member of a large family of putative ligands homologous to the Clavata3 gene. Consists of a single exon. Can partially replace CLV3 function in vivo.
AT4G00150	26.8476	3.43995	0.843868	4.07641	4.57358e-05	0.000327036	1.48346	1.2672	2.74908	19.3288	12.066	27.8246	AT4G00150	ATHAM3, HAM3, LOM3, SCL6-IV	AT4G00150	NA
AT2G14820	10.7968	3.43814	1.11867	3.07343	0.00211615	0.00876322	2.96693	1.2672	0	4.54795	14.2598	25.8372	AT2G14820	MEL3, NPY2	AT2G14820	A member of the NPY gene family (NPY1/AT4G31820, NPY2/AT2G14820, NPY3/AT5G67440, NPY4/AT2G23050, NPY5/AT4G37590). Involved in auxin-mediated organogenesis.
AT2G35190	24.9469	3.43555	0.981486	3.50035	0.000464646	0.00243538	2.96693	5.0688	0	12.5069	17.5505	57.6367	AT2G35190	ATNPSN11, NPSN11, NSPN11	AT2G35190	plant-specific SNARE located in cell plate of dividing cells. cofractionates with the cytokinesis-specific syntaxin, KNOLLE, which is required for the formation of the cell plate.
AT4G34600	24.5548	3.43015	0.859665	3.9901	6.60465e-05	0.000448432	4.45039	2.5344	1.37454	14.7808	14.2598	59.6242	AT4G34600	CIF2	AT4G34600	NA
AT5G20700	11.9786	3.42426	1.30879	2.61636	0.00888723	0.0289967	2.96693	1.2672	0	9.0959	6.58145	28.8184	AT5G20700	NA	AT5G20700	NA
AT2G18876	143.877	3.4223	0.449964	7.60572	2.83316e-14	1.38163e-12	7.41732	6.336	5.49816	45.4795	78.9774	80.4927	AT2G18876	NA	AT2G18876	NA
AT2G18650	17.2487	3.42107	1.3138	2.60396	0.00921533	0.0298872	0	1.2672	0	2.27398	2.19382	10.9311	AT2G18650	ATL49, MEE16	AT2G18650	NA
AT1G62440	12.492	3.4159	1.40585	2.42978	0.0151082	0.0446087	1.48346	0	0	0	6.58145	8.94363	AT1G62440	LRX2	AT1G62440	encodes a paralog of LRX1 (LEUCINE-RICH REPEAT/EXTENSIN 1) which acts synergistically with LRX1 in root hair cell morphogenesis.
AT5G54160	122.564	3.41568	0.497471	6.86609	6.59848e-12	2.23684e-10	5.93385	7.6032	5.49816	75.0412	38.3918	90.4301	AT5G54160	AtCOMT, ATOMT1, COMT1, OMT1, OMT3	AT5G54160	A caffeic acid/5-hydroxyferulic acid O-methyltransferase. Interacts with 14-4-3 proteins in yeast 2 hybrid assay. AtOMT1 (At5g54160) encodes a flavonol 3-O-methyltransferase that is highly active towards quercetin and myricetin. The substrate specificity identifies the enzyme as flavonol 3-methyltransferase which replaces the former annotation of the gene to encode a caffeic acid/5-hydroxyferulic…
AT5G63800	14.529	3.41565	0.916744	3.72585	0.000194658	0.00114886	1.48346	3.8016	0	11.3699	17.5505	28.8184	AT5G63800	BGAL6, MUM2	AT5G63800	Involved in mucilage formation. Mutants form columella and outer cell wall architecture of the mucilage cells resembles wild-type. However, mum2 seeds completely lack seed coat mucilage. This mutation appears to represent a later step in the development of this cell-type. Encodes a beta-galactosidase involved in seed coat mucilage biosynthesis. Member of Glycoside Hydrolase Family 35
AT1G79620	5.58612	3.41482	1.27614	2.6759	0.00745292	0.0251691	0	2.5344	0	10.2329	6.58145	11.9248	AT1G79620	VRLK1	AT1G79620	NA
AT1G02250	4.19318	3.41357	1.39714	2.44325	0.0145556	0.0432947	2.96693	1.2672	0	29.5617	10.9691	3.97495	AT1G02250	anac005, NAC005	AT1G02250	NA
AT1G53250	43.6353	3.41252	0.690454	4.94242	7.71582e-07	8.83704e-06	8.90078	1.2672	8.24724	34.1096	34.0042	124.217	AT1G53250	NA	AT1G53250	NA
AT5G39210	17.4541	3.41186	0.887817	3.84298	0.000121551	0.000762041	0	2.5344	2.74908	10.2329	17.5505	29.8121	AT5G39210	CRR7	AT5G39210	Encodes a protein of the chloroplastic NAD(P)H dehydrogenase complex (NDH Complex) involved in respiration, photosystem I (PSI) cyclic electron transport and CO2 uptake. The product of this gene appears to be essential for the stable formation of the NDH Complex.
AT1G55740	629.124	3.40545	0.346011	9.84204	7.41902e-23	1.14384e-20	17.8016	24.0768	15.1199	130.754	159.052	316.008	AT1G55740	AtSIP1, RS1, SIP1	AT1G55740	NA
AT5G04890	5.10365	3.40304	1.10429	3.08165	0.00205858	0.00855372	2.96693	0	1.37454	17.0548	13.1629	13.9123	AT5G04890	RTM2	AT5G04890	Specifically restricts the long-distance movement of tobacco etch potyvirus (TEV) without involving either hypersensitive cell death or systemic acquired resistance. Multidomain protein containing an N-terminal region with high similarity to plant small heat shock proteins (HSPs).
AT4G25420	51.7885	3.39768	0.388768	8.73959	2.33952e-18	2.13141e-16	14.8346	6.336	12.3709	130.754	105.303	112.292	AT4G25420	AT2301, ATGA20OX1, GA20OX1, GA5	AT4G25420	Encodes gibberellin 20-oxidase that is involved in the later steps of the gibberellin biosynthetic pathway. Regulated by a circadian clock. Weak expression response to far red light.
AT4G20690	12.0842	3.39681	1.23283	2.7553	0.00586376	0.0205575	1.48346	0	1.37454	4.54795	3.29072	20.8685	AT4G20690	NA	AT4G20690	NA
AT4G14960	2092.93	3.39279	0.520509	6.51821	7.11499e-11	1.97242e-09	50.4378	141.926	96.2178	553.713	674.599	1807.61	AT4G14960	TUA6	AT4G14960	Encodes an alpha-tubulin isoform required for right handed helical growth.
AT5G64330	94.0647	3.38885	0.553013	6.12798	8.90037e-10	2.00438e-08	8.90078	17.7408	9.62178	43.2055	118.466	220.61	AT5G64330	JK218, NPH3, RPT3	AT5G64330	Involved in blue light response signaling pathway; interacts with the blue light photoreceptor NPH1.Null mutations abolish phototrophic responses of etiolated seedlings to low fluence blue light. Protein contains multiple protein-protein interaction domains.
AT4G10770	86.2166	3.38689	0.995818	3.40111	0.000671121	0.00335695	0	3.8016	0	5.68494	4.38763	31.7996	AT4G10770	ATOPT7, OPT7	AT4G10770	oligopeptide transporter
AT1G78290	419.994	3.38173	0.254398	13.2931	2.53885e-40	1.59019e-37	26.7023	32.9472	12.3709	225.124	234.738	294.146	AT1G78290	SNRK2-8, SNRK2.8, SRK2C	AT1G78290	NA
AT1G26570	27.5924	3.37309	1.05079	3.21004	0.00132714	0.00592823	0	0	4.12362	4.54795	9.87217	27.8246	AT1G26570	ATUGD1, UGD1	AT1G26570	NA
AT3G05910	603.921	3.37163	0.376596	8.9529	3.46252e-19	3.4874e-17	16.3181	13.9392	12.3709	105.74	95.431	237.503	AT3G05910	AtPAE12	AT3G05910	NA
AT5G43250	17.9863	3.36406	1.17409	2.86524	0.00416699	0.0154894	1.48346	0	1.37454	3.41096	7.67836	16.8935	AT5G43250	NF-YC13	AT5G43250	NA
AT3G56940	119.659	3.35797	0.54621	6.14775	7.85881e-10	1.79197e-08	10.3842	6.336	15.1199	55.7124	64.7176	203.716	AT3G56940	ACSF, CHL27, CRD1	AT3G56940	Encodes a putative ZIP protein with varying mRNA accumulation in leaves, stems and roots. Has a consensus carboxylate-bridged di-iron binding site.
AT2G19460	21.0136	3.3564	0.954872	3.51503	0.000439701	0.002329	5.93385	3.8016	0	5.68494	26.3258	66.5804	AT2G19460	NA	AT2G19460	NA
AT3G56370	56.3467	3.35308	1.02847	3.26027	0.00111308	0.0051192	4.45039	0	0	3.41096	10.9691	27.8246	AT3G56370	IRK	AT3G56370	NA
AT1G44800	341.587	3.34832	0.442737	7.56278	3.94534e-14	1.8783e-12	16.3181	2.5344	4.12362	50.0275	77.8805	96.3925	AT1G44800	SIAR1, UMAMIT18	AT1G44800	NA
AT4G01130	7.2162	3.3461	1.13003	2.96108	0.00306559	0.0119867	2.96693	1.2672	0	10.2329	9.87217	21.8622	AT4G01130	NA	AT4G01130	NA
AT2G25480	23.9002	3.33527	0.959863	3.47474	0.000511357	0.00265041	0	0	5.49816	12.5069	8.77527	33.7871	AT2G25480	NA	AT2G25480	NA
AT2G24610	12.1024	3.33319	1.13406	2.93916	0.00329099	0.01268	0	3.8016	0	5.68494	8.77527	25.8372	AT2G24610	ATCNGC14, CNGC14	AT2G24610	member of Cyclic nucleotide gated channel family
AT4G17670	40.5013	3.32234	0.814915	4.07691	4.56373e-05	0.000326565	4.45039	5.0688	0	25.0137	18.6474	51.6743	AT4G17670	NA	AT4G17670	NA
AT2G18380	15.4864	3.3207	1.35867	2.44408	0.014522	0.0432232	0	0	1.37454	1.13699	4.38763	8.94363	AT2G18380	GATA20, HANL1	AT2G18380	Encodes a member of the GATA factor family of zinc finger transcription factors.
AT2G41475	71.1081	3.32026	0.714852	4.64468	3.40604e-06	3.30753e-05	1.48346	2.5344	2.74908	20.4658	19.7443	27.8246	AT2G41475	ATS3A	AT2G41475	NA
AT1G14280	10.2081	3.3199	0.805613	4.12097	3.77288e-05	0.000276692	1.48346	1.2672	4.12362	21.6028	21.9382	24.8434	AT1G14280	PKS2	AT1G14280	Encodes phytochrome kinase substrate 2. PKS proteins are critical for hypocotyl phototropism. Forms a complex with Phot1, Phot2 and NPH3.
AT3G01516	24.0877	3.31812	1.2695	2.61373	0.00895596	0.0291592	2.96693	0	0	1.13699	4.38763	21.8622	AT3G01516	NA	AT3G01516	NA
AT5G66190	84.6983	3.31629	0.430858	7.69696	1.39339e-14	7.16095e-13	7.41732	5.0688	17.869	63.6713	106.4	130.18	AT5G66190	ATLFNR1, FNR1, LFNR1	AT5G66190	Encodes a leaf-type ferredoxin:NADP(H) oxidoreductase. It is present in both chloroplast stroma and thylakoid membranes but is more abundant in the thylakoid. The affinity of this enzyme for ferredoxin is slightly, but significantly, higher than AtLFNR2, an isoform of the same enzyme. AtLFNR1 forms a heterodimer with AtFNR2 and is also a prerequisite to attach AtFNR2 to the thylakoid membrane.
AT3G59100	52.8249	3.3149	0.642786	5.15708	2.5083e-07	3.22682e-06	4.45039	7.6032	1.37454	23.8767	39.4887	71.5491	AT3G59100	ATGSL11, gsl11, GSL11	AT3G59100	encodes a protein similar to callose synthase
AT1G02620	6.57936	3.31375	1.31058	2.52847	0.0114561	0.0356267	0	0	2.74908	17.0548	4.38763	5.96242	AT1G02620	NA	AT1G02620	NA
AT4G34760	55.313	3.30908	0.85481	3.87113	0.000108334	0.000688221	1.48346	3.8016	0	9.0959	19.7443	24.8434	AT4G34760	SAUR50	AT4G34760	NA
AT3G58850	40.8969	3.30856	1.35239	2.44645	0.0144271	0.0430301	0	0	0	3.41096	1.09691	2.98121	AT3G58850	HLH2, PAR2	AT3G58850	Encodes PHYTOCHROME RAPIDLY REGULATED2 (PAR2), an atypical basic helix-loop-helix (bHLP) protein. Closely related to PAR1 (At2g42870). Up regulated after simulated shade perception. Acts in the nucleus to control plant development and as a negative regulator of shade avoidance response. Functions as transcriptional repressor of auxin-responsive genes SAUR15 (AT4G38850) and SAUR68 (AT1G29510).
AT2G26730	44.9897	3.30816	0.67569	4.89597	9.78214e-07	1.08985e-05	0	6.336	4.12362	35.2466	24.132	47.6994	AT2G26730	NA	AT2G26730	NA
AT3G55890	14.843	3.30499	1.13067	2.92305	0.00346626	0.0132333	0	2.5344	0	10.2329	9.87217	6.95616	AT3G55890	NA	AT3G55890	NA
AT5G59240	35.1299	3.30389	1.3351	2.47463	0.0133374	0.0403329	0	0	0	1.13699	2.19382	3.97495	AT5G59240	NA	AT5G59240	NA
AT4G19030	40.3143	3.30195	1.38762	2.37958	0.0173325	0.0498936	0	0	0	0	4.38763	2.98121	AT4G19030	AT-NLM1, ATNLM1, NIP1;1, NLM1	AT4G19030	an aquaporin whose expression level is reduced by ABA, NaCl, dark, and dessication. is expressed at relatively low levels under normal conditions. Also functions in arsenite transport and tolerance.
AT4G19370	5.34259	3.30192	1.3183	2.50469	0.0122559	0.037693	2.96693	1.2672	0	2.27398	31.8103	6.95616	AT4G19370	MWL-2	AT4G19370	NA
AT2G26560	108.393	3.30094	0.899342	3.6704	0.000242175	0.0013928	7.41732	63.36	39.8617	85.2741	805.131	202.722	AT2G26560	PLA, PLA2A, PLAII, PLP2	AT2G26560	Encodes a lipid acyl hydrolase with wide substrate specificity that accumulates upon infection by fungal and bacterial pathogens. Protein is localized in the cytoplasm in healthy leaves, and in membranes in infected cells. Plays a role in cell death and differentially affects the accumulation of oxylipins. Contributes to resistance to virus.
AT1G09750	120.187	3.2983	0.518534	6.36082	2.00679e-10	5.09142e-09	23.7354	43.0848	37.1126	188.74	234.738	601.211	AT1G09750	NA	AT1G09750	NA
AT1G63220	15.2966	3.29365	1.22707	2.68415	0.00727147	0.0246728	0	2.5344	0	10.2329	3.29072	12.9186	AT1G63220	NA	AT1G63220	NA
AT2G21250	160.374	3.29284	0.529257	6.22162	4.92036e-10	1.15479e-08	10.3842	17.7408	9.62178	47.7535	83.365	240.484	AT2G21250	NA	AT2G21250	NA
AT5G14450	4955.05	3.29076	0.402734	8.17105	3.05716e-16	2.00244e-14	244.771	538.56	394.493	2405.87	2769.69	6356.94	AT5G14450	NA	AT5G14450	NA
AT2G31270	43.2567	3.28573	1.26927	2.58867	0.00963471	0.0309667	0	0	2.74908	3.41096	1.09691	21.8622	AT2G31270	ATCDT1A, CDT1, CDT1A	AT2G31270	Encodes a cyclin-dependent protein kinase. Involved in nuclear DNA replication and plastid division. Located in nucleus and chloroplast.
AT1G32060	32.014	3.28295	0.828318	3.96339	7.38935e-05	0.000494341	4.45039	11.4048	1.37454	31.8357	60.3299	77.5115	AT1G32060	PRK	AT1G32060	NA
AT4G13660	44.4023	3.27797	0.82844	3.9568	7.5962e-05	0.000506152	1.48346	3.8016	0	11.3699	14.2598	26.8309	AT4G13660	ATPRR2, PRR2	AT4G13660	Encodes a pinoresinol reductase involved in lignan biosynthesis. Expressed strongly in roots and less strongly in stems. Shows preference for pinoresinol and not lariciresinol.
AT4G01580	10.1744	3.26453	1.13514	2.87589	0.00402891	0.0150403	0	0	5.49816	3.41096	15.3567	33.7871	AT4G01580	NA	AT4G01580	NA
AT5G67100	95.802	3.26426	0.689203	4.73628	2.17674e-06	2.21915e-05	4.45039	2.5344	9.62178	14.7808	34.0042	109.311	AT5G67100	ICU2	AT5G67100	Encodes the putative catalytic subunit of the DNA polymerase alpha. Interacts with genes involved in chromatin-mediated cellular memory. ICU2 genetically interacts with TERMINAL FLOWER2, the ortholog of HETEROCHROMATIN PROTEIN1 of animals and yeasts, and with the Polycomb group (PcG) gene CURLY LEAF. A number of regulatory genes were derepressed in the icu2-1 mutant, including genes associated wi…
AT1G64760	15.3479	3.2634	1.33422	2.44593	0.014448	0.0430669	0	2.5344	0	3.41096	3.29072	18.881	AT1G64760	ZET	AT1G64760	NA
AT5G14690	31.5447	3.26184	1.05381	3.09528	0.00196624	0.00824463	0	1.2672	2.74908	2.27398	7.67836	28.8184	AT5G14690	NA	AT5G14690	NA
AT1G23750	35.1231	3.26108	0.80824	4.03479	5.46503e-05	0.000381391	2.96693	0	5.49816	22.7398	7.67836	48.6931	AT1G23750	NA	AT1G23750	NA
AT2G24280	2932.12	3.25857	0.361767	9.00738	2.11037e-19	2.15807e-17	108.293	149.53	112.712	669.686	931.275	1947.72	AT2G24280	NA	AT2G24280	NA
AT4G32630	5.45634	3.24247	0.988611	3.27983	0.00103871	0.00482924	1.48346	3.8016	0	13.6439	19.7443	17.8873	AT4G32630	NA	AT4G32630	NA
AT4G25530	34.5879	3.23695	0.575786	5.62179	1.88985e-08	3.22369e-07	10.3842	1.2672	4.12362	32.9726	41.6825	68.5679	AT4G25530	FWA, HDG6	AT4G25530	Encodes a homeodomain-containing transcription factor that controls flowering. FWA is silenced in wild type plants and reverse of the imprinted silencing causes a late flowering phenotype. FWA gene contains two tandem repeats around the transcription start site that are necessary and sufficient for silencing via DNA methylation.
AT1G22170	21.3836	3.23366	0.844212	3.83038	0.000127943	0.000796141	0	2.5344	4.12362	12.5069	15.3567	35.7745	AT1G22170	NA	AT1G22170	NA
AT5G60890	371.08	3.23241	0.510007	6.33796	2.3282e-10	5.804e-09	4.45039	6.336	2.74908	34.1096	30.7134	62.6054	AT5G60890	AtATR1, ATMYB34, ATR1, MYB34	AT5G60890	Myb-like transcription factor that modulates expression of ASA1, a key point of control in the tryptophan pathway; mutant has deregulated expression of ASA1 in dominant allele. Loss of function allele suggests ATR1 also functions at a control point for regulating indole glucosinolate homeostasis.
AT3G63430	10.5354	3.23119	1.04304	3.09787	0.00194918	0.0081765	2.96693	0	2.74908	6.82193	15.3567	29.8121	AT3G63430	TRM5	AT3G63430	NA
AT2G01670	41.415	3.22409	1.30246	2.47539	0.0133091	0.0402847	1.48346	0	0	0	5.48454	7.9499	AT2G01670	atnudt17, NUDT17	AT2G01670	NA
AT4G39210	178.424	3.221	0.46189	6.97352	3.09097e-12	1.0965e-10	1.48346	13.9392	16.4945	57.9864	81.1712	162.973	AT4G39210	APL3	AT4G39210	Encodes the large subunit of ADP-Glucose Pyrophosphorylase which catalyzes the first, rate limiting step in starch biosynthesis. The large subunit plays a regulatory role whereas the small subunit (ApS) is the catalytic isoform. Four isoforms (ApL1-4) have been identified. ApL3 is the major large subunit isoform present in inflorescences, fruits and roots.
AT5G44635	64.0939	3.2207	0.71475	4.50605	6.60449e-06	5.9601e-05	1.48346	2.5344	6.8727	20.4658	15.3567	65.5866	AT5G44635	MCM6	AT5G44635	NA
AT3G18670	9.51488	3.21986	1.14746	2.80607	0.00501496	0.0180328	0	3.8016	0	11.3699	13.1629	12.9186	AT3G18670	NA	AT3G18670	NA
AT2G26500	117.842	3.21681	0.500847	6.42273	1.33853e-10	3.49325e-09	7.41732	16.4736	9.62178	61.3973	68.0083	184.835	AT2G26500	NA	AT2G26500	NA
AT3G45850	82.9533	3.2167	0.537637	5.98303	2.19028e-09	4.60165e-08	2.96693	12.672	13.7454	57.9864	58.1361	159.992	AT3G45850	NA	AT3G45850	NA
AT4G22860	9.70113	3.20495	1.22245	2.62175	0.00874805	0.0286358	0	1.2672	1.37454	4.54795	4.38763	15.8998	AT4G22860	TPXL3	AT4G22860	NA
AT2G14830	3.49527	3.1989	1.27573	2.50751	0.0121584	0.0374333	1.48346	1.2672	1.37454	15.9178	10.9691	10.9311	AT2G14830	ISTL10	AT2G14830	NA
AT5G02970	33.9142	3.19546	0.585008	5.46225	4.7013e-08	7.2932e-07	1.48346	2.5344	8.24724	27.2877	39.4887	45.7119	AT5G02970	NA	AT5G02970	NA
AT4G10390	82.607	3.18517	0.512342	6.21688	5.07142e-10	1.18607e-08	7.41732	3.8016	4.12362	42.0686	35.1011	59.6242	AT4G10390	NA	AT4G10390	NA
AT1G43680	5.9994	3.1822	1.1898	2.67457	0.00748254	0.0252522	0	6.336	0	30.6987	13.1629	15.8998	AT1G43680	NA	AT1G43680	NA
AT5G16000	33.7551	3.17912	0.75132	4.23137	2.32267e-05	0.00018093	2.96693	1.2672	6.8727	28.4247	15.3567	55.6493	AT5G16000	AtNIK1, NIK1	AT5G16000	NSP-interacting kinase (NIK1), receptor-like kinase, involved in defense response against geminivirus It acts as a virulence target of the begomovirus nuclear shuttle protein (NSP).
AT5G19530	15.6964	3.1719	1.22362	2.59223	0.00953568	0.0307026	5.93385	0	0	9.0959	3.29072	38.7557	AT5G19530	ACL5	AT5G19530	Encodes a spermine synthase. Required for internode elongation and vascular development, specifically in the mechanism that defines the boundaries between veins and nonvein regions. This mechanism may be mediated by polar auxin transport. Though ACL5 has been shown to function as a spermine synthase in E. coli, an ACL5 knockout has no effect on the endogenous levels of free and conjugated polyami…
AT1G04820	351.849	3.15443	0.609574	5.17481	2.2814e-07	2.96346e-06	31.1527	30.4128	42.6107	183.055	273.13	471.031	AT1G04820	TOR2, TUA4	AT1G04820	Encodes an alpha tubulin isoform that is expressed in roots, leaves and flowers.
AT5G21482	33.6345	3.15438	0.564702	5.58592	2.32467e-08	3.8925e-07	2.96693	13.9392	1.37454	72.7672	53.7485	41.737	AT5G21482	ATCKX5, CKX7	AT5G21482	This gene used to be called AtCKX5. It encodes a protein whose sequence is similar to cytokinin oxidase/dehydrogenase, which catalyzes the degradation of cytokinins.
AT4G27270	6.21889	3.15311	1.25224	2.51798	0.0118031	0.0365302	0	3.8016	0	2.27398	14.2598	18.881	AT4G27270	NA	AT4G27270	NA
AT5G14000	59.5042	3.15205	0.522406	6.03372	1.60227e-09	3.46807e-08	4.45039	7.6032	6.8727	44.3425	38.3918	86.4551	AT5G14000	anac084, NAC084	AT5G14000	NA
AT2G47930	38.5667	3.15116	0.887318	3.55133	0.000383297	0.00206794	0	3.8016	1.37454	13.6439	3.29072	30.8058	AT2G47930	AGP26, ATAGP26	AT2G47930	NA
AT2G29980	1554.21	3.14758	0.50238	6.26533	3.72043e-10	8.85612e-09	143.896	74.7648	60.4798	409.316	591.233	1468.74	AT2G29980	AtFAD3, FAD3	AT2G29980	Endoplasmic reticulum enzyme responsible for the synthesis of 18:3 fatty acids from phospholipids. Uses cytochrome b5 as electron donor.
AT2G26580	72.1455	3.14536	0.56981	5.52002	3.38966e-08	5.43077e-07	5.93385	5.0688	2.74908	32.9726	21.9382	65.5866	AT2G26580	YAB5	AT2G26580	NA
AT3G21750	184.231	3.14416	0.385857	8.1485	3.68459e-16	2.40555e-14	60.822	41.8176	41.2362	243.315	360.883	663.816	AT3G21750	UGT71B1	AT3G21750	Encodes a glucosyltransferase that can attach glucose to a number of hydroxylated phenolic compounds as well as quercetins in vitro
AT1G70280	248.683	3.14412	0.460991	6.82035	9.08164e-12	3.01363e-10	1.48346	5.0688	10.9963	40.9316	40.5856	74.5303	AT1G70280	NA	AT1G70280	NA
AT4G30020	156.7	3.14144	0.564104	5.56891	2.56342e-08	4.25878e-07	11.8677	7.6032	6.8727	27.2877	42.7794	159.992	AT4G30020	NA	AT4G30020	NA
AT5G26280	278.101	3.13523	0.458822	6.83321	8.30379e-12	2.76008e-10	16.3181	27.8784	19.2436	104.603	134.92	319.983	AT5G26280	NA	AT5G26280	NA
AT1G20450	13.6418	3.13206	1.05706	2.96298	0.00304678	0.0119224	2.96693	1.2672	0	14.7808	5.48454	15.8998	AT1G20450	ERD10, LTI29, LTI45	AT1G20450	Encodes a gene induced by low temperature and dehydration. Inhibits e.coli growth while overexpressed. Belongs to the dehydrin protein family, which contains highly conserved stretches of 7-17 residues that are repetitively scattered in their sequences, the K-, S-, Y- and lysine rich segments. LTI29 and LTI30 double overexpressors confer cold tolerance. Localized to membranes and cytoplasm.
AT2G10930	9.32992	3.12909	1.06069	2.95006	0.00317717	0.012322	0	2.5344	1.37454	4.54795	9.87217	20.8685	AT2G10930	NA	AT2G10930	NA
AT4G30810	1964.8	3.11958	0.425763	7.32703	2.35306e-13	9.92893e-12	100.876	139.392	98.9669	476.398	730.541	1743.01	AT4G30810	scpl29	AT4G30810	NA
AT1G76790	549.681	3.11803	0.532182	5.85896	4.65786e-09	9.10806e-08	7.41732	27.8784	13.7454	85.2741	94.3341	250.422	AT1G76790	IGMT5	AT1G76790	NA
AT1G07897	47.8146	3.11037	0.829188	3.75111	0.000176054	0.00105051	0	5.0688	1.37454	12.5069	6.58145	38.7557	AT1G07897	NA	AT1G07897	NA
AT1G52680	6.09911	3.11021	1.05807	2.93952	0.00328724	0.012668	1.48346	5.0688	0	18.1918	9.87217	29.8121	AT1G52680	NA	AT1G52680	NA
AT1G32190	118.154	3.09881	0.493256	6.28236	3.33464e-10	8.01394e-09	2.96693	3.8016	15.1199	38.6576	55.9423	92.4175	AT1G32190	NA	AT1G32190	NA
AT2G40960	12.1702	3.09786	0.962309	3.2192	0.0012855	0.0057744	2.96693	0	2.74908	6.82193	17.5505	22.856	AT2G40960	NA	AT2G40960	NA
AT2G04910	3.57983	3.09361	1.22724	2.52079	0.0117092	0.0362958	2.96693	1.2672	0	13.6439	9.87217	11.9248	AT2G04910	NA	AT2G04910	NA
AT2G27300	675.569	3.08703	0.817618	3.77563	0.000159601	0.000967601	4.45039	7.6032	5.49816	10.2329	23.0351	116.267	AT2G27300	ANAC040, NTL8	AT2G27300	NA
AT3G23800	357.362	3.08127	0.593681	5.19011	2.10168e-07	2.76404e-06	35.6031	48.1536	17.869	127.343	191.959	541.587	AT3G23800	SBP3	AT3G23800	NA
AT1G11125	36.3574	3.08047	0.709249	4.34328	1.4037e-05	0.000116451	0	5.0688	2.74908	9.0959	30.7134	28.8184	AT1G11125	NA	AT1G11125	NA
AT1G27140	26.7771	3.07512	0.728667	4.2202	2.44081e-05	0.000188376	4.45039	5.0688	0	13.6439	19.7443	46.7056	AT1G27140	ATGSTU14, GST13, GSTU14	AT1G27140	Encodes glutathione transferase belonging to the tau class of GSTs. Naming convention according to Wagner et al. (2002).
AT3G06640	238.226	3.07226	0.337609	9.10004	9.02952e-20	9.66717e-18	10.3842	45.6192	59.1052	258.096	299.456	418.363	AT3G06640	NA	AT3G06640	NA
AT1G67740	51.4606	3.07028	0.70559	4.35136	1.35294e-05	0.000112612	5.93385	6.336	8.24724	23.8767	31.8103	116.267	AT1G67740	PSBY, YCF32	AT1G67740	PsbY precursor (psbY) mRNA. This single nuclear gene is imported into the chloroplasts where it is processed into two integral membrane proteins with identical topology (PsbY-1 and PsbY-2). The protein appears to bind manganese but its role is not well understood.
AT2G27385	34.0053	3.06985	0.561038	5.47174	4.45648e-08	6.96191e-07	10.3842	8.8704	1.37454	52.3014	52.6516	67.5741	AT2G27385	NA	AT2G27385	NA
AT2G40205	11.1678	3.06942	1.20281	2.55188	0.0107144	0.0337442	1.48346	0	1.37454	4.54795	4.38763	13.9123	AT2G40205	NA	AT2G40205	NA
AT5G28770	16.5559	3.06831	0.983146	3.12091	0.00180293	0.00766083	0	0	4.12362	18.1918	5.48454	10.9311	AT5G28770	AtbZIP63, BZO2H3	AT5G28770	bZIP protein BZO2H3 mRNA, partial cds
AT1G76180	176.895	3.06793	0.42076	7.2914	3.06746e-13	1.26765e-11	45.9874	83.6352	54.9816	407.042	442.054	702.572	AT1G76180	ERD14	AT1G76180	Encodes a dehydrin protein whose expression is induced early on in response to dehydration stress. This gene's expression to cold occurs in two waves, with early induction occurring within 1 h and secondary induction occurring 5 h after the beginning of cold stress. Expression is also induced in response to ABA but not in response to 2,4-D, BA, and GA3. ERD14 protein is capable of binding Ca2+, e…
AT2G37260	16.8815	3.06726	0.863368	3.55267	0.000381345	0.00205908	5.93385	1.2672	1.37454	9.0959	19.7443	40.7432	AT2G37260	ATWRKY44, DSL1, TTG2, WRKY44	AT2G37260	Encodes a protein similar to WRKY transcription factors that is expressed in the seed integument and endosperm. Mutants are defective in proanthocyanidin synthesis and seed mucilate deposition. Seeds are yellow colored. Seed size is also affected; seeds are reduced in size but only when the mutant allele is transmitted through the female parent.Loss of function alleles are associated with a reduc…
AT4G17340	5.76892	3.06215	0.981404	3.12018	0.00180742	0.00767504	4.45039	0	1.37454	9.0959	16.4536	20.8685	AT4G17340	DELTA-TIP2, TIP2;2	AT4G17340	NA
AT1G29071	6.32483	3.05842	1.28121	2.38713	0.0169803	0.0490964	1.48346	1.2672	0	9.0959	9.87217	3.97495	AT1G29071	NA	AT1G29071	NA
AT1G49430	136.811	3.04797	1.06816	2.85348	0.00432427	0.0159704	2.96693	1.2672	2.74908	1.13699	10.9691	44.7182	AT1G49430	LACS2, LRD2	AT1G49430	Encodes a long chain acyl-CoA synthetase that catalyzes the synthesis of omega-hydroxy fatty acyl-CoA intermediates in the pathway to cutin synthesis. Required for repression of lateral root formation.
AT2G41340	64.8524	3.0479	0.489318	6.22888	4.69783e-10	1.10385e-08	13.3512	12.672	9.62178	47.7535	92.1403	154.029	AT2G41340	RPB5D	AT2G41340	NRPE5-like protein of unknown function; homologous to budding yeast RPB5
AT3G06435	13.6599	3.03755	1.14554	2.65164	0.0080103	0.0266873	0	0	2.74908	4.54795	10.9691	6.95616	AT3G06435	NA	AT3G06435	NA
AT5G67060	56.8304	3.03406	1.10718	2.74036	0.00613715	0.0213073	0	1.2672	1.37454	6.82193	4.38763	10.9311	AT5G67060	HEC1	AT5G67060	NA
AT1G10200	109.252	3.03255	0.477813	6.34673	2.19941e-10	5.52416e-09	13.3512	16.4736	10.9963	64.8083	86.6557	182.848	AT1G10200	AtWLIM1, WLIM1	AT1G10200	NA
AT5G43160	14.7657	3.02552	1.12915	2.67946	0.00737403	0.0249448	2.96693	0	0	4.54795	8.77527	8.94363	AT5G43160	QWRF9	AT5G43160	NA
AT5G51174	37.5462	3.01871	1.03544	2.91538	0.0035526	0.0135056	0	3.8016	0	0	19.7443	12.9186	AT5G51174	NA	AT5G51174	NA
AT1G66350	44.1941	3.01663	0.904122	3.33653	0.000848321	0.00407939	1.48346	1.2672	1.37454	11.3699	10.9691	10.9311	AT1G66350	RGL, RGL1	AT1G66350	Negative regulator of GA responses, member of GRAS family of transcription factors. Also belongs to the DELLA proteins that restrain the cell proliferation and expansion that drives plant growth. RGL1 may be involved in reducing ROS accumulation in response to stress by up-regulating the transcription of superoxide dismutases. Rapidly degraded in response to GA. Involved in flower and fruit devel…
AT4G00820	149.114	3.01341	0.579805	5.19728	2.02229e-07	2.67015e-06	7.41732	7.6032	0	15.9178	36.198	68.5679	AT4G00820	iqd17	AT4G00820	NA
AT1G35320	62.6674	3.01223	0.724505	4.15764	3.21558e-05	0.000240754	2.96693	3.8016	0	10.2329	16.4536	27.8246	AT1G35320	NA	AT1G35320	NA
AT1G32860	183.646	3.00101	0.475653	6.30924	2.80409e-10	6.87071e-09	17.8016	73.4976	41.2362	177.37	336.751	552.518	AT1G32860	NA	AT1G32860	NA
AT1G80080	87.2676	3.00009	0.487453	6.15461	7.52602e-10	1.72196e-08	10.3842	2.5344	6.8727	32.9726	46.0701	74.5303	AT1G80080	AtRLP17, TMM	AT1G80080	Encodes a transmembrane leucine-repeat containing receptor-like protein that is expressed in proliferative postprotodermal cells. Recessive mutation leads to disruption of asymmetric cell division during stomata development.
AT5G20270	75.4144	2.99865	0.930171	3.22376	0.00126519	0.00569849	2.96693	0	1.37454	4.54795	13.1629	14.9061	AT5G20270	HHP1	AT5G20270	heptahelical transmembrane protein homologous to human adiponectin receptors and progestin receptors
AT2G20875	6.39843	2.98785	1.12384	2.65862	0.00784608	0.0262361	0	0	4.12362	6.82193	8.77527	16.8935	AT2G20875	atEPF1, EPF1	AT2G20875	Encodes a secretory peptide EPF1 involved in stomatal development. EPF1 is related to EPF2 which controls asymmetric cell divisions during stomatal devlopment.
AT1G26920	70.2651	2.98596	0.367125	8.13335	4.17593e-16	2.70868e-14	8.90078	17.7408	16.4945	114.836	104.206	126.205	AT1G26920	NA	AT1G26920	NA
AT1G75710	55.2037	2.98522	0.589508	5.06392	4.10723e-07	5.03802e-06	8.90078	6.336	4.12362	25.0137	61.4269	65.5866	AT1G75710	NA	AT1G75710	NA
AT4G15210	23.4721	2.98497	0.60848	4.90561	9.31365e-07	1.0452e-05	4.45039	13.9392	6.8727	31.8357	82.2681	88.4426	AT4G15210	AT-BETA-AMY, ATBETA-AMY, BAM5, BMY1, RAM1	AT4G15210	cytosolic beta-amylase expressed in rosette leaves and inducible by sugar. RAM1 mutants have reduced beta amylase in leaves and stems.
AT3G63200	115.717	2.98392	0.404925	7.36908	1.7181e-13	7.40556e-12	10.3842	12.672	17.869	67.0823	97.6248	158.998	AT3G63200	PLA, PLP9	AT3G63200	NA
AT3G19820	1738.61	2.98082	0.379241	7.85995	3.84283e-15	2.18812e-13	215.102	330.739	251.541	1110.84	1757.25	3429.39	AT3G19820	CBB1, DIM, DIM1, DWF1, EVE1	AT3G19820	Involved in the conversion of the early brassinosteroid precursor 24-methylenecholesterol to campesterol. Brassinosteroids affect cellular elongation. Mutants have dwarf phenotype. DWF1 is a Ca2+-dependent calmodulin-binding protein.
AT5G62710	53.1886	2.97676	0.613353	4.85325	1.21454e-06	1.32227e-05	4.45039	10.1376	8.24724	23.8767	42.7794	114.28	AT5G62710	NA	AT5G62710	NA
AT1G04250	12.729	2.97233	1.1538	2.57612	0.00999156	0.0319548	0	1.2672	2.74908	15.9178	2.19382	13.9123	AT1G04250	AtIAA17, AXR3, IAA17	AT1G04250	Transcription regulator acting as repressor of auxin-inducible gene expression. Auxin-inducible AUX/IAA gene. Short-lived nuclear protein with four conserved domains. Domain III has homology to beta alpha alpha dimerization and DNA binding domains. Involved in auxin signaling. Auxin induces the degradation of the protein in a dosage-dependent manner in a process mediated by AtRac1. Auxin induced …
AT5G49100	79.58	2.96507	0.610863	4.85391	1.21053e-06	1.31934e-05	2.96693	10.1376	10.9963	23.8767	40.5856	125.211	AT5G49100	NA	AT5G49100	NA
AT1G45130	20.3206	2.95962	0.990822	2.98703	0.00281702	0.0111805	4.45039	3.8016	0	6.82193	25.2289	31.7996	AT1G45130	AtBGAL5, BGAL5	AT1G45130	NA
AT5G11160	109.361	2.95106	0.388937	7.58752	3.26095e-14	1.57872e-12	14.8346	8.8704	6.8727	95.507	52.6516	85.4614	AT5G11160	APT5	AT5G11160	NA
AT1G21050	165.862	2.94867	0.264627	11.1427	7.77074e-29	2.16318e-26	11.8677	34.2144	30.2399	167.137	221.575	209.679	AT1G21050	NA	AT1G21050	NA
AT5G27290	5.60428	2.94808	1.13502	2.59738	0.00939392	0.0303672	0	1.2672	4.12362	23.8767	15.3567	2.98121	AT5G27290	NA	AT5G27290	NA
AT5G57350	102.914	2.94385	0.448681	6.56112	5.34068e-11	1.5205e-09	17.8016	10.1376	10.9963	48.8905	94.3341	153.035	AT5G57350	AHA3, ATAHA3, HA3	AT5G57350	member of Plasma membrane H+-ATPase family
AT1G17200	481.538	2.9431	0.312629	9.41404	4.77441e-21	6.17378e-19	34.1197	67.1616	31.6144	263.781	246.804	517.737	AT1G17200	CASPL2A1	AT1G17200	NA
AT5G11210	4.0639	2.93416	1.21258	2.41977	0.0155305	0.0456272	1.48346	2.5344	1.37454	22.7398	10.9691	7.9499	AT5G11210	ATGLR2.5, GLR2.5	AT5G11210	member of Putative ligand-gated ion channel subunit family
AT5G12250	186.138	2.92643	0.473285	6.18322	6.28065e-10	1.45361e-08	13.3512	46.8864	16.4945	101.192	162.342	324.952	AT5G12250	TUB6	AT5G12250	Encodes a beta-tubulin. Expression of TUB6 has been shown to decrease in response to cold treatment.
AT4G14280	9.57246	2.92566	0.837605	3.49288	0.000477834	0.00249212	1.48346	8.8704	2.74908	40.9316	34.0042	26.8309	AT4G14280	NA	AT4G14280	NA
AT4G37650	45.1839	2.92263	0.876482	3.3345	0.00085454	0.00409554	0	5.0688	0	9.0959	7.67836	23.8497	AT4G37650	EAL1, SGR7, SHR	AT4G37650	Involved in radial organization of the root and shoot axial organs. Essential for normal shoot gravitropism. The protein moves in a highly specific manner from the cells of the stele in which it is synthesized outward. Movement requires sequences within the GRAS and VHIID domains.
AT5G23480	38.037	2.91981	0.582843	5.00961	5.45416e-07	6.49927e-06	4.45039	7.6032	4.12362	28.4247	24.132	70.5553	AT5G23480	NA	AT5G23480	NA
AT1G68400	210.992	2.91591	0.442647	6.58745	4.47448e-11	1.29039e-09	10.3842	20.2752	19.2436	48.8905	122.854	206.697	AT1G68400	NA	AT1G68400	NA
AT1G79060	45.8601	2.89755	0.636592	4.55167	5.32228e-06	4.96835e-05	0	11.4048	1.37454	21.6028	26.3258	51.6743	AT1G79060	NA	AT1G79060	NA
AT3G26932	350.401	2.89719	0.234602	12.3494	4.90765e-35	2.28754e-32	43.0204	49.4208	59.1052	284.247	353.204	491.9	AT3G26932	DRB3	AT3G26932	NA
AT4G33820	5.19031	2.89669	1.08559	2.66831	0.00762336	0.0256325	4.45039	0	0	12.5069	8.77527	9.93737	AT4G33820	NA	AT4G33820	NA
AT1G62570	264.508	2.89628	0.459686	6.30057	2.96558e-10	7.23105e-09	7.41732	24.0768	6.8727	62.5343	74.5898	153.035	AT1G62570	FMO	AT1G62570	belongs to the flavin-monooxygenase (FMO) family, encodes a glucosinolate S-oxygenase that catalyzes the conversion of methylthioalkyl glucosinolates to methylsulfinylalkyl glucosinolates
AT2G42660	72.8713	2.89591	0.662884	4.36866	1.25014e-05	0.000105015	1.48346	7.6032	0	10.2329	24.132	35.7745	AT2G42660	NA	AT2G42660	NA
AT4G10380	610.288	2.89316	0.368472	7.85177	4.10191e-15	2.3094e-13	44.5039	41.8176	46.7344	177.37	228.157	581.336	AT4G10380	AtNIP5;1, NIP5;1, NLM6, NLM8	AT4G10380	Boric acid channel. Essential for efficient boron uptake and plant development under boron limitation. Also functions in arsenite transport and tolerance. Localized preferentially in outer membrane domains of root cells.
AT4G21780	8.93898	2.89238	0.765653	3.77766	0.000158311	0.000961813	4.45039	3.8016	1.37454	26.1507	26.3258	18.881	AT4G21780	NA	AT4G21780	NA
AT3G46500	9.67737	2.88572	0.788448	3.66	0.000252214	0.00144144	1.48346	3.8016	2.74908	26.1507	16.4536	17.8873	AT3G46500	NA	AT3G46500	NA
AT3G02820	16.1301	2.87651	0.999606	2.87765	0.00400655	0.0149708	0	3.8016	4.12362	6.82193	17.5505	34.7808	AT3G02820	NA	AT3G02820	NA
AT5G44210	14.2165	2.87587	0.836435	3.43825	0.000585492	0.00298601	2.96693	1.2672	2.74908	11.3699	25.2289	13.9123	AT5G44210	ATERF-9, ATERF9, ERF9	AT5G44210	encodes a member of the ERF (ethylene response factor) subfamily B-1 of ERF/AP2 transcription factor family (ATERF-9). The protein contains one AP2 domain. There are 15 members in this subfamily including ATERF-3, ATERF-4, ATERF-7, and leafy petiole.
AT1G79580	50.7765	2.87509	0.481341	5.97308	2.32819e-09	4.85576e-08	5.93385	13.9392	8.24724	40.9316	59.233	108.317	AT1G79580	ANAC033, SMB, URP7	AT1G79580	NAC-domain protein. Involved in root cap development. Involved in a regulatory feedback loop with FEZ. FEZ activates SMB in hte root cap daughter cells soon after division, and SMB in turn represses FEZ expression in these cells, thereby preventing further stem cell divisions.
AT1G62580	78.867	2.87213	1.1238	2.55573	0.0105966	0.033452	0	0	2.74908	4.54795	0	14.9061	AT1G62580	NOGC1	AT1G62580	NA
AT3G26740	287.331	2.86607	0.328995	8.7116	2.99619e-18	2.69295e-16	65.2724	134.323	129.207	579.864	697.634	1124.91	AT3G26740	CCL	AT3G26740	transcripts are differentially regulated at the level of mRNA stability at different times of day controlled by the circadian clock. mRNAs are targets of the mRNA degradation pathway mediated by the downstream (DST) instability determinant.
AT3G57780	273.127	2.86037	0.364279	7.85212	4.09055e-15	2.3094e-13	23.7354	11.4048	6.8727	67.0823	103.109	129.186	AT3G57780	NA	AT3G57780	NA
AT5G19520	1062.87	2.86025	0.437274	6.54109	6.10708e-11	1.71195e-09	60.822	76.032	87.9706	237.63	433.279	961.937	AT5G19520	ATMSL9, MSL9	AT5G19520	NA
AT5G02550	12.0001	2.85523	1.0125	2.81999	0.00480254	0.0174316	0	1.2672	2.74908	6.82193	7.67836	14.9061	AT5G02550	NA	AT5G02550	NA
AT5G43700	309.163	2.84761	0.249273	11.4237	3.1846e-30	9.25056e-28	47.4708	34.2144	46.7344	272.877	233.641	412.401	AT5G43700	ATAUX2-11, IAA4	AT5G43700	Auxin inducible protein similar to transcription factors.
AT4G29390	189.038	2.84737	0.235142	12.1091	9.44909e-34	3.71349e-31	44.5039	65.8944	38.4871	328.59	308.231	440.225	AT4G29390	NA	AT4G29390	NA
AT3G61550	72.9621	2.84365	0.731373	3.8881	0.000101031	0.000646746	0	1.2672	8.24724	12.5069	9.87217	45.7119	AT3G61550	ATL68	AT3G61550	NA
AT2G32720	158.02	2.84214	0.401098	7.08588	1.38162e-12	5.20523e-11	16.3181	21.5424	8.24724	83.0001	74.5898	173.904	AT2G32720	ATCB5-B, B5, CB5-B, CYTB5-D	AT2G32720	member of Cytochromes b5
AT2G26010	5.48392	2.83319	1.05909	2.67512	0.00747028	0.0252235	2.96693	1.2672	2.74908	20.4658	21.9382	6.95616	AT2G26010	PDF1.3	AT2G26010	Predicted to encode a PR (pathogenesis-related) protein. Belongs to the plant defensin (PDF) family with the following members: At1g75830/PDF1.1, At5g44420/PDF1.2a, At2g26020/PDF1.2b, At5g44430/PDF1.2c, At2g26010/PDF1.3, At1g19610/PDF1.4, At1g55010/PDF1.5, At2g02120/PDF2.1, At2g02100/PDF2.2, At2g02130/PDF2.3, At1g61070/PDF2.4, At5g63660/PDF2.5, At2g02140/PDF2.6, At5g38330/PDF3.1 and At4g30070/PDF…
AT2G19170	29.0582	2.83208	0.745083	3.80102	0.000144102	0.000885688	1.48346	1.2672	6.8727	11.3699	20.8413	35.7745	AT2G19170	SLP3	AT2G19170	Encodes a novel subtilisin-like serine protease.
AT5G16390	139.042	2.82661	0.382618	7.38755	1.4956e-13	6.47436e-12	11.8677	15.2064	26.1163	81.8631	109.691	185.829	AT5G16390	BCCP, BCCP-1, BCCP1, CAC1, CAC1-A, CAC1A	AT5G16390	Encodes for the biotin carboxyl-carrier subunit of the multi-enzyme plastidial acetyl-coenzyme A carboxylase complex.
AT4G12620	17.9763	2.81979	1.03334	2.7288	0.00635643	0.0219696	4.45039	0	0	5.68494	6.58145	16.8935	AT4G12620	ATORC1B, ORC1B, UNE13	AT4G12620	Origin Recognition Complex subunit 1b. Involved in the initiation of DNA replication. Regulated transcriptionally during cell cycle, peaking at G1/S-phase. Target of E2F/DF family of transcription factors. Interacts with ORC2 and ORC5. Highly expressed in proliferating cells. Expression levels are independent of light regime.
AT5G57180	312.6	2.81573	0.379067	7.42804	1.10217e-13	4.86581e-12	17.8016	17.7408	26.1163	83.0001	106.4	243.466	AT5G57180	CIA2	AT5G57180	Transcription regulator responsible for specific upregulation of the translocon genes atToc33 and atToc75 in leaves. Involved in protein import into chloroplast.
AT3G21090	872.175	2.81523	0.325767	8.64185	5.531e-18	4.75784e-16	66.7559	108.979	100.341	309.261	582.458	1054.35	AT3G21090	ABCG15	AT3G21090	NA
AT5G56850	7.43707	2.80542	1.05673	2.65481	0.00793532	0.0264771	4.45039	2.5344	0	6.82193	16.4536	24.8434	AT5G56850	NA	AT5G56850	NA
AT2G25220	76.2227	2.79285	0.590565	4.72911	2.25505e-06	2.29315e-05	1.48346	7.6032	5.49816	20.4658	18.6474	63.5992	AT2G25220	NA	AT2G25220	NA
AT3G55240	14.3766	2.78723	0.939434	2.96692	0.00300798	0.0118098	8.90078	0	0	32.9726	10.9691	14.9061	AT3G55240	NA	AT3G55240	Overexpression leads to PEL (Pseudo-Etiolation in Light) phenotype.
AT1G56230	50.9272	2.7863	0.669407	4.16233	3.15015e-05	0.000236473	0	6.336	4.12362	21.6028	10.9691	41.737	AT1G56230	NA	AT1G56230	NA
AT3G24240	1290.92	2.78457	0.263399	10.5717	4.03268e-26	8.41948e-24	60.822	120.384	67.3525	403.631	500.19	816.852	AT3G24240	RGFR1, RGI1	AT3G24240	NA
AT1G23080	170.461	2.78282	0.548092	5.07729	3.82856e-07	4.72802e-06	7.41732	5.0688	4.12362	14.7808	35.1011	62.6054	AT1G23080	ATPIN7, PIN7	AT1G23080	Encodes a novel component of auxin efflux that is located apically in the basal cell and is involved during embryogenesis in setting up the apical-basal axis in the embryo. It is also involved in pattern specification during root development. In roots, it is expressed at lateral and basal membranes of provascular cells in the meristem and elongation zone, whereas in the columella cells it coincid…
AT5G25460	6707.47	2.78235	0.423942	6.56304	5.27227e-11	1.50316e-09	169.115	267.379	204.806	815.22	1016.83	2581.73	AT5G25460	DGR2	AT5G25460	NA
AT3G20790	24.4901	2.78065	0.724261	3.8393	0.000123387	0.000771142	7.41732	6.336	4.12362	19.3288	26.3258	76.5177	AT3G20790	NA	AT3G20790	NA
AT1G76160	574.982	2.77623	0.534346	5.19557	2.04098e-07	2.69128e-06	7.41732	26.6112	21.9926	85.2741	96.5279	204.71	AT1G76160	sks5	AT1G76160	NA
AT1G34010	82.2759	2.77399	0.466509	5.94628	2.74302e-09	5.61003e-08	5.93385	7.6032	8.24724	37.5206	44.9732	66.5804	AT1G34010	NA	AT1G34010	NA
AT3G61490	24.772	2.77342	0.847986	3.27059	0.00107322	0.00496434	5.93385	2.5344	6.8727	21.6028	18.6474	63.5992	AT3G61490	NA	AT3G61490	NA
AT5G57560	128.612	2.77033	0.476105	5.81873	5.92952e-09	1.1351e-07	37.0866	45.6192	21.9926	106.877	262.161	345.82	AT5G57560	AtXTH22, TCH4, XTH22	AT5G57560	Encodes a cell wall-modifying enzyme, rapidly upregulated in response to environmental stimuli
AT5G59510	21.0669	2.76943	0.629529	4.39921	1.08645e-05	9.29792e-05	5.93385	3.8016	1.37454	18.1918	30.7134	25.8372	AT5G59510	DVL18, RTFL5	AT5G59510	NA
AT5G14880	46.1427	2.76788	0.531757	5.20517	1.93823e-07	2.57613e-06	7.41732	5.0688	10.9963	34.1096	44.9732	79.499	AT5G14880	KUP8	AT5G14880	NA
AT5G27930	65.3079	2.76245	0.738816	3.73902	0.000184736	0.00109579	0	10.1376	0	9.0959	26.3258	36.7683	AT5G27930	EGR2	AT5G27930	NA
AT1G70080	125.775	2.75943	0.403396	6.8405	7.89159e-12	2.62743e-10	5.93385	13.9392	4.12362	59.1234	52.6516	54.6555	AT1G70080	TPS6	AT1G70080	NA
AT5G10150	17.2965	2.75845	0.824626	3.3451	0.000822543	0.00397834	1.48346	0	5.49816	13.6439	24.132	8.94363	AT5G10150	SOK2	AT5G10150	NA
AT2G45400	87.2217	2.7578	0.468689	5.88407	4.00308e-09	7.9914e-08	4.45039	7.6032	5.49816	30.6987	34.0042	54.6555	AT2G45400	BEN1	AT2G45400	involved in the regulation of brassinosteroid metabolic pathway
AT5G08050	24.3605	2.75265	0.774316	3.55494	0.000378068	0.00204414	4.45039	3.8016	0	11.3699	23.0351	20.8685	AT5G08050	RIQ1	AT5G08050	NA
AT3G48440	227.666	2.752	0.447307	6.15238	7.63284e-10	1.74243e-08	0	11.4048	10.9963	29.5617	52.6516	72.5428	AT3G48440	NA	AT3G48440	NA
AT1G08115	10.5922	2.73539	0.728775	3.75341	0.000174445	0.00104215	5.93385	2.5344	6.8727	37.5206	32.9072	30.8058	AT1G08115	NA	AT1G08115	NA
AT2G06850	53.6623	2.7335	1.12443	2.431	0.0150571	0.0444986	0	3.8016	0	2.27398	3.29072	20.8685	AT2G06850	EXGT-A1, EXT, XTH4	AT2G06850	endoxyloglucan transferase (EXGT-A1) gene
AT1G08500	99.8981	2.72993	0.492795	5.5397	3.02998e-08	4.90153e-07	5.93385	7.6032	12.3709	38.6576	40.5856	92.4175	AT1G08500	AtENODL18, ENODL18	AT1G08500	NA
AT4G37890	134.77	2.72469	0.265585	10.2592	1.07573e-24	1.99637e-22	45.9874	44.352	54.9816	270.603	274.227	414.388	AT4G37890	EDA40	AT4G37890	NA
AT5G58550	101.139	2.72453	0.444947	6.12327	9.16733e-10	2.06219e-08	1.48346	19.008	9.62178	51.1645	54.8454	98.38	AT5G58550	EOL2	AT5G58550	Encodes a paralog of ETO1, which is a negative regulator of ACS5 (a key enzyme in ethylene biosynthesis pathway). EOL2 also interacts with and inhibits the activity of ACS5.
AT1G80280	33.2514	2.71931	0.796045	3.41603	0.000635408	0.00320712	0	5.0688	4.12362	9.0959	10.9691	41.737	AT1G80280	NA	AT1G80280	NA
AT1G20340	85.1932	2.71762	0.584359	4.6506	3.30963e-06	3.23112e-05	5.93385	13.9392	32.989	70.4932	81.1712	196.76	AT1G20340	DRT112, PETE2	AT1G20340	recombination and DNA-damage resistance protein (DRT112) One of two Arabidopsis plastocyanin genes. Predominant form, expressed 10x higher than PETE1. PETE2 is thought to be post-transcriptionally regulated via copper accumulation and is involved in copper homeostasis.
AT2G34320	8.414	2.71659	0.965246	2.81441	0.00488673	0.01767	1.48346	2.5344	1.37454	9.0959	7.67836	18.881	AT2G34320	NA	AT2G34320	NA
AT4G20940	98.3951	2.71355	0.627639	4.32343	1.53623e-05	0.000125727	10.3842	0	1.37454	13.6439	18.6474	39.7495	AT4G20940	GHR1	AT4G20940	NA
AT3G54560	21.8781	2.71085	1.0188	2.66084	0.00779459	0.0260856	0	8.8704	0	18.1918	13.1629	28.8184	AT3G54560	H2A.Z, HTA11	AT3G54560	Encodes HTA11, a histone H2A protein.
AT1G11120	55.2606	2.70638	0.527363	5.13192	2.868e-07	3.65329e-06	8.90078	2.5344	2.74908	23.8767	29.6165	35.7745	AT1G11120	DEG23	AT1G11120	NA
AT2G38120	243.95	2.70546	0.447446	6.04645	1.48076e-09	3.21898e-08	10.3842	10.1376	6.8727	34.1096	46.0701	97.3862	AT2G38120	AtAUX1, AUX1, MAP1, PIR1, WAV5	AT2G38120	Encodes an auxin influx transporter. AUX1 resides at the apical plasma membrane of protophloem cells and at highly dynamic subpopulations of Golgi apparatus and endosomes in all cell types. AUX1 action in the lateral root cap and/or epidermal cells influences lateral root initiation and positioning.
AT1G60600	62.1089	2.70543	0.618011	4.37764	1.19972e-05	0.000101161	1.48346	6.336	12.3709	25.0137	34.0042	73.5365	AT1G60600	ABC4	AT1G60600	Encodes a protein similar to 1,4-dihydroxy-2-naphthoic acid phytyltransferase involved in phylloquinone and plastoquinone biosynthesis. Mutants are pale green and heterotrophic with defects in photosynthetic electron transport.
AT3G23430	36.0517	2.69509	0.474294	5.68233	1.32875e-08	2.34437e-07	8.90078	7.6032	12.3709	59.1234	52.6516	74.5303	AT3G23430	ATPHO1, PHO1	AT3G23430	mutant is deficient in the transfer of phosphate from root epidermal and cortical cells to the xylem. encodes protein with the mainly hydrophilic N-terminal and the C-terminal containing 6 potential membrane-spanning domains.
AT5G57130	63.3878	2.69346	0.465217	5.7897	7.05135e-09	1.32954e-07	8.90078	3.8016	10.9963	34.1096	43.8763	72.5428	AT5G57130	SMXL5	AT5G57130	NA
AT1G13170	59.9545	2.69324	0.649081	4.14931	3.33474e-05	0.000248654	8.90078	6.336	6.8727	15.9178	39.4887	86.4551	AT1G13170	ORP1D	AT1G13170	NA
AT1G06180	31.4492	2.68723	0.483815	5.55426	2.78792e-08	4.55405e-07	8.90078	2.5344	10.9963	51.1645	48.264	42.7307	AT1G06180	ATMYB13, ATMYBLFGN, MYB13	AT1G06180	member of MYB3R- and R2R3- type MYB- encoding genes
AT2G24170	8.34938	2.67913	1.01998	2.62664	0.00862318	0.0283186	0	2.5344	4.12362	4.54795	20.8413	17.8873	AT2G24170	NA	AT2G24170	NA
AT2G03760	39.1685	2.67852	0.623771	4.29408	1.75423e-05	0.000141261	2.96693	10.1376	9.62178	14.7808	39.4887	92.4175	AT2G03760	AtSOT1, AtSOT12, ATST1, AtSULT202A1, RAR047, SOT12, ST, ST1, SULT202A1	AT2G03760	Encodes a brassinosteroid sulfotransferase. In vitro experiements show that this enzyme has a preference for 24-epibrassinosteroids, particularly 24-epicathasterone, but does not act on castasterone and brassinolide. It is differentially expressed during development, being more abundant in young seedlings and actively growing cell cultures. Expression is induced in response to salicylic acid and …
AT1G26330	13.8528	2.67785	1.11553	2.40051	0.0163721	0.0477164	0	0	4.12362	2.27398	10.9691	12.9186	AT1G26330	NA	AT1G26330	NA
AT4G28050	54.4138	2.67108	0.544653	4.90418	9.38164e-07	1.05107e-05	11.8677	3.8016	5.49816	40.9316	25.2289	65.5866	AT4G28050	TET7	AT4G28050	Member of TETRASPANIN family
AT1G61230	5.97797	2.66518	1.06828	2.49484	0.0126014	0.038531	2.96693	0	1.37454	5.68494	6.58145	13.9123	AT1G61230	NA	AT1G61230	NA
AT2G35585	14.7694	2.66487	0.9096	2.92972	0.00339272	0.012997	0	5.0688	0	10.2329	12.066	11.9248	AT2G35585	NA	AT2G35585	NA
AT1G01620	243.274	2.66376	0.27612	9.64712	5.05573e-22	7.08615e-20	48.9543	74.7648	70.1015	292.206	403.662	535.624	AT1G01620	PIP1;3, PIP1C, TMP-B	AT1G01620	a member of the plasma membrane intrinsic protein subfamily PIP1. localizes to the plasma membrane and exhibits water transport activity in Xenopus oocyte. expressed ubiquitously and protein level decreases slightly during leaf development.
AT2G23150	147.22	2.65959	0.481712	5.52113	3.36821e-08	5.40072e-07	11.8677	16.4736	9.62178	34.1096	55.9423	150.054	AT2G23150	ATNRAMP3, NRAMP3	AT2G23150	Encodes a member of the Nramp2 metal transporter family; like its homolog Atnramp4, localized in vacuolar membrane. Seedlings of double mutant, atnramp3-1 atnramp4-1, were arrested at early germination.
AT5G66170	1091.6	2.649	0.163109	16.2407	2.60062e-59	5.79159e-56	283.342	316.8	288.653	1677.06	1674.98	2224.98	AT5G66170	STR18	AT5G66170	Encodes a thiosulfate sulfurtransferase/rhodanese.
AT1G71030	6.61145	2.6469	1.05912	2.49914	0.0124496	0.0382008	2.96693	0	2.74908	10.2329	19.7443	4.96869	AT1G71030	ATMYBL2, MYBL2	AT1G71030	Encodes a putative myb family transcription factor. In contrast to most other myb-like proteins its myb domain consists of a single repeat. A proline-rich region potentially involved in transactivation is found in the C-terminal part of the protein. Its transcript accumulates mainly in leaves.
AT1G61260	96.0154	2.64449	0.915709	2.88791	0.00387805	0.0145449	0	22.8096	9.62178	31.8357	74.5898	98.38	AT1G61260	NA	AT1G61260	NA
AT1G47128	559.007	2.64417	0.262339	10.0792	6.82867e-24	1.15014e-21	77.1401	78.5664	67.3525	476.398	455.217	463.081	AT1G47128	RD21, RD21A	AT1G47128	cysteine proteinase precursor-like protein/ dehydration stress-responsive gene (RD21)
AT5G59080	60.2456	2.64353	0.299055	8.83959	9.60713e-19	9.34737e-17	22.252	26.6112	24.7417	153.493	155.761	152.042	AT5G59080	NA	AT5G59080	NA
AT1G49975	37.4636	2.64324	0.817541	3.23316	0.00122428	0.00554409	5.93385	3.8016	0	13.6439	4.38763	41.737	AT1G49975	NA	AT1G49975	NA
AT4G18460	27.855	2.64295	0.929462	2.84352	0.00446178	0.0163667	0	0	4.12362	6.82193	8.77527	9.93737	AT4G18460	NA	AT4G18460	NA
AT1G62500	45.1182	2.63013	0.749195	3.51061	0.000447077	0.0023612	5.93385	2.5344	0	14.7808	15.3567	20.8685	AT1G62500	DEG27	AT1G62500	NA
AT5G63140	64.1751	2.6288	0.491658	5.34681	8.9517e-08	1.30014e-06	16.3181	6.336	10.9963	32.9726	62.5238	109.311	AT5G63140	ATPAP29, PAP29	AT5G63140	NA
AT1G64970	1088.64	2.62843	0.459845	5.71591	1.0912e-08	1.97213e-07	90.4913	259.776	186.937	607.152	954.31	1763.88	AT1G64970	G-TMT, TMT1, VTE4	AT1G64970	gamma-tocopherol methyltransferase (g-TMT) mRNA, nuclear; mutant has Deficient in alpha and beta tocopherol; Accumulates gamma tocopherol in leaves
AT3G03450	3170.37	2.62746	0.190456	13.7956	2.70774e-43	2.15739e-40	542.948	594.317	637.787	2737.87	3210.65	5020.36	AT3G03450	RGL2	AT3G03450	Encodes a DELLA protein, a member of the GRAS superfamily of putative transcription factors. DELLA proteins restrain the cell proliferation and expansion that drives plant growth. Negative regulator of the response to GA in controlling seed germination. GA triggers the degradation of RGL2 protein in a process blocked by both proteasome inhibitors and serine/threonine phosphatase inhibitors. The p…
AT1G70940	174.416	2.62296	0.404552	6.48361	8.95512e-11	2.42879e-09	10.3842	24.0768	9.62178	47.7535	86.6557	140.117	AT1G70940	ATPIN3, PIN3	AT1G70940	A regulator of auxin efflux and involved in differential growth. PIN3 is expressed in gravity-sensing tissues, with PIN3 protein accumulating predominantly at the lateral cell surface. PIN3 localizes to the plasma membrane and to vesicles. In roots, PIN3 is expressed without pronounced polarity in tiers two and three of the columella cells, at the basal side of vascular cells, and to the lateral …
AT4G11340	227.003	2.62195	0.577926	4.53682	5.71096e-06	5.26275e-05	5.93385	1.2672	5.49816	15.9178	19.7443	39.7495	AT4G11340	NA	AT4G11340	NA
AT3G26742	8.52483	2.61921	0.943346	2.77651	0.00549452	0.0194845	1.48346	3.8016	1.37454	5.68494	23.0351	12.9186	AT3G26742	NA	AT3G26742	NA
AT2G34680	146.158	2.61759	0.514883	5.08386	3.69837e-07	4.58987e-06	20.7685	8.8704	23.3672	38.6576	81.1712	202.722	AT2G34680	AIR9	AT2G34680	isolated from differential screening of a cDNA library from auxin-treated root culture. sequence does not show homology to any known proteins and is predicted to be extracellular.
AT3G24660	103.936	2.61633	0.498123	5.25238	1.50148e-07	2.05983e-06	10.3842	15.2064	30.2399	61.3973	60.3299	220.61	AT3G24660	TMKL1	AT3G24660	member of Receptor kinase-like protein family
AT1G67630	79.1067	2.61176	0.567262	4.60414	4.14164e-06	3.96423e-05	5.93385	5.0688	6.8727	21.6028	23.0351	63.5992	AT1G67630	EMB2814, POLA2	AT1G67630	NA
AT3G05020	45.4057	2.60006	0.492974	5.27423	1.33311e-07	1.84527e-06	5.93385	10.1376	5.49816	27.2877	57.0392	47.6994	AT3G05020	ACP, ACP1, AtACP1	AT3G05020	encodes an acyl carrier protein expressed in leaves, roots, and dry seeds. Protein is not regulated by light.
AT1G80130	42.6809	2.59651	0.384951	6.74505	1.52975e-11	4.78328e-10	19.285	10.1376	9.62178	67.0823	70.2021	95.3988	AT1G80130	NA	AT1G80130	NA
AT1G50900	42.045	2.59257	0.69072	3.75343	0.000174432	0.00104215	8.90078	5.0688	5.49816	17.0548	16.4536	82.4802	AT1G50900	GDC1, LTD	AT1G50900	NA
AT2G23700	51.4478	2.59159	0.515264	5.02964	4.91409e-07	5.92261e-06	13.3512	2.5344	9.62178	28.4247	44.9732	76.5177	AT2G23700	NA	AT2G23700	NA
AT1G53580	367.876	2.58399	0.352424	7.33204	2.26668e-13	9.60489e-12	28.1858	45.6192	48.1089	130.754	184.281	417.37	AT1G53580	ETHE1, GLX2-3, GLY3	AT1G53580	Mononuclear Fe(II)-containing member of the b-lactamase fold superfamily. ETHE1 is homodimeric in solution, exhibits low-level esterase activity, and specifically binds a single Fe(II) atom in the active site.
AT3G09800	38.9477	2.57383	0.617474	4.16831	3.06861e-05	0.000230958	5.93385	10.1376	6.8727	21.6028	34.0042	81.4864	AT3G09800	NA	AT3G09800	NA
AT3G05230	74.1664	2.57273	0.52885	4.86477	1.14588e-06	1.25092e-05	13.3512	3.8016	4.12362	46.6165	23.0351	53.6618	AT3G05230	NA	AT3G05230	NA
AT1G67590	53.7599	2.57046	0.486301	5.28573	1.25206e-07	1.74634e-06	13.3512	8.8704	10.9963	47.7535	38.3918	109.311	AT1G67590	NA	AT1G67590	NA
AT1G60090	1765.1	2.56558	0.241842	10.6085	2.71982e-26	5.73825e-24	45.9874	102.643	87.9706	333.137	456.314	619.098	AT1G60090	BGLU4	AT1G60090	NA
AT4G27720	117.213	2.56475	0.508007	5.04865	4.44941e-07	5.41639e-06	13.3512	7.6032	15.1199	29.5617	51.5547	130.18	AT4G27720	NA	AT4G27720	NA
AT5G50150	19.1763	2.56458	1.00434	2.55351	0.0106644	0.0336027	1.48346	3.8016	0	4.54795	3.29072	23.8497	AT5G50150	LOTR1	AT5G50150	NA
AT5G28080	13.3968	2.56135	0.625501	4.09488	4.22394e-05	0.000305413	4.45039	5.0688	8.24724	37.5206	30.7134	36.7683	AT5G28080	AtWNK9, WNK9	AT5G28080	Encodes a member of the WNK family (9 members in all) of protein kinases, the structural design of which is clearly distinct from those of other known protein kinases, such as receptor-like kinases and mitogen-activated protein kinases.
AT1G54330	19.0865	2.55872	0.819199	3.12344	0.0017875	0.00760817	0	10.1376	0	17.0548	17.5505	27.8246	AT1G54330	ANAC020, NAC020	AT1G54330	NA
AT3G18960	24.1386	2.55796	0.609763	4.19501	2.72864e-05	0.000208264	1.48346	16.4736	6.8727	39.7946	44.9732	64.5929	AT3G18960	NA	AT3G18960	NA
AT2G37120	45.5923	2.55022	0.57899	4.40461	1.05975e-05	9.1122e-05	10.3842	15.2064	6.8727	67.0823	38.3918	85.4614	AT2G37120	NA	AT2G37120	NA
AT5G15050	31.2566	2.5426	0.72761	3.49445	0.000475044	0.00247951	1.48346	3.8016	2.74908	12.5069	10.9691	23.8497	AT5G15050	GlcAT14B	AT5G15050	NA
AT1G05570	763.925	2.53985	0.303267	8.37499	5.52297e-17	4.04004e-15	29.6693	79.8336	60.4798	219.439	274.227	500.843	AT1G05570	ATGSL06, ATGSL6, CALS1, GSL06, GSL6	AT1G05570	Encodes a callose synthase 1 catalytic subunit . Member of Glycosyltransferase Family- 48.
AT3G05430	15.349	2.53529	0.727334	3.48573	0.000490793	0.0025524	0	6.336	1.37454	18.1918	12.066	16.8935	AT3G05430	PDP4	AT3G05430	NA
AT1G50630	28.9157	2.53413	0.557856	4.54263	5.55568e-06	5.14568e-05	5.93385	7.6032	6.8727	43.2055	30.7134	44.7182	AT1G50630	NA	AT1G50630	NA
AT3G20260	46.5257	2.53362	0.592104	4.27902	1.8772e-05	0.000149899	1.48346	16.4736	6.8727	34.1096	36.198	76.5177	AT3G20260	NA	AT3G20260	NA
AT4G16190	30.884	2.53054	0.569287	4.4451	8.78522e-06	7.68192e-05	14.8346	3.8016	9.62178	36.3836	51.5547	72.5428	AT4G16190	NA	AT4G16190	NA
AT2G26440	96.7161	2.52933	0.690899	3.66092	0.000251309	0.0014379	0	5.0688	4.12362	7.95892	18.6474	27.8246	AT2G26440	PME12	AT2G26440	NA
AT5G66260	12.9261	2.52869	0.916999	2.75757	0.00582319	0.0204224	2.96693	2.5344	1.37454	13.6439	10.9691	14.9061	AT5G66260	SAUR11	AT5G66260	NA
AT5G13100	132.31	2.52644	0.594963	4.24638	2.17251e-05	0.000170826	7.41732	3.8016	1.37454	25.0137	12.066	33.7871	AT5G13100	NA	AT5G13100	NA
AT1G13080	747.467	2.52375	0.482387	5.23181	1.67862e-07	2.26869e-06	1.48346	7.6032	5.49816	14.7808	32.9072	37.762	AT1G13080	CYP71B2	AT1G13080	cytochrome P450 monooxygenase
AT2G03505	10.6523	2.51543	0.886846	2.83638	0.00456278	0.0166761	2.96693	2.5344	4.12362	10.2329	6.58145	37.762	AT2G03505	NA	AT2G03505	NA
AT5G06610	25.4066	2.51344	0.976003	2.57524	0.0100172	0.0320163	0	2.5344	1.37454	1.13699	10.9691	10.9311	AT5G06610	BDR1	AT5G06610	NA
AT1G69526	48.5704	2.5129	0.61443	4.0898	4.31745e-05	0.000311387	8.90078	17.7408	8.24724	39.7946	35.1011	125.211	AT1G69526	NA	AT1G69526	NA
AT3G49250	48.3886	2.50866	0.629517	3.98505	6.7465e-05	0.00045665	0	6.336	5.49816	10.2329	21.9382	36.7683	AT3G49250	DMS3, IDN1	AT3G49250	Similar to hinge-domain region of structural maintenance of chromosomes (SMC)proteins.Putative chromosome architecture protein that can potentialy link nucleic acids in facilitating an RNA1-mediated epigenetic modification involving secondary siRNA and spreading of DNA methylation.
AT5G43830	196.315	2.50668	0.442807	5.66088	1.50594e-08	2.61557e-07	19.285	31.68	20.6181	70.4932	100.916	236.509	AT5G43830	NA	AT5G43830	NA
AT2G22770	61.8052	2.5061	0.761188	3.29236	0.000993517	0.00464607	1.48346	3.8016	6.8727	4.54795	21.9382	42.7307	AT2G22770	NAI1	AT2G22770	regulates the development of ER bodies. also involves in response to the endophytic fungus Piriformospora indica.
AT3G07320	68.0008	2.50457	0.714268	3.50649	0.000454063	0.00238991	7.41732	10.1376	0	22.7398	17.5505	59.6242	AT3G07320	NA	AT3G07320	NA
AT5G09660	78.2835	2.50184	0.496658	5.03735	4.72033e-07	5.71314e-06	10.3842	32.9472	16.4945	71.6302	115.175	155.023	AT5G09660	PMDH2	AT5G09660	encodes a microbody NAD-dependent malate dehydrogenase encodes an peroxisomal NAD-malate dehydrogenase that is involved in fatty acid beta-oxidation through providing NAD to the process of converting fatty acyl CoA to acetyl CoA.
AT5G64460	43.5171	2.50152	0.565093	4.42674	9.56683e-06	8.28145e-05	7.41732	7.6032	5.49816	25.0137	23.0351	67.5741	AT5G64460	NA	AT5G64460	NA
AT1G15260	110.659	2.50062	0.420402	5.94816	2.7117e-09	5.55731e-08	7.41732	19.008	6.8727	38.6576	57.0392	95.3988	AT1G15260	NA	AT1G15260	NA
AT4G27260	192.295	2.4999	0.313287	7.9796	1.46813e-15	8.86315e-14	45.9874	54.4896	61.8543	247.863	388.305	283.215	AT4G27260	GH3.5, WES1	AT4G27260	encodes an IAA-amido synthase that conjugates Asp and other amino acids to auxin in vitro. Lines carrying insertions in this gene are hypersensitive to auxin.
AT2G44580	24.8565	2.49983	0.883712	2.82878	0.00467254	0.0170307	4.45039	1.2672	1.37454	13.6439	4.38763	20.8685	AT2G44580	NA	AT2G44580	NA
AT4G01610	7926.12	2.49922	0.227159	11.0021	3.73497e-28	9.47596e-26	1277.26	1766.48	1425.4	5683.8	6950.01	12637.4	AT4G01610	AtcathB3	AT4G01610	NA
AT1G19710	18.175	2.49887	0.814052	3.06966	0.00214299	0.00884879	2.96693	1.2672	2.74908	18.1918	9.87217	10.9311	AT1G19710	NA	AT1G19710	NA
AT5G15530	20.7587	2.49755	0.639979	3.90256	9.51824e-05	0.000613619	10.3842	2.5344	8.24724	31.8357	34.0042	51.6743	AT5G15530	BCCP2, CAC1-B	AT5G15530	biotin carboxyl carrier protein isoform 2 (BCCP2) mRNA,
AT3G46550	48.4577	2.49736	0.576894	4.32897	1.49807e-05	0.000123107	7.41732	7.6032	4.12362	29.5617	16.4536	61.6117	AT3G46550	FLA4, SOS5	AT3G46550	Isolated in a screen for salt hypersensitive mutants. Mutants have thinner cell walls, abnormal siliques and root growth is inhibited under salt stress. The gene has similarity to arabinogalactan proteins and domains associated with cell adhesion.
AT1G60160	522.87	2.49515	0.479299	5.20583	1.93127e-07	2.56858e-06	25.2189	45.6192	57.7307	131.891	154.664	439.232	AT1G60160	KT12	AT1G60160	NA
AT1G54000	495.888	2.49446	0.561643	4.44137	8.93872e-06	7.78922e-05	25.2189	76.032	57.7307	123.932	273.13	500.843	AT1G54000	GLL22	AT1G54000	NA
AT3G45310	4164.13	2.49375	0.373077	6.68427	2.32074e-11	7.03701e-10	209.168	401.703	290.028	976.673	1377.72	2722.84	AT3G45310	NA	AT3G45310	NA
AT2G27920	69.8071	2.47826	1.02777	2.4113	0.0158956	0.0465172	2.96693	0	1.37454	2.27398	6.58145	13.9123	AT2G27920	SCPL51	AT2G27920	NA
AT2G38810	122.058	2.47193	0.402416	6.14271	8.11273e-10	1.84358e-08	8.90078	10.1376	8.24724	43.2055	35.1011	72.5428	AT2G38810	H2A.Z, HTA8	AT2G38810	Encodes HTA8, a histone H2A protein.
AT1G76800	6.86571	2.46899	0.893476	2.76335	0.00572112	0.0201243	2.96693	5.0688	4.12362	26.1507	31.8103	9.93737	AT1G76800	AtVTL2, VTL2	AT1G76800	NA
AT1G66180	161.475	2.46475	0.396401	6.21781	5.04156e-10	1.18047e-08	7.41732	6.336	13.7454	43.2055	42.7794	64.5929	AT1G66180	NA	AT1G66180	NA
AT5G19090	278.476	2.46428	0.411833	5.98369	2.18136e-09	4.58772e-08	23.7354	25.344	16.4945	54.5754	100.916	205.704	AT5G19090	AtHMP46	AT5G19090	NA
AT2G42840	1072.95	2.46424	0.400191	6.15765	7.38327e-10	1.69317e-08	256.639	187.546	158.072	641.261	979.539	1700.28	AT2G42840	PDF1	AT2G42840	Encodes a putative extracellular proline-rich protein is exclusively expressed in the L1 layer of vegetative, inflorescence and floral meristems and the protoderm of organ primordia.
AT3G52910	136.866	2.46135	0.421044	5.84582	5.04082e-09	9.78057e-08	20.7685	26.6112	20.6181	68.2193	75.6867	230.547	AT3G52910	AtGRF4, GRF4	AT3G52910	Growth regulating factor encoding transcription activator. One of the nine members of a GRF gene family, containing nuclear targeting domain. Involved in leaf development and expressed in root, shoot and flower.
AT4G27440	68.8992	2.4595	1.00071	2.45776	0.0139806	0.0419292	16.3181	2.5344	5.49816	32.9726	44.9732	54.6555	AT4G27440	PORB	AT4G27440	light-dependent NADPH:protochlorophyllide oxidoreductase B
AT2G16586	130.786	2.45546	0.344384	7.13003	1.0035e-12	3.92071e-11	71.2063	70.9632	64.6034	465.028	256.677	412.401	AT2G16586	NA	AT2G16586	NA
AT4G27300	35.1262	2.45443	0.758248	3.23697	0.00120807	0.00549181	5.93385	20.2752	21.9926	20.4658	173.311	71.5491	AT4G27300	NA	AT4G27300	NA
AT2G17630	65.103	2.44885	0.570703	4.29094	1.77918e-05	0.000142926	4.45039	19.008	6.8727	28.4247	35.1011	104.342	AT2G17630	PSAT2	AT2G17630	NA
AT2G37460	77.0815	2.44824	0.633445	3.86496	0.000111107	0.000702496	1.48346	3.8016	4.12362	14.7808	13.1629	23.8497	AT2G37460	UMAMIT12	AT2G37460	NA
AT2G37660	557.641	2.44666	0.364973	6.70369	2.03226e-11	6.19979e-10	41.537	62.0928	65.9779	184.192	178.796	562.455	AT2G37660	NA	AT2G37660	NA
AT1G54010	1805.07	2.43598	0.542358	4.49147	7.07345e-06	6.31225e-05	112.743	258.509	229.548	442.288	802.937	2007.35	AT1G54010	GLL23	AT1G54010	NA
AT1G29970	412.674	2.43083	0.169669	14.3269	1.4858e-46	1.41809e-43	157.247	228.096	182.814	1152.91	1068.39	852.626	AT1G29970	RPL18AA	AT1G29970	NA
AT3G61470	25.4284	2.42997	0.838019	2.89966	0.00373564	0.0140898	5.93385	5.0688	13.7454	19.3288	47.1671	66.5804	AT3G61470	LHCA2	AT3G61470	Encodes a component of the light harvesting antenna complex of photosystem I.
AT5G11720	77.1837	2.42989	0.437211	5.5577	2.73348e-08	4.47608e-07	23.7354	12.672	23.3672	65.9453	85.5588	167.942	AT5G11720	AGLU1	AT5G11720	NA
AT5G44460	149.894	2.42898	0.346979	7.00037	2.55281e-12	9.18599e-11	7.41732	13.9392	16.4945	73.9042	46.0701	85.4614	AT5G44460	CML43	AT5G44460	NA
AT5G67070	409.16	2.42841	0.567556	4.27872	1.87972e-05	0.000149981	20.7685	11.4048	10.9963	35.2466	46.0701	149.061	AT5G67070	RALF34, RALFL34	AT5G67070	Member of a diversely expressed predicted peptide family showing sequence similarity to tobacco Rapid Alkalinization Factor (RALF), and is believed to play an essential role in the physiology of Arabidopsis. Consists of a single exon and is characterized by a conserved C-terminal motif and N-terminal signal peptide.
AT2G45340	18.3457	2.42778	0.907648	2.6748	0.00747734	0.0252431	1.48346	2.5344	2.74908	9.0959	5.48454	21.8622	AT2G45340	NA	AT2G45340	NA
AT4G14440	338.899	2.42133	0.438796	5.51814	3.42614e-08	5.48483e-07	14.8346	34.2144	16.4945	55.7124	77.8805	219.616	AT4G14440	ATECI3, ECI3, HCD1	AT4G14440	encodes a cytosolic delta3, delta2-enoyl CoA isomerase, involved in unsaturated fatty acid degradation
AT2G34670	16.5843	2.42059	0.714062	3.38988	0.000699231	0.00347932	4.45039	1.2672	4.12362	9.0959	14.2598	27.8246	AT2G34670	NA	AT2G34670	NA
AT1G17285	48.5278	2.41844	0.692496	3.49235	0.000478796	0.00249584	0	7.6032	0	11.3699	9.87217	21.8622	AT1G17285	NA	AT1G17285	NA
AT5G65020	238.829	2.4173	0.692564	3.49036	0.000482373	0.00251187	10.3842	12.672	38.4871	53.4384	94.3341	180.86	AT5G65020	ANNAT2, AtANN2	AT5G65020	Annexins are calcium binding proteins that are localized in the cytoplasm. When cytosolic Ca2+ increases, they relocate to the plasma membrane. They may be involved in the Golgi-mediated secretion of polysaccharides.
AT5G52950	24.2967	2.41623	1.00684	2.39982	0.0164033	0.0477934	0	2.5344	2.74908	3.41096	3.29072	21.8622	AT5G52950	NA	AT5G52950	NA
AT3G03660	487.356	2.41216	0.448924	5.3732	7.73528e-08	1.13581e-06	7.41732	6.336	4.12362	44.3425	29.6165	21.8622	AT3G03660	WOX11	AT3G03660	Encodes a WUSCHEL-related homeobox gene family member with 65 amino acids in its homeodomain. Proteins in this family contain a sequence of eight residues (TLPLFPMH) downstream of the homeodomain called the WUS box.
AT3G21620	11.274	2.41006	0.993295	2.42633	0.0152523	0.0449761	2.96693	2.5344	0	5.68494	17.5505	5.96242	AT3G21620	NA	AT3G21620	NA
AT4G16008	8.72062	2.40521	0.920017	2.61431	0.00894067	0.0291331	1.48346	1.2672	5.49816	20.4658	15.3567	7.9499	AT4G16008	NA	AT4G16008	NA
AT2G31980	1304.48	2.40186	0.284402	8.44531	3.0324e-17	2.30221e-15	344.164	437.184	448.1	1223.4	1945.92	3329.02	AT2G31980	AtCYS2, CYS2	AT2G31980	NA
AT4G04435	8.51528	2.39722	0.893429	2.68317	0.00729282	0.0247368	2.96693	2.5344	0	9.0959	8.77527	10.9311	AT4G04435	NA	AT4G04435	NA
AT2G23380	107.042	2.39678	0.481856	4.97406	6.55661e-07	7.68054e-06	13.3512	13.9392	12.3709	31.8357	58.1361	118.255	AT2G23380	CLF, ICU1, SDG1, SET1	AT2G23380	Similar to the product of the Polycomb-group gene Enhancer of zeste. Required for stable repression of AG and AP3. Putative role in cell fate determination. Involved in the control of leaf morphogenesis. mutants exhibit curled, involute leaves. AGAMOUS and APETALA3 are ectopically expressed in the mutant.
AT5G60210	128.932	2.39616	0.393812	6.08454	1.16825e-09	2.58447e-08	16.3181	15.2064	19.2436	50.0275	89.9465	126.205	AT5G60210	RIP5	AT5G60210	NA
AT1G44900	162.386	2.39415	0.844698	2.83433	0.00459215	0.0167712	2.96693	10.1376	8.24724	9.0959	14.2598	89.4363	AT1G44900	ATMCM2, MCM2	AT1G44900	Encodes MCM2 (MINICHROMOSOME MAINTENANCE 2), a protein essential to embryo development. Overexpression results in altered root meristem function.
AT1G49580	129.306	2.39369	0.39454	6.06704	1.30288e-09	2.85396e-08	25.2189	21.5424	19.2436	85.2741	70.2021	189.804	AT1G49580	NA	AT1G49580	NA
AT3G47830	16.6808	2.38564	0.869898	2.74244	0.00609847	0.0212024	1.48346	0	5.49816	12.5069	4.38763	18.881	AT3G47830	NA	AT3G47830	NA
AT5G61130	421.993	2.3843	0.406936	5.85915	4.65234e-09	9.10613e-08	5.93385	15.2064	23.3672	47.7535	50.4578	135.148	AT5G61130	AtPDCB1, PDCB1	AT5G61130	Encodes a plasmodesmatal localized protein with callose binding activity. The function of PDCB1 is unknown but overexpression leads to the hyperaccumulation of callose.
AT1G07280	128.475	2.38385	0.266712	8.9379	3.96621e-19	3.95496e-17	25.2189	21.5424	32.989	134.165	144.792	136.142	AT1G07280	NA	AT1G07280	NA
AT3G10720	73.9647	2.37897	0.445593	5.33889	9.35163e-08	1.34942e-06	13.3512	19.008	19.2436	67.0823	75.6867	126.205	AT3G10720	NA	AT3G10720	NA
AT3G45010	279.15	2.37036	0.632127	3.74981	0.000176968	0.0010547	40.0535	15.2064	16.4945	70.4932	64.7176	233.528	AT3G45010	scpl48	AT3G45010	NA
AT3G46970	1361.62	2.36911	0.211819	11.1846	4.8511e-29	1.38901e-26	326.362	411.84	336.762	1299.58	1625.62	2630.42	AT3G46970	ATPHS2, PHS2	AT3G46970	Encodes a cytosolic alpha-glucan phosphorylase. In vitro, the enzyme has a preference for branched polysaccharides, such as glycogen.
AT1G55360	436.2	2.36789	0.334458	7.07978	1.44388e-12	5.40928e-11	17.8016	16.4736	16.4945	59.1234	66.9114	134.154	AT1G55360	NA	AT1G55360	NA
AT5G65590	143.658	2.36308	0.254038	9.30207	1.37731e-20	1.66298e-18	44.5039	54.4896	53.6071	264.918	256.677	265.328	AT5G65590	SCAP1	AT5G65590	NA
AT4G21960	1823.61	2.35858	0.17135	13.7647	4.15354e-43	3.08331e-40	697.228	874.368	955.305	3516.7	4433.7	5013.4	AT4G21960	PRXR1	AT4G21960	Encodes AT4g21960 (AT4g21960/T8O5_170).
AT2G40480	47.7698	2.35756	0.603093	3.90911	9.26378e-05	0.000599402	1.48346	6.336	5.49816	12.5069	21.9382	34.7808	AT2G40480	NA	AT2G40480	NA
AT3G53480	837.425	2.35162	0.337003	6.97804	2.99327e-12	1.06562e-10	26.7023	74.7648	67.3525	163.726	257.773	444.2	AT3G53480	ABCG37, ATPDR9, PDR9, PIS1	AT3G53480	Negative regulator of auxin polar transport inhibitors. ABCG37 regulates auxin distribution and homeostasis in roots by excluding IBA from the root apex, but does not act directly in basipetal transport. ABCG37 and ABCG36 act redundantly at outermost root plasma membranes and, transport IBA out of the cells.
AT1G04090	6.46265	2.34997	0.937283	2.50721	0.0121689	0.0374598	2.96693	2.5344	5.49816	29.5617	18.6474	7.9499	AT1G04090	NA	AT1G04090	NA
AT3G14240	1240.8	2.34629	0.421175	5.57084	2.53521e-08	4.21686e-07	63.7889	45.6192	86.596	154.63	279.712	560.468	AT3G14240	NA	AT3G14240	NA
AT4G30650	55.3841	2.34055	0.682396	3.42991	0.000603786	0.00306682	10.3842	10.1376	1.37454	21.6028	38.3918	50.6806	AT4G30650	NA	AT4G30650	NA
AT5G08260	3591.16	2.3391	0.240799	9.71391	2.63057e-22	3.79313e-20	614.154	766.656	593.801	2171.65	2653.42	5167.43	AT5G08260	scpl35	AT5G08260	NA
AT4G39150	194.244	2.33884	0.398743	5.86553	4.477e-09	8.80595e-08	11.8677	5.0688	16.4945	37.5206	44.9732	83.4739	AT4G39150	NA	AT4G39150	NA
AT1G79420	29.5843	2.33307	0.629996	3.7033	0.000212813	0.00124829	5.93385	1.2672	4.12362	11.3699	23.0351	20.8685	AT1G79420	BDR2	AT1G79420	NA
AT4G34260	384.471	2.33258	0.368244	6.33433	2.38375e-10	5.91306e-09	26.7023	41.8176	67.3525	137.576	167.827	379.608	AT4G34260	AXY8, FUC95A	AT4G34260	NA
AT2G15400	17.878	2.33149	0.66904	3.48483	0.000492451	0.00256036	2.96693	2.5344	4.12362	13.6439	19.7443	14.9061	AT2G15400	NRPE3B, RBP36B	AT2G15400	Non-catalytic subunit of Nuclear DNA-dependent RNA polymerase V; homologous to budding yeast RPB3 and the E. coli RNA polymerase alpha subunit. A closely related paralog, At2g15430 can substitute for At2g15400 in the context of Pol V and encodes the equivalent subunit of Pol II and Pol IV.
AT5G51810	118.11	2.33046	0.361003	6.45551	1.07857e-10	2.85949e-09	10.3842	8.8704	20.6181	72.7672	50.4578	76.5177	AT5G51810	AT2353, ATGA20OX2, GA20OX2	AT5G51810	Encodes gibberellin 20-oxidase. Involved in gibberellin biosynthesis. Up-regulated by far red light in elongating petioles. Not regulated by a circadian clock.
AT3G02900	27.1527	2.3292	0.472193	4.93273	8.10898e-07	9.22408e-06	13.3512	15.2064	1.37454	45.4795	53.7485	51.6743	AT3G02900	NA	AT3G02900	NA
AT2G35470	30.5002	2.32867	0.511993	4.54826	5.40924e-06	5.03798e-05	4.45039	5.0688	8.24724	30.6987	35.1011	23.8497	AT2G35470	NA	AT2G35470	NA
AT2G44830	63.8361	2.32811	0.469568	4.95799	7.12275e-07	8.2521e-06	4.45039	10.1376	12.3709	30.6987	31.8103	73.5365	AT2G44830	AGC1-3, PAX	AT2G44830	NA
AT1G55130	55.8797	2.32705	0.48801	4.76845	1.85652e-06	1.93401e-05	7.41732	8.8704	10.9963	42.0686	50.4578	44.7182	AT1G55130	AtTMN6, TMN6	AT1G55130	Encodes an Arabidopsis Transmembrane nine (TMN) protein. Transmembrane nine (TM9) proteins are localized in the secretory pathway of eukaryotic cells and are involved in cell adhesion and phagocytosis.
AT4G30850	103.865	2.3263	0.38493	6.04345	1.50857e-09	3.27586e-08	16.3181	39.2832	35.738	101.192	133.823	225.578	AT4G30850	HHP2	AT4G30850	heptahelical transmembrane protein homologous to human adiponectin receptors and progestin receptors
AT1G21090	143.704	2.32601	0.334408	6.95561	3.51044e-12	1.23655e-10	16.3181	19.008	23.3672	62.5343	92.1403	139.123	AT1G21090	NA	AT1G21090	NA
AT4G25150	10.0754	2.32366	0.964665	2.40878	0.0160061	0.0467926	0	10.1376	5.49816	26.1507	29.6165	23.8497	AT4G25150	NA	AT4G25150	NA
AT2G39890	595.013	2.32249	0.469014	4.95187	7.35041e-07	8.49621e-06	1.48346	6.336	8.24724	19.3288	19.7443	41.737	AT2G39890	ATPROT1, PROT1	AT2G39890	Encodes a proline transporter with affinity for gly betaine, proline and GABA. Protein is expressed in the vascular tissue, specifically the phloem.
AT5G24314	169.139	2.32215	0.422213	5.49996	3.79871e-08	6.00928e-07	26.7023	39.2832	39.8617	109.151	97.6248	322.965	AT5G24314	PDE225, PTAC7, TAC7	AT5G24314	NA
AT4G09500	20.6998	2.31975	0.880616	2.63423	0.00843282	0.0278175	2.96693	1.2672	1.37454	7.95892	2.19382	16.8935	AT4G09500	NA	AT4G09500	NA
AT5G13180	82.1937	2.31612	0.350101	6.61559	3.70067e-11	1.09238e-09	20.7685	24.0768	37.1126	168.274	154.664	86.4551	AT5G13180	ANAC083, NAC083, VNI2	AT5G13180	Encodes a NAC domain transcription factor that interacts with VND7 and negatively regulates xylem vessel formation.
AT5G45930	57.5644	2.31421	0.591827	3.91028	9.21908e-05	0.000597601	5.93385	10.1376	9.62178	31.8357	19.7443	76.5177	AT5G45930	CHL, CHLI-2, CHLI2	AT5G45930	encodes a second Chl I gene (CHLI2), a subunit of magnesium chelatase which is required for chlorophyll biosynthesis. Has ATPase activity, regulated by TRX-f. Involved in the assembly of the Mg chelatase complex.
AT1G69770	23.8525	2.30063	0.783934	2.93473	0.0033384	0.012823	2.96693	2.5344	5.49816	12.5069	17.5505	23.8497	AT1G69770	CMT3	AT1G69770	Encodes a chromomethylase involved in methylating cytosine residues at non-CG sites. Involved in preferentially methylating transposon-related sequences, reducing their mobility. CMT3 interacts with an Arabidopsis homologue of HP1 (heterochromatin protein 1), which in turn interacts with methylated histones. Involved in gene silencing.
AT4G32880	106.504	2.29859	0.345034	6.66193	2.70247e-11	8.0965e-10	37.0866	24.0768	17.869	86.4111	116.272	182.848	AT4G32880	ATHB-8, ATHB8, HB-8	AT4G32880	member of homeodomain-leucine zipper family, acting as a differentiation-promoting transcription factor of the vascular meristems.
AT2G28590	17.3452	2.29547	0.68014	3.375	0.000738152	0.00364045	4.45039	3.8016	1.37454	17.0548	12.066	17.8873	AT2G28590	PBL6	AT2G28590	NA
AT5G13990	17.2433	2.29394	0.603827	3.79901	0.000145277	0.000891545	13.3512	8.8704	8.24724	44.3425	40.5856	63.5992	AT5G13990	ATEXO70C2, EXO70C2	AT5G13990	A member of EXO70 gene family, putative exocyst subunits, conserved in land plants. Arabidopsis thaliana contains 23 putative EXO70 genes, which can be classified into eight clusters on the phylogenetic tree.
AT1G55810	46.2726	2.29136	0.676103	3.38907	0.000701303	0.00348617	2.96693	8.8704	10.9963	18.1918	17.5505	76.5177	AT1G55810	UCK3, UKL3	AT1G55810	One of the homologous genes predicted to encode proteins with UPRT domains (Uracil phosphoribosyltransferase). Five of these genes (At5g40870, At3g27190, At1g55810, At4g26510 and At3g27440) show a high level of identity, and are annotated as also containing a N-terminal uracil kinase (UK) domain. These genes are referred to as UKL1 (UK-like 1), UKL2, UKL3, UKL4 and UKL5, respectively.
AT1G18250	45.3399	2.2892	0.684646	3.34363	0.000826892	0.00399536	4.45039	11.4048	5.49816	47.7535	24.132	33.7871	AT1G18250	ATLP-1	AT1G18250	encodes a thaumatin-like protein
AT4G34138	24.1096	2.28312	0.744581	3.06631	0.00216717	0.00893574	2.96693	13.9392	10.9963	15.9178	61.4269	59.6242	AT4G34138	UGT73B1	AT4G34138	NA
AT5G66460	1176.15	2.28279	0.274875	8.30482	9.99743e-17	6.98183e-15	194.334	139.392	203.432	562.809	673.502	1373.34	AT5G66460	AtMAN7, MAN7	AT5G66460	NA
AT5G57590	121.728	2.28237	0.42816	5.33065	9.78612e-08	1.40202e-06	11.8677	7.6032	20.6181	40.9316	42.7794	109.311	AT5G57590	BIO1, BIO3	AT5G57590	Mutant complemented by E coli Bio A gene encoding 7,8-diaminopelargonic acid aminotransferase.
AT5G23860	115.139	2.2762	0.417523	5.45169	4.98945e-08	7.69258e-07	14.8346	10.1376	28.8653	47.7535	81.1712	130.18	AT5G23860	TUB8	AT5G23860	beta-tubulin, preferentially expressed in endodermal and phloem cells of primary roots and in the vascular tissues of leaves, stems, and flowers.
AT1G74940	106.404	2.27218	0.725362	3.13247	0.00173341	0.00742524	1.48346	0	5.49816	6.82193	10.9691	14.9061	AT1G74940	NA	AT1G74940	NA
AT5G05890	89.3315	2.26863	0.468278	4.84462	1.26857e-06	1.37067e-05	5.93385	15.2064	13.7454	47.7535	50.4578	71.5491	AT5G05890	UGT76C5	AT5G05890	NA
AT4G35720	8.38945	2.26724	0.914327	2.47968	0.01315	0.0399099	1.48346	5.0688	2.74908	22.7398	10.9691	11.9248	AT4G35720	NA	AT4G35720	NA
AT2G23300	197.23	2.2633	0.232179	9.7481	1.87961e-22	2.77665e-20	40.0535	48.1536	63.2288	238.767	228.157	261.353	AT2G23300	NA	AT2G23300	NA
AT3G16420	508.522	2.2633	0.746319	3.03261	0.00242446	0.00986468	50.4378	82.368	82.4724	151.219	244.611	637.979	AT3G16420	JAL30, PBP1, PBPI	AT3G16420	The PBP1(PYK10-binding protein 1) assists the PYK10 (beta-glucosidase complex) in its activity and may act like a molecular chaperone that facilitates the correct polymerization of PYK10, when tissues are damaged and subcellular structures are destroyed by pests.
AT3G15770	45.5874	2.2614	0.617705	3.66097	0.000251265	0.0014379	2.96693	1.2672	6.8727	23.8767	10.9691	17.8873	AT3G15770	NA	AT3G15770	NA
AT2G39250	41.4338	2.26122	0.375426	6.02307	1.71136e-09	3.68826e-08	20.7685	12.672	37.1126	88.6851	131.629	116.267	AT2G39250	SNZ	AT2G39250	Encodes a AP2 domain transcription factor that can repress flowering. SNZ and its paralogous gene, SCHLAFMUTZE (SMZ), share a signature with partial complementarity to the miR172 microRNA, whose precursor is induced upon flowering.
AT3G02830	34.4901	2.25842	0.511068	4.41901	9.91535e-06	8.55503e-05	11.8677	13.9392	19.2436	79.5892	76.7836	59.6242	AT3G02830	PNT1, ZFN1	AT3G02830	Encodes a zinc finger protein.
AT1G21560	117.798	2.2576	0.372335	6.06337	1.33299e-09	2.9072e-08	14.8346	13.9392	16.4945	45.4795	60.3299	109.311	AT1G21560	NA	AT1G21560	NA
AT2G40550	89.019	2.25336	0.624545	3.608	0.00030857	0.0017151	5.93385	10.1376	8.24724	15.9178	18.6474	81.4864	AT2G40550	ETG1	AT2G40550	Encodes a nuclear localized target of E2Fa-DPa, transcription factors controlling cell cycle progression. Required for sister chromatid cohesion and DNA repair.
AT5G28020	81.9305	2.2513	0.40095	5.61491	1.9666e-08	3.34606e-07	7.41732	6.336	13.7454	44.3425	36.198	49.6869	AT5G28020	ATCYSD2, CYSD2	AT5G28020	Encodes cysteine synthase CysD2.
AT5G52100	14.4748	2.24945	0.727287	3.09294	0.00198186	0.00830143	5.93385	7.6032	6.8727	28.4247	10.9691	57.6367	AT5G52100	CRR1	AT5G52100	Is essential for chloroplast NAD(P)H dehydrogenase activity, which is involved in electron transfer between PSII and PSI. Likely functions in biogenesis or stabilization of the NAD(P)H dehydrogenase complex.
AT4G36770	20.6892	2.24815	0.618303	3.636	0.0002769	0.00156423	1.48346	8.8704	10.9963	36.3836	30.7134	35.7745	AT4G36770	NA	AT4G36770	NA
AT5G20250	2548.45	2.24687	0.712391	3.15399	0.00161057	0.00697821	2.96693	1.2672	12.3709	21.6028	8.77527	47.6994	AT5G20250	DIN10, RS6	AT5G20250	encodes a member of glycosyl hydrolase family 36. Expression is induced within 3 hours of dark treatment, in senescing leaves and treatment with exogenous photosynthesis inhibitor. Induction of gene expression was suppressed in excised leaves supplied with sugar. The authors suggest that the gene's expression pattern is responding to the level of sugar in the cell.
AT1G60660	80.1403	2.24558	0.430065	5.2215	1.77479e-07	2.38739e-06	2.96693	10.1376	9.62178	46.6165	36.198	27.8246	AT1G60660	ATCB5LP, B5, CB5LP	AT1G60660	member of Cytochromes b5
AT5G61440	35.4419	2.24454	0.809997	2.77104	0.00558768	0.0197555	4.45039	0	2.74908	9.0959	4.38763	18.881	AT5G61440	ACHT5	AT5G61440	Encodes a member of the thioredoxin family protein. Located in the chloroplast.
AT5G07180	278.421	2.24405	0.276335	8.12075	4.63323e-16	2.9764e-14	37.0866	34.2144	79.7233	213.754	219.382	281.228	AT5G07180	ERL2	AT5G07180	Encodes a receptor-like kinase that, together with ER and ERL1 governs the initial decision of protodermal cells to either divide proliferatively to produce pavement cells or divide asymmetrically to generate stomatal complexes. It is also important for maintaining stomatal stem cell activity and preventing terminal differentiation of the meristemoid into the guard mother cell. When heterozygous …
AT2G02780	1254.92	2.24257	0.208188	10.7718	4.67634e-27	1.05312e-24	160.214	154.598	200.683	601.467	766.739	1069.26	AT2G02780	NA	AT2G02780	NA
AT3G17840	259.624	2.24253	0.402424	5.57257	2.51006e-08	4.18777e-07	22.252	22.8096	19.2436	50.0275	72.3959	180.86	AT3G17840	RLK902	AT3G17840	Encodes a receptor-like kinase found at the cell surface of various tissues. Its function remains unknown.
AT5G52280	29.8996	2.24204	0.661279	3.39046	0.000697757	0.00347284	8.90078	11.4048	1.37454	17.0548	34.0042	51.6743	AT5G52280	NA	AT5G52280	NA
AT1G64680	81.0656	2.24121	0.460101	4.87113	1.10963e-06	1.21665e-05	22.252	11.4048	13.7454	42.0686	47.1671	132.167	AT1G64680	NA	AT1G64680	NA
AT5G14410	24.8517	2.23834	0.790073	2.83309	0.00461007	0.0168336	4.45039	2.5344	1.37454	3.41096	14.2598	20.8685	AT5G14410	NA	AT5G14410	NA
AT3G06130	46.3607	2.23746	0.676139	3.30917	0.000935726	0.00441135	13.3512	6.336	1.37454	10.2329	31.8103	55.6493	AT3G06130	AtHMP25	AT3G06130	NA
AT5G13870	697.464	2.23374	0.430826	5.18478	2.1627e-07	2.835e-06	151.313	127.987	118.21	317.22	527.613	1023.55	AT5G13870	EXGT-A4, XTH5	AT5G13870	EXGT-A4, endoxyloglucan transferase,
AT5G65700	303.734	2.23086	0.278992	7.99617	1.2835e-15	7.83221e-14	56.3716	69.696	54.9816	192.151	234.738	423.332	AT5G65700	BAM1	AT5G65700	Encodes a CLAVATA1-related receptor kinase-like protein required for both shoot and flower meristem function. Very similar to BAM2,with more than 85% a.a. identity. It has a broad expression pattern and is involved in vascular strand development in the leaf, control of leaf shape, size and symmetry, male gametophyte development and ovule specification and function. Anthers of double mutants (bam1…
AT5G23770	27.7468	2.22659	0.555278	4.00986	6.07541e-05	0.000417161	7.41732	1.2672	5.49816	20.4658	24.132	19.8747	AT5G23770	ATDUF8, DUF8	AT5G23770	Member of the plant-specific DUF724 protein family. Arabidopsis has 10 DUF724 proteins. Loss of function mutant has a WT phenotype
AT1G80640	2431.26	2.22001	0.287313	7.7268	1.1028e-14	5.80143e-13	60.822	114.048	105.84	276.288	348.817	685.679	AT1G80640	NA	AT1G80640	NA
AT5G47440	31.1372	2.217	0.531761	4.16917	3.05714e-05	0.000230181	5.93385	7.6032	5.49816	34.1096	23.0351	31.7996	AT5G47440	FL6	AT5G47440	NA
AT1G67080	235.016	2.21558	0.205113	10.8018	3.37692e-27	7.69131e-25	41.537	49.4208	43.9853	180.781	208.413	238.497	AT1G67080	ABA4	AT1G67080	Encodes a protein involved in the photoprotection of PSII. An aba4-1 mutant completely lacks neoxanthin,a component of the chromophore of the peripheral antenna system in PSII. ABA4 is required for neoxanthin biosynthesis, an intermediary step in abscisic acid biosynthesis, but no catalytic activity has been detected for the ABA4 protein.
AT1G78170	112.55	2.21492	0.320961	6.90088	5.16819e-12	1.7707e-10	20.7685	32.9472	21.9926	90.959	129.435	133.161	AT1G78170	NA	AT1G78170	NA
AT5G06290	104.872	2.21478	0.492634	4.49579	6.93136e-06	6.20202e-05	17.8016	24.0768	17.869	40.9316	62.5238	173.904	AT5G06290	2-Cys, 2CPB	AT5G06290	Encodes a 2-Cys peroxiredoxin (2-Cys PrxB) that contains two catalytic Cys residues.
AT3G06145	51.6237	2.21291	0.684026	3.23513	0.00121587	0.00551975	2.96693	5.0688	2.74908	13.6439	7.67836	28.8184	AT3G06145	NA	AT3G06145	NA
AT1G77885	90.1738	2.21241	0.342428	6.46095	1.04047e-10	2.77685e-09	17.8016	15.2064	15.1199	85.2741	80.0743	57.6367	AT1G77885	NA	AT1G77885	NA
AT1G61800	2198.16	2.21091	0.187682	11.7801	4.94507e-32	1.6519e-29	268.507	484.071	388.995	1464.44	2103.87	1727.11	AT1G61800	ATGPT2, GPT2	AT1G61800	glucose6-Phosphate/phosphate transporter 2
AT5G65640	313.657	2.20739	0.304446	7.25053	4.15143e-13	1.69811e-11	91.9747	63.36	65.9779	203.521	295.068	519.724	AT5G65640	bHLH093, NFL	AT5G65640	NA
AT1G58290	71.0647	2.20633	0.375384	5.87753	4.16426e-09	8.24745e-08	5.93385	13.9392	12.3709	45.4795	55.9423	49.6869	AT1G58290	AtHEMA1, GluTR, HEMA1	AT1G58290	Encodes a protein with glutamyl-tRNA reductase (GluTR) activity, catalyzing the NADPH-dependent reduction of Glu-tRNA(Glu) to glutamate 1-semialdehyde (GSA) with the release of free tRNA(Glu). It is involved in the early steps of chlorophyll biosynthesis.
AT1G17345	94.6701	2.20507	0.503416	4.38021	1.18565e-05	0.000100302	5.93385	6.336	5.49816	34.1096	28.5196	19.8747	AT1G17345	SAUR77	AT1G17345	NA
AT5G25490	97.1815	2.2045	0.394333	5.59044	2.2649e-08	3.80835e-07	20.7685	32.9472	26.1163	76.1782	88.8496	203.716	AT5G25490	NA	AT5G25490	NA
AT3G25530	276.859	2.20161	0.370867	5.93638	2.91377e-09	5.94107e-08	31.1527	34.2144	46.7344	88.6851	125.048	301.102	AT3G25530	ATGHBDH, AtGLYR1, GHBDH, GLYR1, GR1	AT3G25530	Encodes gamma-hydroxybutyrate dehydrogenase (AtGHBDH). Contains a NADP-binding domain. GHBDH is proposed to function in oxidative stress tolerance.
AT2G41190	15.9402	2.20052	0.67184	3.27536	0.00105526	0.00489521	10.3842	2.5344	8.24724	25.0137	21.9382	48.6931	AT2G41190	NA	AT2G41190	NA
AT3G49120	48.9272	2.19894	0.869619	2.52863	0.011451	0.0356219	10.3842	36.7488	21.9926	23.8767	214.994	79.499	AT3G49120	ATPCB, ATPERX34, AtPRX34, PERX34, PRX34, PRXCB	AT3G49120	Class III peroxidase Perx34. Expressed in roots, leaves and stems. Located in the cell wall. Involved in cell elongation. Expression activated by light. May play a role in generating H2O2 during defense response.
AT4G37930	330.588	2.19859	0.24044	9.14404	6.01632e-20	6.51811e-18	91.9747	78.5664	81.0979	343.37	308.231	500.843	AT4G37930	SHM1, SHMT1, STM	AT4G37930	Encodes a protein with mitochondrial serine hydroxymethyltransferase activity, which functions in the photorespiratory pathway, catalyzes the conversion of serine and tetrahydrofolate to glycine and 5,10-methylene tetrahydrofolate. Involved in controlling cell damage caused by abiotic stress, such as high light and salt and the hypersensitive defense response of plants.
AT2G41100	74.2317	2.19656	0.92008	2.38736	0.0169698	0.0490732	22.252	46.8864	50.858	34.1096	398.178	118.255	AT2G41100	ATCAL4, CML12, TCH3	AT2G41100	encodes a calmodulin-like protein, with six potential calcium binding domains. Calcium binding shown by Ca(2+)-specific shift in electrophoretic mobility. Expression induced by touch and darkness. Expression may also be developmentally controlled. Expression in growing regions of roots, vascular tissue, root/shoot junctions, trichomes, branch points of the shoot, and regions of siliques and flowe…
AT3G02110	461.327	2.19427	0.435202	5.04197	4.60769e-07	5.59031e-06	7.41732	16.4736	10.9963	31.8357	39.4887	89.4363	AT3G02110	scpl25	AT3G02110	NA
AT1G68890	138.214	2.19323	0.697685	3.14358	0.00166896	0.00718447	7.41732	25.344	39.8617	34.1096	78.9774	219.616	AT1G68890	PHYLLO	AT1G68890	Homologous to the four eubacterial men genes involved in menanoquinone biosynthesis. Studies of mutants defective in this gene demonstrated its involvement in phylloquinone biosynthesis in Arabidopsis.
AT3G29350	171.794	2.18943	0.260171	8.41535	3.91732e-17	2.90795e-15	26.7023	30.4128	20.6181	106.877	111.885	136.142	AT3G29350	AHP2	AT3G29350	Encodes AHP2, one of the six Arabidopsis thaliana histidine phosphotransfer proteins (AHPs). AHPs function in His-to-Asp phosphorelay signal transduction and as redundant positive regulators of cytokinin signaling. Members of the AHP gene family include: AT3G21510 (AHP1), AT3G29350 (AHP2), AT5G39340 (AHP3), AT3G16360 (AHP4), AT1G03430 (AHP5) and AT1G80100 (AHP6).
AT1G19790	8.01515	2.18923	0.87942	2.4894	0.0127958	0.0390182	1.48346	2.5344	2.74908	4.54795	18.6474	7.9499	AT1G19790	SRS7	AT1G19790	A member of SHI gene family. Arabidopsis thaliana has ten members that encode proteins with a RING finger-like zinc finger motif. Despite being highly divergent in sequence, many of the SHI-related genes are partially redundant in function and synergistically promote gynoecium, stamen and leaf development in Arabidopsis.
AT1G54780	83.6015	2.18672	0.540194	4.04802	5.16518e-05	0.000363248	22.252	12.672	15.1199	40.9316	34.0042	151.048	AT1G54780	AtTLP18.3, TLP18.3	AT1G54780	Encodes a thylakoid lumen protein regulating photosystem II repair cycle.
AT1G13540	12.957	2.18633	0.766537	2.85221	0.00434163	0.0160257	5.93385	1.2672	2.74908	18.1918	12.066	13.9123	AT1G13540	NA	AT1G13540	NA
AT4G10470	40.4555	2.18357	0.629825	3.46695	0.00052639	0.00271778	10.3842	7.6032	12.3709	12.5069	34.0042	90.4301	AT4G10470	NA	AT4G10470	NA
AT3G04630	150.338	2.18305	0.318967	6.84412	7.69463e-12	2.56611e-10	54.8882	53.2224	78.3488	255.822	209.509	380.601	AT3G04630	WDL1	AT3G04630	Member of a small gene family which have a KLEEK domain which may be involved in protein- protein interactions. Over expression of WDL1 results in abnormal root development.
AT5G67200	79.572	2.18267	0.714556	3.05459	0.00225368	0.00925057	0	6.336	1.37454	7.95892	6.58145	21.8622	AT5G67200	NA	AT5G67200	NA
AT4G24930	49.6695	2.17946	0.391112	5.57248	2.51145e-08	4.18777e-07	19.285	16.4736	16.4945	70.4932	53.7485	111.299	AT4G24930	NA	AT4G24930	NA
AT1G63650	101.953	2.17538	0.506907	4.29147	1.77491e-05	0.00014264	5.93385	10.1376	13.7454	26.1507	23.0351	85.4614	AT1G63650	AtEGL3, ATMYC-2, EGL1, EGL3	AT1G63650	Mutant has reduced trichomes, anthocyanin, and seed coat mucilage and abnormally patterned stomates. Encodes a bHLH Transcription Factor 1. The protein is functionally redundant with GL3 and TT8 and interacts with TTG1, the myb proteins GL1, PAP1 and 2, CPC and TRY, and it will form heterodimers with GL3. Expression in N (non-hair cell forming) cell layers is negatively regulated by WER. Expressi…
AT4G17350	115.359	2.17465	0.251077	8.66129	4.66457e-18	4.08262e-16	83.074	54.4896	75.5997	358.151	325.782	275.265	AT4G17350	FL5	AT4G17350	NA
AT2G17230	2447.3	2.17208	0.24647	8.81274	1.22124e-18	1.16942e-16	99.3921	98.8416	94.8433	304.713	345.526	668.785	AT2G17230	EXL5	AT2G17230	NA
AT1G29980	1111.76	2.1718	0.221744	9.79417	1.19275e-22	1.79747e-20	114.227	117.85	140.203	458.206	417.922	799.958	AT1G29980	NA	AT1G29980	NA
AT2G17280	43.8756	2.16298	0.616106	3.51073	0.000446884	0.0023608	2.96693	15.2064	5.49816	26.1507	35.1011	46.7056	AT2G17280	NA	AT2G17280	NA
AT3G19800	94.2589	2.16254	0.301118	7.18171	6.88431e-13	2.75965e-11	34.1197	38.016	43.9853	162.589	119.563	237.503	AT3G19800	DUF177B	AT3G19800	NA
AT4G28140	24.4935	2.16246	0.852947	2.53528	0.0112357	0.0350753	11.8677	15.2064	26.1163	12.5069	171.118	54.6555	AT4G28140	ERF54	AT4G28140	encodes a member of the DREB subfamily A-6 of ERF/AP2 transcription factor family. The protein contains one AP2 domain. There are 8 members in this subfamily including RAP2.4.
AT1G22440	13.482	2.15263	0.899964	2.39191	0.0167609	0.0485882	4.45039	1.2672	9.62178	6.82193	34.0042	26.8309	AT1G22440	NA	AT1G22440	NA
AT1G69490	222.575	2.15182	0.259775	8.28342	1.1969e-16	8.18751e-15	25.2189	46.8864	37.1126	151.219	201.831	137.136	AT1G69490	ANAC029, ATNAP, NAP	AT1G69490	Encodes a member of the NAC transcription factor gene family. It is expressed in floral primordia and upregulated by AP3 and PI. Its expression is associated with leaf senescence.
AT2G24560	154.653	2.15165	0.422889	5.08797	3.6192e-07	4.49998e-06	10.3842	7.6032	5.49816	31.8357	27.4227	43.7244	AT2G24560	NA	AT2G24560	NA
AT1G54580	576.102	2.14245	0.231823	9.24177	2.42461e-20	2.8419e-18	124.611	174.874	169.068	516.193	563.811	990.756	AT1G54580	ACP2, AtACP2	AT1G54580	encodes an acyl carrier protein expressed in leaves, roots, and dry seeds. Gene expression is not regulated by light but downregulated by starvation and upregulated by increased level of exogenous sucrose.
AT2G04790	14.2123	2.14113	0.688792	3.10853	0.00188019	0.00792527	8.90078	3.8016	4.12362	30.6987	32.9072	9.93737	AT2G04790	NA	AT2G04790	NA
AT3G15356	45.3855	2.13966	0.803197	2.66392	0.00772349	0.0259039	5.93385	39.2832	15.1199	21.6028	162.342	83.4739	AT3G15356	NA	AT3G15356	NA
AT2G12646	21.5854	2.13145	0.728059	2.92758	0.0034161	0.0130741	0	7.6032	6.8727	12.5069	14.2598	37.762	AT2G12646	PLATZ7, RITF1	AT2G12646	NA
AT1G79430	99.0487	2.12645	0.323805	6.56707	5.13163e-11	1.46933e-09	47.4708	27.8784	12.3709	150.082	121.757	108.317	AT1G79430	APL, WDY	AT1G79430	Encodes gene product that is required for several aspects of phloem development in the root: (1) the specific divisions organizing the phloem pole, (2) sieve element differentiation and (3) the expression of a companion-specific gene. Mutant has a defect in the organization of phloem poles in the root. apl seedlings have a short, determinate root with only occasional lateral branches.
AT2G16700	39.9557	2.12635	0.366098	5.80813	6.31748e-09	1.2002e-07	28.1858	21.5424	24.7417	153.493	86.6557	84.4676	AT2G16700	ADF5, ATADF5	AT2G16700	Encodes actin depolymerizing factor 5 (ADF5).
AT3G53900	177.315	2.12493	0.43587	4.87515	1.08725e-06	1.19604e-05	10.3842	40.5504	15.1199	68.2193	58.1361	164.96	AT3G53900	PYRR, UPP	AT3G53900	Encodes UPP, a plastidial uracil phosphoribosyltransferase (UPRT) involved in uracil salvage. Loss-of-function mutation causes dramatic growth retardation, a pale-green to albino phenotype, abnormal root morphology and chloroplastic disorders.
AT2G21370	46.3102	2.12374	0.57461	3.69598	0.000219043	0.00128034	8.90078	0	15.1199	17.0548	30.7134	54.6555	AT2G21370	XK-1, XK1	AT2G21370	Although this gene has a sequence similar to xylulose kinases, several lines of experimental evidence suggest that it does not act on xylulose or deoxy-xylulose.
AT5G01775	96.1127	2.12075	0.534677	3.96641	7.29634e-05	0.000489263	2.96693	6.336	5.49816	18.1918	25.2289	21.8622	AT5G01775	NA	AT5G01775	NA
AT3G62630	225.51	2.11999	0.245765	8.62612	6.3471e-18	5.43654e-16	40.0535	87.4368	57.7307	204.658	300.553	306.071	AT3G62630	NA	AT3G62630	NA
AT2G07170	28.6918	2.11957	0.658209	3.22021	0.00128098	0.00575666	8.90078	10.1376	8.24724	11.3699	38.3918	68.5679	AT2G07170	NA	AT2G07170	NA
AT1G72960	6.51613	2.11863	0.809808	2.61621	0.00889121	0.0290019	1.48346	2.5344	4.12362	12.5069	14.2598	8.94363	AT1G72960	NA	AT1G72960	NA
AT3G28040	85.8043	2.11251	0.515764	4.09588	4.20561e-05	0.000304527	4.45039	0	19.2436	36.3836	23.0351	41.737	AT3G28040	NA	AT3G28040	NA
AT5G11420	4750.2	2.11244	0.420743	5.02074	5.14724e-07	6.16653e-06	232.904	356.083	340.886	606.015	1111.17	2304.48	AT5G11420	NA	AT5G11420	NA
AT1G07640	47.1173	2.10699	0.829302	2.54067	0.011064	0.0346655	2.96693	1.2672	1.37454	12.5069	3.29072	7.9499	AT1G07640	OBP2, URP3	AT1G07640	A member of the DOF transcription factors. Prominently expressed in the phloem of leaves and other organs. Expression is induced by wounding, MeJA and insect feeding. Upregulates glucosinolate biosynthesis.
AT1G53300	57.9449	2.1065	0.566068	3.72128	0.000198213	0.00116812	1.48346	20.2752	23.3672	59.1234	64.7176	72.5428	AT1G53300	TTL1	AT1G53300	NA
AT1G73120	630.3	2.10622	0.330464	6.37353	1.84721e-10	4.70441e-09	29.6693	74.7648	41.2362	142.123	156.858	331.908	AT1G73120	NA	AT1G73120	NA
AT3G13190	125.682	2.10556	0.805536	2.61387	0.00895244	0.0291525	4.45039	17.7408	10.9963	5.68494	39.4887	98.38	AT3G13190	NA	AT3G13190	NA
AT4G16480	80.1305	2.10316	0.259636	8.10042	5.47708e-16	3.48499e-14	56.3716	55.7568	39.8617	173.959	238.029	240.484	AT4G16480	ATINT4, INT4	AT4G16480	Encodes a high affinity H+:<i>myo</i>-inositol symporter. The only other compound shown to be transported was pinitol, a methylated derivative of <i>myo</i>-inositol.
AT4G39010	47.2205	2.10291	0.825789	2.54655	0.0108793	0.0341939	2.96693	2.5344	0	4.54795	9.87217	8.94363	AT4G39010	AtGH9B18, CEL6, GH9B18	AT4G39010	NA
AT1G47670	68.6115	2.10175	0.537685	3.90888	9.27241e-05	0.0005997	8.90078	19.008	13.7454	43.2055	23.0351	113.286	AT1G47670	NA	AT1G47670	NA
AT3G11773	7.03145	2.10109	0.772769	2.71891	0.0065497	0.0225632	4.45039	7.6032	2.74908	25.0137	13.1629	25.8372	AT3G11773	NA	AT3G11773	NA
AT2G26330	682.092	2.101	0.206579	10.1704	2.68751e-24	4.76687e-22	164.664	183.744	218.552	612.836	714.087	1105.04	AT2G26330	ER, QRP1	AT2G26330	Homologous to receptor protein kinases. Involved in specification of organs originating from the shoot apical meristem. Contains a cytoplasmic protein kinase catalytic domain, a transmembrane region, and an extracellular leucine-rich repeat. ER has been identified as a quantitative trait locus for transpiration efficiency by influencing epidermal and mesophyll development, stomatal density and po…
AT4G18060	101.376	2.10078	0.435539	4.8234	1.41128e-06	1.507e-05	16.3181	22.8096	15.1199	36.3836	71.299	125.211	AT4G18060	SH3P3	AT4G18060	NA
AT5G13580	12.5168	2.09912	0.627677	3.34427	0.000825007	0.00398833	7.41732	13.9392	6.8727	37.5206	52.6516	31.7996	AT5G13580	ABCG6	AT5G13580	NA
AT3G08030	6997.17	2.09854	0.206529	10.161	2.95962e-24	5.20347e-22	869.31	1622.02	1455.64	4868.58	5111.59	6931.32	AT3G08030	AthA2-1	AT3G08030	NA
AT5G09440	31.1709	2.09733	0.783729	2.67609	0.00744855	0.0251629	1.48346	6.336	0	10.2329	20.8413	3.97495	AT5G09440	EXL4	AT5G09440	NA
AT4G24050	92.668	2.09715	0.3092	6.78249	1.18122e-11	3.8002e-10	35.6031	65.8944	31.6144	137.576	188.668	246.447	AT4G24050	NA	AT4G24050	NA
AT1G03545	16.6465	2.09511	0.575003	3.64365	0.000268804	0.00152467	2.96693	6.336	10.9963	31.8357	18.6474	36.7683	AT1G03545	NA	AT1G03545	NA
AT1G57820	50.6995	2.08689	0.491972	4.24189	2.21648e-05	0.000174067	13.3512	15.2064	6.8727	32.9726	43.8763	73.5365	AT1G57820	ORTH2, VIM1	AT1G57820	Encodes a 645-amino acid methylcytosine-binding protein with a PHD domain, two RING finger domains, and an SRA domain that is involved in centromere heterochromatinization. This protein functions as an E3 ubiquitin ligase in vitro. The protein has been shown to bind to methylated cytosines of CG, CNG and CNN motifs via its SRA domain but has a preference for the former. It plays a role in the est…
AT4G11320	25.7762	2.0854	0.604993	3.44699	0.000566865	0.00290283	17.8016	1.2672	10.9963	59.1234	27.4227	38.7557	AT4G11320	AtCP2, CP2	AT4G11320	NA
AT1G77490	24.1053	2.07828	0.537109	3.86938	0.00010911	0.000692057	10.3842	2.5344	8.24724	36.3836	29.6165	21.8622	AT1G77490	TAPX	AT1G77490	Encodes a chloroplastic thylakoid ascorbate peroxidase tAPX. Ascorbate peroxidases are enzymes that scavenge hydrogen peroxide in plant cells. Eight types of APX have been described for Arabidopsis: three cytosolic (APX1, APX2, APX6), two chloroplastic types (stromal sAPX, thylakoid tAPX), and three microsomal (APX3, APX4, APX5) isoforms.
AT1G49730	83.9974	2.07078	0.436793	4.74086	2.1281e-06	2.17509e-05	19.285	10.1376	6.8727	31.8357	39.4887	78.5052	AT1G49730	NA	AT1G49730	NA
AT1G53690	8.60102	2.06942	0.791656	2.61404	0.00894784	0.029147	1.48346	3.8016	2.74908	12.5069	9.87217	11.9248	AT1G53690	NA	AT1G53690	Protein of unknown function that is homologous to At5g41010, which encodes a non-catalytic subunit common to nuclear DNA-dependent RNA polymerases II, IV and V; homologous to budding yeast RPB12.
AT2G19110	70.9045	2.06799	0.480418	4.30457	1.67308e-05	0.000135325	14.8346	5.0688	10.9963	23.8767	39.4887	63.5992	AT2G19110	ATHMA4, HMA4	AT2G19110	Encodes a protein with similarity to Zn ATPase. Can rescue Zn deficiency in yeast and Cd resistance, suggesting a role in Zn and Cd transport.
AT5G13170	68.5663	2.06684	0.400731	5.15767	2.50046e-07	3.2188e-06	54.8882	20.2752	30.2399	92.096	133.823	211.666	AT5G13170	AtSWEET15, SAG29, SWEET15	AT5G13170	NA
AT1G73220	603.64	2.06267	0.317463	6.49735	8.17453e-11	2.22914e-09	43.0204	12.672	17.869	89.822	102.012	109.311	AT1G73220	AtOCT1, OCT1	AT1G73220	NA
AT5G25010	37.8573	2.05997	0.493304	4.17587	2.96844e-05	0.000224176	1.48346	6.336	20.6181	40.9316	43.8763	34.7808	AT5G25010	NA	AT5G25010	NA
AT5G12950	657.125	2.05915	0.485971	4.23718	2.26347e-05	0.000177283	74.1732	148.262	105.84	223.987	310.425	834.739	AT5G12950	NA	AT5G12950	NA
AT1G29930	44.3424	2.05834	0.805122	2.55655	0.0105715	0.0333851	1.48346	13.9392	17.869	17.0548	65.8145	56.643	AT1G29930	AB140, CAB1, CAB140, LHCB1.3	AT1G29930	Subunit of light-harvesting complex II (LHCII),which absorbs light and transfers energy to the photosynthetic reaction center.
AT1G18265	60.7719	2.04166	0.327477	6.2345	4.53216e-10	1.06994e-08	40.0535	16.4736	41.2362	148.945	112.982	137.136	AT1G18265	NA	AT1G18265	NA
AT5G02190	53.0825	2.04154	0.563619	3.6222	0.000292103	0.00163674	2.96693	7.6032	6.8727	22.7398	9.87217	39.7495	AT5G02190	ASP38, ATASP38, EMB24, PCS1	AT5G02190	encodes an aspartic protease, has an important role in determining cell fate during embryonic development and in reproduction processes. The loss-of-function mutation of PCS1 causes degeneration of both male and female gametophytes and excessive cell death of developing embryos during torpedo stage.
AT1G42970	345.394	2.03995	0.27274	7.47948	7.46166e-14	3.39896e-12	145.379	125.453	119.585	480.946	474.961	647.917	AT1G42970	GAPB	AT1G42970	Encodes chloroplast localized glyceraldehyde-3-phosphate dehydrogenase that can use both NADH and NADPH to reduce 1,3-diphosphate glycerate. It forms A2B2 heterotetramers with GapA forms of the GADPH enzyme. These complexes are active in the light under reducing conditions, but show reduced NADPH-dependent activity in response to oxidized thioredoxins and increased NAD(H)/NADP(H) ratios due to th…
AT3G14220	1110.97	2.03794	0.196318	10.3808	3.03189e-25	5.8431e-23	185.433	217.959	248.792	665.138	793.065	1220.31	AT3G14220	NA	AT3G14220	NA
AT5G02790	58.5743	2.03201	0.374086	5.43193	5.57491e-08	8.48428e-07	23.7354	7.6032	15.1199	76.1782	58.1361	52.6681	AT5G02790	GSTL3	AT5G02790	NA
AT5G07580	29.604	2.028	0.767105	2.64371	0.00820025	0.0271755	1.48346	2.5344	2.74908	9.0959	9.87217	8.94363	AT5G07580	DEWAX2, ERF106	AT5G07580	encodes a member of the ERF (ethylene response factor) subfamily B-3 of ERF/AP2 transcription factor family. The protein contains one AP2 domain. There are 18 members in this subfamily including ATERF-1, ATERF-2, AND ATERF-5.
AT3G45060	1192.02	2.02544	0.294999	6.86591	6.60685e-12	2.23684e-10	43.0204	114.048	45.3598	202.384	325.782	302.096	AT3G45060	ATNRT2.6, NRT2.6	AT3G45060	member of High affinity nitrate transporter family
AT3G06035	17.0105	2.02396	0.659059	3.07098	0.00213354	0.00881886	8.90078	13.9392	2.74908	38.6576	26.3258	39.7495	AT3G06035	NA	AT3G06035	NA
AT2G24150	657.861	2.02227	0.238568	8.47671	2.31659e-17	1.79272e-15	47.4708	103.91	63.2288	221.713	287.39	368.676	AT2G24150	HHP3	AT2G24150	heptahelical transmembrane protein HHP3
AT1G76450	104.086	2.01891	0.3114	6.48333	8.97173e-11	2.43001e-09	41.537	27.8784	45.3598	146.671	116.272	199.741	AT1G76450	NA	AT1G76450	NA
AT1G31070	72.7949	2.01491	0.473569	4.25474	2.09294e-05	0.000165479	7.41732	15.2064	6.8727	27.2877	38.3918	54.6555	AT1G31070	GLCNA.UT1, GlcNAc1pUT1	AT1G31070	Encodes a protein that functions as an N-acetylglucosamine-1-phosphate uridylyltransferase that catalyzes the formation of UDP-N-acetylglucosamine (UDP-GlcNAc). This is an essential precursor for glycolipid and glycoprotein synthesis and is also used for regulatory protein modification in signaling pathways. The enzyme can also catalyze the reverse reaction using both UDP-GlcNAc and the less comm…
AT3G01810	25.0366	2.01113	0.819441	2.45427	0.014117	0.0422751	11.8677	0	2.74908	4.54795	16.4536	35.7745	AT3G01810	NA	AT3G01810	NA
AT3G05932	9.00697	2.00781	0.752699	2.66748	0.00764221	0.0256786	4.45039	2.5344	2.74908	11.3699	16.4536	10.9311	AT3G05932	NA	AT3G05932	NA
AT4G02780	16.27	2.0042	0.557779	3.59317	0.000326675	0.00179878	5.93385	10.1376	6.8727	37.5206	16.4536	38.7557	AT4G02780	ABC33, ATCPS1, CPS, CPS1, GA1	AT4G02780	Catalyzes the conversion of geranylgeranyl pyrophosphate (GGPP) to copalyl pyrophosphate (CPP) of gibberellin biosynthesis
AT5G62700	3106.11	2.00253	0.365169	5.48385	4.16161e-08	6.54718e-07	617.121	999.821	805.48	1855.56	2555.8	5296.62	AT5G62700	TUB3	AT5G62700	encodes tubulin beta-2/beta-3 chain
AT5G07870	76.3465	2.00215	0.410025	4.883	1.04486e-06	1.15639e-05	8.90078	21.5424	16.4945	52.3014	57.0392	80.4927	AT5G07870	NA	AT5G07870	NA
AT3G12120	3226.84	1.9973	0.244275	8.17646	2.92301e-16	1.92085e-14	901.946	1500.37	1084.51	2947.07	4226.39	6751.45	AT3G12120	AtFAD2, FAD2	AT3G12120	Major enzyme responsible for the synthesis of 18:2 fatty acids in the endoplasmic reticulum. Contains His-rich motifs, which contribute to the interaction with the electron donor cytochrome b5. Mutations in this gene suppress the low temperature-induced phenotype of Arabidopsis tocopherol-deficient mutant vte2.
AT5G58000	67.1191	1.99728	0.514931	3.87874	0.000104999	0.000669795	26.7023	15.2064	23.3672	37.5206	49.3609	171.917	AT5G58000	RTN21	AT5G58000	NA
AT3G51600	26.1088	1.99108	0.821378	2.42408	0.0153474	0.0451767	1.48346	3.8016	4.12362	7.95892	8.77527	20.8685	AT3G51600	LTP5	AT3G51600	Predicted to encode a PR (pathogenesis-related) protein. Belongs to the lipid transfer protein (PR-14) family with the following members: At2g38540/LTP1, At2g38530/LTP2, At5g59320/LTP3, At5g59310/LTP4, At3g51600/LTP5, At3g08770/LTP6, At2g15050/LTP7, At2g18370/LTP8, At2g15325/LTP9, At5g01870/LTP10, At4g33355/LTP11, At3g51590/LTP12, At5g44265/LTP13, At5g62065/LTP14, At4g08530/LTP15.
AT1G11130	64.4539	1.9908	0.626602	3.17714	0.00148735	0.00652746	2.96693	10.1376	8.24724	15.9178	9.87217	59.6242	AT1G11130	SCM, SRF9, SUB	AT1G11130	Encodes a receptor-like kinase protein with a predicted extracellular domain of six leucine-rich repeats and an intracellular serine-threonine kinase domain expressed throughout the developing root. Regulates expression of GLABRA2, CAPRICE, WEREWOLF, and ENHANCER OF GLABRA3. Required for floral organ shape, the development of the outer integument of ovules, and stem development. Regulates cell sh…
AT1G70210	35.3563	1.98847	0.543575	3.65814	0.000254056	0.00144908	7.41732	16.4736	12.3709	48.8905	39.4887	56.643	AT1G70210	ATCYCD1;1, CYCD1;1	AT1G70210	Encodes a D-type cyclin that physically interacts with CDC2A. Its expression is upregulated early during germination.
AT5G25890	27.7006	1.98841	0.476215	4.17545	2.97392e-05	0.000224506	16.3181	20.2752	13.7454	84.1371	76.7836	39.7495	AT5G25890	IAA28, IAR2	AT5G25890	encodes a protein that may be a negative regulator of lateral root formation in response to auxin. It is a member of IAA/ARF gene family and is plant-specific. Gain of function mutations in this gene suppresses lateral root formation and is resistant to inhibition of root elongation by auxin, cytokinin, and ethylene.
AT4G28180	16.5359	1.98805	0.691025	2.87696	0.0040153	0.0150007	1.48346	7.6032	1.37454	11.3699	19.7443	11.9248	AT4G28180	NA	AT4G28180	NA
AT5G50090	10.5538	1.98708	0.78227	2.54015	0.0110805	0.0346988	0	2.5344	9.62178	12.5069	12.066	23.8497	AT5G50090	NA	AT5G50090	NA
AT1G65910	22.2313	1.98595	0.507318	3.9146	9.05533e-05	0.000587936	2.96693	11.4048	9.62178	25.0137	30.7134	40.7432	AT1G65910	anac028, NAC028	AT1G65910	NA
AT5G04700	19.0908	1.98255	0.56803	3.49023	0.00048261	0.00251246	4.45039	12.672	4.12362	29.5617	24.132	31.7996	AT5G04700	NA	AT5G04700	NA
AT2G39705	183.812	1.98122	0.165337	11.9829	4.36682e-33	1.6514e-30	89.0078	102.643	92.0942	410.453	365.27	347.808	AT2G39705	DVL11, RTFL8	AT2G39705	NA
AT1G33470	126.671	1.98105	0.41316	4.79487	1.62776e-06	1.71261e-05	8.90078	30.4128	16.4945	64.8083	42.7794	115.273	AT1G33470	NA	AT1G33470	NA
AT1G29230	34.5431	1.97914	0.504774	3.92084	8.82398e-05	0.000574451	2.96693	6.336	13.7454	26.1507	26.3258	38.7557	AT1G29230	ATCIPK18, ATWL1, CIPK18, SnRK3.20, WL1	AT1G29230	Encodes a member of the SNF1-related kinase (SnRK) gene family (SnRK3.20), which has also been reported as a member of the CBL-interacting protein kinases (CIPK18).
AT2G01020	2770.12	1.9775	0.17866	11.0685	1.78365e-28	4.64281e-26	1900.32	2190.99	1877.62	9699.64	6699.92	7110.19	AT2G01020	NA	AT2G01020	NA
AT1G32450	95.6913	1.97707	0.366011	5.40166	6.60271e-08	9.86861e-07	103.842	44.352	75.5997	430.918	245.707	201.729	AT1G32450	AtNPF7.3, NPF7.3, NRT1.5	AT1G32450	Transmembrane nitrate transporter. Involved in xylem transport of nitrate from root to shoot. Induced in response to nitrate. Not involved in nitrate uptake. expressed in root pericycle cells.
AT5G03050	48.7394	1.97551	0.335891	5.8814	4.06804e-09	8.10493e-08	22.252	19.008	28.8653	86.4111	66.9114	121.236	AT5G03050	NA	AT5G03050	NA
AT5G02890	23.3788	1.97475	0.759261	2.60088	0.00929856	0.0301084	7.41732	6.336	4.12362	6.82193	13.1629	49.6869	AT5G02890	NA	AT5G02890	NA
AT4G22010	67.4641	1.97418	0.67069	2.94351	0.00324515	0.0125323	4.45039	11.4048	2.74908	11.3699	19.7443	42.7307	AT4G22010	sks4	AT4G22010	NA
AT5G10560	244.586	1.97412	0.317391	6.21984	4.97673e-10	1.16665e-08	54.8882	48.1536	68.727	153.493	167.827	351.783	AT5G10560	NA	AT5G10560	NA
AT5G09820	22.6466	1.96959	0.757842	2.59895	0.00935096	0.0302537	8.90078	7.6032	0	9.0959	14.2598	40.7432	AT5G09820	FBN5	AT5G09820	NA
AT4G18970	44.647	1.96924	0.774693	2.54196	0.0110234	0.0345663	22.252	11.4048	9.62178	45.4795	41.6825	81.4864	AT4G18970	NA	AT4G18970	NA
AT4G12800	33.0063	1.96917	0.525014	3.7507	0.000176339	0.00105158	5.93385	11.4048	6.8727	36.3836	17.5505	41.737	AT4G12800	PSAL	AT4G12800	Encodes subunit L of photosystem I reaction center.
AT2G18230	231.817	1.96486	0.263105	7.46797	8.14419e-14	3.70145e-12	35.6031	35.4816	30.2399	108.014	105.303	180.86	AT2G18230	AtPPa2, PPa2	AT2G18230	Encodes a protein that might have inorganic pyrophosphatase activity.
AT3G09440	3001.32	1.96283	0.214592	9.14679	5.86494e-20	6.42355e-18	581.518	712.167	529.198	1480.36	2518.5	3108.41	AT3G09440	NA	AT3G09440	NA
AT3G18090	107.318	1.96218	0.380682	5.15438	2.54473e-07	3.27159e-06	7.41732	15.2064	16.4945	51.1645	30.7134	71.5491	AT3G18090	NRPD2B	AT3G18090	Encodes a subunit of RNA polymerase IV (aka RNA polymerase D). NRPD2b is closely related to NRPD2a, but has lower levels of transcription and does not affect endogenous siRNA when mutated.
AT2G32100	8.88241	1.96207	0.70519	2.78233	0.00539705	0.0192103	2.96693	5.0688	8.24724	20.4658	15.3567	27.8246	AT2G32100	ATOFP16, OFP16	AT2G32100	NA
AT2G21590	23.3274	1.9613	0.484296	4.04978	5.12648e-05	0.000360653	7.41732	7.6032	13.7454	30.6987	38.3918	42.7307	AT2G21590	APL4	AT2G21590	Encodes the large subunit of ADP-glucose pyrophosphorylase, the enzyme which catalyzes the first and limiting step in starch biosynthesis. The large subunit plays a regulatory role whereas the small subunit (ApS) is the catalytic isoform. Four isoforms of the large subunit (ApL1-4) have been described.
AT3G26060	199.978	1.96028	0.384017	5.10465	3.31401e-07	4.14624e-06	72.6897	58.2912	71.4761	155.767	172.215	458.113	AT3G26060	ATPRX, PRXQ	AT3G26060	encodes periredoxin Q which decomposes peroxides and plays a role in the protection of the photosynthetic apparatus
AT4G30620	252.637	1.95844	0.429621	4.55853	5.15141e-06	4.82025e-05	25.2189	44.352	39.8617	75.0412	73.4928	277.253	AT4G30620	STCL	AT4G30620	NA
AT4G24190	2311.39	1.95772	0.413027	4.73992	2.13801e-06	2.18299e-05	226.97	264.845	225.425	538.932	741.51	1505.51	AT4G24190	AtHsp90-7, AtHsp90.7, HSP90.7, SHD	AT4G24190	encodes an ortholog of GRP94, an ER-resident HSP90-like protein and is involved in regulation of meristem size and organization. Single and double mutant analyses suggest that SHD may be required for the correct folding and/or complex formation of CLV proteins. Lines carrying recessive mutations in this locus exhibits expanded shoot meristems, disorganized root meristems, and defective pollen tub…
AT4G02380	1891.57	1.95765	0.389276	5.02897	4.93131e-07	5.9398e-06	148.346	373.824	303.773	585.549	1095.81	1529.36	AT4G02380	AtLEA5, LEA38, SAG21	AT4G02380	Encodes AtLEA5 (late embryogenesis abundant like protein). Also known as SENESCENCE-ASSOCIATED GENE 21 (SAG21). Has a role on oxidative stress tolerance. mRNA levels are elevated in response to various stresses.
AT5G67150	30.6719	1.95076	0.537089	3.63209	0.00028113	0.00158411	7.41732	5.0688	8.24724	23.8767	18.6474	36.7683	AT5G67150	NA	AT5G67150	NA
AT5G54510	112.99	1.94902	0.5482	3.55531	0.000377538	0.00204237	5.93385	5.0688	27.4908	27.2877	60.3299	60.618	AT5G54510	DFL1, GH3.6	AT5G54510	Encodes an IAA-amido synthase that conjugates Ala, Asp, Phe, and Trp to auxin. Lines overexpressing this gene accumulate IAA-ASP and are hypersensitive to several auxins. Identified as a dominant mutation that displays shorter hypocotyls in light grown plants when compared to wild type siblings. Protein is similar to auxin inducible gene from pea (GH3).
AT4G21910	337.011	1.94637	0.258764	7.52178	5.40347e-14	2.52452e-12	20.7685	29.1456	24.7417	75.0412	91.0434	122.23	AT4G21910	NA	AT4G21910	NA
AT2G40940	330.742	1.94563	0.260933	7.45645	8.88832e-14	3.96767e-12	13.3512	34.2144	24.7417	73.9042	91.0434	117.261	AT2G40940	ERS, ERS1	AT2G40940	Ethylene receptor, subfamily 1. Has histidine kinase activity.
AT1G18550	15.5725	1.94517	0.670678	2.9003	0.00372801	0.0140664	2.96693	3.8016	4.12362	14.7808	18.6474	8.94363	AT1G18550	NA	AT1G18550	NA
AT2G37930	70.4347	1.9441	0.421547	4.61181	3.99168e-06	3.828e-05	7.41732	19.008	19.2436	39.7946	40.5856	96.3925	AT2G37930	NA	AT2G37930	NA
AT2G01620	49.1322	1.9432	0.367436	5.28853	1.23302e-07	1.7258e-06	26.7023	13.9392	21.9926	63.6713	70.2021	104.342	AT2G01620	MEE11	AT2G01620	NA
AT5G59020	25.6169	1.94268	0.661868	2.93515	0.0033339	0.0128133	2.96693	6.336	1.37454	18.1918	9.87217	13.9123	AT5G59020	NA	AT5G59020	NA
AT4G02530	137.668	1.94157	0.462262	4.20014	2.66748e-05	0.000204154	25.2189	16.4736	19.2436	51.1645	34.0042	147.073	AT4G02530	MPH2	AT4G02530	NA
AT4G01460	246.278	1.94144	0.165832	11.7072	1.17027e-31	3.8452e-29	112.743	168.538	169.068	570.768	541.873	623.073	AT4G01460	NA	AT4G01460	NA
AT3G52770	243.963	1.94142	0.282582	6.8703	6.40683e-12	2.17648e-10	132.028	217.959	158.072	969.851	496.899	488.919	AT3G52770	ZPR3	AT3G52770	ZPR3 is a small-leucine zipper containing protein that is involved in the establishment of leaf polarity.
AT4G11080	16.6886	1.93924	0.707343	2.74158	0.00611446	0.0212359	5.93385	6.336	6.8727	34.1096	5.48454	33.7871	AT4G11080	3xHMG-box1	AT4G11080	NA
AT2G03350	73.116	1.93862	0.568608	3.40941	0.000651029	0.00327524	4.45039	7.6032	8.24724	17.0548	10.9691	49.6869	AT2G03350	NA	AT2G03350	NA
AT3G49290	77.2611	1.93706	0.345085	5.61329	1.98515e-08	3.37475e-07	28.1858	25.344	26.1163	83.0001	75.6867	145.086	AT3G49290	ABIL2	AT3G49290	One of four ABI-like proteins.
AT3G61820	442.033	1.93653	0.472535	4.09818	4.16411e-05	0.000302223	7.41732	6.336	5.49816	22.7398	13.1629	36.7683	AT3G61820	NA	AT3G61820	NA
AT3G62390	65.995	1.9327	0.38602	5.00674	5.53599e-07	6.58113e-06	7.41732	19.008	6.8727	38.6576	51.5547	39.7495	AT3G62390	TBL6	AT3G62390	Encodes a member of the TBL (TRICHOME BIREFRINGENCE-LIKE) gene family containing a plant-specific DUF231 (domain of unknown function) domain. TBL gene family has 46 members, two of which (TBR/AT5G06700 and TBL3/AT5G01360) have been shown to be involved in the synthesis and deposition of secondary wall cellulose, presumably by influencing the esterification state of pectic polymers. A nomenclature…
AT3G47650	339.117	1.9314	0.363017	5.32042	1.03528e-07	1.47478e-06	66.7559	119.117	83.8469	203.521	241.32	585.311	AT3G47650	BSD2	AT3G47650	NA
AT5G65990	53.5922	1.92879	0.512019	3.76703	0.000165198	0.000995751	7.41732	21.5424	5.49816	42.0686	26.3258	64.5929	AT5G65990	AtAVT3	AT5G65990	NA
AT5G10120	3272.75	1.92779	0.206692	9.32686	1.0905e-20	1.33273e-18	658.658	966.874	922.316	2757.2	3055.99	3884.52	AT5G10120	NA	AT5G10120	NA
AT4G32460	499.543	1.92724	0.361236	5.33512	9.54805e-08	1.37308e-06	60.822	51.9552	82.4724	158.041	176.602	406.438	AT4G32460	AthA1-1, BDX, BIIDXI	AT4G32460	NA
AT2G04039	52.4945	1.92583	0.426807	4.51219	6.41625e-06	5.81642e-05	25.2189	6.336	6.8727	43.2055	37.2949	61.6117	AT2G04039	NdhV	AT2G04039	NA
AT3G25690	97.435	1.9237	0.356309	5.39895	6.70329e-08	9.99658e-07	10.3842	8.8704	17.869	35.2466	60.3299	44.7182	AT3G25690	AtCHUP1, CHUP1	AT3G25690	actin binding protein required for normal chloroplast positioning
AT1G27460	183.888	1.91697	0.303745	6.31111	2.77042e-10	6.79652e-09	38.5701	24.0768	38.4871	88.6851	102.012	187.816	AT1G27460	NPGR1	AT1G27460	encodes a calmodulin-binding protein that is expressed in pollen, suspension culture cells, flowers, and fruits.
AT4G28730	21.6268	1.91195	0.546881	3.49609	0.000472122	0.00246811	8.90078	13.9392	0	28.4247	30.7134	27.8246	AT4G28730	GrxC5	AT4G28730	NA
AT2G29180	85.998	1.91156	0.380692	5.02127	5.13309e-07	6.15694e-06	17.8016	29.1456	31.6144	86.4111	65.8145	144.092	AT2G29180	NA	AT2G29180	NA
AT5G58300	57.6163	1.91113	0.346593	5.51404	3.50682e-08	5.59423e-07	20.7685	27.8784	15.1199	61.3973	75.6867	103.349	AT5G58300	NA	AT5G58300	NA
AT5G51010	45.0062	1.90986	0.498879	3.8283	0.000129032	0.000801423	22.252	8.8704	6.8727	29.5617	36.198	74.5303	AT5G51010	NA	AT5G51010	NA
AT5G43330	433.466	1.90928	0.28992	6.58553	4.53258e-11	1.30527e-09	69.7228	121.651	100.341	214.891	343.332	539.599	AT5G43330	c-NAD-MDH2	AT5G43330	NA
AT3G06740	33.2652	1.90895	0.51767	3.68758	0.000226401	0.00131682	14.8346	6.336	4.12362	31.8357	31.8103	29.8121	AT3G06740	GATA15	AT3G06740	Encodes a member of the GATA factor family of zinc finger transcription factors.
AT5G65740	67.6364	1.90777	0.477811	3.99272	6.53189e-05	0.000444244	4.45039	11.4048	19.2436	22.7398	43.8763	65.5866	AT5G65740	NA	AT5G65740	NA
AT5G14940	21.1051	1.90476	0.607006	3.13795	0.00170133	0.00730029	10.3842	5.0688	6.8727	31.8357	37.2949	13.9123	AT5G14940	NA	AT5G14940	NA
AT1G15290	884.784	1.90125	0.224735	8.45994	2.67519e-17	2.03874e-15	72.6897	87.4368	108.589	244.452	295.068	464.075	AT1G15290	REC3	AT1G15290	NA
AT1G08980	174.11	1.90089	0.20835	9.12356	7.26956e-20	7.83353e-18	54.8882	83.6352	93.4687	268.329	262.161	338.864	AT1G08980	AMI1, ATAMI1, ATTOC64-I, TOC64-I	AT1G08980	Encodes an enzyme with similarity to bacterial acylamidohydrolases and exhibits indole-3-acetamide amidohydrolase activity in vitro. This enzyme may be involved in the in vivo biosynthesis of indole-acetic acid from indole-3-acetamide, a native metabolite of A. thaliana. It appears to exist as a monomer.
AT2G23100	19.3944	1.89762	0.77824	2.43835	0.0147544	0.0437524	2.96693	1.2672	2.74908	5.68494	7.67836	11.9248	AT2G23100	NA	AT2G23100	NA
AT4G22540	57.6222	1.89587	0.340779	5.56334	2.64658e-08	4.35623e-07	20.7685	25.344	17.869	70.4932	88.8496	79.499	AT4G22540	ORP2A	AT4G22540	NA
AT2G19090	75.4208	1.89448	0.40436	4.68514	2.79764e-06	2.78417e-05	8.90078	21.5424	10.9963	28.4247	52.6516	74.5303	AT2G19090	NA	AT2G19090	NA
AT5G18590	558.923	1.8935	0.247838	7.6401	2.17057e-14	1.08491e-12	35.6031	65.8944	72.8506	162.589	186.474	301.102	AT5G18590	NA	AT5G18590	NA
AT4G35880	70.09	1.89167	0.39164	4.83013	1.36446e-06	1.46167e-05	28.1858	8.8704	6.8727	47.7535	40.5856	70.5553	AT4G35880	NA	AT4G35880	NA
AT2G25100	108.111	1.89143	0.437962	4.3187	1.5695e-05	0.000128188	19.285	13.9392	35.738	47.7535	63.6207	143.098	AT2G25100	NA	AT2G25100	NA
AT2G32940	33.4	1.89024	0.461994	4.09149	4.28607e-05	0.000309458	13.3512	5.0688	10.9963	45.4795	40.5856	21.8622	AT2G32940	AGO6	AT2G32940	Encodes a nuclear localized 879-amino-acid protein that contains conserved PAZ and PIWI domains that is important for the accumulation of specific heterochromatin-related siRNAs, and for DNA methylation and transcriptional gene silencing.
AT4G27710	18.8215	1.88298	0.574291	3.2788	0.00104251	0.00484577	5.93385	10.1376	12.3709	32.9726	42.7794	29.8121	AT4G27710	CYP709B3	AT4G27710	member of CYP709B
AT5G62500	17.3007	1.88209	0.686871	2.7401	0.00614212	0.0213208	10.3842	3.8016	4.12362	18.1918	14.2598	33.7871	AT5G62500	ATEB1, ATEB1B, EB1B	AT5G62500	encodes a homolog of animal microtubule-end-binding protein. There are two other members of this family. EB1 forms foci at regions where the minus ends of microtubules are gathered during mitosis and early cytokinesis.
AT3G01470	330.997	1.88207	0.168626	11.1612	6.3107e-29	1.78148e-26	71.2063	127.987	101.716	353.603	389.402	374.639	AT3G01470	AT3G01472.1, ATHB-1, ATHB1, CPuORF33, HAT5, HB-1, HD-ZIP-1	AT3G01470	Encodes a homeodomain leucine zipper class I (HD-Zip I) transcriptional activator involved in leaf development.
AT1G46264	111.005	1.88125	0.348497	5.39819	6.73181e-08	1.00242e-06	26.7023	40.5504	20.6181	65.9453	97.6248	160.985	AT1G46264	AT-HSFB4, HSFB4, SCZ	AT1G46264	Encodes SCHIZORIZA, a member of Heat Shock Transcription Factor (Hsf) family. Functions as a nuclear factor regulating asymmetry of stem cell divisions.
AT1G68590	351.754	1.88059	0.324959	5.78715	7.15915e-09	1.34733e-07	71.2063	74.7648	74.2252	184.192	175.505	450.163	AT1G68590	PSRP3/1	AT1G68590	NA
AT3G62150	147.984	1.87894	0.427368	4.39654	1.09992e-05	9.38786e-05	11.8677	17.7408	10.9963	35.2466	86.6557	28.8184	AT3G62150	ABCB21, PGP21	AT3G62150	NA
AT3G48900	24.2187	1.87811	0.454488	4.13237	3.5904e-05	0.000265348	11.8677	19.008	26.1163	72.7672	68.0083	69.5616	AT3G48900	AtSEND1, SEND1	AT3G48900	NA
AT1G72940	160.212	1.87563	0.397947	4.71327	2.43771e-06	2.45893e-05	16.3181	24.0768	23.3672	32.9726	77.8805	123.223	AT1G72940	NA	AT1G72940	NA
AT1G77580	96.5744	1.87526	0.397523	4.71736	2.38928e-06	2.41372e-05	25.2189	20.2752	30.2399	51.1645	69.1052	156.017	AT1G77580	VETH3	AT1G77580	NA
AT2G22900	156.853	1.87465	0.244449	7.66888	1.7351e-14	8.8042e-13	29.6693	16.4736	32.989	89.822	94.3341	102.355	AT2G22900	MAGT1, MUCI10	AT2G22900	NA
AT3G25710	36.089	1.87408	0.546244	3.43085	0.000601698	0.00305777	2.96693	13.9392	6.8727	27.2877	19.7443	41.737	AT3G25710	ATAIG1, BHLH32, TMO5	AT3G25710	Encodes a basic helixloophelix transcription factor that is expressed in the hypophysis-adjacent embryo cells, and is required and partially sufficient for MP-dependent root initiation. Involved in response to phosphate starvation. Negative regulator of root hair development, anthocyanin formation and Pi content.
AT4G19130	20.5874	1.87264	0.591935	3.16359	0.00155834	0.00679143	7.41732	5.0688	2.74908	12.5069	18.6474	23.8497	AT4G19130	RPA1E	AT4G19130	NA
AT1G16520	334.31	1.87058	0.528837	3.53717	0.000404441	0.00216743	34.1197	74.7648	45.3598	71.6302	141.501	351.783	AT1G16520	NAIP2	AT1G16520	NA
AT1G44970	11.9597	1.86981	0.618087	3.02515	0.00248506	0.0100765	14.8346	10.1376	5.49816	36.3836	29.6165	44.7182	AT1G44970	PRX9	AT1G44970	NA
AT3G50750	67.3299	1.86763	0.518751	3.60025	0.000317908	0.00176115	8.90078	6.336	5.49816	20.4658	15.3567	38.7557	AT3G50750	BEH1	AT3G50750	NA
AT1G61810	43.5132	1.86698	0.706166	2.64383	0.00819734	0.0271704	32.6362	41.8176	24.7417	43.2055	264.355	54.6555	AT1G61810	BGLU45	AT1G61810	NA
AT1G67830	29.2963	1.86618	0.729944	2.55661	0.0105698	0.0333851	4.45039	7.6032	8.24724	12.5069	8.77527	52.6681	AT1G67830	ATFXG1, FXG1	AT1G67830	Encodes a protein with &#945;-fucosidase activity. The activity was assessed on 2'-fucosyl-lactitol. AtFXG1 was able to remove the t-fucosyl residues of XXFG xyloglucan oligosaccharides.
AT5G48500	131.799	1.86315	0.441365	4.22133	2.42861e-05	0.00018794	20.7685	39.2832	21.9926	44.3425	80.0743	174.898	AT5G48500	NA	AT5G48500	NA
AT5G49760	57.6113	1.85631	0.441695	4.20269	2.63761e-05	0.00020224	13.3512	35.4816	13.7454	42.0686	105.303	81.4864	AT5G49760	HPCA1	AT5G49760	NA
AT3G05180	48.7451	1.85576	0.457363	4.05752	4.95966e-05	0.000350269	14.8346	11.4048	15.1199	47.7535	27.4227	73.5365	AT3G05180	NA	AT3G05180	NA
AT3G29320	352.961	1.84962	0.298998	6.18604	6.16931e-10	1.4295e-08	97.9086	116.582	149.825	278.562	355.398	678.722	AT3G29320	PHS1	AT3G29320	Encodes a plastidic alpha-glucan phosphorylase. In vitro, the enzyme has a preference for maltooligosaccharides, such as maltoheptaose.
AT2G45790	244.631	1.84832	0.301918	6.12193	9.24487e-10	2.0773e-08	54.8882	53.2224	64.6034	160.315	162.342	298.121	AT2G45790	ATPMM, PMM	AT2G45790	encodes a phosphomannomutase, involved in ascorbate biosynthesis
AT1G45688	144.085	1.84811	0.350945	5.26608	1.39364e-07	1.92374e-06	69.7228	78.5664	63.2288	262.644	182.087	317.002	AT1G45688	CC1	AT1G45688	NA
AT1G32900	234.29	1.84697	0.285759	6.46341	1.0237e-10	2.73574e-09	38.5701	29.1456	49.4834	90.959	140.404	187.816	AT1G32900	GBSS1	AT1G32900	NA
AT3G49900	7.17829	1.84639	0.74648	2.47346	0.0133813	0.0404406	2.96693	3.8016	5.49816	20.4658	10.9691	12.9186	AT3G49900	NA	AT3G49900	NA
AT5G37540	23.5342	1.8446	0.443383	4.16028	3.17854e-05	0.000238248	8.90078	15.2064	15.1199	38.6576	49.3609	53.6618	AT5G37540	NA	AT5G37540	NA
AT1G47960	453.641	1.84353	0.229556	8.03082	9.68231e-16	5.97115e-14	96.4251	62.0928	74.2252	285.384	197.443	347.808	AT1G47960	ATC/VIF1, AtCIF1, C/VIF1, CIF1	AT1G47960	Plant cell wall (CWI) and vacuolar invertases (VI) play important roles in carbohydrate metabolism, stress responses and sugar signaling. This protein may inhibit their activity.
AT2G23360	19.6048	1.8418	0.76527	2.40673	0.016096	0.0470211	7.41732	2.5344	20.6181	10.2329	46.0701	52.6681	AT2G23360	NA	AT2G23360	NA
AT2G22680	987.234	1.83896	0.158562	11.5977	4.23303e-31	1.30527e-28	433.171	584.179	628.165	1935.15	1802.22	2154.42	AT2G22680	WAVH1	AT2G22680	NA
AT3G61630	53.3652	1.8366	0.323895	5.67037	1.42492e-08	2.48994e-07	19.285	19.008	35.738	85.2741	84.4619	94.405	AT3G61630	CRF6	AT3G61630	CRF6 encodes one of the six cytokinin response factors. CRF5 belongs to the AP2/ERF superfamily of the transcriptional factors. CRF proteins rapidly relocalize to the nucleus in response to cytokinin. Analysis of loos-of-function mutants revealed that the CRFs function redundantly to regulate the development of embryos, cotyledons and leaves.
AT1G28260	70.1538	1.83404	0.328004	5.59151	2.25104e-08	3.79139e-07	29.6693	36.7488	27.4908	125.069	120.66	90.4301	AT1G28260	NA	AT1G28260	NA
AT4G34419	119.571	1.83158	0.268623	6.81842	9.20444e-12	3.04748e-10	65.2724	59.5584	42.6107	195.562	143.695	255.39	AT4G34419	NA	AT4G34419	NA
AT1G51670	10.3884	1.82931	0.628503	2.91059	0.00360751	0.0136812	2.96693	8.8704	10.9963	27.2877	32.9072	21.8622	AT1G51670	HTT5	AT1G51670	NA
AT3G09035	87.2958	1.829	0.405617	4.50919	6.50763e-06	5.8886e-05	8.90078	3.8016	16.4945	32.9726	26.3258	42.7307	AT3G09035	NA	AT3G09035	NA
AT3G14950	9.96121	1.82878	0.647065	2.82627	0.00470933	0.0171429	5.93385	11.4048	6.8727	39.7946	25.2289	21.8622	AT3G14950	TTL2	AT3G14950	NA
AT2G33130	15.1923	1.82797	0.627203	2.91449	0.00356273	0.013537	4.45039	12.672	20.6181	51.1645	55.9423	27.8246	AT2G33130	RALF18, RALFL18	AT2G33130	Member of a diversely expressed predicted peptide family showing sequence similarity to tobacco Rapid Alkalinization Factor (RALF), and is believed to play an essential role in the physiology of Arabidopsis. Consists of a single exon and is characterized by a conserved C-terminal motif and N-terminal signal peptide.
AT1G48530	143.825	1.82789	0.268841	6.79918	1.0522e-11	3.40698e-10	69.7228	63.36	90.7196	345.644	207.316	241.478	AT1G48530	NA	AT1G48530	NA
AT5G56040	108.517	1.82628	0.344625	5.29933	1.1623e-07	1.63818e-06	13.3512	21.5424	19.2436	42.0686	70.2021	80.4927	AT5G56040	RGI4, SKM2	AT5G56040	NA
AT2G22670	886.423	1.82464	0.150572	12.1181	8.47132e-34	3.46512e-31	259.606	276.25	241.919	906.179	731.638	1116.96	AT2G22670	IAA8	AT2G22670	IAA8 (IAA8) gene is auxin inducible.
AT2G26700	16.4796	1.82171	0.586981	3.10353	0.0019123	0.00804707	7.41732	2.5344	9.62178	27.2877	12.066	28.8184	AT2G26700	AGC1-10, PID2	AT2G26700	Encodes PID2, a homolog of PID. Simultaneous disruption of PID(AT2G34650) and its 3 closest homologs (PID2/AT2G26700, WAG1/AT1G53700, and WAG2/AT3G14370) abolishes the formation of cotyledons.
AT5G64040	23.2021	1.81903	0.746561	2.43655	0.0148281	0.043945	0	6.336	9.62178	10.2329	21.9382	24.8434	AT5G64040	PSAN	AT5G64040	Encodes the only subunit of photosystem I located entirely in the thylakoid lumen. May be involved in the interaction between plastocyanin and the photosystem I complex.
AT5G47370	145.42	1.81775	0.277388	6.55308	5.63611e-11	1.5978e-09	48.9543	72.2304	45.3598	186.466	231.448	171.917	AT5G47370	HAT2	AT5G47370	homeobox-leucine zipper genes induced by auxin, but not by other phytohormones. Plays opposite roles in the shoot and root tissues in regulating auxin-mediated morphogenesis.
AT2G05790	264.886	1.81573	0.362675	5.00648	5.5433e-07	6.58591e-06	63.7889	81.1008	60.4798	172.822	132.726	417.37	AT2G05790	NA	AT2G05790	NA
AT3G16180	32.8353	1.81537	0.716956	2.53205	0.0113399	0.0353476	1.48346	3.8016	2.74908	7.95892	8.77527	11.9248	AT3G16180	NRT1.12	AT3G16180	NA
AT1G64860	73.1821	1.81525	0.421569	4.30593	1.66287e-05	0.000134608	19.285	7.6032	16.4945	25.0137	50.4578	74.5303	AT1G64860	RPOD1, SIG1, SIG2, SIGA, SIGB	AT1G64860	Subunit of chloroplast RNA polymerase, confers the ability to recognize promoter sequences on the core enzyme
AT4G28170	22.7005	1.81325	0.482172	3.76059	0.000169514	0.00101632	4.45039	21.5424	10.9963	32.9726	52.6516	46.7056	AT4G28170	NA	AT4G28170	NA
AT3G24480	88.5493	1.81325	0.540904	3.35225	0.000801562	0.00389189	11.8677	2.5344	4.12362	23.8767	15.3567	23.8497	AT3G24480	NA	AT3G24480	NA
AT3G08920	26.8486	1.81324	0.536088	3.38236	0.000718666	0.00355572	2.96693	7.6032	10.9963	19.3288	25.2289	31.7996	AT3G08920	NA	AT3G08920	NA
AT1G52670	189.923	1.81282	0.283893	6.38558	1.70749e-10	4.3652e-09	40.0535	79.8336	90.7196	208.069	196.347	337.871	AT1G52670	BADC2, BLP1	AT1G52670	NA
AT4G00490	79.9472	1.81249	0.318634	5.68831	1.28303e-08	2.27775e-07	23.7354	17.7408	13.7454	60.2604	65.8145	66.5804	AT4G00490	BAM2, BMY9	AT4G00490	Encodes a chloroplast beta-amylase. The enzyme activity is very weak compared to BAM1 and BAM3. Mutant of BAM2 has no visible phenotype.
AT3G14310	2046.72	1.8112	0.418571	4.3271	1.51083e-05	0.000123889	35.6031	45.6192	45.3598	90.959	98.7217	254.397	AT3G14310	ATPME3, OZS2, PME3	AT3G14310	encodes a pectin methylesterase, targeted by a cellulose binding protein (CBP) from the parasitic nematode Heterodera schachtii during parasitism.
AT3G58940	33.6055	1.80926	0.626029	2.89005	0.00385182	0.01446	5.93385	1.2672	4.12362	12.5069	12.066	13.9123	AT3G58940	NA	AT3G58940	NA
AT5G25620	35.0705	1.80826	0.428072	4.2242	2.39787e-05	0.000186065	10.3842	11.4048	10.9963	37.5206	27.4227	49.6869	AT5G25620	AtYUC6, YUC6	AT5G25620	NA
AT5G02180	148.224	1.80487	0.489467	3.68743	0.000226533	0.00131689	7.41732	3.8016	10.9963	10.2329	20.8413	44.7182	AT5G02180	NA	AT5G02180	NA
AT5G10160	80.0031	1.80057	0.419024	4.29706	1.73078e-05	0.000139598	16.3181	27.8784	20.6181	55.7124	50.4578	120.242	AT5G10160	NA	AT5G10160	NA
AT3G06120	17.2825	1.79975	0.679206	2.64978	0.00805431	0.0267849	4.45039	6.336	1.37454	18.1918	6.58145	17.8873	AT3G06120	MUTE	AT3G06120	Encodes a basic helix-loop-helix (bHLH) protein that controls meristemoid differentiation during stomatal development. In the absence of MUTE, meristemoids abort after excessive asymmetric divisions and fail to differentiate stomata.
AT3G16100	39.7056	1.79973	0.543649	3.31046	0.000931414	0.00439669	2.96693	7.6032	5.49816	17.0548	24.132	15.8998	AT3G16100	ATRAB7D, ATRABG3C, RABG3c	AT3G16100	NA
AT5G07000	178.638	1.7971	0.233131	7.70856	1.27244e-14	6.60715e-13	93.4582	62.0928	96.2178	328.59	287.39	256.384	AT5G07000	ATST2B, ST2B	AT5G07000	Encodes a member of the sulfotransferase family of proteins. Although it has 85% amino acid identity with ST2A (At5g07010), this protein is not able to transfer a sulfate group to 11- or 12-hydroxyjasmonic acid in vitro. It may be able to act on structurally related jasmonates.
AT1G13930	175.241	1.79516	0.218976	8.19799	2.44441e-16	1.61162e-14	91.9747	88.704	67.3525	329.726	258.87	272.284	AT1G13930	NA	AT1G13930	Involved in response to salt stress. Knockout mutants are hypersensitive to salt stress.
AT4G01450	270.681	1.79081	0.504597	3.54899	0.000386711	0.00208468	8.90078	8.8704	2.74908	19.3288	15.3567	35.7745	AT4G01450	UMAMIT30	AT4G01450	NA
AT5G61300	96.0899	1.79072	0.346453	5.16873	2.3569e-07	3.05361e-06	22.252	29.1456	34.3635	83.0001	63.6207	150.054	AT5G61300	NA	AT5G61300	NA
AT2G24550	41.3251	1.7885	0.485029	3.68741	0.000226545	0.00131689	19.285	36.7488	24.7417	46.6165	126.144	107.324	AT2G24550	NA	AT2G24550	NA
AT3G12203	17.0154	1.78835	0.70016	2.5542	0.0106432	0.033557	10.3842	6.336	9.62178	21.6028	10.9691	57.6367	AT3G12203	scpl17	AT3G12203	NA
AT5G07190	547.569	1.78483	0.451746	3.95097	7.78349e-05	0.000516229	792.17	273.715	269.41	2009.06	1444.63	1144.79	AT5G07190	ATS3	AT5G07190	Gene is expressed preferentially in the embryo and encodes a unique protein of unknown function.
AT2G22230	80.7241	1.78389	0.426558	4.18206	2.88878e-05	0.00021882	22.252	12.672	16.4945	29.5617	57.0392	88.4426	AT2G22230	NA	AT2G22230	NA
AT4G03280	497.5	1.78355	0.146381	12.1843	3.77001e-34	1.60771e-31	262.573	234.432	279.032	909.59	876.43	883.432	AT4G03280	PETC, PGR1	AT4G03280	Encodes the Rieske FeS center of cytochrome b6f complex. Gene is expressed in shoot but not in root. Mutant has reduced electron transport at saturating light intensities and Q-cycle activity is hypersensitive to acidification of the thylakoid lumen.
AT5G25020	24.8756	1.78353	0.544644	3.27467	0.00105786	0.00490462	2.96693	7.6032	10.9963	29.5617	18.6474	26.8309	AT5G25020	NA	AT5G25020	NA
AT1G31040	22.607	1.77778	0.633647	2.80563	0.00502176	0.018054	2.96693	11.4048	4.12362	18.1918	17.5505	28.8184	AT1G31040	ORE15, PLATZ3	AT1G31040	NA
AT3G50350	161.087	1.7761	0.271254	6.54774	5.84144e-11	1.64438e-09	103.842	115.315	83.8469	482.083	338.945	218.622	AT3G50350	NA	AT3G50350	NA
AT1G09780	193.709	1.77549	0.430655	4.12277	3.74342e-05	0.000274968	13.3512	22.8096	16.4945	22.7398	62.5238	95.3988	AT1G09780	iPGAM1	AT1G09780	NA
AT4G21280	76.5548	1.77489	0.561554	3.16067	0.00157405	0.00684502	20.7685	3.8016	23.3672	50.0275	30.7134	81.4864	AT4G21280	PSBQ, PSBQ-1, PSBQA	AT4G21280	Encodes the PsbQ subunit of the oxygen evolving complex of photosystem II.
AT2G39730	514.181	1.77434	0.138859	12.778	2.17628e-37	1.21165e-34	130.545	169.805	180.065	504.823	573.683	569.411	AT2G39730	RCA	AT2G39730	Rubisco activase, a nuclear-encoded chloroplast protein that consists of two isoforms arising from alternative splicing in most plants. Required for the light activation of rubisco.
AT1G01110	139.665	1.77378	0.317536	5.58608	2.32258e-08	3.89226e-07	23.7354	36.7488	20.6181	55.7124	94.3341	128.192	AT1G01110	IQD18	AT1G01110	NA
AT5G05690	534.672	1.7736	0.223513	7.93509	2.10337e-15	1.23269e-13	166.148	169.805	166.319	401.357	504.578	809.896	AT5G05690	CBB3, CPD, CYP90, CYP90A, CYP90A1, DWF3	AT5G05690	Encodes a member of the CP90A family, a cytochrome P450 monooxygenase which converts 6-deoxocathasterone to 6-deoxoteasterone in the late C6 oxidation pathway and cathasterone to teasterone in the early C6 oxidation pathway of brassinolide biosynthesis. Expressed in cotyledons and leaves. Mutants display de-etiolation and derepression of light-induced genes in the dark, dwarfism, male sterility a…
AT1G60800	139.839	1.77227	0.376212	4.71084	2.46699e-06	2.48347e-05	40.0535	36.7488	20.6181	62.5343	92.1403	176.885	AT1G60800	AtNIK3, CIK1, NIK3	AT1G60800	NA
AT3G57062	43.5248	1.77159	0.704476	2.51476	0.0119112	0.0368023	0	5.0688	2.74908	6.82193	14.2598	6.95616	AT3G57062	NA	AT3G57062	NA
AT5G12300	17.3799	1.76575	0.6249	2.82565	0.00471847	0.0171606	16.3181	8.8704	21.9926	75.0412	25.2289	59.6242	AT5G12300	NA	AT5G12300	NA
AT2G26910	253.161	1.76451	0.290485	6.07434	1.24501e-09	2.73315e-08	19.285	51.9552	41.2362	113.699	100.916	170.923	AT2G26910	ABCG32, AtABCG32, ATPDR4, PDR4, PEC1	AT2G26910	NA
AT1G49938	12.6401	1.76405	0.605419	2.91377	0.00357096	0.0135657	7.41732	6.336	9.62178	38.6576	21.9382	18.881	AT1G49938	NA	AT1G49938	NA
AT2G45450	13.5978	1.76079	0.718928	2.44919	0.0143178	0.0427616	0	8.8704	4.12362	21.6028	13.1629	10.9311	AT2G45450	ZPR1	AT2G45450	ZPR1, a small leucine zipper-containing protein that interacts with REV HD-ZIPIII and is involved in the establishment of leaf polarity.
AT3G23000	19.9887	1.75928	0.721344	2.43889	0.0147326	0.0437081	0	5.0688	12.3709	6.82193	19.7443	32.7933	AT3G23000	ATSR2, ATSRPK1, CIPK7, PKS7, SnRK3.10	AT3G23000	Encodes a serine/threonine protein kinase with similarities to CBL-interacting protein kinases, SNF1 and SOS2.
AT5G19740	565.816	1.75823	0.266146	6.60628	3.94091e-11	1.15648e-09	123.127	172.339	114.087	313.809	363.077	709.528	AT5G19740	LAMP1	AT5G19740	NA
AT1G78990	11.2152	1.75757	0.658098	2.67068	0.00756968	0.0254904	7.41732	13.9392	8.24724	38.6576	38.3918	23.8497	AT1G78990	NA	AT1G78990	NA
AT2G34930	84.2526	1.75635	0.369219	4.75695	1.96541e-06	2.02846e-05	37.0866	31.68	16.4945	79.5892	69.1052	138.129	AT2G34930	NA	AT2G34930	NA
AT1G56340	1986.19	1.75466	0.237483	7.38859	1.48399e-13	6.438e-12	247.738	240.768	180.065	592.371	630.722	1031.5	AT1G56340	AtCRT1a, CRT1, CRT1a	AT1G56340	Encodes one of three Arabidopsis calreticulins. In CRT-deficient mouse fibroblasts, this protein restores ER Ca2+ levels.
AT3G17010	16.1155	1.75383	0.526691	3.3299	0.000868781	0.00415089	13.3512	13.9392	16.4945	60.2604	55.9423	31.7996	AT3G17010	REM22	AT3G17010	transcriptional factor B3 family protein, contains Pfam profile PF02362: B3 DNA binding domain. Activated by AGAMOUS ina a cal-1, ap1-1 background. Expressed in stamen primordia, the placental region of developing carpels and the ovary.
AT2G47650	65.6435	1.75278	0.516809	3.39154	0.000695017	0.00346264	10.3842	36.7488	17.869	44.3425	80.0743	96.3925	AT2G47650	UXS4	AT2G47650	encodes a protein similar to UDP-glucuronic acid decarboxylase. UDP-glucuronic acid decarboxylase produces UDP-xylose, which is a substrate for many cell wall carbohydrates including hemicellulose and pectin. UDP-xylose is also known to feedback regulate several cell wall biosynthetic enzymes.
AT3G47690	29.4766	1.75203	0.560225	3.12737	0.00176381	0.0075265	2.96693	7.6032	4.12362	18.1918	17.5505	14.9061	AT3G47690	AtEB1a, ATEB1H2, EB1A	AT3G47690	encodes a homolog of animal microtubule-end-binding protein. There are two other members of this family. EB1 forms foci at regions where the minus ends of microtubules are gathered during mitosis and early cytokinesis.
AT3G05490	15.5079	1.75148	0.683133	2.5639	0.0103504	0.0328605	5.93385	10.1376	4.12362	28.4247	27.4227	12.9186	AT3G05490	RALFL22	AT3G05490	Member of a diversely expressed predicted peptide family showing sequence similarity to tobacco Rapid Alkalinization Factor (RALF), and is believed to play an essential role in the physiology of Arabidopsis. Consists of a single exon and is characterized by a conserved C-terminal motif and N-terminal signal peptide.
AT1G17360	57.3313	1.74711	0.397125	4.39939	1.08556e-05	9.29425e-05	17.8016	13.9392	12.3709	36.3836	43.8763	66.5804	AT1G17360	NA	AT1G17360	NA
AT3G48140	977.493	1.74685	0.327037	5.34144	9.22114e-08	1.33347e-06	17.8016	16.4736	20.6181	44.3425	42.7794	95.3988	AT3G48140	NA	AT3G48140	NA
AT5G02160	52.6182	1.74645	0.397884	4.38933	1.13698e-05	9.64936e-05	37.0866	32.9472	21.9926	94.37	85.5588	128.192	AT5G02160	FIP	AT5G02160	NA
AT3G14870	297.804	1.74422	0.219054	7.9625	1.68597e-15	1.00571e-13	66.7559	51.9552	43.9853	139.85	168.924	232.534	AT3G14870	NA	AT3G14870	NA
AT1G21980	520.919	1.74389	0.328193	5.31362	1.0747e-07	1.52335e-06	38.5701	76.032	50.858	128.48	116.272	311.04	AT1G21980	ATPIP5K1, ATPIPK1, PIP5K1	AT1G21980	Type I phosphatidylinositol-4-phosphate 5-kinase. Preferentially phosphorylates PtdIns4P. Induced by water stress and abscisic acid in Arabidopsis thaliana. Expressed in procambial cells of leaves, flowers and roots. A N-terminal Membrane Occupation and Recognition Nexus (MORN)affects enzyme activity and distribution.
AT2G41800	105.924	1.74322	0.364672	4.78025	1.75082e-06	1.83342e-05	34.1197	17.7408	32.989	56.8494	83.365	141.111	AT2G41800	TEB	AT2G41800	NA
AT3G23760	22.6495	1.74304	0.622401	2.80051	0.00510225	0.018304	2.96693	15.2064	10.9963	39.7946	15.3567	43.7244	AT3G23760	NA	AT3G23760	NA
AT1G09867	218.889	1.74283	0.269774	6.46034	1.04471e-10	2.78447e-09	28.1858	17.7408	28.8653	83.0001	72.3959	92.4175	AT1G09867	NA	AT1G09867	NA
AT1G23000	153.636	1.74266	0.263517	6.61311	3.76329e-11	1.10923e-09	56.3716	60.8256	46.7344	178.507	152.47	217.628	AT1G23000	AtHMP05	AT1G23000	NA
AT1G11670	362.492	1.74052	0.206716	8.41983	3.77018e-17	2.80913e-15	26.7023	41.8176	56.3561	118.247	164.536	137.136	AT1G11670	NA	AT1G11670	NA
AT3G50240	37.8648	1.73707	0.474599	3.66009	0.000252128	0.00144136	1.48346	19.008	9.62178	28.4247	31.8103	42.7307	AT3G50240	KICP-02	AT3G50240	Encodes a kinesin-related protein.
AT1G01140	343.153	1.73694	0.249736	6.95511	3.52281e-12	1.23873e-10	31.1527	63.36	57.7307	127.343	228.157	156.017	AT1G01140	CIPK9, PKS6, SnRK3.12	AT1G01140	Encodes a CBL-interacting protein kinase with similarity to SOS2
AT1G65150	41.1387	1.73666	0.556773	3.11914	0.00181378	0.00769876	7.41732	12.672	5.49816	23.8767	10.9691	50.6806	AT1G65150	NA	AT1G65150	NA
AT1G50750	8.82913	1.73472	0.64975	2.66983	0.00758896	0.0255468	2.96693	6.336	8.24724	14.7808	25.2289	18.881	AT1G50750	NA	AT1G50750	NA
AT1G23880	21.6137	1.73451	0.544526	3.18536	0.00144575	0.00637279	10.3842	11.4048	4.12362	14.7808	27.4227	43.7244	AT1G23880	NA	AT1G23880	NA
AT3G63530	117.423	1.73412	0.426089	4.06986	4.70423e-05	0.000334826	20.7685	20.2752	12.3709	35.2466	35.1011	106.33	AT3G63530	BB, BB2, CTL19, EOD1	AT3G63530	Encodes a novel E3 ubiquitin ligase that acts as a central negative regulator of Arabidopsis floral organ size. Organ size is limited by restricting the period of proliferative growth, rather than the rate of growth and appears to act in a novel pathway, independent of ANT and JAG. Both mRNA and protein are expressed in all actively growing regions of the plant and the vasculature and the protein…
AT4G17100	16.2054	1.73403	0.665105	2.60715	0.0091299	0.0296485	8.90078	1.2672	5.49816	11.3699	15.3567	23.8497	AT4G17100	NA	AT4G17100	NA
AT2G43360	158.421	1.732	0.369858	4.68287	2.82891e-06	2.81109e-05	16.3181	32.9472	26.1163	47.7535	73.4928	130.18	AT2G43360	BIO2, BIOB, EMB49	AT2G43360	Catalyzes the conversion of dethiobiotin to biotin.
AT4G11010	2793.45	1.73136	0.218213	7.93423	2.11797e-15	1.23763e-13	584.485	713.434	712.012	1628.17	1738.6	3307.16	AT4G11010	NDPK3	AT4G11010	nucleoside diphosphate kinase 3 (ndpk3), located to the inter-membrane space in mitochondria
AT1G60000	104.98	1.72995	0.299619	5.77381	7.74976e-09	1.45031e-07	17.8016	24.0768	21.9926	83.0001	49.3609	80.4927	AT1G60000	NA	AT1G60000	NA
AT3G61440	929.964	1.72967	0.233238	7.4159	1.20806e-13	5.3099e-12	103.842	145.728	206.181	343.37	524.322	644.935	AT3G61440	ARATH;BSAS3;1, ATCYSC1, CAS-C1, CYSC1	AT3G61440	Encodes a cysteine synthase isomer CysC1. The isomer is however less effective in cysteine biosynthesis. It is involved in beta-cyanoalanine biosynthesis, an intermediate of cyanide detoxification pathway.
AT3G17100	68.5687	1.72466	0.31701	5.44039	5.31639e-08	8.14651e-07	11.8677	30.4128	19.2436	80.7261	63.6207	62.6054	AT3G17100	AIF3	AT3G17100	NA
AT1G02705	12.1851	1.722	0.530027	3.24888	0.00115858	0.00530656	10.3842	10.1376	9.62178	42.0686	30.7134	26.8309	AT1G02705	NA	AT1G02705	NA
AT5G47760	63.1672	1.72119	0.286696	6.00353	1.93078e-09	4.10814e-08	25.2189	24.0768	19.2436	77.3152	82.2681	66.5804	AT5G47760	ATPGLP2, ATPK5, PGLP2	AT5G47760	serine/threonine protein kinase
AT2G20300	357.544	1.72112	0.183319	9.38869	6.07521e-21	7.61035e-19	109.776	116.582	129.207	342.233	330.169	498.856	AT2G20300	ALE2	AT2G20300	Encodes ABNORMAL LEAF SHAPE 2 (ALE2), a receptor-like protein kinase (RLK) with a cluster of basic amino acid residues followed by a cysteine-containing sequence in the putative extracellular domain. Function together with ACR4 (Arabidopsis homolog of the Crinkly4) and ALE1 in positively regulating protoderm-specific gene expression and for the formation of leafy organs. ale2 mutants have various…
AT1G56020	40.3895	1.72029	0.511242	3.36491	0.000765674	0.00375677	10.3842	25.344	21.9926	29.5617	44.9732	116.267	AT1G56020	NA	AT1G56020	NA
AT5G60930	9.05613	1.71957	0.718343	2.39379	0.0166752	0.0484097	1.48346	7.6032	6.8727	10.2329	25.2289	17.8873	AT5G60930	NA	AT5G60930	NA
AT1G56300	373.514	1.71703	0.215397	7.97146	1.56808e-15	9.40989e-14	140.929	150.797	134.705	360.425	414.631	626.054	AT1G56300	DjC53	AT1G56300	NA
AT4G12720	66.6275	1.71676	0.36474	4.70681	2.51624e-06	2.52797e-05	10.3842	25.344	19.2436	65.9453	63.6207	53.6618	AT4G12720	AtNUDT7, GFG1, NUDT7	AT4G12720	Encodes a protein with ADP-ribose hydrolase activity. Negatively regulates EDS1-conditioned plant defense and programmed cell death.
AT1G77200	24.1545	1.71466	0.60444	2.83677	0.00455723	0.0166589	10.3842	12.672	21.9926	39.7946	27.4227	80.4927	AT1G77200	NA	AT1G77200	encodes a member of the DREB subfamily A-4 of ERF/AP2 transcription factor family. The protein contains one AP2 domain. There are 17 members in this subfamily including TINY.
AT1G27380	8.60261	1.70731	0.713509	2.39283	0.016719	0.0484947	13.3512	6.336	4.12362	26.1507	23.0351	27.8246	AT1G27380	RIC2	AT1G27380	encodes a member of a novel protein family that contains contain a CRIB (for Cdc42/Rac-interactive binding) motif required for their specific interaction with GTP-bound Rop1 (plant-specific Rho GTPase). Interacts with Rop1 and is involved in pollen tube growth and function. Protein most similar to RIC4 (family subgroup V). Gene is expressed in all tissues examined.
AT4G24480	168.277	1.70698	0.171897	9.93026	3.07444e-23	4.81415e-21	77.1401	84.9024	75.5997	239.904	293.971	243.466	AT4G24480	NA	AT4G24480	NA
AT3G15680	219.755	1.70688	0.261156	6.53585	6.32487e-11	1.76805e-09	26.7023	29.1456	10.9963	73.9042	74.5898	70.5553	AT3G15680	NA	AT3G15680	NA
AT1G18910	43.7284	1.70568	0.569993	2.99246	0.00276737	0.0110074	5.93385	2.5344	5.49816	9.0959	16.4536	18.881	AT1G18910	BTSL2	AT1G18910	NA
AT1G54385	271.32	1.70564	0.240517	7.09155	1.32615e-12	5.02457e-11	108.293	157.133	133.33	434.329	292.874	575.374	AT1G54385	SINE1	AT1G54385	NA
AT3G49950	12.6062	1.70388	0.715184	2.38243	0.0171989	0.0495925	5.93385	5.0688	6.8727	19.3288	8.77527	29.8121	AT3G49950	NA	AT3G49950	NA
AT3G52310	10.283	1.70113	0.631453	2.694	0.00706009	0.024041	10.3842	11.4048	5.49816	30.6987	26.3258	31.7996	AT3G52310	ABCG27	AT3G52310	NA
AT1G10760	970.83	1.7002	0.261313	6.50638	7.69817e-11	2.11652e-09	161.698	141.926	125.083	292.206	394.887	703.566	AT1G10760	GWD, GWD1, SEX1, SOP, SOP1	AT1G10760	Encodes an &#945;-glucan, water dikinase required for starch degradation. Involved in cold-induced freezing tolerance. Mutations that eliminate the GWD protein or affect the dikinase domain of the enzyme dramatically reduce both the amount of phosphate in the amylopectin and the rate of starch degradation. Mature leaves of these mutants accumulate amounts of starch up to seven times greater than …
AT2G40640	46.7356	1.70005	0.389341	4.36647	1.26272e-05	0.000105983	8.90078	16.4736	10.9963	36.3836	36.198	46.7056	AT2G40640	NA	AT2G40640	NA
AT1G54840	52.6054	1.69852	0.407667	4.16644	3.09393e-05	0.000232776	14.8346	12.672	19.2436	26.1507	57.0392	67.5741	AT1G54840	IDM2, ROS5	AT1G54840	NA
AT1G72810	48.579	1.69807	0.568998	2.98433	0.00284204	0.0112626	17.8016	3.8016	0	18.1918	17.5505	31.7996	AT1G72810	NA	AT1G72810	NA
AT3G09820	1135.85	1.69463	0.255609	6.62979	3.36164e-11	9.96707e-10	313.011	539.827	331.264	965.303	1042.06	1828.48	AT3G09820	ADK1, ATADK1	AT3G09820	Involved in the salvage synthesis of adenylates and methyl recycling
AT1G13710	61.1411	1.69375	0.445881	3.79867	0.000145475	0.000891943	7.41732	11.4048	17.869	27.2877	44.9732	46.7056	AT1G13710	CYP78A5, KLU	AT1G13710	Encodes the cytochrome P450 CYP78A5 monooxygenase. Contributes to the generation of a growth-stimulating signal distinct from the classical phytohormones that prevents proliferation arrest, promoting organ growth.
AT1G30545	32.2252	1.69375	0.52169	3.24666	0.0011677	0.00534219	2.96693	7.6032	15.1199	39.7946	14.2598	29.8121	AT1G30545	NA	AT1G30545	NA
AT5G56790	54.6826	1.68796	0.53062	3.18111	0.0014671	0.00645415	1.48346	11.4048	15.1199	18.1918	25.2289	47.6994	AT5G56790	NA	AT5G56790	NA
AT1G05190	699.57	1.68754	0.325674	5.18168	2.19891e-07	2.87869e-06	167.631	204.019	206.181	318.357	477.155	1065.29	AT1G05190	EMB2394, RPL6	AT1G05190	NA
AT4G12420	356.987	1.68473	0.360045	4.67923	2.8796e-06	2.85722e-05	22.252	21.5424	13.7454	45.4795	60.3299	78.5052	AT4G12420	SKU5	AT4G12420	Encodes a protein of unknown function involved in directed root tip growth. It is a member of 19-member gene family and is distantly related structurally to the multiple-copper oxidases ascorbate oxidase and laccase, though it lacks the copper-binding domains. The protein is glycosylated and GPI-anchored. It is localized to the plasma membrane and the cell wall. The gene is expressed most strongl…
AT1G28600	215.035	1.68432	0.293896	5.73101	9.98363e-09	1.82909e-07	31.1527	26.6112	23.3672	80.7261	102.012	77.5115	AT1G28600	NA	AT1G28600	NA
AT3G43270	31.1372	1.68391	0.598469	2.81369	0.00489758	0.0176996	34.1197	24.0768	16.4945	102.329	75.6867	61.6117	AT3G43270	NA	AT3G43270	NA
AT5G56530	252.019	1.68278	0.275437	6.10949	9.99515e-10	2.23336e-08	48.9543	53.2224	41.2362	135.302	99.8186	224.585	AT5G56530	NA	AT5G56530	NA
AT2G29390	27.7221	1.68255	0.420232	4.00386	6.23166e-05	0.00042672	19.285	22.8096	19.2436	62.5343	57.0392	77.5115	AT2G29390	ATSMO2, ATSMO2-2, SMO2-2	AT2G29390	Encodes a sterol 4-alpha-methyl-oxidase, specifically a 4-alpha-methyl-delta-7-sterol-4alpha-methyl-oxidase.
AT4G35987	43.3337	1.6801	0.425916	3.94467	7.99096e-05	0.000527893	7.41732	10.1376	13.7454	38.6576	26.3258	35.7745	AT4G35987	CaM	AT4G35987	NA
AT4G18620	256.342	1.6781	0.234914	7.14348	9.0998e-13	3.58325e-11	333.779	153.331	193.81	744.727	727.25	700.585	AT4G18620	PYL13, RCAR7	AT4G18620	Encodes a member of the PYR (pyrabactin resistance )/PYL(PYR1-like)/RCAR (regulatory components of ABA receptor) family proteins with 14 members. PYR/PYL/RCAR family proteins function as abscisic acid sensors. Mediate ABA-dependent regulation of protein phosphatase 2Cs ABI1 and ABI2.
AT1G07187	944.966	1.67663	0.143986	11.6443	2.45205e-31	7.67912e-29	339.713	432.115	435.729	1496.28	1103.49	1266.02	AT1G07187	NA	AT1G07187	NA
AT5G07140	32.0659	1.67452	0.688149	2.43336	0.0149593	0.0442618	1.48346	2.5344	12.3709	11.3699	9.87217	30.8058	AT5G07140	NA	AT5G07140	NA
AT5G47900	67.7247	1.67433	0.522258	3.20594	0.00134624	0.00599747	22.252	11.4048	6.8727	76.1782	17.5505	34.7808	AT5G47900	NA	AT5G47900	NA
AT5G65010	188.702	1.67306	0.446665	3.74568	0.000179908	0.00106982	19.285	22.8096	26.1163	35.2466	39.4887	142.104	AT5G65010	ASN2	AT5G65010	Encodes asparagine synthetase (ASN2).
AT4G24170	7.49161	1.67279	0.692124	2.41689	0.0156537	0.0459031	7.41732	7.6032	5.49816	17.0548	28.5196	19.8747	AT4G24170	NA	AT4G24170	NA
AT5G66940	29.8977	1.6706	0.35479	4.7087	2.49299e-06	2.50587e-05	16.3181	25.344	19.2436	64.8083	65.8145	64.5929	AT5G66940	ATDOF5.8	AT5G66940	NA
AT3G08880	103.495	1.66869	0.279127	5.97825	2.25549e-09	4.7238e-08	47.4708	53.2224	56.3561	162.589	111.885	224.585	AT3G08880	MUN, MUN1	AT3G08880	NA
AT4G39500	288.64	1.66718	0.348185	4.78821	1.68276e-06	1.76676e-05	23.7354	64.6272	19.2436	76.1782	109.691	158.998	AT4G39500	CYP96A11	AT4G39500	member of CYP96A
AT2G20630	141.954	1.66494	0.334813	4.97274	6.6014e-07	7.71948e-06	22.252	60.8256	71.4761	131.891	202.928	158.004	AT2G20630	PIA1	AT2G20630	NA
AT3G56870	40.1098	1.66381	0.518792	3.20708	0.00134088	0.00597493	11.8677	22.8096	2.74908	26.1507	42.7794	50.6806	AT3G56870	NA	AT3G56870	NA
AT2G01910	219.109	1.66156	0.216249	7.68356	1.54726e-14	7.9174e-13	99.3921	76.032	103.09	252.411	292.874	332.902	AT2G01910	ATMAP65-6, MAP65-6	AT2G01910	Binds microtubules. Induces a crisscross mesh of microtubules, not bundles. Not involved in microtubule polymerization nor nucleation. Localizes to mitochondria.
AT4G16690	51.4585	1.6609	0.403481	4.11642	3.84806e-05	0.000281177	40.0535	16.4736	32.989	88.6851	125.048	67.5741	AT4G16690	ATMES16, MES16	AT4G16690	Encodes a protein shown to have carboxylesterase activity, methyl IAA esterase activity, and methyl jasmonate esterase activity in vitro. This protein does not act on MeSA, MeGA4, or MEGA9 in vitro. Although MES16 is similar to MES17, a MeIAA hydrolase, two mes16 mutant lines (SALK_151578) and (SALK_139756) do not show altered sensitivity to MeIAA in root growth assays. MES16 transcripts appear t…
AT4G20430	101.101	1.65961	0.454434	3.65204	0.000260168	0.0014793	16.3181	45.6192	37.1126	52.3014	77.8805	183.841	AT4G20430	NA	AT4G20430	NA
AT5G20580	26.6675	1.65953	0.633168	2.62099	0.00876754	0.0286856	1.48346	5.0688	5.49816	13.6439	15.3567	9.93737	AT5G20580	NA	AT5G20580	NA
AT5G55230	369.28	1.65891	0.190416	8.71203	2.98475e-18	2.69295e-16	111.26	103.91	133.33	311.535	323.588	463.081	AT5G55230	ATMAP65-1, MAP65-1	AT5G55230	Binds and bundles microtubules. Plays a role in stabilizing anti-parallel microtubules in the central spindle at anaphase to early cytokinesis but is not essential at the midline of the phragmoplast at later stages. The timing with which the MAP65-1 was targeted to the spindle appears to be regulated by a phosphorylation sensitive switch. Enhances microtubule polymerization, promotes nucleation a…
AT4G22758	15.0423	1.6588	0.62183	2.66761	0.00763928	0.025677	7.41732	5.0688	4.12362	15.9178	12.066	23.8497	AT4G22758	NA	AT4G22758	NA
AT5G66550	41.6653	1.65846	0.632408	2.62246	0.00872976	0.0286062	4.45039	10.1376	8.24724	5.68494	20.8413	45.7119	AT5G66550	NA	AT5G66550	NA
AT1G09390	198.824	1.65802	0.382806	4.33123	1.48282e-05	0.000122004	37.0866	19.008	20.6181	34.1096	77.8805	127.198	AT1G09390	NA	AT1G09390	NA
AT4G15910	2500.82	1.65589	0.20708	7.99637	1.28139e-15	7.83221e-14	1167.49	1833.64	1362.17	3497.37	4432.61	5823.3	AT4G15910	ATDI21, DI21	AT4G15910	encodes a gene whose transcript level in root and leaves increases to progressive drought stress. The transcript level is also affected by changes of endogenous or exogenous abscisic acid level. It appears to be a member of plant-specific gene family that includes late embryo-abundant and zinc- IAA-induced proteins in other plants.
AT4G25910	65.6405	1.65589	0.322418	5.13583	2.80901e-07	3.58605e-06	23.7354	20.2752	34.3635	77.3152	58.1361	110.305	AT4G25910	ATCNFU3, NFU3	AT4G25910	Encodes a protein containing the NFU domain that may be involved in iron-sulfur cluster assembly. Part of a five member gene family, more closely related to NFU1 and 2 than to NFU4 and 5. Targeted to the chloroplast.
AT5G57685	223.065	1.65357	0.405407	4.07879	4.52705e-05	0.000324404	4.45039	20.2752	23.3672	46.6165	30.7134	75.524	AT5G57685	ATGDU3, GDU3, LSB1	AT5G57685	Encodes a member of the GDU (glutamine dumper) family proteins involved in amino acid export: At4g31730 (GDU1), At4g25760 (GDU2), At5g57685 (GDU3), At2g24762 (GDU4), At5g24920 (GDU5), At3g30725 (GDU6) and At5g38770 (GDU7).
AT3G13750	100.039	1.65344	0.675392	2.44812	0.0143602	0.0428734	5.93385	2.5344	4.12362	3.41096	14.2598	20.8685	AT3G13750	BGAL1	AT3G13750	beta-galactosidase, glycosyl hydrolase family 35
AT1G22340	49.8437	1.65308	0.440012	3.75689	0.000172038	0.00102961	11.8677	3.8016	12.3709	19.3288	37.2949	29.8121	AT1G22340	AtUGT85A7, UGT85A7	AT1G22340	NA
AT1G70000	447.248	1.65285	0.242835	6.80647	1.0002e-11	3.25967e-10	20.7685	43.0848	52.2325	102.329	112.982	152.042	AT1G70000	MYBD	AT1G70000	NA
AT4G19020	78.9457	1.65082	0.578278	2.85472	0.00430746	0.0159142	1.48346	13.9392	2.74908	7.95892	21.9382	28.8184	AT4G19020	CMT2	AT4G19020	NA
AT2G45190	362.295	1.64954	0.240996	6.84468	7.66496e-12	2.56048e-10	53.4047	57.024	45.3598	144.397	123.951	219.616	AT2G45190	AFO, FIL, YAB1	AT2G45190	Encodes a member of the YABBY family of transcriptional regulators that is involved in abaxial cell type specification in leaves and fruits. YAB1 acts in a non-cell autonomous fashion within the meristem to affect phyllotactic patterning. The non-autonomous effect on the central region of the meristem is mediated through the activity if Lateral Suppressor (LAS).
AT2G18990	149.075	1.64677	0.367894	4.4762	7.59838e-06	6.73273e-05	19.285	29.1456	23.3672	39.7946	66.9114	118.255	AT2G18990	TXND9	AT2G18990	NA
AT2G35780	744.372	1.6462	0.156524	10.5172	7.19795e-26	1.44268e-23	192.85	188.813	197.934	505.96	548.454	757.228	AT2G35780	scpl26	AT2G35780	NA
AT1G13380	419.715	1.64431	0.161947	10.1534	3.2004e-24	5.5298e-22	143.896	168.538	164.945	429.781	450.829	612.142	AT1G13380	NA	AT1G13380	NA
AT4G36180	250.127	1.63853	0.314123	5.21621	1.82625e-07	2.45003e-06	54.8882	38.016	31.6144	83.0001	103.109	198.747	AT4G36180	MUL	AT4G36180	NA
AT5G07200	1295.54	1.63119	0.187858	8.68311	3.85082e-18	3.44562e-16	170.598	226.829	228.174	602.604	593.427	744.309	AT5G07200	ATGA20OX3, GA20OX3, YAP169	AT5G07200	encodes a gibberellin 20-oxidase.
AT3G56160	106.44	1.63014	0.387901	4.20246	2.64028e-05	0.000202367	16.3181	17.7408	23.3672	32.9726	65.8145	78.5052	AT3G56160	NA	AT3G56160	NA
AT1G09210	1065.63	1.62132	0.281804	5.75335	8.74922e-09	1.61623e-07	137.962	152.064	127.832	344.507	400.371	540.593	AT1G09210	AtCRT1b, CRT1b, CRT2	AT1G09210	Encodes one of three Arabidopsis calreticulins.
AT5G08515	58.431	1.61921	0.527652	3.0687	0.00214989	0.00887544	8.90078	8.8704	5.49816	12.5069	17.5505	40.7432	AT5G08515	NA	AT5G08515	NA
AT3G45600	285.881	1.61905	0.303698	5.33111	9.76118e-08	1.39945e-06	78.6236	119.117	107.214	169.411	283.002	484.944	AT3G45600	TET3	AT3G45600	Member of TETRASPANIN family
AT2G27280	14.4396	1.61878	0.533013	3.03704	0.00238914	0.00973285	16.3181	10.1376	15.1199	45.4795	31.8103	49.6869	AT2G27280	NA	AT2G27280	NA
AT4G18370	43.4615	1.61691	0.473256	3.41656	0.000634174	0.0032017	14.8346	19.008	24.7417	45.4795	53.7485	80.4927	AT4G18370	DEG5, DEGP5, HHOA	AT4G18370	Encodes DEG5. Forms a hexamer with DEG8 in the thylakoid lumen. Involved in the cleavage of photodamaged D2 protein of photosystem II (PSII).
AT1G70560	64.4883	1.61641	0.38839	4.16183	3.1571e-05	0.000236907	14.8346	12.672	10.9963	55.7124	30.7134	31.7996	AT1G70560	CKRC1, SAV3, TAA1, TIR2, WEI8	AT1G70560	TAA1 is involved in the shade-induced production of indole-3-pyruvate (IPA), a precursor to IAA, a biologically active auxin. It is also involved in regulating many aspects of plant growth and development from embryogenesis to flower formation and plays a role in ethylene-mediated signaling. This enzyme can catalyze the formation of IPA from L-tryptophan. Though L-Trp is expected to be the prefer…
AT4G12690	69.7231	1.61585	0.543547	2.9728	0.00295099	0.0116225	7.41732	6.336	5.49816	38.6576	9.87217	10.9311	AT4G12690	NA	AT4G12690	NA
AT2G39415	121.288	1.61569	0.390177	4.14091	3.45934e-05	0.000257084	13.3512	11.4048	4.12362	34.1096	29.6165	24.8434	AT2G39415	NA	AT2G39415	NA
AT4G13050	36.8336	1.61169	0.593189	2.717	0.00658767	0.0226672	4.45039	0	15.1199	11.3699	16.4536	30.8058	AT4G13050	FATA2	AT4G13050	NA
AT1G03290	54.9529	1.61096	0.545212	2.95474	0.00312936	0.0121813	4.45039	25.344	8.24724	22.7398	65.8145	29.8121	AT1G03290	NA	AT1G03290	NA
AT3G27230	314.774	1.60988	0.313362	5.13744	2.785e-07	3.56221e-06	32.6362	62.0928	64.6034	109.151	122.854	255.39	AT3G27230	NA	AT3G27230	NA
AT3G13960	2014.15	1.60781	0.193068	8.32771	8.24244e-17	5.81701e-15	430.204	603.187	497.583	1207.48	1361.26	2099.77	AT3G13960	AtGRF5, GRF5	AT3G13960	Growth regulating factor encoding transcription activator. One of the nine members of a GRF gene family, containing nuclear targeting domain. Involved in leaf development and expressed in root, shoot and flower.
AT1G45249	164.182	1.60537	0.166049	9.66805	4.1216e-22	5.81755e-20	108.293	122.918	111.338	366.11	344.429	333.896	AT1G45249	ABF2, AREB1, AtABF2, ATAREB1	AT1G45249	Leucine zipper transcription factor that binds to the abscisic acid (ABA)responsive element (ABRE) motif in the promoter region of ABA-inducible genes. Enhances drought tolerance in vegetative tissues. Required for normal glucose response. Localized in the nucleus. Expressed constitutively in roots, leaf vascular tissues, and hydathodes or in all tissues under stress conditions. It's phosphorylat…
AT3G06500	142.139	1.60382	0.309724	5.17823	2.24e-07	2.92103e-06	44.5039	68.4288	64.6034	118.247	248.998	173.904	AT3G06500	A/N-InvC	AT3G06500	NA
AT2G39420	2221.73	1.60214	0.166989	9.59428	8.45038e-22	1.16007e-19	255.156	380.16	406.864	868.659	1044.26	1255.09	AT2G39420	MAGL8	AT2G39420	NA
AT2G24300	54.57	1.59999	0.488655	3.27427	0.00105936	0.0049079	16.3181	32.9472	30.2399	43.2055	58.1361	140.117	AT2G24300	NA	AT2G24300	NA
AT5G05490	15.9213	1.59669	0.618271	2.58251	0.00980852	0.0314346	5.93385	8.8704	5.49816	9.0959	30.7134	21.8622	AT5G05490	AtREC8, DIF1, REC8, SYN1	AT5G05490	Encodes a RAD21-like gene essential for meiosis. Encodes a 627 a.a. protein that is slightly longer in the N-terminus than SYN1 BP5., Encodes a RAD21-like gene essential for meiosis. Encodes a 617 a.a. protein that is slightly shorter in the N-terminus than SYN1 BP2.
AT3G02870	111.108	1.59652	0.444485	3.59183	0.000328361	0.00180657	16.3181	10.1376	6.8727	30.6987	38.3918	30.8058	AT3G02870	VTC4	AT3G02870	Encodes a L-galactose-1-phosphate phosphatase, involved in ascorbate biosynthesis.
AT4G14200	32.1655	1.59436	0.62667	2.54418	0.0109535	0.0343894	8.90078	21.5424	6.8727	12.5069	24.132	76.5177	AT4G14200	NA	AT4G14200	NA
AT2G43010	352.501	1.59335	0.159847	9.96796	2.10503e-23	3.45828e-21	120.161	164.736	148.45	378.617	434.376	497.862	AT2G43010	AtPIF4, PIF4, SRL2	AT2G43010	Isolated as a semidominant mutation defective in red -light responses. Encodes a nuclear localized bHLH protein that interacts with active PhyB protein. Negatively regulates phyB mediated red light responses. Involved in shade avoidance response. Protein abundance is negatively regulated by PhyB.
AT3G52180	627.031	1.59316	0.160218	9.94373	2.68586e-23	4.23879e-21	281.858	280.051	313.395	766.33	775.514	1097.09	AT3G52180	ATPTPKIS1, ATSEX4, DSP4, SEX4	AT3G52180	Encodes a plant-specific protein phosphatase that contains a protein tyrosine phosphatase (PTP) catalytic domain and a kinase interaction sequence (KIS) domain. This protein interacts with the plant SnRK AKIN11. Binds starch. Localized in the chloroplast.
AT5G19170	18.5051	1.59282	0.656524	2.42614	0.0152605	0.0449936	14.8346	6.336	1.37454	13.6439	14.2598	38.7557	AT5G19170	NA	AT5G19170	NA
AT2G45300	152.56	1.59201	0.427038	3.72803	0.000192979	0.00113962	20.7685	25.344	20.6181	21.6028	65.8145	113.286	AT2G45300	NA	AT2G45300	encodes 3-phosphoshikimate 1-carboxyvinyltransferase / 5-enolpyruvylshikimate-3-phosphate / EPSP synthase involved in chorismate biosynthesis
AT1G66470	131.593	1.59192	0.206594	7.70556	1.30269e-14	6.74671e-13	51.9212	51.9552	45.3598	158.041	148.083	144.092	AT1G66470	AtRHD6, RHD6	AT1G66470	NA
AT1G62780	253.551	1.58895	0.28075	5.65966	1.51673e-08	2.63202e-07	109.776	125.453	97.5923	253.548	242.417	504.818	AT1G62780	NA	AT1G62780	NA
AT5G65420	28.5739	1.58868	0.601889	2.63949	0.00830312	0.0274438	7.41732	12.672	9.62178	21.6028	26.3258	41.737	AT5G65420	CYCD4;1	AT5G65420	Encodes a D-type cyclin CYCD4;1 that physically interacts with CDC2A and is expressed during vascular tissue development, embryogenesis, and formation of lateral root primordia. Its expression is upregulated early during germination.Involved in stomatal cell lineage proliferation in the hypocotyl.
AT4G17770	100.069	1.58725	0.32624	4.86529	1.14287e-06	1.24967e-05	28.1858	7.6032	31.6144	75.0412	54.8454	69.5616	AT4G17770	ATTPS5, TPS5	AT4G17770	Encodes an enzyme putatively involved in trehalose biosynthesis. The protein has a trehalose synthase (TPS)-like domain that may or may not be active as well as a trehalose phosphatase (TPP)-like domain. Phosphorylated TPS5 extracted from Arabidopsis cells binds directly to 14-3-3 isoforms.
AT1G72150	344.239	1.58702	0.204184	7.77249	7.6956e-15	4.1352e-13	89.0078	51.9552	75.5997	185.329	207.316	252.409	AT1G72150	PATL1	AT1G72150	novel cell-plate-associated protein that is related in sequence to proteins involved in membrane trafficking in other eukaryotes
AT1G58520	66.6458	1.58494	0.288061	5.50211	3.75281e-08	5.94135e-07	53.4047	43.0848	42.6107	137.576	142.598	136.142	AT1G58520	RXW8	AT1G58520	NA
AT1G28650	318.595	1.58374	0.251955	6.2858	3.2616e-10	7.85724e-09	47.4708	45.6192	42.6107	101.192	127.241	176.885	AT1G28650	NA	AT1G28650	NA
AT2G20515	193.678	1.58287	0.345929	4.57571	4.74616e-06	4.47658e-05	20.7685	45.6192	32.989	79.5892	62.5238	157.01	AT2G20515	NA	AT2G20515	NA
AT1G28580	683.927	1.57706	0.209754	7.51859	5.53691e-14	2.58084e-12	59.3385	102.643	75.5997	167.137	284.099	261.353	AT1G28580	NA	AT1G28580	NA
AT5G16290	378.402	1.5736	0.241554	6.51447	7.29463e-11	2.01386e-09	89.0078	108.979	98.9669	189.877	288.487	405.445	AT5G16290	AHASS2, AIP3, VAT1	AT5G16290	NA
AT5G47190	503.86	1.57357	0.271558	5.79459	6.84869e-09	1.29498e-07	169.115	144.461	197.934	379.754	378.433	762.196	AT5G47190	PRPL19	AT5G47190	NA
AT2G06520	179.957	1.57302	0.402575	3.90739	9.33002e-05	0.000602842	40.0535	19.008	42.6107	68.2193	68.0083	163.967	AT2G06520	PSBX	AT2G06520	Encodes a protein with sequence similarity to the spinach photosystem II subunit PsbX.
AT1G75680	170.362	1.57254	0.35775	4.39565	1.1044e-05	9.41932e-05	65.2724	97.5744	79.7233	196.699	210.606	315.015	AT1G75680	AtGH9B7, GH9B7	AT1G75680	NA
AT3G18080	1547.04	1.57207	0.264151	5.95143	2.65815e-09	5.47557e-08	456.907	658.944	530.572	1042.62	1351.39	2502.23	AT3G18080	BGLU44	AT3G18080	NA
AT1G70480	69.4517	1.57088	0.354867	4.42668	9.56935e-06	8.28145e-05	13.3512	17.7408	16.4945	40.9316	47.1671	53.6618	AT1G70480	JASSY	AT1G70480	NA
AT1G04940	44.1949	1.56921	0.390313	4.0204	5.81e-05	0.000402106	25.2189	22.8096	10.9963	45.4795	49.3609	79.499	AT1G04940	atTIC20, AtTic20-I, TIC20, Tic20-I	AT1G04940	Tic20 is believed to function as a component of the protein-conducting channel at the inner envelope membrane. Genes AT1G04940 and AT1G04945 were switched for the TAIR7 genome release to give consistency with MIPs annotation.
AT1G31950	60.4332	1.56772	0.399262	3.92654	8.61757e-05	0.000563163	19.285	21.5424	17.869	38.6576	50.4578	84.4676	AT1G31950	NA	AT1G31950	NA
AT1G64390	209.058	1.56657	0.254593	6.15324	7.59147e-10	1.73496e-08	86.0409	73.4976	60.4798	210.343	174.408	265.328	AT1G64390	AtGH9C2, GH9C2	AT1G64390	NA
AT4G32890	70.6631	1.56644	0.361331	4.3352	1.45628e-05	0.000120215	10.3842	25.344	30.2399	46.6165	75.6867	74.5303	AT4G32890	GATA9	AT4G32890	Encodes a member of the GATA factor family of zinc finger transcription factors.
AT2G30200	207.4	1.56621	0.298482	5.24728	1.54365e-07	2.11047e-06	44.5039	34.2144	74.2252	134.165	105.303	211.666	AT2G30200	EMB3147, MCAMT, MCAT	AT2G30200	NA
AT1G21880	275.086	1.56517	0.283812	5.5148	3.49178e-08	5.57655e-07	69.7228	43.0848	37.1126	95.507	132.726	211.666	AT1G21880	LYM1, LYP2	AT1G21880	NA
AT2G05990	376.914	1.56245	0.310584	5.03067	4.88761e-07	5.89779e-06	50.4378	96.3072	76.9742	136.439	179.893	345.82	AT2G05990	ENR1, MOD1	AT2G05990	Encodes enoyl-ACP reductase a component of the fatty acid synthase complex. A reduced function mutation in this gene, mod1, was found in a screen for premature cell death mutants. Mutant plants have reduced lipid level and pleiotropic morphological defects, including chlorotic and abnormally shaped leaves.
AT5G43745	411.368	1.56094	0.287248	5.43411	5.50718e-08	8.40673e-07	63.7889	46.8864	35.738	114.836	98.7217	215.641	AT5G43745	NA	AT5G43745	NA
AT5G66870	53.1737	1.55851	0.366408	4.25348	2.10473e-05	0.000166149	25.2189	12.672	20.6181	48.8905	54.8454	66.5804	AT5G66870	ASL1, LBD36	AT5G66870	Encodes LOB domain protein whose overexpression results in KNOX gene repression. Overexpression also results in plants with hyponastic leaves, downward pointing flowers and reduced apical dominance. May be involved in the transcriptional regulation of the homeobox gene BP (brevipedicellus) during lateral organ differentiation. Acts together with AS2 in proximal-distal symmetry determination.
AT2G43560	61.9043	1.5575	0.408446	3.81324	0.000137159	0.00084613	10.3842	29.1456	15.1199	62.5343	30.7134	69.5616	AT2G43560	NA	AT2G43560	NA
AT4G36880	10590.9	1.55578	0.526187	2.95671	0.00310941	0.0121202	219.553	729.908	347.759	488.905	1917.4	1409.12	AT4G36880	CP1, RDL1	AT4G36880	NA
AT4G30680	104.914	1.5531	0.444281	3.49576	0.000472716	0.00246929	19.285	10.1376	15.1199	40.9316	16.4536	71.5491	AT4G30680	NA	AT4G30680	NA
AT2G32010	117.913	1.54789	0.233684	6.62388	3.49898e-11	1.03437e-09	53.4047	64.6272	87.9706	214.891	165.633	222.597	AT2G32010	CVL1	AT2G32010	Encodes an inositol polyphosphate 5-phosphatase (5PTase). Mediating phosphoinositide signaling. Involved in establishment of foliar vein patterns.
AT3G29370	23.482	1.54569	0.548296	2.81907	0.00481628	0.017472	28.1858	11.4048	10.9963	72.7672	47.1671	26.8309	AT3G29370	P1R3	AT3G29370	NA
AT3G43670	115.017	1.54508	0.366247	4.21868	2.45742e-05	0.000189584	14.8346	10.1376	20.6181	64.8083	39.4887	28.8184	AT3G43670	CuAO&#947;2	AT3G43670	NA
AT2G01150	90.9931	1.54435	0.344143	4.48751	7.20593e-06	6.41049e-05	31.1527	17.7408	16.4945	37.5206	70.2021	80.4927	AT2G01150	RHA2B	AT2G01150	Encodes a RING-H2 finger protein that is expressed in vascular tissue, root tips, embryos and pistils.
AT5G43020	134.57	1.54321	0.384406	4.01454	5.95619e-05	0.000410522	14.8346	26.6112	30.2399	38.6576	59.233	111.299	AT5G43020	NA	AT5G43020	NA
AT5G09670	53.79	1.54231	0.409888	3.76277	0.000168042	0.00100961	26.7023	11.4048	6.8727	50.0275	37.2949	41.737	AT5G09670	NA	AT5G09670	NA
AT1G17650	529.634	1.53927	0.246645	6.24084	4.3522e-10	1.03197e-08	105.326	159.667	156.698	287.658	348.817	590.28	AT1G17650	AtGLYR2, GLYR2, GR2	AT1G17650	Glyoxylate reductase located in chloroplasts.
AT1G65370	44.5096	1.53657	0.54815	2.80319	0.00505997	0.0181751	4.45039	10.1376	2.74908	7.95892	26.3258	16.8935	AT1G65370	NA	AT1G65370	NA
AT3G21250	170.45	1.53649	0.178935	8.58684	8.93958e-18	7.5284e-16	84.5574	77.2992	98.9669	262.644	232.545	260.359	AT3G21250	ABCC8, ATMRP6, MRP6	AT3G21250	member of MRP subfamily
AT5G55180	48.8591	1.5364	0.480379	3.19832	0.00138232	0.00614047	16.3181	10.1376	8.24724	40.9316	39.4887	19.8747	AT5G55180	NA	AT5G55180	NA
AT3G48330	161.636	1.53612	0.201333	7.62977	2.35178e-14	1.16675e-12	74.1732	72.2304	46.7344	186.466	160.149	212.66	AT3G48330	ATPIMT1, PIMT1	AT3G48330	encodes protein-L-isoaspartate methyltransferase. Important for maintaining viability as the seed ages. Involved in germination.
AT1G51950	66.8102	1.53534	0.361861	4.24291	2.20637e-05	0.000173353	25.2189	19.008	15.1199	78.4522	38.3918	54.6555	AT1G51950	IAA18	AT1G51950	NA
AT3G46540	192.995	1.53376	0.215348	7.12221	1.06207e-12	4.12541e-11	51.9212	73.4976	63.2288	150.082	167.827	229.553	AT3G46540	NA	AT3G46540	NA
AT1G80110	51.6687	1.53299	0.328346	4.66884	3.02912e-06	2.9893e-05	32.6362	27.8784	27.4908	55.7124	109.691	88.4426	AT1G80110	ATPP2-B11, PP2-B11	AT1G80110	NA
AT3G51420	236.862	1.53178	0.209494	7.31182	2.63541e-13	1.10045e-11	97.9086	92.5056	147.076	271.74	293.971	408.426	AT3G51420	ATSSL4, SSL4	AT3G51420	Although this enzyme is predicted to encode a strictosidine synthase (SS), it lacks a conserved catalytic glutamate residue found in active SS enzymes and it is not expected to have SS activity.
AT4G28706	104.244	1.5282	0.281561	5.42759	5.71209e-08	8.6733e-07	51.9212	43.0848	60.4798	137.576	170.021	140.117	AT4G28706	NA	AT4G28706	NA
AT2G03240	199.147	1.52709	0.339592	4.49685	6.89687e-06	6.17943e-05	25.2189	17.7408	19.2436	38.6576	43.8763	94.405	AT2G03240	NA	AT2G03240	NA
AT2G46535	15.9656	1.52696	0.465922	3.27729	0.00104808	0.00486605	13.3512	16.4736	17.869	45.4795	39.4887	52.6681	AT2G46535	NA	AT2G46535	NA
AT5G48360	132.724	1.52602	0.326707	4.67092	2.99859e-06	2.96355e-05	26.7023	32.9472	30.2399	46.6165	86.6557	125.211	AT5G48360	FH9	AT5G48360	NA
AT2G36620	2697.74	1.52289	0.265138	5.74376	9.25958e-09	1.7011e-07	572.617	753.984	703.764	1150.63	1547.74	3136.23	AT2G36620	RPL24A	AT2G36620	RPL24A encodes ribosomal protein L24, homolog of cytosolic RPL24, found in archaea and higher eukaryotes. Arabidopsis has two RPL24 homologs, RPL24A (AT2G36620) and RPL24B (AT3G53020).
AT3G59080	28.2548	1.52251	0.597081	2.54992	0.0107746	0.0338968	10.3842	25.344	9.62178	27.2877	83.365	20.8685	AT3G59080	NA	AT3G59080	NA
AT4G01900	205.245	1.52143	0.216934	7.01333	2.32705e-12	8.46482e-11	59.3385	59.5584	78.3488	153.493	167.827	243.466	AT4G01900	GLB1, PII	AT4G01900	encodes a PII protein that may function as part of a signal transduction network involved in perceiving the status of carbon and organic nitrogen. Forms a protein complex with N-acetylglutamate kinase and regulates the kinase activity by relieving the feedback inhibition of the kinase by arginine. Regulates acetyl-CoA carboxylase activity.
AT4G14740	60.5428	1.52111	0.304569	4.9943	5.90484e-07	6.97411e-06	22.252	16.4736	24.7417	55.7124	65.8145	59.6242	AT4G14740	FL3	AT4G14740	NA
AT5G35360	504.687	1.51957	0.235095	6.46365	1.02209e-10	2.73562e-09	161.698	176.141	195.185	408.179	393.79	725.428	AT5G35360	CAC2	AT5G35360	Encodes biotin carboxylase subunit (CAC2).
AT1G66430	132.091	1.51935	0.314033	4.83817	1.31041e-06	1.4098e-05	75.6566	78.5664	52.2325	145.534	174.408	271.29	AT1G66430	FRK3, FRK6	AT1G66430	NA
AT3G54820	186.239	1.5192	0.305433	4.97391	6.56146e-07	7.68174e-06	149.83	204.019	129.207	669.686	398.178	318.99	AT3G54820	PIP2;5, PIP2D	AT3G54820	NA
AT1G49380	168.236	1.51718	0.317017	4.7858	1.70308e-06	1.78716e-05	41.537	72.2304	61.8543	138.713	120.66	244.459	AT1G49380	NA	AT1G49380	NA
AT3G60390	272.153	1.51692	0.272618	5.56425	2.63276e-08	4.34307e-07	75.6566	72.2304	116.836	173.959	220.479	361.72	AT3G60390	HAT3	AT3G60390	Encodes homeobox protein HAT3.
AT3G26650	401.884	1.51206	0.250053	6.04695	1.47611e-09	3.21233e-08	231.42	238.234	218.552	530.973	583.555	847.658	AT3G26650	GAPA, GAPA-1	AT3G26650	Encodes one of the two subunits forming the photosynthetic glyceraldehyde-3-phosphate dehydrogenase (GAPDH) and as such a constituent of the supramolecular complex with phosphoribulokinase (PRK) thought to be linked by a small peptide encoded by CP12-2. GapA-1 is coordinately expressed by light with PRK and CP12-2. The enzyme activity, tested in leaf protein extracts dropped significantly after e…
AT3G15095	907.722	1.51055	0.21775	6.9371	4.0023e-12	1.3951e-10	215.102	274.983	266.661	475.261	662.533	1018.58	AT3G15095	HCF243	AT3G15095	NA
AT2G40475	149.771	1.50903	0.357413	4.2221	2.42041e-05	0.000187451	13.3512	31.68	23.3672	48.8905	53.7485	93.4113	AT2G40475	ASG8	AT2G40475	NA
AT1G29240	385.697	1.50706	0.180421	8.353	6.65495e-17	4.81535e-15	142.413	219.226	228.174	460.48	571.489	647.917	AT1G29240	NA	AT1G29240	NA
AT3G50340	192.986	1.50483	0.258824	5.81413	6.09496e-09	1.16455e-07	47.4708	45.6192	32.989	95.507	100.916	159.992	AT3G50340	NA	AT3G50340	NA
AT3G03780	211.493	1.50264	0.257534	5.83471	5.38848e-09	1.03847e-07	106.809	143.194	89.3451	253.548	324.685	384.576	AT3G03780	ATMS2, MS2	AT3G03780	Encodes a cytosolic methionine synthase, involved in methionine regeneration via the activated methyl cycle (or SAM cycle)
AT3G16570	100.863	1.50145	0.306926	4.89189	9.9874e-07	1.10963e-05	44.5039	92.5056	59.1052	168.274	180.99	208.685	AT3G16570	ATRALF23, RALF23	AT3G16570	Encodes RALF23, a member of a diversely expressed predicted peptide family showing sequence similarity to tobacco Rapid Alkalinization Factor (RALF), and is believed to play an essential role in the physiology of Arabidopsis. Consists of a single exon and is characterized by a conserved C-terminal motif and N-terminal signal peptide. RALF23 is significantly downregulated by brassinolide treatment…
AT2G27190	574.469	1.49825	0.249547	6.00389	1.92644e-09	4.10326e-08	97.9086	153.331	148.45	262.644	318.103	549.537	AT2G27190	ATPAP12, PAP12	AT2G27190	secreted purple acid phosphatase precursor
AT3G16950	248.853	1.49733	0.206736	7.24272	4.39777e-13	1.79155e-11	43.0204	53.2224	57.7307	130.754	127.241	176.885	AT3G16950	LPD1, ptlpd1	AT3G16950	encodes a plastid lipoamide dehydrogenase, subunit of the pyruvate dehydrogenase complex which provides acetyl-CoA for de novo fatty acid biosynthesis. The gene is highly expressed in developing seeds.
AT1G03080	906.282	1.49646	0.172701	8.66504	4.5134e-18	3.98511e-16	376.8	582.912	544.318	1184.74	1609.16	1454.83	AT1G03080	NET1D	AT1G03080	NA
AT1G09600	13.1723	1.49578	0.520372	2.87444	0.00404744	0.0151039	5.93385	11.4048	9.62178	22.7398	23.0351	30.8058	AT1G09600	NA	AT1G09600	NA
AT1G35510	194.725	1.49569	0.306365	4.88206	1.04985e-06	1.16063e-05	28.1858	30.4128	26.1163	42.0686	86.6557	109.311	AT1G35510	NA	AT1G35510	NA
AT1G58350	275.69	1.49301	0.271037	5.50852	3.61866e-08	5.75169e-07	47.4708	65.8944	94.8433	129.617	196.347	260.359	AT1G58350	ZW18	AT1G58350	NA
AT5G66060	82.7883	1.49072	0.464532	3.20908	0.00133158	0.00594276	8.90078	24.0768	28.8653	34.1096	43.8763	96.3925	AT5G66060	NA	AT5G66060	NA
AT4G18690	571.448	1.48905	0.168792	8.82177	1.1266e-18	1.09084e-16	341.197	476.467	461.845	1036.93	1129.82	1428	AT4G18690	NA	AT4G18690	NA
AT2G35810	136.711	1.48861	0.216996	6.86009	6.88155e-12	2.322e-10	50.4378	98.8416	79.7233	204.658	225.963	216.635	AT2G35810	NA	AT2G35810	NA
AT1G66150	157.81	1.48833	0.440142	3.38147	0.000720988	0.00356633	8.90078	7.6032	13.7454	17.0548	23.0351	43.7244	AT1G66150	TMK1	AT1G66150	receptor-like transmembrane kinase I (TMK1)
AT5G51820	388.931	1.48623	0.244503	6.07859	1.21243e-09	2.66747e-08	229.937	242.035	261.163	536.658	592.33	924.175	AT5G51820	ATPGMP, PGM, PGM1, STF1	AT5G51820	Encodes a plastid isoform of the enzyme phosphoglucomutase involved in controlling photosynthetic carbon flow. Effective petiole movement against the direction of the gravity requires functional PGM activity that is required for full development of amyloplasts.
AT3G11630	1334.67	1.48606	0.174824	8.50033	1.89053e-17	1.48015e-15	623.055	593.05	622.667	1526.97	1420.5	2201.13	AT3G11630	2CPA	AT3G11630	Encodes a 2-Cys peroxiredoxin (2-Cys PrxA) that contains two catalytic Cys residues.
AT2G40610	2844.49	1.48535	0.32222	4.60976	4.03142e-06	3.86057e-05	38.5701	34.2144	23.3672	52.3014	81.1712	134.154	AT2G40610	ATEXP8, ATEXPA8, ATHEXP, EXP8, EXPA8	AT2G40610	member of Alpha-Expansin Gene Family. Naming convention from the Expansin Working Group (Kende et al, 2004. Plant Mol Bio). Involved in the formation of nematode-induced syncytia in roots of Arabidopsis thaliana.
AT2G38970	39.6116	1.48351	0.456431	3.25024	0.00115306	0.00528611	5.93385	19.008	12.3709	19.3288	39.4887	46.7056	AT2G38970	NA	AT2G38970	NA
AT2G40260	62.88	1.48349	0.50541	2.93522	0.00333308	0.012813	1.48346	6.336	15.1199	21.6028	12.066	30.8058	AT2G40260	NA	AT2G40260	NA
AT5G25190	771.183	1.48292	0.218686	6.78108	1.19284e-11	3.83143e-10	114.227	182.477	219.926	420.686	434.376	591.274	AT5G25190	ESE3	AT5G25190	encodes a member of the ERF (ethylene response factor) subfamily B-6 of ERF/AP2 transcription factor family. The protein contains one AP2 domain. There are 12 members in this subfamily including RAP2.11.
AT3G17680	87.6967	1.48225	0.407228	3.63986	0.000272783	0.00154359	19.285	50.688	24.7417	67.0823	68.0083	131.173	AT3G17680	NA	AT3G17680	NA
AT2G36800	36.5354	1.48189	0.468681	3.16184	0.00156777	0.00682217	20.7685	31.68	26.1163	75.0412	74.5898	70.5553	AT2G36800	DOGT1, UGT73C5	AT2G36800	Encodes a DON-Glucosyltransferase. The UGT73C5 glucosylates both brassinolide and castasterone in the 23-O position. The enzyme is presumably involved in the homeostasis of those steroid hormones hence regulating BR activity. Transgenic plants overexpressing UGT73C5 show a typical BR-deficient phenotype.
AT1G72470	35.5719	1.47843	0.526752	2.80669	0.00500527	0.0180044	11.8677	8.8704	9.62178	20.4658	31.8103	31.7996	AT1G72470	ATEXO70D1, EXO70D1	AT1G72470	A member of EXO70 gene family, putative exocyst subunits, conserved in land plants. Arabidopsis thaliana contains 23 putative EXO70 genes, which can be classified into eight clusters on the phylogenetic tree.
AT5G12970	17.2559	1.47744	0.566311	2.60889	0.00908363	0.0295365	16.3181	16.4736	16.4945	62.5343	47.1671	27.8246	AT5G12970	MCTP5	AT5G12970	NA
AT3G60530	596.396	1.47599	0.17844	8.27163	1.32138e-16	8.97775e-15	247.738	245.837	309.271	577.59	699.827	953.988	AT3G60530	GATA4	AT3G60530	Encodes a member of the GATA factor family of zinc finger transcription factors.
AT5G54200	41.3011	1.47501	0.550132	2.68119	0.00733598	0.0248454	14.8346	7.6032	20.6181	27.2877	31.8103	59.6242	AT5G54200	WDD1	AT5G54200	NA
AT1G69850	314.309	1.47328	0.245011	6.01311	1.81993e-09	3.90127e-08	51.9212	51.9552	50.858	110.288	127.241	190.798	AT1G69850	AIT1, AtNPF4.6, ATNRT1:2, NPF4.6, NRT1.2, NRT1:2, NTL1	AT1G69850	Encodes an inducible component of low-affinity nitrate uptake. mRNA found primarily in root hairs and the epidermis of roots.
AT1G72890	72.8471	1.47058	0.326517	4.50384	6.67375e-06	6.01447e-05	25.2189	41.8176	53.6071	104.603	146.986	84.4676	AT1G72890	NA	AT1G72890	NA
AT3G04940	218.387	1.46984	0.232265	6.32829	2.47887e-10	6.11871e-09	66.7559	76.032	70.1015	169.411	152.47	267.315	AT3G04940	ATCYSD1, CYSD1	AT3G04940	Encodes cysteine synthase CysD1.
AT5G56220	424.002	1.46892	0.298961	4.91341	8.95054e-07	1.00954e-05	72.6897	70.9632	85.2215	130.754	152.47	348.802	AT5G56220	NA	AT5G56220	NA
AT5G14640	735.098	1.46868	0.137205	10.7043	9.72054e-27	2.16476e-24	180.983	247.104	180.065	501.412	584.652	602.205	AT5G14640	ATSK13, SK13	AT5G14640	NA
AT3G44460	42.9123	1.46819	0.45285	3.24211	0.00118649	0.00541459	50.4378	15.2064	59.1052	108.014	127.241	108.317	AT3G44460	AtbZIP67, DPBF2	AT3G44460	basic leucine zipper transcription factor (BZIP67), identical to basic leucine zipper transcription factor GI:18656053 from (Arabidopsis thaliana); identical to cDNA basic leucine zipper transcription factor (atbzip67 gene) GI:18656052. Located in the nucleus and expressed during seed maturation in the cotyledons.
AT2G22800	12.8984	1.46756	0.579118	2.53413	0.0112726	0.0351708	10.3842	3.8016	5.49816	14.7808	19.7443	18.881	AT2G22800	HAT9	AT2G22800	Encodes homeobox protein HAT9.
AT1G15410	557.298	1.46729	0.160444	9.14517	5.95336e-20	6.48496e-18	180.983	157.133	163.57	540.069	453.023	393.52	AT1G15410	NA	AT1G15410	NA
AT1G14890	31.6296	1.46338	0.423429	3.45602	0.000548206	0.00281808	14.8346	19.008	30.2399	52.3014	43.8763	80.4927	AT1G14890	NA	AT1G14890	NA
AT3G14395	18.1835	1.4631	0.489505	2.98894	0.00279951	0.0111176	17.8016	13.9392	17.869	36.3836	60.3299	39.7495	AT3G14395	MATI	AT3G14395	NA
AT2G19670	110.08	1.46275	0.531701	2.75107	0.0059401	0.0207743	5.93385	2.5344	6.8727	7.95892	13.1629	19.8747	AT2G19670	ATPRMT1A, PRMT1A	AT2G19670	NA
AT5G53550	163.338	1.4618	0.354166	4.12744	3.66831e-05	0.00027011	25.2189	64.6272	48.1089	70.4932	152.47	158.998	AT5G53550	ATYSL3, YSL3	AT5G53550	NA
AT4G09010	28.3152	1.45974	0.433948	3.36386	0.000768611	0.00376657	19.285	17.7408	31.6144	59.1234	66.9114	62.6054	AT4G09010	APX4, TL29	AT4G09010	Encodes a protein that was initially believed to act as a microsomal ascorbate peroxidase APX4 but to date, no evidence of enzymatic activity has been found.
AT4G14096	25.3295	1.45923	0.436776	3.34092	0.000835006	0.00402695	16.3181	15.2064	6.8727	37.5206	37.2949	30.8058	AT4G14096	NA	AT4G14096	NA
AT4G22910	34.2622	1.45909	0.461408	3.16225	0.00156554	0.00681541	17.8016	8.8704	5.49816	26.1507	38.3918	22.856	AT4G22910	CCS52A1, FZR2	AT4G22910	NA
AT1G33790	7097.51	1.45807	0.158686	9.18842	3.98649e-20	4.53984e-18	2087.23	2531.87	2580.01	4976.6	6962.08	7841.58	AT1G33790	NA	AT1G33790	NA
AT1G75240	3579.16	1.45681	0.194426	7.49288	6.73798e-14	3.09746e-12	453.94	721.037	760.121	1414.41	1659.62	2240.88	AT1G75240	AtHB33, HB33, ZHD5	AT1G75240	NA
AT5G48480	81.8253	1.4535	0.351587	4.1341	3.5635e-05	0.000263749	17.8016	15.2064	13.7454	28.4247	42.7794	55.6493	AT5G48480	NA	AT5G48480	NA
AT1G79640	32.767	1.45238	0.367597	3.95101	7.78236e-05	0.000516229	17.8016	15.2064	31.6144	64.8083	59.233	52.6681	AT1G79640	NA	AT1G79640	NA
AT1G19350	73.6448	1.45124	0.320579	4.52695	5.98417e-06	5.48677e-05	17.8016	22.8096	20.6181	39.7946	57.0392	70.5553	AT1G19350	BES1, BZR2	AT1G19350	Encodes brassinosteroid (BR) signalling protein that accumulates in the nucleus as dephosphorylated form in response to BRs. Is phosphorylated by the BIN2 GSK3 kinase. It synergistically interacts with BIM1 to bind to E box sequences (CANNTG). The protein contains a nuclear localization signal (NLS), followed by a highly conserved amino-terminal domain (N) shared by all family members, a BIN2 pho…
AT5G01090	64.3234	1.44995	0.491312	2.95118	0.00316567	0.012294	7.41732	3.8016	9.62178	15.9178	9.87217	29.8121	AT5G01090	NA	AT5G01090	NA
AT3G61460	33.8228	1.44909	0.43068	3.36466	0.00076637	0.00375927	8.90078	22.8096	9.62178	51.1645	34.0042	29.8121	AT3G61460	BRH1	AT3G61460	Encodes a novel ring finger protein and forms an N-terminal hydrophobic domain and a C-terminal RING-H2 signature. Expression is down regulated by brassinolide.
AT3G25400	90.2479	1.44744	0.306414	4.7238	2.31481e-06	2.34796e-05	28.1858	25.344	13.7454	64.8083	69.1052	49.6869	AT3G25400	NA	AT3G25400	NA
AT1G68870	21.7869	1.44579	0.464415	3.11314	0.00185111	0.00783146	5.93385	13.9392	12.3709	31.8357	25.2289	31.7996	AT1G68870	ATSOFL2, SOFL2	AT1G68870	AtSOFL1 acts redundantly with AtSOFL2 as positive regulator of cytokinin levels and cytokinin-mediated development.
AT5G66570	71.4994	1.44366	0.37693	3.83004	0.000128124	0.000797015	19.285	11.4048	21.9926	29.5617	65.8145	46.7056	AT5G66570	MSP-1, OE33, OEE1, OEE33, PSBO-1, PSBO1	AT5G66570	Encodes a protein which is an extrinsic subunit of photosystem II and which has been proposed to play a central role in stabilization of the catalytic manganese cluster. In <i>Arabidopsis thaliana</i> the PsbO proteins are encoded by two genes: <i>psbO1</i> and <i>psbO2</i>. PsbO1 is the major isoform in the wild-type.
AT2G46710	427.989	1.44046	0.144676	9.95649	2.36267e-23	3.85001e-21	252.189	271.181	284.53	651.494	716.281	824.802	AT2G46710	ROPGAP3	AT2G46710	NA
AT1G48220	31.8507	1.4401	0.460208	3.12923	0.00175262	0.00748675	38.5701	22.8096	41.2362	109.151	115.175	53.6618	AT1G48220	NA	AT1G48220	NA
AT4G33110	292.494	1.43851	0.198128	7.2605	3.85661e-13	1.58398e-11	158.731	143.194	156.698	346.781	353.204	540.593	AT4G33110	NA	AT4G33110	NA
AT2G34510	62.7313	1.43847	0.41511	3.46527	0.000529692	0.00273413	14.8346	16.4736	19.2436	19.3288	51.5547	65.5866	AT2G34510	AthB-1	AT2G34510	NA
AT3G51490	19.7116	1.43845	0.504758	2.84978	0.00437497	0.0161161	10.3842	12.672	6.8727	22.7398	31.8103	26.8309	AT3G51490	TMT3	AT3G51490	NA
AT1G01790	75.6618	1.43565	0.392432	3.65834	0.000253855	0.00144834	41.537	27.8784	15.1199	55.7124	68.0083	103.349	AT1G01790	ATKEA1, KEA1	AT1G01790	K efflux antiporter KEA1
AT2G37080	769.733	1.4352	0.277088	5.17957	2.22397e-07	2.9058e-06	173.565	129.254	180.065	252.411	360.883	689.653	AT2G37080	ICR2, RIP2, RIP3	AT2G37080	NA
AT2G23430	46.9666	1.43455	0.378165	3.79346	0.000148562	0.000909479	20.7685	12.672	10.9963	32.9726	47.1671	38.7557	AT2G23430	ICK1, KRP1	AT2G23430	Encodes a cyclin-dependent kinase inhibitor protein that functions as a negative regulator of cell division and promoter of endoreduplication. A member of seven KRP genes found in Arabidopsis thaliana. Differential expression patterns for distinct KRPs were revealed by in situ hybridization. Both SKP2b and RKP appear to be involved in the degradation of KRP1.
AT3G18000	114.662	1.43391	0.513552	2.79214	0.00523603	0.0187403	7.41732	21.5424	28.8653	29.5617	53.7485	73.5365	AT3G18000	AtPMT1, DPR2, NMT1, PEAMT, PEAMT1, XPL1	AT3G18000	Arabidopsis thaliana N-methyltransferase-like protein mRNA. Reduce transmission through pollen.
AT2G03590	247.229	1.43352	0.270516	5.29921	1.16307e-07	1.63818e-06	16.3181	32.9472	24.7417	44.3425	75.6867	81.4864	AT2G03590	ATUPS1, UPS1	AT2G03590	Encodes a member of a class of allantoin transporters.
AT5G26622	145.983	1.43349	0.298064	4.80934	1.51429e-06	1.60842e-05	16.3181	25.344	52.2325	69.3563	82.2681	102.355	AT5G26622	NA	AT5G26622	NA
AT1G10690	155.433	1.4297	0.23283	6.14053	8.22446e-10	1.86685e-08	188.4	130.522	156.698	475.261	479.349	324.952	AT1G10690	SMR8	AT1G10690	NA
AT3G22420	95.8563	1.42905	0.307716	4.64405	3.41642e-06	3.31549e-05	35.6031	26.6112	23.3672	78.4522	72.3959	78.5052	AT3G22420	ATWNK2, WNK2, ZIK3	AT3G22420	Encodes a member of the WNK family (9 members in all) of protein kinases, the structural design of which is clearly distinct from those of other known protein kinases, such as receptor-like kinases and mitogen-activated protein kinases. Its transcription is under the control of circadian rhythms.
AT2G17010	26.4074	1.42904	0.387613	3.68677	0.000227114	0.00131867	14.8346	31.68	30.2399	65.9453	62.5238	79.499	AT2G17010	MSL8	AT2G17010	NA
AT5G66750	87.7305	1.4286	0.468308	3.05056	0.00228418	0.00936615	25.2189	32.9472	16.4945	23.8767	75.6867	101.361	AT5G66750	ATDDM1, CHA1, CHR01, CHR1, DDM1, SOM1, SOM4	AT5G66750	Protein is similar to SWI2/SNF2 chromatin remodeling proteins. DDM1 is appears to act as a chromatin-remodeling ATPase involved in cytosine methylation in CG and non-CG contexts. Involved in gene silencing and maintenance of DNA methylation and histone methylation. Hypomethylation of many genomic regions occurs in ddm1 mutants, and can cause several phenotypic abnormalities, but some loci, such a…
AT3G53420	475.306	1.42768	0.255353	5.59101	2.25747e-08	3.79904e-07	350.097	466.33	394.493	880.029	987.217	1391.23	AT3G53420	AtPIP2;1, PIP2, PIP2;1, PIP2A	AT3G53420	a member of the plasma membrane intrinsic protein subfamily PIP2. localizes to the plasma membrane and exhibits water transport activity in Xenopus oocyte. expressed specifically in the vascular bundles and protein level increases slightly during leaf dev. When expressed in yeast cells can conduct hydrogen peroxide into those cells.
AT1G04430	147.863	1.42688	0.35475	4.02221	5.76545e-05	0.000399713	47.4708	45.6192	71.4761	135.302	122.854	183.841	AT1G04430	NA	AT1G04430	NA
AT2G40010	91.4616	1.42489	0.529916	2.6889	0.00716876	0.0243738	5.93385	19.008	21.9926	29.5617	15.3567	81.4864	AT2G40010	NA	AT2G40010	NA
AT3G50820	52.7682	1.42354	0.477546	2.98094	0.00287367	0.0113693	26.7023	19.008	21.9926	55.7124	52.6516	72.5428	AT3G50820	OEC33, PSBO-2, PSBO2	AT3G50820	Encodes a protein which is an extrinsic subunit of photosystem II and which has been proposed to play a central role in stabilization of the catalytic manganese cluster. In <i>Arabidopsis thaliana</i> the PsbO proteins are encoded by two genes: <i>psbO1</i> and <i>psbO2</i>. PsbO2 is the minor isoform in the wild-type. Mutants defective in this gene have been shown to be affected in the dephospho…
AT3G02730	116.238	1.42268	0.251472	5.65742	1.53668e-08	2.66433e-07	35.6031	48.1536	30.2399	98.9179	99.8186	108.317	AT3G02730	ATF1, TRXF1	AT3G02730	NA
AT4G34250	92.7806	1.42206	0.39975	3.55738	0.000374568	0.00202686	22.252	36.7488	20.6181	47.7535	53.7485	112.292	AT4G34250	KCS16	AT4G34250	Encodes KCS16, a member of the 3-ketoacyl-CoA synthase family involved in the biosynthesis of VLCFA (very long chain fatty acids).
AT5G49390	31.3265	1.42089	0.496605	2.86121	0.00422024	0.015641	10.3842	8.8704	5.49816	15.9178	23.0351	26.8309	AT5G49390	NA	AT5G49390	NA
AT1G30120	88.3304	1.42039	0.459301	3.09249	0.00198483	0.00830868	2.96693	11.4048	8.24724	13.6439	25.2289	22.856	AT1G30120	PDH-E1	AT1G30120	Encodes a putative plastid pyruvate dehydrogenase E1 beta subunit that is distinct from the mitochondrial pyruvate dehydrogenase E1 beta subunit.
AT2G03980	91.0264	1.41987	0.386139	3.67709	0.000235911	0.00136147	28.1858	22.8096	23.3672	29.5617	76.7836	91.4238	AT2G03980	NA	AT2G03980	NA
AT4G36930	344.492	1.4191	0.210758	6.73333	1.65826e-11	5.16896e-10	81.5905	100.109	81.0979	175.096	222.672	305.077	AT4G36930	SPT	AT4G36930	Encodes a transcription factor of the bHLH protein family. Mutants have abnormal, unfused carpels and reduced seed dormancy.
AT1G22980	29.0956	1.41703	0.58744	2.41221	0.0158562	0.0464358	10.3842	6.336	1.37454	22.7398	16.4536	8.94363	AT1G22980	NA	AT1G22980	NA
AT5G06690	47.0818	1.4165	0.448791	3.15625	0.0015981	0.00693454	16.3181	12.672	45.3598	42.0686	71.299	84.4676	AT5G06690	TrxL2.1, WCRKC1	AT5G06690	Encodes a thioredoxin (WCRKC1) localized in chloroplast stroma. Contains a WCRKC motif.
AT1G24880	69.566	1.41637	0.355687	3.98207	6.83189e-05	0.00046136	57.8551	53.2224	64.6034	136.439	206.219	126.205	AT1G24880	AtLpxC2, LpxC2	AT1G24880	NA
AT4G01010	46.4451	1.41562	0.524603	2.69846	0.00696607	0.0237774	29.6693	27.8784	19.2436	35.2466	134.92	34.7808	AT4G01010	ATCNGC13, CNGC13	AT4G01010	member of Cyclic nucleotide gated channel family
AT2G16660	1659.13	1.41544	0.157908	8.96373	3.13883e-19	3.17735e-17	172.082	224.295	200.683	623.069	478.252	495.875	AT2G16660	NA	AT2G16660	NA
AT1G76405	96.7672	1.41496	0.397125	3.56299	0.000366652	0.00198885	8.90078	21.5424	13.7454	29.5617	28.5196	60.618	AT1G76405	NA	AT1G76405	NA
AT1G21070	18.7252	1.41427	0.561177	2.52018	0.0117296	0.0363532	14.8346	16.4736	6.8727	45.4795	31.8103	24.8434	AT1G21070	URGT2	AT1G21070	NA
AT5G48300	1094.12	1.41334	0.177093	7.98078	1.45406e-15	8.80478e-14	523.663	452.391	459.096	1002.82	1149.56	1666.5	AT5G48300	ADG1, APS1	AT5G48300	Encodes the small subunit of ADP-glucose pyrophosphorylase. The small subunit is the catalytic isoform responsible for ADP-glucose pyrophosphorylase activity. The presence of the small subunit is required for large subunit stability. Two isoforms of the small subunit (ApS1 and ApS2) have been described. ApS1 is the major small subunit isoform present in all plant tissues tested.
AT2G21050	87.984	1.41301	0.405944	3.4808	0.00049991	0.0025951	65.2724	43.0848	61.8543	79.5892	153.567	218.622	AT2G21050	LAX2	AT2G21050	Encodes LAX2 (LIKE AUXIN RESISTANT), a member of the AUX1 LAX family of auxin influx carriers. Required for the establishment of embryonic root cell organization.
AT4G28360	524.582	1.41286	0.217581	6.49347	8.38798e-11	2.28114e-09	160.214	228.096	164.945	386.576	398.178	689.653	AT4G28360	NA	AT4G28360	NA
AT5G44660	243.73	1.41165	0.210076	6.7197	1.82095e-11	5.62361e-10	66.7559	79.8336	79.7233	163.726	178.796	259.365	AT5G44660	NA	AT5G44660	NA
AT4G31890	62.3651	1.41008	0.401824	3.50919	0.000449467	0.0023707	29.6693	50.688	63.2288	84.1371	125.048	172.91	AT4G31890	NA	AT4G31890	NA
AT3G19300	30.0914	1.40951	0.382119	3.68867	0.000225427	0.00131172	13.3512	13.9392	13.7454	35.2466	32.9072	40.7432	AT3G19300	NA	AT3G19300	NA
AT1G19950	32.5881	1.40868	0.441444	3.19108	0.00141743	0.00626591	10.3842	15.2064	5.49816	25.0137	25.2289	32.7933	AT1G19950	HVA22H	AT1G19950	NA
AT2G25790	101.658	1.40461	0.35561	3.94986	7.81961e-05	0.000518111	38.5701	22.8096	23.3672	47.7535	68.0083	106.33	AT2G25790	SKM1	AT2G25790	NA
AT1G22160	44.4759	1.40369	0.409019	3.43184	0.000599512	0.0030482	19.285	24.0768	26.1163	34.1096	82.2681	67.5741	AT1G22160	NA	AT1G22160	NA
AT4G09650	178.835	1.40351	0.386499	3.63134	0.00028195	0.00158784	43.0204	58.2912	39.8617	100.055	64.7176	208.685	AT4G09650	ATPD, PDE332	AT4G09650	Encodes the chloroplast ATPase delta-subunit.
AT5G24280	114.362	1.40343	0.258087	5.43782	5.39361e-08	8.24593e-07	48.9543	35.4816	41.2362	104.603	140.404	86.4551	AT5G24280	GMI1	AT5G24280	NA
AT4G31020	27.1233	1.40328	0.5532	2.53665	0.0111918	0.0349731	28.1858	11.4048	13.7454	27.2877	54.8454	57.6367	AT4G31020	NA	AT4G31020	NA
AT5G65450	147.092	1.40316	0.418443	3.35329	0.000798582	0.00388118	13.3512	12.672	10.9963	15.9178	24.132	56.643	AT5G65450	UBP17	AT5G65450	Encodes a ubiquitin-specific protease.
AT1G68530	61.0999	1.39961	0.394083	3.55157	0.000382939	0.00206713	19.285	11.4048	17.869	37.5206	41.6825	47.6994	AT1G68530	AtCER6, AtCUT1, CER6, CUT1, G2, KCS6, POP1	AT1G68530	Encodes KCS6, a member of the 3-ketoacyl-CoA synthase family involved in the biosynthesis of VLCFA (very long chain fatty acids).
AT2G14110	48.6092	1.39917	0.406908	3.43855	0.000584844	0.00298347	13.3512	25.344	5.49816	28.4247	40.5856	48.6931	AT2G14110	NA	AT2G14110	NA
AT2G29670	188.914	1.39892	0.444163	3.14957	0.00163512	0.00706462	16.3181	19.008	13.7454	17.0548	36.198	75.524	AT2G29670	NA	AT2G29670	NA
AT4G34640	80.0909	1.39867	0.422756	3.30847	0.000938083	0.00441949	4.45039	11.4048	12.3709	13.6439	27.4227	33.7871	AT4G34640	ERG9, SQS1	AT4G34640	Encodes squalene synthase, which converts two molecules of farnesyl diphosphate (FPP) into squalene via an intermediate: presqualene diphosphate (PSPP). It is generally thought to be one of the key enzymes of sterol biosynthesis, since it catalyzes the first pathway-specific reaction of the sterol branch of the isoprenoid pathway.
AT4G13345	18.9622	1.39714	0.521671	2.6782	0.00740194	0.025018	11.8677	6.336	5.49816	22.7398	26.3258	12.9186	AT4G13345	MEE55	AT4G13345	NA
AT1G59840	60.125	1.39539	0.49361	2.82692	0.00469987	0.0171178	5.93385	13.9392	28.8653	21.6028	35.1011	71.5491	AT1G59840	CCB4	AT1G59840	NA
AT3G05190	2663.8	1.39479	0.117397	11.8809	1.48735e-32	5.22998e-30	867.826	970.676	980.047	2275.11	2277.18	2859.98	AT3G05190	NA	AT3G05190	NA
AT1G62800	19.7301	1.39234	0.538255	2.58676	0.00968831	0.0311092	13.3512	31.68	8.24724	30.6987	51.5547	58.6305	AT1G62800	ASP4	AT1G62800	Encodes aspartate aminotransferase (Asp4).
AT5G03650	282.876	1.39084	0.185851	7.48363	7.22973e-14	3.30081e-12	62.3055	64.6272	54.9816	123.932	173.311	178.873	AT5G03650	SBE2.2	AT5G03650	Encodes starch branching enzyme (E.C.2.4.1.18) similar to SBE2 from maize and rice. Expressed throughout the plant and highest in seedlings and cauline leaves.
AT1G21750	2713.72	1.39081	0.187675	7.41076	1.25574e-13	5.49538e-12	600.803	722.304	625.416	1340.51	1457.79	2311.43	AT1G21750	ATPDI5, ATPDIL1-1, PDI5, PDIL1-1	AT1G21750	Encodes a protein disulfide isomerase-like (PDIL) protein, a member of a multigene family within the thioredoxin (TRX) superfamily; isoform contains non-consensus GA donor splice site at intron 9. Transcript levels for this gene are up-regulated in response to three different chemical inducers of ER stress (dithiothreitol, beta-mercaptoethanol, and tunicamycin). Neither AtIRE1-2 nor AtbZIP60 appe…
AT1G67940	29.5406	1.3902	0.493738	2.81566	0.00486775	0.0176204	8.90078	10.1376	13.7454	29.5617	16.4536	39.7495	AT1G67940	ABCI17, ATNAP3, AtSTAR1, NAP3	AT1G67940	member of NAP subfamily
AT1G55490	4093.54	1.3894	0.244956	5.67203	1.41116e-08	2.47237e-07	1244.63	1458.55	1421.27	2468.4	2686.33	5649.39	AT1G55490	CPN60B, Cpn60beta1, CPNB1, LEN1	AT1G55490	encodes the beta subunit of the chloroplast chaperonin 60, a homologue of bacterial GroEL. Mutants in this gene develops lesions on its leaves, expresses systemic acquired resistance (SAR) and develops accelerated cell death to heat shock stress. The protein has molecular chaperone activity for suppressing protein aggregation in vitro.
AT5G13710	77.3055	1.38865	0.374069	3.71227	0.000205405	0.00120766	29.6693	35.4816	46.7344	85.2741	72.3959	135.148	AT5G13710	CPH, SMT1	AT5G13710	SMT1 controls the level of cholesterol in plants
AT5G24950	345.944	1.38835	0.256444	5.41386	6.16794e-08	9.28806e-07	443.556	239.501	373.875	1043.75	1070.58	649.904	AT5G24950	CYP71A15	AT5G24950	putative cytochrome P450
AT4G24960	60.7567	1.38729	0.400893	3.4605	0.000539169	0.00277732	26.7023	48.1536	37.1126	77.3152	117.369	99.3737	AT4G24960	ATHVA22D, HVA22D	AT4G24960	Homologous to a eukaryote specific ABA- and stress-inducible gene first isolated from barley. Groups in one subfamily with ATHVA22E. Along with other members of the ATHVA22 family, it may be involved in regulation of autophagy during development.
AT2G24580	49.9268	1.38531	0.369818	3.74593	0.000179729	0.00106925	23.7354	25.344	21.9926	44.3425	48.264	92.4175	AT2G24580	NA	AT2G24580	NA
AT2G05310	121.656	1.38401	0.242424	5.70907	1.13595e-08	2.04563e-07	94.9417	77.2992	79.7233	222.85	189.765	243.466	AT2G05310	NA	AT2G05310	NA
AT2G39870	709.26	1.38153	0.166759	8.28462	1.18483e-16	8.13269e-15	197.301	233.165	279.032	562.809	613.172	673.754	AT2G39870	NA	AT2G39870	NA
AT3G06345	17604.6	1.37944	0.156884	8.79276	1.4593e-18	1.38619e-16	17466.3	21088.8	15864.9	53266.7	39044.4	49275.4	AT3G06345	NA	AT3G06345	NA
AT2G25980	634.094	1.37929	0.303802	4.54007	5.62344e-06	5.19643e-05	204.718	366.221	279.032	452.521	665.823	1094.1	AT2G25980	NA	AT2G25980	NA
AT1G13310	22.9523	1.37867	0.388901	3.54504	0.000392548	0.00211217	26.7023	26.6112	21.9926	68.2193	69.1052	58.6305	AT1G13310	NA	AT1G13310	NA
AT1G21830	63.626	1.37793	0.385881	3.57087	0.000355793	0.00193571	32.6362	25.344	79.7233	135.302	125.048	97.3862	AT1G21830	NA	AT1G21830	NA
AT2G40435	27.8009	1.3762	0.492161	2.79624	0.00517017	0.0185278	13.3512	19.008	8.24724	38.6576	28.5196	38.7557	AT2G40435	NA	AT2G40435	NA
AT1G02440	14.7413	1.37543	0.502234	2.73863	0.00616961	0.0214052	13.3512	19.008	8.24724	32.9726	35.1011	37.762	AT1G02440	ARFD1A, ATARFD1A	AT1G02440	A member of ARF GTPase family. A thaliana has 21 members of this family, known to be essential for vesicle coating and uncoating and functions in GTP-binding. Gene encoding ADP-ribosylation factor and similar to other ARFs and ARF-like proteins.
AT1G31740	40.2613	1.37271	0.381886	3.59456	0.000324944	0.00179171	47.4708	55.7568	28.8653	145.534	88.8496	108.317	AT1G31740	BGAL15	AT1G31740	Encodes a putative &beta;-galactosidase.
AT2G45670	362.066	1.37188	0.166926	8.2185	2.06057e-16	1.37667e-14	151.313	217.959	207.556	396.809	527.613	571.399	AT2G45670	AtLPEAT2, LPEAT2	AT2G45670	NA
AT3G29240	94.9868	1.37097	0.246186	5.56882	2.56466e-08	4.25878e-07	71.2063	79.8336	48.1089	201.247	184.281	131.173	AT3G29240	NA	AT3G29240	NA
AT3G19450	189.65	1.36943	0.225317	6.0778	1.21842e-09	2.67773e-08	41.537	41.8176	34.3635	111.425	82.2681	110.305	AT3G19450	ATCAD4, CAD, CAD-C, CAD4	AT3G19450	Encodes a catalytically active cinnamyl alcohol dehydrogenase which uses p-coumaryl aldehyde as a preferred substrate. It can also use caffeyl, coniferyl and d-hydroxyconiferyl aldehydes as substrates.
AT2G30870	127.487	1.36302	0.483926	2.81659	0.00485359	0.017585	28.1858	45.6192	28.8653	50.0275	116.272	98.38	AT2G30870	ATGSTF10, ATGSTF4, ERD13, GSTF10	AT2G30870	early dehydration-induced gene ERD13 homologous to tobacco and maize glutathione S-transferases. Encodes glutathione transferase belonging to the phi class of GSTs. Naming convention according to Wagner et al. (2002)
AT3G21270	64.205	1.36156	0.294785	4.61883	3.85917e-06	3.71515e-05	26.7023	26.6112	39.8617	62.5343	91.0434	85.4614	AT3G21270	ADOF2, DOF2	AT3G21270	Encodes Dof zinc finger protein adof2.
AT2G20240	25.2019	1.36115	0.478212	2.84634	0.00442244	0.0162551	29.6693	13.9392	21.9926	57.9864	66.9114	42.7307	AT2G20240	TRM17	AT2G20240	NA
AT4G03500	20.3426	1.36074	0.481044	2.82872	0.00467345	0.0170309	25.2189	16.4736	26.1163	67.0823	68.0083	38.7557	AT4G03500	NA	AT4G03500	NA
AT4G21550	95.2774	1.36055	0.26648	5.10565	3.29659e-07	4.12702e-06	50.4378	79.8336	65.9779	185.329	170.021	151.048	AT4G21550	VAL3	AT4G21550	NA
AT3G18800	180.389	1.35677	0.327114	4.14769	3.35851e-05	0.00025024	57.8551	51.9552	53.6071	71.6302	121.757	223.591	AT3G18800	NA	AT3G18800	NA
AT2G05210	83.878	1.35653	0.342245	3.96364	7.38168e-05	0.000494158	22.252	32.9472	27.4908	46.6165	68.0083	97.3862	AT2G05210	ATPOT1, AtPOT1a	AT2G05210	Encodes AtPOT1a, an accessory factor for telomerase required for positive telomere length regulation. Note on nomenclature: different names have been given to Arabidopsis POT-like genes (Kuchar and Fajkus, 2004; Shakirov et al, 2005; Tani and Murata, 2005). According to a unifying nomenclature (Surovtseva et al, 2007), At2g05210 (previously named AtPOT1) is designated AtPOT1a, while At5g06310 (pr…
AT1G56510	20.2825	1.3553	0.417512	3.24613	0.00116985	0.0053484	8.90078	24.0768	15.1199	43.2055	43.8763	37.762	AT1G56510	ADR2, WRR4	AT1G56510	TIR-NB-LRR protein that confers resistance to four races of Albugo candida.
AT1G50010	1354.55	1.35471	0.224763	6.02728	1.6674e-09	3.60515e-08	590.419	664.013	607.547	1285.93	1585.03	1891.08	AT1G50010	TUA2	AT1G50010	Encodes alpha-2,4 tubulin. TUA2 and TUA4 encode identical proteins.
AT1G78730	69.6792	1.35446	0.330758	4.09503	4.22115e-05	0.000305321	20.7685	12.672	21.9926	34.1096	46.0701	59.6242	AT1G78730	NA	AT1G78730	NA
AT5G23580	51.6683	1.35389	0.427873	3.16423	0.00155495	0.00678247	19.285	3.8016	15.1199	18.1918	36.198	40.7432	AT5G23580	ATCDPK9, ATCPK12, CDPK9, CPK12	AT5G23580	unique family of enzymes containing a single polypeptide chain with a kinase domain at the amino terminus and a putative calcium-binding EF hands structure at the carboxyl terminus; recombinant protein is fully active and induced by Ca2+
AT3G61680	381.873	1.35348	0.175235	7.72379	1.12924e-14	5.90948e-13	439.105	337.075	419.235	1165.41	1081.55	805.921	AT3G61680	PLIP1	AT3G61680	NA
AT5G14650	37.1249	1.35319	0.450654	3.00272	0.0026758	0.010737	22.252	30.4128	13.7454	70.4932	48.264	51.6743	AT5G14650	PGLR	AT5G14650	NA
AT4G39120	100.086	1.35134	0.233359	5.79083	7.00391e-09	1.32184e-07	62.3055	36.7488	42.6107	129.617	109.691	119.248	AT4G39120	HISN7, IMPL2	AT4G39120	Encodes a chloroplast-localized member of the myo-inositol monophosphatase family, IMPL2 (myo-Inositol monophosphatase like 2) that seems to have multiple enzymatic activities. It contributes to histidine biosynthesis based on it histidinol-phosphate phosphatase activity. In addition, the protein can act as an inositol monophosphatase and an L-galactose-1-phosphate phosphatase in vitro.
AT5G48660	88.3355	1.35024	0.325371	4.14986	3.32673e-05	0.000248242	14.8346	19.008	26.1163	45.4795	41.6825	65.5866	AT5G48660	NA	AT5G48660	NA
AT2G12170	30.658	1.34961	0.382646	3.52706	0.000420204	0.00223755	20.7685	13.9392	12.3709	43.2055	36.198	39.7495	AT2G12170	NA	AT2G12170	NA
AT1G19850	70.1354	1.34868	0.524159	2.57303	0.0100813	0.0321852	22.252	3.8016	23.3672	20.4658	32.9072	70.5553	AT1G19850	ARF5, IAA24, MP	AT1G19850	Encodes a transcription factor (IAA24) mediating embryo axis formation and vascular development. Similar to AUXIN RESPONSIVE FACTOR 1 (ARF1) shown to bind to auxin responsive elements (AREs), and to the maize transcriptional activator VIVIPAROUS 1( VP1). In situ hybridization shows expression in provascular tissue of embryos, the emerging shoot primordia, then is restricted to provascular tissue,…
AT1G06040	365.117	1.3485	0.170622	7.90342	2.71351e-15	1.57188e-13	219.553	163.469	196.559	525.288	505.675	442.213	AT1G06040	BBX24, STO	AT1G06040	Encodes salt tolerance protein (STO) which confers salt tolerance to yeast cells. Fully complements calcineurin deficient yeast but does not encode a phosphoprotein phosphatase. Sequence has similarities to CONSTANS. STO co-localizes with COP1 and plays a role in light signaling.
AT1G73910	32.6538	1.34754	0.408826	3.29611	0.000980323	0.00458972	25.2189	26.6112	24.7417	48.8905	71.299	74.5303	AT1G73910	ARP4A, ATARP4A	AT1G73910	Encodes a gene similar to actin-related proteins in other organisms. Member of nuclear ARP family of genes. Component of chromatin remodeling complexes, involved in chromatin-mediated gene regulation.
AT1G55340	252.065	1.34651	0.258446	5.21003	1.88812e-07	2.52291e-06	80.107	65.8944	83.8469	155.767	138.21	288.184	AT1G55340	NA	AT1G55340	NA
AT1G07260	114.962	1.34641	0.268787	5.00922	5.46524e-07	6.50861e-06	71.2063	76.032	65.9779	187.603	157.955	196.76	AT1G07260	UGT71C3	AT1G07260	NA
AT5G14920	483.955	1.34619	0.511761	2.63051	0.00852578	0.0280918	77.1401	84.9024	82.4724	84.1371	141.501	395.507	AT5G14920	GASA14	AT5G14920	NA
AT2G42960	111.041	1.34591	0.258479	5.20704	1.91875e-07	2.55532e-06	45.9874	50.688	46.7344	108.014	144.792	112.292	AT2G42960	NA	AT2G42960	NA
AT2G28470	450.575	1.343	0.257919	5.20707	1.91842e-07	2.55532e-06	158.731	131.789	116.836	288.795	254.483	487.925	AT2G28470	BGAL8	AT2G28470	putative beta-galactosidase (BGAL8 gene)
AT2G16365	524.465	1.33821	0.186097	7.19093	6.43535e-13	2.59003e-11	115.71	144.461	141.578	266.055	313.716	436.251	AT2G16365	AtFDA10, PCH1	AT2G16365	NA
AT1G60010	27.5686	1.33767	0.557622	2.39888	0.0164454	0.0478652	10.3842	34.2144	24.7417	60.2604	62.5238	53.6618	AT1G60010	NA	AT1G60010	NA
AT1G78660	199.572	1.33764	0.362043	3.6947	0.00022015	0.00128568	43.0204	44.352	65.9779	110.288	112.982	163.967	AT1G78660	ATGGH1, GGH1	AT1G78660	The Arabidopsis protein AtGGH1 is a gamma-glutamyl hydrolase cleaving pentaglutamates to yield di- and triglutamates. The enzyme is involved in the tetrahydrofolate metabolism and located to the vacuole.
AT4G34590	161.691	1.33614	0.39616	3.37272	0.000744302	0.00366521	10.3842	12.672	5.49816	13.6439	25.2289	32.7933	AT4G34590	ATB2, AtbZIP11, BZIP11, GBF6	AT4G34590	Encodes a basic domain leucine zipper (bZip) transcription factor bZIP11. Translation is repressed by sucrose. Directly regulates gene expression of ASN1 and ProDH2, which are enzyme-coding genes involved in amino acid metabolism.
AT2G34317	26.9631	1.3357	0.543943	2.45559	0.0140652	0.0421387	25.2189	27.8784	34.3635	98.9179	73.4928	48.6931	AT2G34317	NA	AT2G34317	NA
AT1G53440	48.4076	1.33523	0.341784	3.90663	9.35908e-05	0.000604498	25.2189	22.8096	42.6107	94.37	78.9774	55.6493	AT1G53440	NA	AT1G53440	NA
AT3G59060	148.92	1.32975	0.270611	4.91389	8.92855e-07	1.0082e-05	83.074	117.85	159.447	379.754	255.58	272.284	AT3G59060	A-PUT2, bHLHb1, PIF5, PIL6	AT3G59060	Encodes a novel Myc-related bHLH transcription factor, which physically associated with APRR1/TOC1 and is a member of PIF3 transcription factor family. Involved in shade avoidance. Functions as negative regulator of PhyB. Protein levels are modulated by phytochrome B.
AT2G20180	2372.65	1.32894	0.121092	10.9746	5.06132e-28	1.2524e-25	971.669	1073.32	896.2	2445.66	2237.69	2706.94	AT2G20180	PIF1, PIL5	AT2G20180	Encodes a novel Myc-related bHLH transcription factor that has transcriptional activation activity in the dark. It is a key negative regulator of phytochrome-mediated seed germination and acts by inhibiting chlorophyll biosynthesis, light-mediated suppression of hypocotyl elongation and far-red light-mediated suppression of seed germination, and promoting negative gravitropism in hypocotyls. Ligh…
AT3G46580	179.491	1.32893	0.189825	7.00085	2.54411e-12	9.17117e-11	105.326	102.643	76.9742	250.137	213.897	251.415	AT3G46580	ATMBD5, MBD05, MBD5	AT3G46580	Protein containing a putative methyl-CpG-binding domain.Has sequence similarity to human MBD proteins.
AT5G64310	1085.91	1.32773	0.193832	6.84993	7.38866e-12	2.4723e-10	1192.7	1140.48	1132.62	2453.62	3461.84	2783.46	AT5G64310	AGP1, ATAGP1	AT5G64310	Encodes arabinogalactan-protein (AGP1).
AT2G22730	34.4956	1.32498	0.445553	2.9738	0.00294139	0.0115983	17.8016	25.344	8.24724	43.2055	39.4887	46.7056	AT2G22730	NA	AT2G22730	NA
AT4G40060	102.728	1.32391	0.351328	3.76829	0.000164368	0.000991702	16.3181	16.4736	13.7454	38.6576	52.6516	25.8372	AT4G40060	ATHB-16, ATHB16, HB16	AT4G40060	Encodes a homeodomain leucine zipper class I (HD-Zip I) protein.
AT5G60670	1518.93	1.32363	0.41496	3.18978	0.00142383	0.00629278	160.214	325.671	269.41	391.124	427.794	1072.24	AT5G60670	RPL12C	AT5G60670	NA
AT2G17860	11.2202	1.32329	0.552787	2.39386	0.0166723	0.0484083	10.3842	8.8704	15.1199	26.1507	32.9072	26.8309	AT2G17860	NA	AT2G17860	NA
AT4G00990	580.649	1.32286	0.158736	8.33367	7.83712e-17	5.55051e-15	175.049	201.485	217.177	391.124	494.706	599.223	AT4G00990	AtJMJ17, JMJ27	AT4G00990	NA
AT5G01600	1276.21	1.32209	0.232881	5.67711	1.36989e-08	2.40426e-07	591.902	428.314	335.388	1052.85	1060.71	1272.98	AT5G01600	ATFER1, FER1	AT5G01600	Encodes a ferretin protein that is targeted to the chloroplast. Member of a Ferritin gene family. Gene expression is induced in response to iron overload and by nitric oxide. Expression of the gene is downregulated in the presence of paraquat, an inducer of photoxidative stress.
AT1G31330	58.8895	1.31833	0.535962	2.45975	0.0139032	0.0417397	16.3181	22.8096	10.9963	20.4658	32.9072	71.5491	AT1G31330	PSAF	AT1G31330	Encodes subunit F of photosystem I.
AT5G41620	44.1847	1.31681	0.4697	2.80352	0.00505487	0.0181633	29.6693	16.4736	8.24724	21.6028	41.6825	70.5553	AT5G41620	NA	AT5G41620	NA
AT1G63850	379.117	1.31656	0.168174	7.82856	4.93477e-15	2.7098e-13	235.871	269.914	202.057	502.549	569.295	691.641	AT1G63850	NA	AT1G63850	NA
AT3G03640	947.519	1.31557	0.23054	5.70645	1.15355e-08	2.06988e-07	336.746	366.221	371.126	872.07	812.809	988.768	AT3G03640	BGLU25, GLUC	AT3G03640	Encodes beta-glucosidase (GLUC).
AT2G15970	183.902	1.31485	0.323004	4.07069	4.6874e-05	0.000334023	133.512	140.659	164.945	324.042	371.852	396.501	AT2G15970	ATCOR413-PM1, ATCYP19, COR413-PM1, FL3-5A3, WCOR413, WCOR413-LIKE	AT2G15970	encodes an alpha form of a protein similar to the cold acclimation protein WCOR413 in wheat. Expression is induced by short-term cold-treatment, water deprivation, and abscisic acid treatment.
AT3G02210	108.262	1.3136	0.267279	4.91472	8.89081e-07	1.0045e-05	37.0866	36.7488	35.738	71.6302	115.175	85.4614	AT3G02210	COBL1	AT3G02210	NA
AT1G14030	186.528	1.3129	0.269506	4.87149	1.10759e-06	1.21508e-05	87.5244	86.1696	83.8469	171.685	156.858	310.046	AT1G14030	LSMT-L	AT1G14030	NA
AT5G13980	781.442	1.31098	0.196968	6.65582	2.81718e-11	8.42758e-10	311.527	402.97	384.871	710.617	796.355	1221.3	AT5G13980	NA	AT5G13980	NA
AT3G20350	58.5687	1.31036	0.525713	2.49254	0.0126831	0.0387194	4.45039	6.336	9.62178	15.9178	6.58145	27.8246	AT3G20350	NA	AT3G20350	NA
AT4G21590	35.1847	1.30853	0.43431	3.0129	0.00258763	0.0104291	17.8016	35.4816	12.3709	40.9316	59.233	63.5992	AT4G21590	ENDO3	AT4G21590	Encodes a putative endonuclease but no demonstrable endonuclease activity, either towards single stranded DNA or mismatches, has been seen in vitro. Activated by AGAMOUS in a cal-1, ap1-1 background. Expressed in the floral meristem and during stamen development.
AT5G57630	728.159	1.30559	0.157342	8.29778	1.06075e-16	7.34788e-15	351.581	524.621	489.336	916.412	1190.15	1272.98	AT5G57630	CIPK21, SnRK3.4	AT5G57630	CBL-interacting protein kinase
AT5G09995	33.0166	1.30466	0.529041	2.46609	0.0136598	0.041158	14.8346	20.2752	9.62178	25.0137	32.9072	52.6681	AT5G09995	NA	AT5G09995	NA
AT4G26400	82.6787	1.3036	0.438544	2.97257	0.00295317	0.0116288	45.9874	64.6272	65.9779	70.4932	133.823	231.541	AT4G26400	BTL05	AT4G26400	NA
AT4G22300	62.4559	1.30347	0.394128	3.30723	0.000942235	0.00443523	20.7685	15.2064	23.3672	45.4795	25.2289	74.5303	AT4G22300	TIPSY1	AT4G22300	encodes a carboxylesterase that inhibits AvrBsT-triggered phenotypes in Arabidopsis
AT3G23390	2661.18	1.30334	0.184146	7.07772	1.46545e-12	5.46966e-11	688.327	938.996	841.218	1730.5	1679.37	2684.08	AT3G23390	RPL36aA	AT3G23390	NA
AT2G26550	79.6314	1.30329	0.368427	3.53744	0.000404032	0.0021664	25.2189	13.9392	23.3672	36.3836	37.2949	78.5052	AT2G26550	HO2	AT2G26550	Encodes a heme oxygenase-like protein lacking the conserved histidine residue at the active site that is usually involved in heme-iron coordination. It is unable to bind and degrade heme. Mutant analyses suggest a role in photomorphogenesis. The protein can bind the heme precursor, proto IX, which could be biologically significant and point to a role in the regulation of the two tetrapyrrole bios…
AT4G27840	62.4699	1.30127	0.371349	3.50418	0.000458024	0.00240571	22.252	46.8864	38.4871	92.096	58.1361	116.267	AT4G27840	NA	AT4G27840	NA
AT4G26590	66.6678	1.30057	0.401359	3.24043	0.00119351	0.00543671	28.1858	7.6032	31.6144	62.5343	46.0701	55.6493	AT4G26590	ATOPT5, OPT5	AT4G26590	oligopeptide transporter
AT4G36520	457.267	1.29961	0.223786	5.80736	6.34656e-09	1.20458e-07	103.842	127.987	144.327	245.589	258.87	421.344	AT4G36520	AUXILIN-LIKE4	AT4G36520	NA
AT1G49660	627.775	1.29843	0.150119	8.64935	5.17944e-18	4.47463e-16	614.154	645.005	606.172	1474.67	1469.86	1643.64	AT1G49660	AtCXE5, CXE5	AT1G49660	Encodes a protein with carboxylesterase whose activity was tested using pNA.
AT2G40840	2481.6	1.29732	0.132902	9.76142	1.64838e-22	2.46556e-20	1148.2	1179.76	1169.73	2488.87	2492.18	3613.23	AT2G40840	DPE2	AT2G40840	Encodes a cytosolic protein with transglucosidase and amylomaltase activity. It is an essential component of the pathway from starch to sucrose and cellular metabolism in leaves at night. The protein binds to heteroglycans and utilizes glucose, mannose and xylose as acceptors. Fucose and galactose can also act as acceptors but less efficiently than the previous three. It was also was also recentl…
AT3G48360	48.5395	1.29602	0.318799	4.06533	4.7965e-05	0.000340426	68.2393	35.4816	59.1052	148.945	122.854	126.205	AT3G48360	ATBT2, BT2	AT3G48360	encodes a protein (BT2) that is an essential component of the TAC1-mediated telomerase activation pathway. Acts redundantly with BT3 and BT1 during female gametophyte development and with BT3 during male gametophyte development. BT2 also mediates multiple responses to nutrients, stresses, and hormones.
AT5G12150	419.732	1.29534	0.18167	7.13021	1.00217e-12	3.92071e-11	114.227	103.91	123.709	230.809	258.87	346.814	AT5G12150	PHGAP1	AT5G12150	Encodes a protein with similarity to REN1, a Rho GTPase activating protein.
AT5G42880	19.1834	1.29512	0.443412	2.92081	0.00349118	0.0133081	13.3512	24.0768	15.1199	53.4384	31.8103	44.7182	AT5G42880	NA	AT5G42880	NA
AT3G20820	1120.93	1.29306	0.13265	9.74785	1.88407e-22	2.77665e-20	531.08	601.92	646.034	1315.49	1338.23	1706.25	AT3G20820	NA	AT3G20820	NA
AT3G27190	449.383	1.29227	0.164662	7.84803	4.22637e-15	2.36513e-13	109.776	138.125	129.207	318.357	358.689	250.422	AT3G27190	UCK2, UKL2	AT3G27190	One of the homologous genes predicted to encode proteins with UPRT domains (Uracil phosphoribosyltransferase). Five of these genes (At5g40870, At3g27190, At1g55810, At4g26510 and At3g27440) show a high level of identity, and are annotated as also containing a N-terminal uracil kinase (UK) domain. These genes are referred to as UKL1 (UK-like 1), UKL2, UKL3, UKL4 and UKL5, respectively.
AT5G23920	95.1955	1.29189	0.286474	4.50963	6.49406e-06	5.88163e-05	34.1197	50.688	27.4908	105.74	73.4928	97.3862	AT5G23920	NA	AT5G23920	NA
AT3G15353	26.058	1.29151	0.523891	2.46523	0.0136926	0.0412257	20.7685	17.7408	8.24724	43.2055	25.2289	45.7119	AT3G15353	ATMT3, MT3	AT3G15353	metallothionein, binds to and detoxifies excess copper and other metals, limiting oxidative damage
AT5G19120	83.9152	1.29118	0.365137	3.53615	0.000406004	0.00217291	35.6031	40.5504	43.9853	69.3563	105.303	119.248	AT5G19120	NA	AT5G19120	NA
AT5G46790	62.5902	1.29057	0.463167	2.7864	0.00532975	0.0190282	8.90078	8.8704	4.12362	18.1918	16.4536	18.881	AT5G46790	PYL1, RCAR12	AT5G46790	Encodes a member of the PYR (pyrabactin resistance )/PYL(PYR1-like)/RCAR (regulatory components of ABA receptor) family proteins with 14 members. PYR/PYL/RCAR family proteins function as abscisic acid sensors. Mediate ABA-dependent regulation of protein phosphatase 2Cs ABI1 and ABI2.
AT2G46000	76.1765	1.29048	0.277881	4.64398	3.41756e-06	3.31549e-05	35.6031	34.2144	46.7344	83.0001	92.1403	109.311	AT2G46000	NA	AT2G46000	NA
AT3G12180	160.426	1.28804	0.249388	5.16479	2.40705e-07	3.10254e-06	35.6031	38.016	27.4908	93.233	60.3299	93.4113	AT3G12180	NA	AT3G12180	NA
AT3G56340	3418.75	1.28792	0.19087	6.7476	1.50306e-11	4.7219e-10	936.066	1087.26	1120.25	1827.14	2281.57	3566.52	AT3G56340	RPS26e	AT3G56340	NA
AT2G42320	96.2827	1.28786	0.306091	4.20743	2.5829e-05	0.000198425	60.822	81.1008	63.2288	139.85	133.823	227.566	AT2G42320	NA	AT2G42320	NA
AT1G78610	116.334	1.28723	0.327411	3.93153	8.44066e-05	0.000553768	54.8882	51.9552	43.9853	96.644	85.5588	184.835	AT1G78610	MSL6	AT1G78610	NA
AT4G16141	632.491	1.28703	0.450053	2.85973	0.00423996	0.0157024	87.5244	129.254	105.84	127.343	168.924	490.906	AT4G16141	AtGATA17L, GATA17L	AT4G16141	NA
AT4G34160	31.1875	1.28653	0.534031	2.40908	0.0159926	0.04676	13.3512	10.1376	6.8727	17.0548	16.4536	39.7495	AT4G34160	CYCD3, CYCD3;1	AT4G34160	encodes a cyclin D-type protein involved in the switch from cell proliferation to the final stages of differentiation. The gene is transcriptionally regulated by cytokinin and brassinosteroid. Protein interacts with cyclin-dependent kinase inhibitor ICK1.
AT1G79260	63.8289	1.28641	0.400817	3.20947	0.00132978	0.0059366	23.7354	26.6112	16.4945	34.1096	44.9732	83.4739	AT1G79260	NA	AT1G79260	NA
AT1G72790	91.2865	1.28352	0.393238	3.26397	0.00109864	0.00506322	34.1197	31.68	23.3672	53.4384	50.4578	112.292	AT1G72790	NA	AT1G72790	NA
AT2G44060	313.643	1.28287	0.255034	5.03018	4.90007e-07	5.90928e-06	183.949	236.967	215.803	480.946	530.904	538.605	AT2G44060	LEA26	AT2G44060	NA
AT4G00430	1086.69	1.28231	0.108778	11.7884	4.48181e-32	1.52252e-29	729.864	762.855	835.72	2042.03	2027.09	1597.93	AT4G00430	PIP1;4, PIP1E, TMP-C	AT4G00430	a member of the plasma membrane intrinsic protein subfamily PIP1.
AT1G05350	125.206	1.28003	0.307808	4.15855	3.20275e-05	0.000239883	48.9543	57.024	54.9816	80.7261	134.92	174.898	AT1G05350	NA	AT1G05350	NA
AT1G27400	3798.28	1.28	0.241083	5.30938	1.09998e-07	1.55809e-06	722.447	883.239	795.859	1245	1545.54	3040.84	AT1G27400	NA	AT1G27400	NA
AT4G28230	22.4149	1.27967	0.47665	2.68473	0.00725893	0.0246386	32.6362	20.2752	16.4945	46.6165	73.4928	47.6994	AT4G28230	NA	AT4G28230	NA
AT4G36250	646.576	1.27708	0.165372	7.72246	1.14109e-14	5.95594e-13	212.135	188.813	225.425	405.905	496.899	612.142	AT4G36250	ALDH3F1	AT4G36250	Encodes a putative aldehyde dehydrogenase. The gene is not responsive to osmotic stress and is expressed constitutively at a low level in plantlets and root cultures.
AT1G08650	751.893	1.27672	0.133606	9.55586	1.22558e-21	1.64862e-19	574.1	713.434	541.569	1567.91	1377.72	1490.61	AT1G08650	ATPPCK1, PPCK1	AT1G08650	Encodes a phosphoenolpyruvate carboxylase kinase that is expressed at highest levels in leaves. Expression is induced by light.
AT1G56210	72.336	1.27638	0.529381	2.41109	0.015905	0.0465311	11.8677	5.0688	32.989	18.1918	48.264	53.6618	AT1G56210	AtHMP10	AT1G56210	NA
AT2G14960	158.01	1.27636	0.259483	4.91887	8.70436e-07	9.84546e-06	56.3716	62.0928	76.9742	175.096	132.726	165.954	AT2G14960	GH3.1	AT2G14960	encodes a protein similar to IAA-amido synthases. Lines carrying an insertion in this gene are hypersensitive to auxin.
AT2G24290	140.294	1.27628	0.315102	4.05037	5.11372e-05	0.000360008	41.537	45.6192	41.2362	68.2193	77.8805	163.967	AT2G24290	NA	AT2G24290	NA
AT5G55370	298.116	1.27608	0.196836	6.48295	8.99468e-11	2.43293e-09	166.148	299.059	247.417	507.097	589.04	634.004	AT5G55370	AT2	AT5G55370	NA
AT4G27700	66.0564	1.27589	0.27909	4.57161	4.83998e-06	4.55649e-05	37.0866	32.9472	45.3598	88.6851	100.916	89.4363	AT4G27700	NA	AT4G27700	NA
AT3G45260	29.0072	1.27511	0.458482	2.78116	0.00541653	0.0192693	14.8346	6.336	9.62178	22.7398	35.1011	15.8998	AT3G45260	BIB	AT3G45260	NA
AT5G04560	434.124	1.27101	0.211284	6.01566	1.79154e-09	3.84865e-08	191.367	183.744	152.574	326.316	360.883	584.317	AT5G04560	DME, EMB1649	AT5G04560	Encodes a DNA glycosylase DEMETER (DME). Responsible for endosperm maternal-allele-specific hypomethylation at the MEDEA (MEA) gene. DME can excise 5-methylcytosine in vitro and when expressed in E. coli. DME establishes MEA imprinting by removing 5-methylcytosine to activate the maternal allele.
AT2G28150	79.9061	1.26842	0.389642	3.25536	0.00113249	0.00519653	31.1527	48.1536	31.6144	53.4384	65.8145	148.067	AT2G28150	SOK3	AT2G28150	NA
AT4G26930	64.0007	1.26837	0.33611	3.77368	0.000160859	0.00097405	32.6362	45.6192	53.6071	115.973	117.369	85.4614	AT4G26930	AtMYB97, MYB97	AT4G26930	Encodes a putative transcription factor (MYB97).
AT4G17560	586.338	1.26512	0.275908	4.58529	4.5336e-06	4.29834e-05	232.904	301.594	288.653	472.987	483.736	1021.56	AT4G17560	NA	AT4G17560	NA
AT4G30940	23.3317	1.26321	0.484601	2.6067	0.00914194	0.0296828	19.285	10.1376	16.4945	26.1507	37.2949	45.7119	AT4G30940	NA	AT4G30940	NA
AT5G27330	442.282	1.26257	0.266129	4.7442	2.09331e-06	2.1454e-05	37.0866	57.024	54.9816	92.096	91.0434	174.898	AT5G27330	NA	AT5G27330	NA
AT3G55800	158.027	1.26167	0.314374	4.01327	5.98835e-05	0.000412597	72.6897	57.024	65.9779	122.795	115.175	229.553	AT3G55800	SBPASE	AT3G55800	Encodes the chloroplast enzyme sedoheptulose-1,7-bisphosphatase (SBPase), involved in the carbon reduction of the Calvin cycle. Increase in SBPase activity in transgenic lines accumulate up to 50% more sucrose and starch than wild-type.
AT5G02490	671.903	1.26064	0.295049	4.27265	1.9316e-05	0.000153754	62.3055	114.048	75.5997	111.425	277.518	216.635	AT5G02490	AtHsp70-2, Hsp70-2	AT5G02490	NA
AT2G33630	186.045	1.25906	0.264303	4.76369	1.90084e-06	1.97402e-05	83.074	148.262	151.199	247.863	303.844	365.695	AT2G33630	NA	AT2G33630	NA
AT1G75580	160.64	1.25814	0.334435	3.762	0.000168559	0.00101181	50.4378	40.5504	53.6071	104.603	116.272	124.217	AT1G75580	SAUR51	AT1G75580	NA
AT5G19930	52.1488	1.25799	0.305871	4.11281	3.90867e-05	0.000285189	20.7685	24.0768	24.7417	54.5754	49.3609	62.6054	AT5G19930	PGR	AT5G19930	NA
AT2G37620	176.651	1.25769	0.284633	4.41863	9.93276e-06	8.56268e-05	54.8882	49.4208	67.3525	86.4111	120.66	201.729	AT2G37620	AAc1, ACT1	AT2G37620	Member of the actin gene family. Expressed in mature pollen.
AT3G47010	170.513	1.25762	0.180098	6.98298	2.88992e-12	1.03065e-10	86.0409	87.4368	101.716	196.699	244.611	216.635	AT3G47010	NA	AT3G47010	NA
AT4G03925	61.7924	1.25751	0.488589	2.57377	0.0100598	0.032132	13.3512	11.4048	9.62178	48.8905	20.8413	12.9186	AT4G03925	NA	AT4G03925	NA
AT2G35350	59.5584	1.25701	0.374265	3.3586	0.00078337	0.00382022	14.8346	26.6112	16.4945	28.4247	44.9732	65.5866	AT2G35350	PLL1	AT2G35350	Encodes a protein most similar to the POLTERGEIST locus. Double mutant analysis of loss of function alleles indicate PLL1 functions redundantly with POL to regulate meristem size and pedicel length. Acts in a dose dependent manner with POL to suppress the clv1, clv2 and clv3 phenotypes.
AT2G39920	126.379	1.25673	0.214541	5.85778	4.691e-09	9.16392e-08	111.26	103.91	71.4761	229.672	204.025	250.422	AT2G39920	NA	AT2G39920	NA
AT2G45850	248.322	1.25569	0.209678	5.98868	2.11555e-09	4.45867e-08	90.4913	167.27	147.076	259.233	317.006	393.52	AT2G45850	AHL9	AT2G45850	NA
AT1G07020	83.1942	1.25492	0.244819	5.12591	2.9611e-07	3.7468e-06	54.8882	60.8256	52.2325	114.836	134.92	151.048	AT1G07020	NA	AT1G07020	NA
AT5G07100	19.8604	1.25219	0.518181	2.4165	0.0156704	0.0459318	20.7685	31.68	15.1199	31.8357	54.8454	74.5303	AT5G07100	WRKY26	AT5G07100	Encodes WRKY DNA-binding protein 26 (WRKY26).
AT5G63470	43.7824	1.24852	0.474815	2.62949	0.00855136	0.0281437	7.41732	8.8704	9.62178	14.7808	19.7443	26.8309	AT5G63470	NF-YC4	AT5G63470	NA
AT1G64580	66.2417	1.24808	0.503465	2.47899	0.0131756	0.0399696	16.3181	15.2064	10.9963	11.3699	24.132	64.5929	AT1G64580	NA	AT1G64580	NA
AT3G17120	87.354	1.24722	0.317583	3.92724	8.59269e-05	0.000561903	25.2189	30.4128	15.1199	37.5206	68.0083	62.6054	AT3G17120	NA	AT3G17120	NA
AT3G05590	11711.7	1.24373	0.16436	7.56714	3.81524e-14	1.82707e-12	4478.58	5280.43	4658.32	9397.2	9471.8	15272.7	AT3G05590	RPL18	AT3G05590	Encodes cytoplasmic ribosomal protein L18.
AT5G47230	71.5346	1.24352	0.432962	2.87213	0.0040772	0.0151923	63.7889	82.368	68.727	109.151	293.971	106.33	AT5G47230	ATERF-5, ATERF5, AtMACD1, ERF102, ERF5	AT5G47230	encodes a member of the ERF (ethylene response factor) subfamily B-3 of ERF/AP2 transcription factor family (ATERF-5). The protein contains one AP2 domain. There are 18 members in this subfamily including ATERF-1, ATERF-2, AND ATERF-5.
AT3G44630	78.0272	1.24327	0.292196	4.25493	2.09114e-05	0.000165401	38.5701	55.7568	54.9816	134.165	119.563	101.361	AT3G44630	NA	AT3G44630	NA
AT1G76670	573.921	1.24157	0.128101	9.69209	3.25806e-22	4.6313e-20	320.428	305.395	302.399	653.768	757.964	781.077	AT1G76670	URGT1	AT1G76670	NA
AT4G01270	74.9244	1.23884	0.300018	4.12922	3.6399e-05	0.000268499	25.2189	45.6192	50.858	105.74	102.012	81.4864	AT4G01270	NA	AT4G01270	NA
AT5G18920	150.024	1.23714	0.248094	4.98656	6.14653e-07	7.23651e-06	45.9874	72.2304	43.9853	147.808	98.7217	138.129	AT5G18920	NA	AT5G18920	NA
AT3G25010	117.379	1.23668	0.248237	4.98186	6.29762e-07	7.39012e-06	37.0866	34.2144	34.3635	69.3563	80.0743	98.38	AT3G25010	AtRLP41, RLP41	AT3G25010	NA
AT5G66610	37.7672	1.23292	0.395328	3.11873	0.0018163	0.00770785	37.0866	12.672	16.4945	57.9864	59.233	36.7683	AT5G66610	DAR7	AT5G66610	NA
AT5G58770	69.2022	1.22995	0.269687	4.56064	5.09977e-06	4.77416e-05	75.6566	65.8944	82.4724	210.343	170.021	145.086	AT5G58770	AtcPT4, AtCPT7, cPT4, CPT7	AT5G58770	NA
AT1G33055	247.7	1.22852	0.213767	5.74701	9.08366e-09	1.67031e-07	152.797	87.4368	107.214	277.425	218.285	314.021	AT1G33055	NA	AT1G33055	NA
AT4G26710	290.83	1.22756	0.181111	6.77791	1.21927e-11	3.89758e-10	189.883	136.858	199.308	352.466	376.239	498.856	AT4G26710	NA	AT4G26710	NA
AT2G19740	1126.35	1.22527	0.227041	5.3967	6.78788e-08	1.00927e-06	221.036	340.877	358.755	540.069	587.943	1025.54	AT2G19740	NA	AT2G19740	NA
AT1G77480	1300.52	1.225	0.116344	10.5291	6.34188e-26	1.29704e-23	409.436	456.192	434.355	1090.37	959.795	991.75	AT1G77480	NA	AT1G77480	NA
AT1G72130	61.427	1.22474	0.490702	2.4959	0.0125639	0.0384632	5.93385	8.8704	5.49816	6.82193	18.6474	21.8622	AT1G72130	NPF5.11	AT1G72130	NA
AT5G44370	61.8972	1.22413	0.368896	3.31837	0.000905459	0.00429681	11.8677	13.9392	17.869	23.8767	35.1011	42.7307	AT5G44370	PHT4;6	AT5G44370	Encodes an inorganic phosphate transporter (PHT4;6).
AT4G39090	1333.56	1.22405	0.166678	7.34384	2.07558e-13	8.8669e-12	305.593	429.581	324.391	719.713	752.479	1005.66	AT4G39090	RD19, RD19A	AT4G39090	Similar to cysteine proteinases, induced by desiccation but not abscisic acid. Required for RRS1-R mediated resistance against Ralstonia solanacearum. Interacts with the R. solanacearum type III effector PopP2. RD19 associates with PopP2 to form a nuclear complex that is required for activation of the RRS1-Rmediated resistance response.
AT2G24600	62.361	1.22199	0.505618	2.41683	0.0156565	0.0459044	31.1527	96.3072	65.9779	69.3563	270.936	112.292	AT2G24600	NA	AT2G24600	NA
AT3G20840	90.1872	1.2215	0.336951	3.62514	0.000288807	0.0016232	20.7685	15.2064	23.3672	53.4384	42.7794	41.737	AT3G20840	AtPLT1, PLT1	AT3G20840	Encodes a member of the AINTEGUMENTA-like (AIL) subclass of the AP2/EREBP family of transcription factors and is essential for quiescent center (QC) specification and stem cell activity. It is a key effector for establishment of the stem cell niche during embryonic pattern formation. It is transcribed in response to auxin accumulation and is dependent on auxin response transcription factors.
AT3G30300	800	1.22136	0.166913	7.31734	2.52938e-13	1.06505e-11	124.611	144.461	162.196	270.603	331.266	403.457	AT3G30300	NA	AT3G30300	NA
AT2G22795	272.371	1.22096	0.21936	5.56601	2.60644e-08	4.31579e-07	123.127	86.1696	101.716	180.781	269.839	271.29	AT2G22795	NA	AT2G22795	NA
AT2G26250	1811.53	1.22087	0.272517	4.47996	7.4656e-06	6.62093e-05	176.532	261.043	266.661	316.083	496.899	828.777	AT2G26250	FDH, KCS10	AT2G26250	epidermis-specific, encodes KCS10, a putative 3-ketoacyl-CoA synthase. probably involved in the synthesis of long-chain lipids found in the cuticle.
AT5G42490	31.5349	1.21929	0.316105	3.85723	0.000114678	0.000722566	31.1527	36.7488	26.1163	79.5892	73.4928	66.5804	AT5G42490	NA	AT5G42490	NA
AT5G53420	1386.8	1.2177	0.137448	8.85939	8.04513e-19	7.86578e-17	700.195	733.709	794.484	1970.4	1842.81	1372.35	AT5G53420	CCT101	AT5G53420	NA
AT1G56080	44.6889	1.21708	0.367781	3.30924	0.000935495	0.00441135	23.7354	13.9392	34.3635	62.5343	64.7176	39.7495	AT1G56080	NAIP3	AT1G56080	NA
AT2G41890	57.7941	1.21511	0.411782	2.95085	0.00316902	0.0122951	13.3512	8.8704	21.9926	35.2466	19.7443	46.7056	AT2G41890	NA	AT2G41890	NA
AT2G07050	955.08	1.21352	0.111679	10.8661	1.67215e-27	3.89708e-25	333.779	318.067	357.38	694.7	767.836	874.489	AT2G07050	CAS1	AT2G07050	Involved in the biosynthesis of brassinosteroids. Catalyzes the reaction from epoxysqualene to cycloartenol.
AT5G55450	19.375	1.21296	0.463287	2.61817	0.00884027	0.0288811	16.3181	12.672	26.1163	52.3014	40.5856	34.7808	AT5G55450	AtLTP4.4	AT5G55450	NA
AT4G39570	59.9469	1.21287	0.363585	3.33587	0.000850325	0.00408314	17.8016	24.0768	21.9926	31.8357	52.6516	63.5992	AT4G39570	NA	AT4G39570	NA
AT2G40815	85.6487	1.21132	0.316942	3.82189	0.00013243	0.000819988	62.3055	39.2832	39.8617	80.7261	83.365	160.985	AT2G40815	NA	AT2G40815	NA
AT1G70100	82.0888	1.20863	0.305152	3.96075	7.47159e-05	0.000499011	50.4378	26.6112	54.9816	68.2193	117.369	117.261	AT1G70100	NA	AT1G70100	NA
AT2G39450	93.1932	1.20744	0.301206	4.0087	6.10529e-05	0.000418847	16.3181	20.2752	39.8617	57.9864	60.3299	58.6305	AT2G39450	ATMTP11, MTP11	AT2G39450	Encodes a Golgi-localized manganese transporter that is involved in Mn tolerance. When expressed into yeast cells, this gene confer Mn<sup>2+</sup> and Cu<sup>2+</sup> tolerance.
AT4G28800	244.25	1.20715	0.394899	3.05686	0.00223665	0.00918632	16.3181	8.8704	12.3709	44.3425	27.4227	14.9061	AT4G28800	NA	AT4G28800	NA
AT4G34240	141.757	1.20715	0.298721	4.04106	5.32107e-05	0.000372512	44.5039	29.1456	49.4834	70.4932	84.4619	127.198	AT4G34240	ALDH3, ALDH3I1	AT4G34240	Aldehyde dehydrogenase induced by ABA and dehydration
AT5G44650	576.572	1.20607	0.235077	5.13052	2.88935e-07	3.67225e-06	179.499	178.675	211.679	338.822	332.363	641.954	AT5G44650	AtCEST, CEST, Y3IP1	AT5G44650	Encodes a chloroplast protein that induces tolerance to multiple environmental stresses and reduces photooxidative damage.
AT4G03505	20.9458	1.20607	0.504119	2.39243	0.0167373	0.0485382	13.3512	36.7488	23.3672	55.7124	48.264	66.5804	AT4G03505	NA	AT4G03505	NA
AT2G16440	152.323	1.20416	0.350905	3.43158	0.000600077	0.0030503	32.6362	60.8256	46.7344	97.781	81.1712	145.086	AT2G16440	MCM4	AT2G16440	NA
AT2G47230	138.535	1.20358	0.36362	3.30998	0.000933027	0.00440223	11.8677	13.9392	37.1126	40.9316	31.8103	71.5491	AT2G47230	ATDUF6, DUF6	AT2G47230	Member of the plant-specific DUF724 protein family. Arabidopsis has 10 DUF724 proteins.
AT5G27240	113.507	1.20347	0.306002	3.93287	8.39365e-05	0.000551225	19.285	34.2144	52.2325	59.1234	86.6557	98.38	AT5G27240	NA	AT5G27240	NA
AT5G20950	4015.61	1.2031	0.378624	3.17756	0.0014852	0.00651945	725.414	1932.48	1498.25	1937.43	3053.79	4579.14	AT5G20950	BGLC1	AT5G20950	NA
AT5G43860	31.0499	1.20203	0.422624	2.84421	0.00445216	0.0163404	28.1858	13.9392	27.4908	75.0412	41.6825	42.7307	AT5G43860	ATCLH2, CLH2	AT5G43860	Encodes a chlorophyllase, the first enzyme in chlorophyll degradation. It catalyzes the hydrolysis of the ester bond to chlorophyllide and phytol. AtCLH2 has a typical signal sequence for the chloroplast. Gene expression does not respond to methyljasmonate, a known promoter of senescence and chlorophyll degradation.
AT2G28250	54.3438	1.20158	0.261524	4.59454	4.33705e-06	4.13743e-05	37.0866	44.352	39.8617	92.096	107.497	80.4927	AT2G28250	NCRK	AT2G28250	NA
AT3G55420	150.744	1.20108	0.335056	3.58472	0.000337435	0.00184938	16.3181	17.7408	12.3709	36.3836	28.5196	41.737	AT3G55420	NA	AT3G55420	NA
AT3G61100	167.189	1.20052	0.299871	4.00345	6.24256e-05	0.000427175	34.1197	48.1536	57.7307	65.9453	97.6248	158.004	AT3G61100	NA	AT3G61100	NA
AT5G66440	233.372	1.2004	0.235179	5.10417	3.32246e-07	4.15362e-06	293.726	153.331	189.687	568.494	532	359.733	AT5G66440	NA	AT5G66440	NA
AT2G32520	344.371	1.19938	0.143693	8.34685	7.01055e-17	5.03629e-15	172.082	235.699	182.814	463.891	414.631	481.962	AT2G32520	NA	AT2G32520	NA
AT3G04760	258.769	1.19813	0.317872	3.76923	0.000163749	0.000988563	83.074	74.7648	72.8506	126.206	106.4	295.14	AT3G04760	NA	AT3G04760	NA
AT1G14820	40.8399	1.19789	0.425598	2.81459	0.0048839	0.0176629	14.8346	15.2064	17.869	21.6028	49.3609	38.7557	AT1G14820	NA	AT1G14820	NA
AT3G06650	578.851	1.19661	0.158511	7.54907	4.38378e-14	2.07226e-12	200.268	278.784	290.028	509.371	638.401	618.104	AT3G06650	ACLB-1	AT3G06650	One of the two genes encoding subunit B of the trimeric enzyme ATP Citrate lyase
AT1G05470	40.6031	1.19557	0.450853	2.6518	0.00800637	0.0266786	20.7685	6.336	20.6181	31.8357	23.0351	52.6681	AT1G05470	CVP2	AT1G05470	Encodes an inositol polyphosphate 5' phosphatase (5PTase) that is required for the proper recruitment of cells into developing vascular tissue in leaves and cotyledons. It is most similar to Type I 5PTases that are known to cleave a phosphate from IP3 or IP4. cvp2 mutants have elevated levels of IP3 and are hypersensitive to ABA in seed germination assays.
AT1G01060	191.551	1.19554	0.247137	4.83755	1.31449e-06	1.41342e-05	43.0204	32.9472	35.738	70.4932	94.3341	89.4363	AT1G01060	LHY, LHY1	AT1G01060	LHY encodes a myb-related putative transcription factor involved in circadian rhythm along with another myb transcription factor CCA1
AT5G57090	420.443	1.19308	0.251484	4.74416	2.0937e-06	2.1454e-05	90.4913	130.522	72.8506	163.726	214.994	294.146	AT5G57090	AGR, AGR1, ATPIN2, EIR1, MM31, PIN2, WAV6	AT5G57090	Encodes an auxin efflux carrier that is similar to bacterial membrane transporters. Root-specific role in the transport of auxin. Acts downstream of CTR1 and ethylene biosynthesis, in the same pathway as EIN2 and AUX1, and independent from EIN3 and EIN5/AIN1 pathway. In the root, the protein localizes apically in epidermal and lateral root cap cells and predominantly basally in cortical cells. Fu…
AT2G34650	107.311	1.19172	0.259924	4.58488	4.54252e-06	4.30476e-05	90.4913	63.36	71.4761	164.863	209.509	139.123	AT2G34650	ABR, PID	AT2G34650	Encodes a protein serine/threonine kinase that may act as a positive regulator of cellular auxin efflux, as a a binary switch for PIN polarity, and as a negative regulator of auxin signaling. Recessive mutants exhibit similar phenotypes as pin-formed mutants in flowers and inflorescence but distinct phenotypes in cotyledons and leaves. Expressed in the vascular tissue proximal to root and shoot m…
AT2G45470	602.08	1.19135	0.215463	5.52925	3.21598e-08	5.18567e-07	277.408	372.557	284.53	562.809	601.106	970.881	AT2G45470	AGP8, FLA8	AT2G45470	NA
AT2G30250	45.9497	1.19118	0.342372	3.4792	0.000502905	0.00260997	43.0204	35.4816	42.6107	80.7261	125.048	70.5553	AT2G30250	ATWRKY25, WRKY25	AT2G30250	member of WRKY Transcription Factor; Group I. Located in nucleus. Involved in response to various abiotic stresses - especially salt stress.
AT4G20140	162.885	1.19107	0.199654	5.96568	2.43623e-09	5.06003e-08	54.8882	49.4208	61.8543	125.069	111.885	141.111	AT4G20140	GSO1, SGN3	AT4G20140	Encodes GASSHO1 (GSO1), a putative leucine-rich repeat transmembrane-type receptor kinase. GSO1 and a homolog GSO2 (At5g44700) are required for the formation of a normal epidermal surface during embryogenesis.
AT3G12145	60.544	1.19034	0.419132	2.84	0.00451134	0.0165216	11.8677	25.344	15.1199	32.9726	28.5196	58.6305	AT3G12145	FLR1, FTM4	AT3G12145	A novel leucine-rich repeat protein. Interacts directly with MADS domain transcription factor.
AT4G00630	519.526	1.18922	0.143723	8.27436	1.29148e-16	8.80445e-15	182.466	177.408	184.188	388.85	358.689	490.906	AT4G00630	ATKEA2, KEA2	AT4G00630	member of Putative potassium transporter family
AT3G49590	158.254	1.1891	0.187344	6.34715	2.19339e-10	5.51596e-09	74.1732	88.704	85.2215	209.206	204.025	155.023	AT3G49590	ATG13	AT3G49590	NA
AT5G08590	753.951	1.18848	0.128631	9.23952	2.47604e-20	2.8853e-18	219.553	292.723	294.152	567.357	605.493	668.785	AT5G08590	ASK2, SNRK2-1, SNRK2.1, SRK2G	AT5G08590	Encodes a member of SNF1-related protein kinases (SnRK2) whose activity is activated by ionic (salt) and non-ionic (mannitol) osmotic stress. Similar to the calcium/calmodulin-dependent protein kinase subfamily and the SNF1 kinase subfamily.
AT1G15910	123.804	1.18632	0.280598	4.22781	2.35973e-05	0.000183483	45.9874	45.6192	70.1015	106.877	93.2372	166.948	AT1G15910	FDM1, IDNL1, IDP1	AT1G15910	NA
AT2G05220	2898.9	1.18619	0.156874	7.56142	3.98706e-14	1.89366e-12	838.157	864.231	934.687	1504.23	1910.81	2583.72	AT2G05220	NA	AT2G05220	NA
AT4G18760	51.6077	1.18434	0.443713	2.66917	0.00760399	0.0255802	11.8677	19.008	21.9926	18.1918	36.198	65.5866	AT4G18760	AtRLP51, RLP51, SNC2	AT4G18760	NA
AT1G20950	446.597	1.18413	0.216288	5.4748	4.38013e-08	6.85866e-07	167.631	228.096	166.319	372.932	347.72	557.486	AT1G20950	NA	AT1G20950	NA
AT5G35630	45.9693	1.17818	0.459092	2.56634	0.0102779	0.0326672	34.1197	22.8096	35.738	71.6302	31.8103	105.336	AT5G35630	ATGSL1, GLN2, GS2	AT5G35630	chloroplastic glutamine synthetase
AT4G33010	765.759	1.17807	0.161652	7.28769	3.15309e-13	1.30036e-11	425.754	515.751	482.464	895.946	1098.01	1229.25	AT4G33010	AtGLDP1, GLDP1	AT4G33010	NA
AT3G55770	718.095	1.17785	0.152419	7.72771	1.09494e-14	5.77524e-13	323.395	501.811	415.111	868.659	893.98	1048.39	AT3G55770	WLIM2b	AT3G55770	NA
AT3G20898	72.8601	1.1759	0.330837	3.55431	0.000378973	0.00204848	25.2189	70.9632	30.2399	103.466	87.7527	97.3862	AT3G20898	NA	AT3G20898	NA
AT3G63040	806.005	1.17438	0.207613	5.65656	1.54434e-08	2.67299e-07	1222.37	651.341	871.458	2309.22	2121.42	1760.9	AT3G63040	NA	AT3G63040	NA
AT1G12845	38.6196	1.17416	0.327035	3.59031	0.00033029	0.00181519	28.1858	36.7488	30.2399	63.6713	68.0083	83.4739	AT1G12845	NA	AT1G12845	NA
AT3G52490	221.047	1.17408	0.163925	7.16231	7.93293e-13	3.15476e-11	133.512	158.4	127.832	322.905	321.394	305.077	AT3G52490	SMXL3	AT3G52490	NA
AT2G47730	410.678	1.17311	0.220412	5.32236	1.02431e-07	1.46018e-06	188.4	183.744	225.425	386.576	491.415	469.044	AT2G47730	ATGSTF5, ATGSTF8, GST6, GSTF8	AT2G47730	Encodes glutathione transferase belonging to the phi class of GSTs. Naming convention according to Wagner et al. (2002).
AT2G07690	131.621	1.17298	0.434341	2.70061	0.00692133	0.0236493	13.3512	40.5504	24.7417	39.7946	47.1671	91.4238	AT2G07690	MCM5	AT2G07690	Member of the minichromosome maintenance complex, involved in DNA replication initiation. Abundant in proliferating and endocycling tissues. Localized in the nucleus during G1, S and G2 phases of the cell cycle, and are released into the cytoplasmic compartment during mitosis. Binds chromatin.
AT3G13640	109.955	1.17167	0.318896	3.67414	0.000238656	0.00137572	14.8346	16.4736	35.738	42.0686	42.7794	65.5866	AT3G13640	ABCE1, ATRLI1, RLI1	AT3G13640	member of RLI subfamily
AT5G44700	907.356	1.17101	0.255354	4.58582	4.52215e-06	4.28951e-05	134.995	168.538	147.076	192.151	319.2	502.831	AT5G44700	EDA23, GSO2	AT5G44700	Encodes GASSHO2 (GSO2), a putative leucine-rich repeat transmembrane-type receptor kinase. GSO2 and a homolog GSO1 (At4g20140) are required for the formation of a normal epidermal surface during embryogenesis.
AT3G58200	412.542	1.17035	0.268223	4.36335	1.28088e-05	0.000107372	471.741	277.517	339.511	1166.55	712.99	569.411	AT3G58200	NA	AT3G58200	NA
AT3G52290	94.9157	1.17033	0.267236	4.37937	1.19022e-05	0.000100572	47.4708	57.024	53.6071	98.9179	125.048	132.167	AT3G52290	IQD3	AT3G52290	NA
AT3G05130	217.252	1.16909	0.350387	3.33658	0.000848158	0.00407939	32.6362	36.7488	49.4834	48.8905	73.4928	144.092	AT3G05130	NA	AT3G05130	NA
AT1G16920	218.386	1.16885	0.269608	4.33538	1.45511e-05	0.000120197	115.71	152.064	114.087	208.069	228.157	422.338	AT1G16920	ATRABA1B, BEX5, RAB11, RABA1b	AT1G16920	small GTP-binding protein (Rab11)similar to YPT3/RAB11 proteins in yeast and mammals, respectively. YPT3/RAB11 is involved in intracellular protein trafficking.
AT5G19760	2346.14	1.1688	0.170408	6.85885	6.94187e-12	2.33449e-10	703.162	917.453	776.615	1523.56	1473.15	2393.91	AT5G19760	NA	AT5G19760	NA
AT2G44160	169.967	1.1677	0.33163	3.5211	0.000429755	0.00228175	59.3385	103.91	122.334	154.63	186.474	301.102	AT2G44160	MTHFR2	AT2G44160	methylenetetrahydrofolate reductase MTHFR2 mRNA, complete
AT3G24450	17.8725	1.1672	0.448283	2.60371	0.00922197	0.0299039	13.3512	17.7408	23.3672	39.7946	47.1671	35.7745	AT3G24450	AtHMP27	AT3G24450	NA
AT1G17480	31.3869	1.16542	0.361077	3.22761	0.00124828	0.00563751	40.0535	32.9472	32.989	62.5343	78.9774	95.3988	AT1G17480	IQD7	AT1G17480	NA
AT3G09780	152.501	1.16482	0.267563	4.35344	1.34019e-05	0.0001117	14.8346	30.4128	31.6144	71.6302	54.8454	48.6931	AT3G09780	ATCRR1, CCR1	AT3G09780	NA
AT2G35130	144.543	1.16403	0.321251	3.62343	0.000290724	0.00163129	60.822	62.0928	81.0979	92.096	130.532	233.528	AT2G35130	AtPPR66L, PPR_66	AT2G35130	NA
AT4G35730	57.8494	1.16298	0.301243	3.8606	0.000113111	0.000714265	54.8882	32.9472	24.7417	75.0412	99.8186	75.524	AT4G35730	ISTL3	AT4G35730	NA
AT1G74970	722.247	1.16282	0.225936	5.14666	2.65166e-07	3.40033e-06	382.734	370.023	382.122	641.261	652.66	1245.15	AT1G74970	PRPS9, RPS9, SOT8, TWN3	AT1G74970	ribosomal protein S9, nuclear encoded component of the chloroplast ribosome
AT3G10940	127.572	1.16097	0.256708	4.52253	6.11057e-06	5.59243e-05	41.537	67.1616	41.2362	102.329	107.497	127.198	AT3G10940	LSF2	AT3G10940	NA
AT2G44670	192.712	1.15844	0.270166	4.28786	1.80401e-05	0.000144631	74.1732	58.2912	67.3525	156.904	86.6557	200.735	AT2G44670	NA	AT2G44670	NA
AT3G11720	98.6659	1.15807	0.21043	5.50336	3.72615e-08	5.91784e-07	63.7889	76.032	54.9816	143.26	140.404	152.042	AT3G11720	NA	AT3G11720	NA
AT4G39970	31.4293	1.15535	0.470872	2.45364	0.0141418	0.0423367	34.1197	21.5424	10.9963	63.6713	39.4887	44.7182	AT4G39970	NA	AT4G39970	NA
AT5G58960	161.136	1.15404	0.27665	4.17148	3.02633e-05	0.000228033	51.9212	89.9712	63.2288	118.247	120.66	218.622	AT5G58960	GIL1	AT5G58960	Mutant plants display impaired light-regulation of the hypocotyl randomization response.
AT1G51170	369.129	1.15324	0.151421	7.61612	2.61405e-14	1.28731e-12	183.949	240.768	262.537	484.357	549.551	497.862	AT1G51170	AGC2-3, UCN	AT1G51170	NA
AT4G29360	153.778	1.15324	0.195549	5.89744	3.69191e-09	7.4071e-08	87.5244	93.7728	64.6034	197.836	155.761	193.779	AT4G29360	NA	AT4G29360	NA
AT3G15980	399.043	1.15275	0.286024	4.03026	5.57159e-05	0.000388287	192.85	188.813	147.076	239.904	363.077	571.399	AT3G15980	NA	AT3G15980	NA
AT2G39470	47.7734	1.15199	0.468924	2.45667	0.0140231	0.0420316	34.1197	73.4976	46.7344	102.329	118.466	123.223	AT2G39470	PnsL1, PPL2	AT2G39470	NA
AT2G24230	42.2416	1.1508	0.473166	2.43213	0.0150103	0.0443929	7.41732	6.336	10.9963	17.0548	21.9382	15.8998	AT2G24230	NA	AT2G24230	NA
AT5G16130	5847.76	1.15064	0.168822	6.81571	9.38006e-12	3.09413e-10	1820.21	2261.95	2180.02	3671.33	3986.16	6245.64	AT5G16130	NA	AT5G16130	NA
AT3G25700	288.931	1.15061	0.307063	3.74715	0.000178857	0.00106533	68.2393	70.9632	90.7196	129.617	107.497	272.284	AT3G25700	NA	AT3G25700	NA
AT1G03200	131.121	1.14834	0.241824	4.74866	2.04765e-06	2.10467e-05	94.9417	111.514	112.712	309.261	228.157	171.917	AT1G03200	NA	AT1G03200	NA
AT2G02130	219.399	1.14691	0.265958	4.31236	1.61522e-05	0.000131216	176.532	190.08	144.327	412.727	311.522	407.432	AT2G02130	LCR68, PDF2.3	AT2G02130	Predicted to encode a PR (pathogenesis-related) protein. Belongs to the plant defensin (PDF) family with the following members: At1g75830/PDF1.1, At5g44420/PDF1.2a, At2g26020/PDF1.2b, At5g44430/PDF1.2c, At2g26010/PDF1.3, At1g19610/PDF1.4, At1g55010/PDF1.5, At2g02120/PDF2.1, At2g02100/PDF2.2, At2g02130/PDF2.3, At1g61070/PDF2.4, At5g63660/PDF2.5, At2g02140/PDF2.6, At5g38330/PDF3.1 and At4g30070/PDF…
AT1G12230	306.154	1.14537	0.153602	7.45672	8.87056e-14	3.96767e-12	188.4	249.639	240.544	496.864	444.248	562.455	AT1G12230	NA	AT1G12230	NA
AT1G33700	217.157	1.14501	0.235489	4.86225	1.16057e-06	1.26626e-05	149.83	154.598	178.69	409.316	393.79	266.322	AT1G33700	NA	AT1G33700	NA
AT4G29260	149.887	1.14448	0.273137	4.19014	2.78781e-05	0.000212134	31.1527	39.2832	46.7344	62.5343	76.7836	119.248	AT4G29260	VSP3	AT4G29260	NA
AT1G62770	79.1608	1.14361	0.259664	4.40419	1.06179e-05	9.12581e-05	63.7889	81.1008	63.2288	148.945	131.629	179.866	AT1G62770	PMEI9	AT1G62770	NA
AT4G17880	218.721	1.14045	0.20206	5.6441	1.66048e-08	2.86164e-07	90.4913	88.704	57.7307	146.671	166.73	207.691	AT4G17880	MYC4	AT4G17880	NA
AT3G22600	51.5223	1.13828	0.407204	2.79535	0.00518438	0.018572	38.5701	68.4288	57.7307	71.6302	199.637	92.4175	AT3G22600	LTPG5	AT3G22600	NA
AT2G16400	61.6894	1.13799	0.404311	2.81465	0.00488309	0.0176629	19.285	10.1376	12.3709	32.9726	23.0351	34.7808	AT2G16400	BLH7	AT2G16400	NA
AT2G28310	292.866	1.13739	0.21352	5.32684	9.99371e-08	1.42972e-06	105.326	98.8416	83.8469	170.548	179.893	281.228	AT2G28310	NA	AT2G28310	NA
AT5G24470	272.126	1.13426	0.226198	5.01445	5.31849e-07	6.35271e-06	192.85	299.059	274.908	453.658	549.551	681.704	AT5G24470	APRR5, PRR5	AT5G24470	Encodes a pseudo-response regulator whose mutation affects various circadian-associated biological events such as flowering time in the long-day photoperiod conditions, red light sensitivity of seedlings during early photomorphogenesis, and the period of free-running rhythms of certain clock-controlled genes including CCA1 and APRR1/TOC1 in constant white light. Acts as transcriptional repressor …
AT1G49050	41.1763	1.13307	0.338589	3.34645	0.000818546	0.00396092	25.2189	41.8176	16.4945	54.5754	59.233	70.5553	AT1G49050	APCB1	AT1G49050	NA
AT2G47590	1409.11	1.13289	0.151238	7.49078	6.84638e-14	3.14009e-12	548.882	610.791	569.06	1069.91	1093.62	1626.75	AT2G47590	PHR2	AT2G47590	photolyase/blue light photoreceptor PHR2 (PHR2) mRNA,
AT3G26980	534.661	1.13267	0.106643	10.6212	2.37461e-26	5.11768e-24	390.151	487.872	397.242	982.358	932.372	888.401	AT3G26980	MUB4	AT3G26980	NA
AT4G15802	355.773	1.13243	0.196046	5.77636	7.63353e-09	1.43223e-07	145.379	169.805	162.196	338.822	254.483	453.144	AT4G15802	AtHSBP, HSBP	AT4G15802	Encodes a protein with similarity to heat shock factor binding proteins. Involved in negative regulation of heat shock response. Becomes nuclear localized upon heat treatment.
AT5G05740	286.263	1.13196	0.340291	3.32645	0.000879604	0.00419733	102.359	103.91	89.3451	109.151	179.893	357.745	AT5G05740	ATEGY2, EGY2	AT5G05740	S2P-like putative metalloprotease, also contain transmembrane helices near their C-termini and many of them, five of seven, contain a conserved zinc-binding motif HEXXH. Homolog of EGY1. Each of the EGY1 and EGY-like proteins share two additional highly conserved motifs, the previously reported NPDG motif (aa 442454 in EGY1, Rudner et al., 1999) and a newly defined GNLR motif (aa 171179 in EGY1).…
AT5G22440	2517.01	1.13095	0.199553	5.66742	1.44965e-08	2.52875e-07	565.2	618.394	641.91	1129.03	959.795	1907.98	AT5G22440	NA	AT5G22440	NA
AT5G14320	1056.88	1.12978	0.181841	6.21298	5.19897e-10	1.21166e-08	577.067	552.499	611.67	1140.4	978.442	1689.35	AT5G14320	EMB3137	AT5G14320	NA
AT2G35520	102.254	1.12655	0.320752	3.5122	0.000444408	0.00234958	43.0204	34.2144	52.2325	65.9453	93.2372	122.23	AT2G35520	DAD2	AT2G35520	NA
AT1G52220	42.4183	1.12599	0.471159	2.38983	0.0168563	0.0488293	8.90078	17.7408	17.869	20.4658	24.132	52.6681	AT1G52220	CURT1C	AT1G52220	NA
AT5G58480	75.3471	1.12473	0.429913	2.61619	0.0088917	0.0290019	32.6362	17.7408	15.1199	22.7398	42.7794	75.524	AT5G58480	NA	AT5G58480	NA
AT5G24800	37.984	1.12338	0.374644	2.99851	0.00271299	0.0108454	40.0535	44.352	43.9853	76.1782	92.1403	111.299	AT5G24800	ATBZIP9, BZIP9, BZO2H2	AT5G24800	Encodes bZIP protein BZO2H2.
AT3G54750	55.6396	1.12207	0.413619	2.71282	0.00667136	0.0229119	32.6362	40.5504	19.2436	75.0412	57.0392	69.5616	AT3G54750	NA	AT3G54750	NA
AT1G79500	151.894	1.12073	0.278591	4.02285	5.7498e-05	0.000398765	87.5244	59.5584	71.4761	121.658	130.532	220.61	AT1G79500	AtkdsA1, KDO8PS	AT1G79500	Encodes a protein with 3-deoxy-8-phosphooctulonate synthase (KDOP synthase) activity which is involved in the biosynthesis of KDO, a component of cell wall rhamnogalacturonan II.
AT4G39540	173.937	1.12055	0.249357	4.49377	6.99742e-06	6.25554e-05	56.3716	43.0848	52.2325	73.9042	105.303	148.067	AT4G39540	ATSK2, SK2	AT4G39540	NA
AT2G29660	102.415	1.12032	0.219195	5.11107	3.20334e-07	4.01781e-06	54.8882	49.4208	46.7344	101.192	114.078	112.292	AT2G29660	NA	AT2G29660	NA
AT2G29940	117.059	1.11969	0.398932	2.80671	0.00500502	0.0180044	166.148	107.712	142.952	403.631	315.91	185.829	AT2G29940	ABCG31, ATPDR3, PDR3	AT2G29940	NA
AT2G33100	58.9523	1.11922	0.273692	4.08934	4.32599e-05	0.000311892	51.9212	77.2992	85.2215	143.26	155.761	167.942	AT2G33100	ATCSLD1, CSLD1	AT2G33100	encodes a gene similar to cellulose synthase
AT1G34630	627.769	1.11875	0.162825	6.87087	6.38131e-12	2.17149e-10	585.968	653.876	589.678	1611.11	1284.48	1080.19	AT1G34630	NA	AT1G34630	NA
AT3G21190	138.256	1.11869	0.216082	5.17715	2.25298e-07	2.93415e-06	37.0866	54.4896	46.7344	94.37	108.594	99.3737	AT3G21190	AtMSR1, MSR1	AT3G21190	NA
AT3G60245	7319.56	1.11796	0.222509	5.02432	5.05209e-07	6.06341e-06	2073.88	2439.36	2243.25	3291.58	3946.68	7425.2	AT3G60245	NA	AT3G60245	NA
AT4G02360	147.851	1.11709	0.274581	4.06835	4.73466e-05	0.000336633	115.71	78.5664	78.3488	252.411	156.858	180.86	AT4G02360	NA	AT4G02360	NA
AT3G63410	1453.92	1.11685	0.182713	6.11261	9.80159e-10	2.19256e-08	449.489	599.386	541.569	917.549	976.248	1556.19	AT3G63410	APG1, E37, IEP37, VTE3	AT3G63410	Encodes a MPBQ/MSBQ methyltransferase located in the chloroplast inner envelope membrane. Mutant plants lack plastoquinone (PQ), suggesting that the APG1 protein is involved in the methylation step of PQ biosynthesis. The gene product is also involved in tocopherol (vitamin E) biosynthesis.
AT4G34120	255.288	1.1145	0.292883	3.80527	0.000141652	0.000871432	34.1197	101.376	53.6071	101.192	151.373	159.992	AT4G34120	CBSX2, CDCP1, LEJ1	AT4G34120	NA
AT2G44640	340.235	1.11439	0.271597	4.10309	4.07671e-05	0.000296586	118.677	168.538	141.578	194.425	259.967	474.013	AT2G44640	NA	AT2G44640	NA
AT4G22756	60.8815	1.11234	0.39473	2.81798	0.00483274	0.0175158	8.90078	8.8704	24.7417	39.7946	30.7134	21.8622	AT4G22756	ATSMO1-2, SMO1-2	AT4G22756	Encodes a member of the SMO1 family of sterol 4alpha-methyl oxidases. More specifically functions as a 4,4-dimethyl-9beta,19-cyclopropylsterol-4alpha- methyl oxidase.
AT1G57660	3025.53	1.11107	0.231659	4.79616	1.61736e-06	1.70256e-05	614.154	918.72	816.477	1206.34	1336.03	2533.04	AT1G57660	NA	AT1G57660	NA
AT5G62350	1621.02	1.11085	0.228139	4.86919	1.12056e-06	1.22729e-05	229.937	280.051	292.777	395.672	473.864	863.557	AT5G62350	NA	AT5G62350	NA
AT4G00850	145.925	1.11051	0.219576	5.05752	4.24751e-07	5.1942e-06	54.8882	53.2224	60.4798	146.671	92.1403	125.211	AT4G00850	GIF3	AT4G00850	Arabidopsis thaliana GRF1-interacting factor 3 (GIF3) mRNA
AT4G26150	1029.05	1.1105	0.168881	6.57567	4.84336e-11	1.38878e-09	471.741	638.669	685.895	1210.89	1069.49	1599.92	AT4G26150	CGA1, GATA22, GNL	AT4G26150	Encodes a member of the GATA factor family of zinc finger transcription factors.
AT5G06230	52.7271	1.10865	0.381064	2.90936	0.00362166	0.0137219	56.3716	55.7568	76.9742	153.493	161.245	93.4113	AT5G06230	TBL9	AT5G06230	Encodes a member of the TBL (TRICHOME BIREFRINGENCE-LIKE) gene family containing a plant-specific DUF231 (domain of unknown function) domain. TBL gene family has 46 members, two of which (TBR/AT5G06700 and TBL3/AT5G01360) have been shown to be involved in the synthesis and deposition of secondary wall cellulose, presumably by influencing the esterification state of pectic polymers. A nomenclature…
AT5G07090	7497.95	1.10783	0.192716	5.74853	9.00206e-09	1.65683e-07	2539.69	3188.28	3143.57	4844.71	5243.22	9032.08	AT5G07090	NA	AT5G07090	NA
AT1G19700	81.7562	1.10712	0.272003	4.07025	4.69621e-05	0.000334492	31.1527	24.0768	26.1163	65.9453	60.3299	48.6931	AT1G19700	BEL10, BLH10	AT1G19700	Encodes a member of the BEL family of homeodomain proteins. Its interaction with PLP (PAS/LOV PROTEIN) is diminished by blue light.
AT4G10550	72.7516	1.10709	0.343047	3.22724	0.00124991	0.00564359	16.3181	13.9392	31.6144	34.1096	40.5856	57.6367	AT4G10550	NA	AT4G10550	NA
AT3G09500	5469.41	1.10705	0.144303	7.67175	1.69668e-14	8.63112e-13	2483.32	2552.14	2507.16	4651.42	4658.57	6935.29	AT3G09500	NA	AT3G09500	NA
AT3G21800	250.524	1.10699	0.159516	6.93966	3.93057e-12	1.37488e-10	219.553	287.655	269.41	615.11	539.679	521.712	AT3G21800	UGT71B8	AT3G21800	NA
AT2G33060	203.733	1.1051	0.192152	5.75115	8.86368e-09	1.63586e-07	167.631	197.683	160.821	385.439	435.473	313.027	AT2G33060	AtRLP27, RLP27	AT2G33060	NA
AT5G10800	68.0955	1.10428	0.374974	2.94495	0.00323002	0.0124883	19.285	35.4816	50.858	75.0412	47.1671	105.336	AT5G10800	NA	AT5G10800	NA
AT1G23010	299.122	1.10334	0.141088	7.82025	5.27179e-15	2.88537e-13	189.883	234.432	232.297	526.425	465.089	423.332	AT1G23010	LPR1	AT1G23010	Encodes a protein with multicopper oxidase activity. Located in ER. Function together with LPR2 (AT1G71040) and a P5-type ATPase (At5g23630/PDR2) in a common pathway that adjusts root meristem activity to Pi (inorganic phosphate) availability.
AT4G20320	618.558	1.10307	0.145806	7.56537	3.86757e-14	1.84566e-12	568.167	638.669	646.034	1513.33	1157.24	1311.73	AT4G20320	CTPS4	AT4G20320	NA
AT5G62630	67.8855	1.1027	0.333434	3.30711	0.00094263	0.00443605	17.8016	17.7408	13.7454	25.0137	41.6825	38.7557	AT5G62630	HIPL2	AT5G62630	NA
AT2G41420	168.128	1.10242	0.33203	3.32023	0.000899419	0.00427719	44.5039	79.8336	70.1015	81.8631	212.8	124.217	AT2G41420	WIH2	AT2G41420	NA
AT3G52880	915.013	1.10212	0.304912	3.61453	0.000300887	0.00167799	121.644	375.091	273.533	389.987	529.807	736.359	AT3G52880	ATMDAR1, MDAR1	AT3G52880	Encodes a peroxisomal monodehydroascorbate reductase, involved in the ascorbate-glutathione cycle which removes toxic H2O2
AT4G09760	577.023	1.10171	0.1833	6.01042	1.85038e-09	3.95807e-08	430.204	352.282	365.628	1023.29	795.258	644.935	AT4G09760	CEK3	AT4G09760	encodes a choline synthase whose gene expression is induced by high salt and mannitol.
AT1G18650	119.162	1.1017	0.407319	2.70475	0.00683555	0.0234236	20.7685	22.8096	6.8727	20.4658	28.5196	58.6305	AT1G18650	PDCB3	AT1G18650	Encodes a member of the X8-GPI family of proteins. It localizes to the plasmodesmata and is predicted to bind callose.
AT3G56650	107.597	1.10054	0.251832	4.37012	1.24177e-05	0.000104399	69.7228	44.352	63.2288	154.63	98.7217	125.211	AT3G56650	PPD6	AT3G56650	NA
AT2G47690	212.604	1.10031	0.257129	4.27922	1.87552e-05	0.000149825	75.6566	98.8416	85.2215	143.26	149.18	264.334	AT2G47690	NA	AT2G47690	NA
AT5G45290	115.967	1.09955	0.239428	4.59242	4.38142e-06	4.17182e-05	48.9543	39.2832	31.6144	90.959	69.1052	95.3988	AT5G45290	NA	AT5G45290	NA
AT4G27790	26.4787	1.0994	0.428865	2.56351	0.0103619	0.0328872	40.0535	25.344	34.3635	96.644	57.0392	59.6242	AT4G27790	NA	AT4G27790	NA
AT1G25450	158.013	1.09816	0.203333	5.40081	6.63422e-08	9.90832e-07	94.9417	91.2384	96.2178	198.973	224.866	180.86	AT1G25450	CER60, KCS5	AT1G25450	Encodes KCS5, a member of the 3-ketoacyl-CoA synthase family involved in the biosynthesis of VLCFA (very long chain fatty acids).
AT4G26130	145.156	1.09627	0.282433	3.88151	0.000103809	0.000663045	71.2063	78.5664	74.2252	98.9179	166.73	212.66	AT4G26130	NA	AT4G26130	NA
AT3G18210	299.45	1.09353	0.179507	6.09184	1.11624e-09	2.47623e-08	84.5574	96.3072	105.84	180.781	197.443	233.528	AT3G18210	CP2	AT3G18210	NA
AT4G21770	305.676	1.09322	0.241077	4.5347	5.76842e-06	5.30594e-05	80.107	77.2992	109.963	123.932	187.571	257.378	AT4G21770	NA	AT4G21770	NA
AT1G20260	507.179	1.09316	0.181574	6.02045	1.73928e-09	3.74441e-08	191.367	291.456	257.039	419.549	511.159	649.904	AT1G20260	AtVAB3, VAB3	AT1G20260	NA
AT4G10030	324.734	1.09249	0.144241	7.57404	3.61793e-14	1.73895e-12	327.845	325.671	382.122	809.535	771.126	629.036	AT4G10030	ABHD11	AT4G10030	NA
AT5G08600	165.277	1.09146	0.259804	4.20108	2.65646e-05	0.000203515	59.3385	57.024	56.3561	78.4522	141.501	147.073	AT5G08600	NA	AT5G08600	NA
AT5G48650	35.4304	1.09101	0.410815	2.65573	0.00791377	0.0264227	28.1858	30.4128	17.869	80.7261	32.9072	49.6869	AT5G48650	G3BP-like	AT5G48650	NA
AT1G19565	22.6357	1.09071	0.423437	2.57586	0.00999912	0.0319739	29.6693	24.0768	27.4908	63.6713	62.5238	46.7056	AT1G19565	NA	AT1G19565	NA
AT1G17840	646.313	1.09024	0.306682	3.55497	0.000378026	0.00204414	106.809	143.194	127.832	128.48	241.32	434.263	AT1G17840	ABCG11, AtABCG11, ATWBC11, COF1, DSO, WBC11	AT1G17840	Encodes a plasma membrane-localized ATP-binding cassette transporter, that is required for cutin transport to the extracellular matrix.
AT5G05580	108.756	1.08953	0.334177	3.26033	0.00111282	0.00511919	29.6693	43.0848	35.738	37.5206	92.1403	101.361	AT5G05580	AtFAD8, FAD8	AT5G05580	Encodes a temperature sensitive plastidic fatty acid desaturase.
AT3G14420	783.591	1.08908	0.139909	7.7842	7.0155e-15	3.78895e-13	284.825	340.877	317.519	573.042	648.273	786.046	AT3G14420	GOX1	AT3G14420	NA
AT5G62890	415.814	1.08801	0.210896	5.15901	2.48258e-07	3.19784e-06	105.326	120.384	94.8433	178.507	194.153	308.058	AT5G62890	NA	AT5G62890	NA
AT2G21660	9005.13	1.08694	0.236439	4.59712	4.28373e-06	4.09046e-05	2653.92	3662.21	3649.4	4513.84	6141.59	10513.7	AT2G21660	ATGRP7, CCR2, GR-RBP7, GRP7, RBGA3, SRBP1	AT2G21660	Encodes a small glycine-rich RNA binding protein that is part of a negative-feedback loop through which AtGRP7 regulates the circadian oscillations of its own transcript. Gene expression is induced by cold. GRP7 appears to promote stomatal opening and reduce tolerance under salt and dehydration stress conditions, but, promotes stomatal closing and thereby increases stress tolerance under conditio…
AT2G47610	7658.22	1.08688	0.199099	5.45898	4.78877e-08	7.41741e-07	2582.71	3323.87	3182.06	4795.81	5262.97	9246.72	AT2G47610	NA	AT2G47610	NA
AT5G11890	65.2296	1.08653	0.338736	3.20761	0.00133842	0.00596927	37.0866	46.8864	42.6107	102.329	75.6867	91.4238	AT5G11890	EMB3135	AT5G11890	NA
AT3G12290	369.836	1.08614	0.185467	5.85623	4.73492e-09	9.23171e-08	207.685	255.975	263.912	451.384	472.767	621.086	AT3G12290	MTHFD1	AT3G12290	NA
AT5G23740	2809.03	1.086	0.176383	6.15708	7.41004e-10	1.69737e-08	900.462	1186.1	1021.28	1886.26	1762.73	2949.41	AT5G23740	RPS11-BETA	AT5G23740	Encodes a putative ribosomal protein S11 (RPS11-beta).
AT4G01150	485.807	1.08564	0.230433	4.71132	2.46115e-06	2.47883e-05	250.705	309.197	270.784	457.069	474.961	830.764	AT4G01150	CURT1A	AT4G01150	NA
AT2G36320	1283.39	1.08303	0.117121	9.24711	2.30647e-20	2.71933e-18	1047.33	988.416	1039.15	2454.76	2128	1931.82	AT2G36320	NA	AT2G36320	NA
AT5G41460	90.3916	1.08121	0.334339	3.23387	0.00122126	0.00553649	56.3716	41.8176	34.3635	87.5481	97.6248	94.405	AT5G41460	NA	AT5G41460	NA
AT2G45990	209.112	1.08031	0.222926	4.84603	1.25955e-06	1.36313e-05	75.6566	100.109	104.465	143.26	218.285	231.541	AT2G45990	NA	AT2G45990	NA
AT4G31230	24.2855	1.07962	0.367159	2.94047	0.00327714	0.0126339	35.6031	26.6112	28.8653	60.2604	68.0083	63.5992	AT4G31230	NA	AT4G31230	NA
AT4G04955	338.26	1.07931	0.205345	5.25607	1.47168e-07	2.0245e-06	41.537	50.688	54.9816	94.37	117.369	100.367	AT4G04955	ALN, ATALN	AT4G04955	Encodes an allantoinase which is involved in allantoin degradation and assimilation. Gene expression was induced when allantoin was added to the medium. The insertion mutant, ataln m2-1, did not grow well on the MS medium where allantoin, instead of ammonium nitrate, was supplied.
AT1G69760	988.937	1.07832	0.167058	6.45475	1.08396e-10	2.87e-09	775.851	683.021	948.433	1845.33	1817.58	1420.05	AT1G69760	NA	AT1G69760	NA
AT2G23910	80.8915	1.07822	0.358356	3.00881	0.00262277	0.0105559	23.7354	46.8864	27.4908	47.7535	66.9114	93.4113	AT2G23910	NA	AT2G23910	NA
AT3G54270	40.9346	1.07806	0.325558	3.31142	0.000928234	0.00438477	25.2189	26.6112	24.7417	50.0275	57.0392	54.6555	AT3G54270	NA	AT3G54270	NA
AT4G15233	109.857	1.07792	0.370782	2.90714	0.00364752	0.0138094	45.9874	76.032	104.465	93.233	255.58	130.18	AT4G15233	ABCG42	AT4G15233	NA
AT5G50180	166	1.07767	0.201996	5.33509	9.54986e-08	1.37308e-06	84.5574	88.704	93.4687	208.069	150.276	204.71	AT5G50180	NA	AT5G50180	NA
AT4G20260	374.575	1.07651	0.247111	4.35638	1.32233e-05	0.000110431	204.718	356.083	306.522	703.796	718.475	410.413	AT4G20260	ATPCAP1, MDP25, PCAP1	AT4G20260	Encodes a Ca2+ and Cu2+ binding protein. N-terminal myristylation on glycine 2 appears to enable it to associate tightly with the plasma membrane. Recombinant PCaP1 interacts strongly with phosphatidylinositol 3,5-bisphosphate (PtdIns(3,5)P2) and PtdIns (3,4,5)P3, and weakly with PtdIns(3,5)P2 and PtdIns(4,5). It also interacts with calmodulin (CaM) in a calcium-dependent manner. CaM does not int…
AT5G59850	3792.25	1.07581	0.20447	5.26145	1.42926e-07	1.9702e-06	955.351	1115.14	1110.63	1685.02	1746.28	3273.37	AT5G59850	NA	AT5G59850	NA
AT1G12400	134.579	1.07448	0.207988	5.16606	2.39077e-07	3.08752e-06	86.0409	49.4208	76.9742	148.945	134.92	159.992	AT1G12400	NA	AT1G12400	NA
AT1G06693	39.7269	1.07393	0.435014	2.46872	0.0135597	0.0409242	40.0535	27.8784	43.9853	69.3563	81.1712	84.4676	AT1G06693	NA	AT1G06693	NA
AT3G51820	209.17	1.07315	0.324516	3.30693	0.000943247	0.00443791	111.26	129.254	166.319	211.48	189.765	454.138	AT3G51820	ATG4, CHLG, G4, PDE325	AT3G51820	Encodes a protein with chlorophyll synthase activity. This enzyme has been shown to perform the esterification of chlorophyllide (a and b), the last step of chlorophyll biosynthesis. Although it can use either geranylgeranyl pyrophosphate (GGPP) or phytyl pyrophosphate (PhyPP) as substrates, the esterification reaction was faster with GGPP than with PhyPP.
AT2G39080	164.229	1.07283	0.24151	4.44217	8.90551e-06	7.76732e-05	66.7559	48.1536	39.8617	87.5481	106.4	129.186	AT2G39080	EMB2799	AT2G39080	NA
AT3G53450	23.2111	1.07083	0.420819	2.54463	0.0109393	0.0343499	14.8346	8.8704	19.2436	28.4247	24.132	36.7683	AT3G53450	LOG4	AT3G53450	NA
AT3G55350	74.9566	1.07075	0.380249	2.81591	0.00486386	0.0176138	8.90078	29.1456	12.3709	38.6576	27.4227	41.737	AT3G55350	NA	AT3G55350	NA
AT1G54630	787.738	1.07011	0.14018	7.63379	2.27945e-14	1.13367e-12	234.387	319.335	307.897	603.741	517.741	690.647	AT1G54630	ACP3, AtACP3	AT1G54630	encodes an acyl carrier protein expressed in leaves, roots, and dry seeds. Gene expression is not regulated by light.
AT1G44790	79.043	1.07006	0.440162	2.43106	0.0150547	0.0444982	10.3842	10.1376	8.24724	9.0959	17.5505	32.7933	AT1G44790	NA	AT1G44790	NA
AT1G72410	476.488	1.06976	0.237081	4.51223	6.41504e-06	5.81642e-05	145.379	166.003	240.544	280.836	343.332	533.637	AT1G72410	NA	AT1G72410	NA
AT2G48020	160.96	1.06965	0.188193	5.68378	1.31749e-08	2.33273e-07	83.074	78.5664	67.3525	179.644	163.439	138.129	AT2G48020	ZIF2	AT2G48020	NA
AT3G49410	157.264	1.06897	0.402426	2.65632	0.00789994	0.0263854	10.3842	26.6112	20.6181	34.1096	19.7443	67.5741	AT3G49410	NA	AT3G49410	NA
AT5G57970	70.5372	1.06884	0.404988	2.6392	0.00831031	0.0274585	8.90078	30.4128	4.12362	31.8357	31.8103	29.8121	AT5G57970	NA	AT5G57970	NA
AT3G48980	92.5678	1.06842	0.296062	3.60879	0.000307632	0.00171036	93.4582	59.5584	86.596	139.85	134.92	225.578	AT3G48980	NA	AT3G48980	NA
ATCG00220	30.4019	1.06779	0.437124	2.44277	0.0145751	0.0433346	17.8016	29.1456	45.3598	89.822	54.8454	49.6869	ATCG00220	PSBM	ATCG00220	PSII low MW protein
AT5G08120	144.521	1.0675	0.282145	3.7835	0.00015464	0.000942939	66.7559	69.696	122.334	144.397	167.827	229.553	AT5G08120	MPB2C	AT5G08120	Microtubule-associated and viral movement protein binding protein. Negatively regulates KN1 association to plasmodesmata and, consequently, cell-to-cell transport. Involved in the alignment of cortical microtubules, the patterning of stomata and in restricting tobamoviral infections.
AT3G04840	7935.58	1.06678	0.214039	4.98403	6.22736e-07	7.32482e-06	1685.21	2082.01	1933.98	2862.94	3131.67	5947.52	AT3G04840	NA	AT3G04840	NA
AT5G41180	76.2965	1.06642	0.314128	3.39485	0.000686666	0.0034253	28.1858	35.4816	53.6071	60.2604	117.369	68.5679	AT5G41180	NA	AT5G41180	NA
AT4G32690	79.29	1.06602	0.321211	3.31875	0.000904224	0.0042926	35.6031	17.7408	27.4908	71.6302	54.8454	41.737	AT4G32690	AHb3, ATGLB3, GLB3	AT4G32690	Encodes a hemoglobin (Hb) with a central domain similar to the 'truncated Hbs of bacteria, protozoa and fungi. The 3D structure of these types of Hbs is a 2-on-2 arrangement of alpha-helices as opposed to the 3-on-3 arrangement of the standard globin fold. This type of Hb is not found in animals or yeast.
AT3G03460	58.924	1.06584	0.384227	2.77399	0.00553731	0.0196051	34.1197	30.4128	9.62178	36.3836	51.5547	66.5804	AT3G03460	NA	AT3G03460	NA
AT2G01010	2022.28	1.06449	0.251335	4.23532	2.28222e-05	0.000178264	2122.84	2411.48	1883.12	6036.27	3179.94	4206.49	AT2G01010	NA	AT2G01010	NA
AT1G10960	797.971	1.06384	0.267919	3.97076	7.16441e-05	0.000481544	117.194	176.141	101.716	166	270.936	389.545	AT1G10960	ATFD1, FD1	AT1G10960	NA
AT5G01590	910.197	1.06331	0.212497	5.00387	5.6191e-07	6.66806e-06	296.693	240.768	328.515	485.494	459.605	861.57	AT5G01590	TIC56	AT5G01590	NA
AT5G37360	127.711	1.05992	0.227894	4.65095	3.30414e-06	3.22733e-05	34.1197	58.2912	60.4798	113.699	87.7527	119.248	AT5G37360	NA	AT5G37360	NA
AT4G17910	80.5698	1.05858	0.357187	2.96365	0.00304012	0.0119033	20.7685	13.9392	19.2436	28.4247	50.4578	32.7933	AT4G17910	NA	AT4G17910	NA
AT3G22480	839.93	1.05567	0.109517	9.63935	5.453e-22	7.5899e-20	566.683	666.548	698.266	1232.49	1298.74	1485.64	AT3G22480	PDF2	AT3G22480	NA
AT5G13690	477.381	1.05531	0.129977	8.11925	4.69082e-16	3.00377e-14	210.652	261.043	239.17	433.192	516.644	529.662	AT5G13690	CYL1, NAGLU	AT5G13690	Encodes an enzyme that is predicted to act as an alpha-N-acetylglucosaminidase (NAGLU). An naglu mutant arrests early in seed development but does not appear to have male or female gametophytic defects. Transcript levels for this gene are increased during reproductive development.
AT1G57620	110.66	1.05525	0.31335	3.36765	0.000758117	0.00372585	31.1527	45.6192	46.7344	46.6165	100.916	109.311	AT1G57620	CYB	AT1G57620	NA
AT1G75800	5185.74	1.0551	0.120079	8.78678	1.53908e-18	1.45076e-16	4291.66	5339.98	4986.83	8628.6	10412.9	11336.6	AT1G75800	NA	AT1G75800	NA
AT1G29310	172.156	1.05505	0.426239	2.47527	0.0133137	0.0402847	19.285	45.6192	38.4871	35.2466	102.012	78.5052	AT1G29310	Sec.	AT1G29310	NA
AT2G20850	108.148	1.05484	0.293696	3.59161	0.000328641	0.00180712	28.1858	22.8096	19.2436	47.7535	38.3918	58.6305	AT2G20850	SRF1	AT2G20850	NA
AT3G27850	1662.04	1.05295	0.215377	4.88888	1.01409e-06	1.12607e-05	847.058	959.271	863.211	1414.41	1419.4	2703.96	AT3G27850	RPL12-C	AT3G27850	50S ribosomal protein L12-C
AT5G03940	891.686	1.0521	0.218955	4.80511	1.54668e-06	1.63675e-05	422.787	386.496	608.921	790.207	794.162	1354.46	AT5G03940	54CP, CPSRP54, FFC, SRP54CP	AT5G03940	mutant has Yellow first leaves; Chloroplast Signal Recognition Particle Subunit
AT1G10350	61.128	1.05157	0.328055	3.20546	0.00134848	0.00600479	29.6693	34.2144	34.3635	50.0275	52.6516	100.367	AT1G10350	NA	AT1G10350	NA
AT5G35080	263.661	1.05089	0.18451	5.69556	1.22966e-08	2.19274e-07	120.161	108.979	133.33	314.946	238.029	198.747	AT5G35080	AtOS9, OS9	AT5G35080	NA
AT1G29170	323.221	1.05034	0.238981	4.3951	1.1072e-05	9.43921e-05	62.3055	62.0928	89.3451	114.836	120.66	205.704	AT1G29170	ATSCAR3, SCAR3, WAVE2	AT1G29170	Encodes a member of the SCAR family.These proteins are part of a complex (WAVE) complex.The SCAR subunit activates the ARP2/3 complex which in turn act as a nucleator for actin filaments.
AT3G26240	394.275	1.05032	0.122353	8.58433	9.13699e-18	7.66245e-16	397.568	433.383	494.834	862.974	994.896	889.395	AT3G26240	NA	AT3G26240	NA
AT4G03415	349.233	1.0491	0.188697	5.5597	2.70241e-08	4.43245e-07	127.578	127.987	118.21	211.48	218.285	341.846	AT4G03415	PP2C52	AT4G03415	NA
AT3G13580	2210.67	1.04863	0.200657	5.226	1.73215e-07	2.3363e-06	606.737	698.228	696.892	1456.48	1044.26	1640.66	AT3G13580	NA	AT3G13580	NA
AT3G21465	115.202	1.04856	0.293558	3.57189	0.000354413	0.00192884	20.7685	36.7488	27.4908	37.5206	61.4269	77.5115	AT3G21465	NA	AT3G21465	NA
AT1G78080	2456.67	1.04529	0.154829	6.75125	1.46573e-11	4.61912e-10	888.595	622.196	809.604	1470.13	1843.9	1470.73	AT1G78080	AtWIND1, RAP2.4, WIND1	AT1G78080	Encodes a member of the DREB subfamily A-6 of ERF/AP2 transcription factor family (RAP2.4). The protein contains one AP2 domain. Role in mediating light and ethylene signaling.
AT4G28030	56.2749	1.04399	0.371194	2.81252	0.00491543	0.0177481	32.6362	26.6112	38.4871	51.1645	108.594	41.737	AT4G28030	NA	AT4G28030	NA
AT4G02050	243.007	1.0432	0.17604	5.92591	3.10571e-09	6.31316e-08	134.995	136.858	164.945	301.302	265.452	332.902	AT4G02050	STP7	AT4G02050	NA
AT2G37600	1330.5	1.04265	0.187389	5.56409	2.63526e-08	4.34363e-07	390.151	434.65	456.347	682.193	730.541	1225.28	AT2G37600	NA	AT2G37600	NA
AT5G50420	49.8715	1.04182	0.401635	2.59394	0.00948835	0.0305994	19.285	12.672	8.24724	21.6028	25.2289	34.7808	AT5G50420	NA	AT5G50420	NA
AT5G52030	46.3285	1.04174	0.3549	2.9353	0.00333225	0.012813	14.8346	34.2144	31.6144	50.0275	66.9114	50.6806	AT5G52030	NA	AT5G52030	NA
AT2G41560	1660.88	1.04146	0.237186	4.39091	1.12876e-05	9.60259e-05	237.354	323.136	325.766	469.576	445.345	909.269	AT2G41560	ACA4	AT2G41560	encodes a calmodulin-regulated Ca(2+)-ATPase that improves salt tolerance in yeast. localized to the vacuole.
AT4G00380	290.226	1.04002	0.225975	4.60238	4.17689e-06	3.99225e-05	105.326	186.278	175.941	247.863	292.874	422.338	AT4G00380	FDM2, IDP2, INDL2	AT4G00380	NA
AT5G62690	4153.63	1.03894	0.192071	5.40917	6.33184e-08	9.51342e-07	1302.48	1847.58	1641.2	2396.77	2978.11	4470.82	AT5G62690	TUB2	AT5G62690	encodes tubulin beta-2/beta-3 chain
AT1G77530	127.541	1.03856	0.230897	4.49793	6.86194e-06	6.1564e-05	140.929	138.125	144.327	344.507	298.359	227.566	AT1G77530	NA	AT1G77530	NA
AT4G35550	149.036	1.03855	0.186352	5.57307	2.50286e-08	4.18041e-07	91.9747	131.789	108.589	221.713	212.8	250.422	AT4G35550	ATWOX13, HB-4, WOX13	AT4G35550	Encodes a WUSCHEL-related homeobox gene family member with 65 amino acids in its homeodomain. WOX13 is the only family member that does not contain a sequence of eight residues (TLPLFPMH) downstream of the homeodomain called the WUS box.
AT5G04470	79.7981	1.03839	0.292418	3.55105	0.000383692	0.00206952	54.8882	59.5584	50.858	155.767	106.4	78.5052	AT5G04470	SIM	AT5G04470	Encodes a novel nuclear 14-kD protein containing a cyclin binding motif and a motif found in ICK/KRP cell cycle inhibitor proteins. It is required for coordinating cell division and cell differentiation during the development of Arabidopsis trichomes, playing a key role in the mitosis-to-endoreduplication transition. It interacts with D-type cyclins in vivo.
AT4G35770	567.079	1.03814	0.200946	5.16628	2.38793e-07	3.08583e-06	593.385	581.645	658.405	1466.71	1122.14	1176.58	AT4G35770	ATSEN1, DIN1, SEN1	AT4G35770	Senescence-associated gene that is strongly induced by phosphate starvation. Transcripts are differentially regulated at the level of mRNA stability at different times of day. mRNAs are targets of the mRNA degradation pathway mediated by the downstream (DST) instability determinant.
AT3G45230	60.2667	1.03691	0.429709	2.41305	0.0158195	0.0463349	17.8016	10.1376	10.9963	40.9316	20.8413	17.8873	AT3G45230	APAP1	AT3G45230	NA
AT4G37550	608.362	1.03657	0.13056	7.93942	2.03131e-15	1.19746e-13	348.614	338.343	356.006	621.932	694.343	820.827	AT4G37550	IAMH1	AT4G37550	NA
AT5G14040	4584.86	1.03496	0.254927	4.05982	4.91098e-05	0.000347444	777.335	1463.62	1052.9	1446.25	1986.5	3318.09	AT5G14040	MPT3, PHT3;1	AT5G14040	NA
AT2G46620	54.6388	1.03454	0.424071	2.43955	0.0147057	0.0436596	22.252	62.0928	53.6071	51.1645	150.276	82.4802	AT2G46620	NA	AT2G46620	NA
AT4G25080	588.246	1.03362	0.227863	4.53614	5.72919e-06	5.27712e-05	375.316	320.602	364.253	512.782	662.533	992.743	AT4G25080	CHLM	AT4G25080	Encodes a protein with methyltransferase activity responsible for the methylation of magnesium protoporphyrin IX. Mutants defective in this gene are affected in chlorophyll biosynthesis and show a reduction in the accumulation of a number of major thylakoid-associated proteins including components of PSI (LHCI), PSII (LHCII, D1, CP43) and the cytochrome b6f complex (Cytf). By contrast, no signifi…
AT1G21150	49.9413	1.03325	0.353048	2.92667	0.00342615	0.0131025	23.7354	22.8096	15.1199	46.6165	29.6165	49.6869	AT1G21150	mTERF27	AT1G21150	NA
AT4G28220	170.158	1.03206	0.243963	4.23039	2.33287e-05	0.000181583	62.3055	44.352	59.1052	75.0412	129.435	132.167	AT4G28220	NDB1	AT4G28220	NA
AT1G19180	236.691	1.03125	0.190284	5.41953	5.97559e-08	9.03916e-07	142.413	129.254	114.087	203.521	321.394	262.347	AT1G19180	AtJAZ1, JAZ1, TIFY10A	AT1G19180	JAZ1 is a nuclear-localized protein involved in jasmonate signaling. JAZ1 transcript levels rise in response to a jasmonate stimulus. JAZ1 can interact with the COI1 F-box subunit of an SCF E3 ubiquitin ligase in a yeast-two-hybrid assay only in the presence of jasmonate-isoleucine (JA-ILE) or coronatine. Application of jasmonate methyl ester to Arabidopsis roots reduces the levels of a JAZ1:GUS …
AT3G27050	69.6305	1.03102	0.359392	2.86878	0.00412065	0.0153456	23.7354	26.6112	19.2436	29.5617	38.3918	73.5365	AT3G27050	NA	AT3G27050	NA
AT5G62530	335.977	1.03075	0.19296	5.34179	9.2033e-08	1.33185e-06	182.466	236.967	202.057	364.973	371.852	533.637	AT5G62530	ALDH12A1, ATP5CDH, P5CDH	AT5G62530	Encodes mitochondrial Delta-pyrroline-5- carboxylate dehydrogenase. Involved in the catabolism of proline to glutamate. Involved in protection from proline toxicity. Induced at pathogen infection sites. P5CDH and SRO5 (an overlapping gene in the sense orientation) generate 24-nt and 21-nt siRNAs, which together are components of a regulatory loop controlling reactive oxygen species (ROS) producti…
AT5G16240	97.3978	1.03072	0.28662	3.59613	0.000322991	0.0017829	29.6693	27.8784	37.1126	65.9453	48.264	78.5052	AT5G16240	AAD1	AT5G16240	NA
AT5G24300	1106.07	1.03016	0.195063	5.28118	1.28354e-07	1.78529e-06	229.937	245.837	230.923	360.425	402.565	678.722	AT5G24300	ATSS1, SS1	AT5G24300	SSI is a plastidial enzyme and crucial for the synthesis of normal amylopectin in the leaves of Arabidopsis. The absence of SSI results in a deficiency in the number of shorter glucans which in turn affect the formation and connection of the amylopectin clusters in starch.
AT3G19360	208.826	1.02869	0.259851	3.95877	7.53367e-05	0.000502822	25.2189	34.2144	27.4908	39.7946	71.299	66.5804	AT3G19360	NA	AT3G19360	NA
AT4G35560	122.461	1.02744	0.188256	5.45766	4.82452e-08	7.46702e-07	109.776	100.109	127.832	226.261	223.769	237.503	AT4G35560	DAW1, TMS-like	AT4G35560	NA
AT4G26730	18.78	1.02724	0.423692	2.4245	0.0153294	0.0451561	28.1858	20.2752	24.7417	57.9864	47.1671	43.7244	AT4G26730	NA	AT4G26730	NA
AT4G29480	761.193	1.0272	0.15739	6.52651	6.73198e-11	1.87662e-09	422.787	410.573	445.351	724.261	751.382	1127.89	AT4G29480	NA	AT4G29480	NA
AT1G28510	149.18	1.02692	0.345571	2.97166	0.00296191	0.0116586	19.285	21.5424	35.738	29.5617	46.0701	79.499	AT1G28510	NA	AT1G28510	NA
AT4G17600	252.509	1.02608	0.301096	3.40781	0.000654867	0.0032896	157.247	112.781	115.461	191.014	185.377	406.438	AT4G17600	LIL3:1	AT4G17600	Encodes Lil3:1 (light-harvesting-like) protein. Belongs to the Lhc super-gene family encodes the light-harvesting chlorophyll a/b-binding (LHC) proteins that constitute the antenna system of the photosynthetic apparatus. A generic LHC motif is present in Lil3:1.
AT1G01300	7118.82	1.0254	0.126723	8.09169	5.88447e-16	3.72058e-14	1852.85	1800.69	1950.47	3326.83	3674.64	4403.25	AT1G01300	NA	AT1G01300	NA
AT3G45660	79.8877	1.02521	0.292532	3.50461	0.000457272	0.00240239	84.5574	140.659	87.9706	229.672	238.029	171.917	AT3G45660	NA	AT3G45660	NA
AT3G29280	83.2703	1.02501	0.254317	4.03044	5.56737e-05	0.000388128	41.537	35.4816	39.8617	62.5343	87.7527	86.4551	AT3G29280	NA	AT3G29280	NA
AT2G32650	168.839	1.02473	0.23308	4.39647	1.10024e-05	9.38786e-05	97.9086	68.4288	92.0942	171.685	136.017	215.641	AT2G32650	NA	AT2G32650	NA
AT5G02120	42.2428	1.02435	0.430419	2.3799	0.0173176	0.0498629	16.3181	12.672	8.24724	34.1096	18.6474	22.856	AT5G02120	OHP, OHP1, PDE335	AT5G02120	Encodes a one helix protein homologous to cyanobacterial high-light inducible proteins. The protein is localized to the thylakoid membrane and its transcript is transiently induced by exposure to high light conditions.
AT4G25070	42.0494	1.02383	0.326821	3.13269	0.0017321	0.00742124	47.4708	44.352	49.4834	97.781	89.9465	99.3737	AT4G25070	NA	AT4G25070	NA
AT3G52920	291.672	1.02356	0.137186	7.46109	8.5807e-14	3.88223e-12	155.764	164.736	160.821	325.179	330.169	323.958	AT3G52920	NA	AT3G52920	NA
AT2G24020	929.055	1.02338	0.178771	5.72454	1.03715e-08	1.88636e-07	357.515	432.115	335.388	671.96	614.269	1000.69	AT2G24020	STIC2	AT2G24020	NA
AT2G22470	261.526	1.02193	0.290579	3.51688	0.000436645	0.00231526	281.858	342.144	265.286	550.302	852.298	404.451	AT2G22470	AGP2, ATAGP2	AT2G22470	Encodes arabinogalactan-protein (AGP2).
AT1G52720	258.898	1.02066	0.179932	5.67249	1.40736e-08	2.46786e-07	191.367	236.967	233.672	405.905	446.442	491.9	AT1G52720	NA	AT1G52720	NA
AT3G07870	27.0353	1.02049	0.419801	2.43089	0.0150619	0.0444997	25.2189	19.008	32.989	75.0412	43.8763	37.762	AT3G07870	FBX92	AT3G07870	NA
AT4G32570	236.532	1.0196	0.229367	4.4453	8.77685e-06	7.68192e-05	78.6236	91.2384	70.1015	151.219	116.272	218.622	AT4G32570	TIFY8	AT4G32570	NA
AT4G29220	65.9264	1.01916	0.409677	2.48772	0.0128564	0.0391671	14.8346	35.4816	17.869	30.6987	70.2021	38.7557	AT4G29220	PFK1	AT4G29220	NA
AT5G28060	3663.09	1.01868	0.215716	4.7223	2.33187e-06	2.36169e-05	1105.18	1482.62	1483.13	2113.66	2102.77	4031.59	AT5G28060	RPS24B	AT5G28060	NA
AT5G62300	4596.92	1.01702	0.144195	7.05307	1.75009e-12	6.48373e-11	1959.66	2279.69	2136.04	3595.16	3807.37	5499.34	AT5G62300	NA	AT5G62300	NA
AT3G16500	409.335	1.01678	0.17055	5.96177	2.49516e-09	5.16638e-08	200.268	314.266	261.163	566.22	451.926	555.499	AT3G16500	IAA26, PAP1	AT3G16500	phytochrome-associated protein 1 (PAP1)
AT3G08740	1238.41	1.01591	0.193418	5.2524	1.50132e-07	2.05983e-06	667.559	704.564	712.012	1180.19	1067.29	1965.61	AT3G08740	NA	AT3G08740	NA
AT5G06570	506.475	1.01567	0.157361	6.45442	1.08634e-10	2.87249e-09	502.894	617.127	606.172	1194.97	1219.76	1078.2	AT5G06570	NA	AT5G06570	NA
AT4G31700	7730.81	1.01524	0.253142	4.01056	6.05756e-05	0.000416323	1404.84	1732.26	1742.92	2051.13	2547.02	5264.82	AT4G31700	AtRPS6, RPS6, RPS6A	AT4G31700	Encodes a putative ribosomal protein S6 (rps6a). RPS6A and RPS6B are fully redundant and essential during gametogenesis.
AT2G29510	356.347	1.01511	0.126953	7.99596	1.28563e-15	7.83221e-14	180.983	152.064	159.447	303.576	344.429	343.833	AT2G29510	NA	AT2G29510	NA
AT4G23650	534.168	1.01434	0.190132	5.33491	9.55913e-08	1.37343e-06	175.049	254.707	247.417	357.014	438.763	573.386	AT4G23650	AtCDPK6, CDPK6, CPK3	AT4G23650	Encodes calcium dependent protein kinase 3 (CPK3), a member of the Arabidopsis CDPK gene family. CDPKs contain an intrinsic Ca2+-activation domain with four EF hand Ca2+-binding sites. CDPKs protein kinases have been proposed to function in multiple plant signal transduction pathways downstream of [Ca2+]cyt elevations, thus transducing various physiological responses. CPK3 is expressed in both gu…
AT4G31600	124.43	1.01265	0.322755	3.13753	0.00170378	0.00730823	19.285	16.4736	12.3709	40.9316	28.5196	27.8246	AT4G31600	UTr7	AT4G31600	NA
AT1G51110	59.9307	1.01193	0.383398	2.63937	0.00830605	0.027449	44.5039	45.6192	49.4834	97.781	95.431	88.4426	AT1G51110	FBN10	AT1G51110	NA
AT4G33800	181.452	1.00984	0.205241	4.92027	8.64241e-07	9.78643e-06	191.367	135.59	178.69	400.22	321.394	295.14	AT4G33800	NA	AT4G33800	NA
AT2G35500	190.28	1.0096	0.224838	4.49034	7.11094e-06	6.33724e-05	89.0078	83.6352	82.4724	140.986	153.567	217.628	AT2G35500	SKL2	AT2G35500	NA
AT4G19160	2357.82	1.00854	0.121193	8.32172	8.66924e-17	6.07544e-15	597.836	685.556	607.547	1341.65	1160.53	1304.78	AT4G19160	NA	AT4G19160	NA
AT5G15780	11949.9	1.00818	0.120057	8.39748	4.56168e-17	3.34908e-15	10719.5	11425.1	11261.6	21744.9	20262.1	25185.3	AT5G15780	NA	AT5G15780	NA
AT5G02370	41.3719	1.00791	0.381373	2.64284	0.00822139	0.0272321	37.0866	35.4816	26.1163	70.4932	47.1671	80.4927	AT5G02370	NA	AT5G02370	NA
AT4G14780	122.677	1.0079	0.278329	3.62127	0.000293166	0.00164132	89.0078	76.032	54.9816	189.877	140.404	112.292	AT4G14780	NA	AT4G14780	NA
AT1G32740	316.058	1.00673	0.175794	5.72675	1.02371e-08	1.86868e-07	172.082	206.554	193.81	438.877	299.456	413.395	AT1G32740	NA	AT1G32740	NA
AT5G17920	7320.19	1.00628	0.228881	4.39653	1.09996e-05	9.38786e-05	2103.55	3331.47	2678.98	3678.16	5043.58	7578.24	AT5G17920	ATCIMS, ATMETS, ATMS1, METS1	AT5G17920	Encodes a cytosolic cobalamin-independent methionine synthase, involved in methionine regeneration via the activated methyl cycle (SAM cycle). The protein undergoes thiolation following treatment with the oxidant tert-butylhydroperoxide.
AT5G59150	217.505	1.00612	0.22296	4.51255	6.40516e-06	5.81161e-05	41.537	70.9632	78.3488	112.562	114.078	158.004	AT5G59150	ATRAB-A2D, ATRABA2D, RABA2D	AT5G59150	NA
AT1G60860	369.343	1.00565	0.129196	7.7839	7.03232e-15	3.78895e-13	186.916	211.623	163.57	364.973	353.204	411.407	AT1G60860	AGD2, VAL2	AT1G60860	A member of ARF GAP domain (AGD), A thaliana has 15 members, grouped into four classes. AGD2 belongs to the class 1, together with AGD1, AGD3, and AGD4.
AT1G72180	39.5694	1.00527	0.327302	3.07138	0.00213073	0.00881084	32.6362	21.5424	27.4908	57.9864	64.7176	40.7432	AT1G72180	CEPR2	AT1G72180	NA
AT1G22275	53.7859	1.00412	0.28016	3.5841	0.000338237	0.00185277	48.9543	57.024	31.6144	101.192	78.9774	96.3925	AT1G22275	ZYP1, ZYP1b	AT1G22275	One of two nearly identical proteins (ZYP1a) identified by similarity to transverse filament (TF) proteins. These proteins are involved in chromosome synapsis during meiosis I and localize to the synaptonemal complex (SC). Single mutants have reduced fertility and double mutants (induced by RNAi) have severely reduced fertility.
AT3G22880	52.5936	1.00313	0.318053	3.15398	0.0016106	0.00697821	22.252	35.4816	23.3672	48.8905	73.4928	41.737	AT3G22880	ARLIM15, ATDMC1, DMC1	AT3G22880	Expression of the AtDMC1 is restricted to pollen mother cells in anthers and to megaspore mother cells in ovules. Similar to meiosis-specific yeast DMC gene.
AT1G42480	185.963	1.00307	0.257114	3.90125	9.56955e-05	0.000615344	51.9212	48.1536	41.2362	70.4932	93.2372	118.255	AT1G42480	NA	AT1G42480	NA
AT2G37790	140.087	1.00268	0.321233	3.12136	0.00180016	0.00765556	51.9212	57.024	81.0979	77.3152	111.885	190.798	AT2G37790	AKR4C10	AT2G37790	NA
AT2G46030	203.709	1.00208	0.226679	4.42069	9.83856e-06	8.49975e-05	200.268	191.347	153.948	457.069	352.108	284.209	AT2G46030	UBC6	AT2G46030	Ubiquitin conjugating enzyme E2
AT4G10613	22.8527	-7.46593	1.25454	-5.95114	2.66283e-09	5.47957e-08	35.6031	45.6192	23.3672	0	0	0	AT4G10613	NA	AT4G10613	NA
AT4G27670	169.41	-6.47951	0.410663	-15.7782	4.39737e-56	6.77974e-53	597.836	615.86	522.325	10.2329	9.87217	0	AT4G27670	HSP21	AT4G27670	chloroplast located small heat shock protein.
AT1G70720	12.6891	-6.23228	1.32445	-4.70555	2.53186e-06	2.53857e-05	8.90078	20.2752	15.1199	0	0	0	AT1G70720	NA	AT1G70720	NA
AT5G14995	3.33208	-5.98452	2.36982	-2.52531	0.0115597	0.0358988	5.93385	0	31.6144	0	0	0	AT5G14995	NA	AT5G14995	Encodes a ECA1 gametogenesis related family protein
AT5G43580	3.24346	-5.39942	1.7156	-3.14725	0.00164815	0.0071102	8.90078	3.8016	12.3709	0	0	0	AT5G43580	UPI	AT5G43580	Predicted to encode a PR (pathogenesis-related) peptide that belongs to the PR-6 proteinase inhibitor family. Six putative PR-6-type protein encoding genes are found in Arabidopsis: At2g38900, At2g38870, At5g43570, At5g43580, At3g50020 and At3g46860.
AT2G07674	3.1562	-5.1323	1.69955	-3.0198	0.00252945	0.0102358	11.8677	7.6032	1.37454	0	0	0	AT2G07674	NA	AT2G07674	NA
AT3G19615	9.57113	-5.04546	1.1414	-4.42043	9.8503e-06	8.50256e-05	45.9874	32.9472	26.1163	0	1.09691	1.98747	AT3G19615	NA	AT3G19615	NA
AT2G07656	2.49625	-5.0281	2.07543	-2.42268	0.0154065	0.045321	5.93385	3.8016	9.62178	0	0	0	AT2G07656	NA	AT2G07656	NA
AT5G15022	7.2567	-4.99976	1.3944	-3.58561	0.00033629	0.00184463	5.93385	10.1376	2.74908	0	0	0	AT5G15022	NA	AT5G15022	NA
AT3G52460	3.61407	-4.92066	1.69942	-2.8955	0.0037855	0.0142511	2.96693	1.2672	13.7454	0	0	0	AT3G52460	NA	AT3G52460	NA
AT4G10250	1421.46	-4.91871	0.214278	-22.9548	1.31914e-116	8.81319e-113	2780.01	3203.48	2760.08	125.069	111.885	53.6618	AT4G10250	ATHSP22.0	AT4G10250	Columbia endomembrane-localized small heat shock protein
AT1G35140	18.9925	-4.87725	1.33552	-3.65195	0.000260261	0.00147941	25.2189	3.8016	5.49816	0	1.09691	0	AT1G35140	EXL1, PHI-1	AT1G35140	At1g35140 (At1g35140/T32G9_32) mRNA, complete cds
AT1G09993	8.01099	-4.87454	1.3863	-3.51623	0.000437719	0.00232034	7.41732	13.9392	12.3709	0	0	0.993737	AT1G09993	NA	AT1G09993	NA
AT1G28850	3.13892	-4.83389	1.64852	-2.93226	0.00336509	0.0129035	8.90078	1.2672	6.8727	0	0	0	AT1G28850	NA	AT1G28850	NA
AT1G06407	4.50807	-4.82684	1.47265	-3.27764	0.00104678	0.00486112	10.3842	2.5344	4.12362	0	0	0	AT1G06407	NA	AT1G06407	NA
AT1G77093	2.37237	-4.81417	1.8993	-2.53471	0.0112541	0.0351239	8.90078	5.0688	2.74908	0	0	0	AT1G77093	NA	AT1G77093	Encodes a defensin-like (DEFL) family protein.
AT5G05525	1.9167	-4.7901	1.75181	-2.73437	0.00625004	0.0216355	5.93385	6.336	4.12362	0	0	0	AT5G05525	NA	AT5G05525	NA
AT1G10110	3.12585	-4.78297	1.60271	-2.98431	0.0028422	0.0112626	7.41732	8.8704	0	0	0	0	AT1G10110	AtFDB1	AT1G10110	NA
AT5G22890	4.50285	-4.77859	1.47235	-3.24555	0.00117222	0.00535678	4.45039	7.6032	4.12362	0	0	0	AT5G22890	STOP2	AT5G22890	NA
AT1G58684	35.3015	-4.75426	1.17049	-4.06176	4.87045e-05	0.000344698	8.90078	12.672	35.738	0	0	1.98747	AT1G58684	NA	AT1G58684	NA
AT2G46192	11.3186	-4.70313	1.31373	-3.57997	0.000343628	0.00187768	10.3842	11.4048	8.24724	0	1.09691	0	AT2G46192	NA	AT2G46192	NA
AT1G52270	4.27897	-4.65319	1.43563	-3.24122	0.00119018	0.00542895	4.45039	7.6032	2.74908	0	0	0	AT1G52270	NA	AT1G52270	NA
ATCG00200	2.36602	-4.64715	1.76682	-2.63024	0.00853251	0.0281047	4.45039	7.6032	2.74908	0	0	0	ATCG00200	NA	ATCG00200	NA
AT5G13887	3.46497	-4.55879	1.58365	-2.87866	0.00399367	0.0149366	11.8677	13.9392	1.37454	0	1.09691	0	AT5G13887	NA	AT5G13887	NA
AT3G46230	3179.46	-4.52797	0.218348	-20.7374	1.59156e-95	7.97492e-92	10369.4	7243.32	7033.52	433.192	358.689	277.253	AT3G46230	ATHSP17.4, HSP17.4	AT3G46230	member of the class I small heat-shock protein (sHSP) family, which accounts for the majority of sHSPs in maturing seeds
AT3G29030	3.98482	-4.44344	1.77865	-2.4982	0.0124824	0.038278	11.8677	5.0688	8.24724	0	1.09691	0	AT3G29030	ATEXP5, ATEXPA5, ATHEXP, EXP5, EXPA5	AT3G29030	Encodes an expansin. Naming convention from the Expansin Working Group (Kende et al, 2004. Plant Mol Bio)
AT5G40800	4.34487	-4.31677	1.43715	-3.00371	0.00266711	0.0107106	20.7685	11.4048	10.9963	0	2.19382	0	AT5G40800	AITR4, DIL3	AT5G40800	NA
AT1G02400	50.7485	-4.31042	1.14459	-3.76589	0.000165954	0.000999162	234.387	131.789	162.196	0	18.6474	7.9499	AT1G02400	ATGA2OX4, ATGA2OX6, DTA1, GA2OX6	AT1G02400	Encodes a gibberellin 2-oxidase that acts on C19 gibberellins but not C20 gibberellins.
AT3G50770	16.1519	-4.3074	1.29025	-3.33842	0.00084255	0.00405651	13.3512	16.4736	12.3709	0	1.09691	0.993737	AT3G50770	CML41	AT3G50770	NA
AT3G45110	10.3699	-4.29718	0.976568	-4.40029	1.08108e-05	9.26776e-05	40.0535	12.672	30.2399	0	0	3.97495	AT3G45110	NA	AT3G45110	NA
AT2G05350	3.41346	-4.21825	1.48916	-2.83264	0.00461657	0.0168512	5.93385	3.8016	1.37454	0	0	0	AT2G05350	NA	AT2G05350	NA
AT3G01202	2.21477	-4.21244	1.68758	-2.49615	0.012555	0.0384417	2.96693	2.5344	5.49816	0	0	0	AT3G01202	NA	AT3G01202	NA
AT2G05495	2.83705	-4.20259	1.64491	-2.55491	0.0106217	0.0335155	2.96693	3.8016	4.12362	0	0	0	AT2G05495	NA	AT2G05495	NA
AT4G25200	3549.29	-4.12602	0.158716	-25.9963	5.45969e-149	1.09429e-144	8473.54	8120.22	7225.96	501.412	514.45	349.795	AT4G25200	ATHSP23.6-MITO, HSP23.6-MITO	AT4G25200	AtHSP23.6-mito mRNA, nuclear gene encoding mitochondrial
AT1G65500	13.7417	-4.07474	1.13548	-3.58855	0.000332519	0.00182594	19.285	2.5344	32.989	0	3.29072	0	AT1G65500	STMP6	AT1G65500	NA
AT4G08165	6.3347	-4.03768	1.41878	-2.84588	0.00442888	0.0162758	1.48346	6.336	10.9963	0	1.09691	0	AT4G08165	NA	AT4G08165	NA
AT2G06225	4.32839	-4.02984	1.61871	-2.48954	0.0127908	0.0390088	1.48346	0	8.24724	0	0	0	AT2G06225	NA	AT2G06225	NA
AT5G05960	3.77926	-4.01792	1.49256	-2.69196	0.00710327	0.0241798	4.45039	3.8016	1.37454	0	0	0	AT5G05960	NA	AT5G05960	NA
AT5G12020	707.346	-4.01759	0.225127	-17.8459	3.11135e-71	8.90868e-68	2085.75	2829.66	2254.25	191.014	165.633	87.4489	AT5G12020	HSP17.6II	AT5G12020	NA
AT3G13520	26.79	-4.00518	1.42907	-2.80264	0.00506862	0.0182029	2.96693	5.0688	1.37454	0	0	0	AT3G13520	AGP12, ATAGP12	AT3G13520	Encodes a GPI-anchored arabinogalactan (AG) peptide with a short 'classical' backbone of 10 amino acids, seven of which are conserved among the 4 other Arabidopsis AG peptides. These peptides may be involved in cell signaling.
AT3G12960	2319.62	-3.9794	0.265709	-14.9765	1.04566e-50	1.16434e-47	7445.5	4656.96	5084.42	369.521	433.279	287.19	AT3G12960	SMP1	AT3G12960	NA
AT4G14504	5.4336	-3.94927	1.2827	-3.07887	0.00207788	0.00862612	17.8016	6.336	9.62178	2.27398	0	0	AT4G14504	NA	AT4G14504	NA
AT2G43520	60.5241	-3.94478	0.518344	-7.61035	2.73362e-14	1.33961e-12	201.751	88.704	107.214	9.0959	8.77527	7.9499	AT2G43520	ATTI2, TI2	AT2G43520	Encodes putative trypsin inhibitor protein which may function in defense against herbivory. Member of the defensin-like (DEFL) family.
AT1G71370	8.8036	-3.94142	1.0745	-3.66813	0.000244333	0.00140159	13.3512	24.0768	10.9963	0	0	2.98121	AT1G71370	NA	AT1G71370	NA
AT1G02980	5.15326	-3.92724	1.25644	-3.12568	0.00177394	0.00756007	11.8677	16.4736	20.6181	1.13699	1.09691	0.993737	AT1G02980	ATCUL2, CUL2	AT1G02980	encodes an Arabidopsis cullin
AT3G22560	10.1283	-3.91426	0.815791	-4.79812	1.60161e-06	1.68953e-05	26.7023	41.8176	28.8653	2.27398	3.29072	0.993737	AT3G22560	NA	AT3G22560	NA
AT5G46780	4.75292	-3.85818	1.45869	-2.64496	0.00816996	0.0270996	10.3842	3.8016	2.74908	0	1.09691	0	AT5G46780	NA	AT5G46780	NA
AT5G07285	8.3037	-3.79004	1.40211	-2.70311	0.0068695	0.0235078	1.48346	2.5344	4.12362	0	0	0	AT5G07285	NA	AT5G07285	NA
AT5G66564	11.0794	-3.78935	1.40867	-2.69003	0.00714462	0.0242958	2.96693	3.8016	1.37454	0	0	0	AT5G66564	NA	AT5G66564	NA
AT4G06315	8.96083	-3.69345	1.40881	-2.62169	0.0087495	0.0286359	0	3.8016	10.9963	0	0	0.993737	AT4G06315	NA	AT4G06315	NA
AT2G38240	21.334	-3.68124	0.729868	-5.04371	4.56594e-07	5.54301e-06	117.194	35.4816	38.4871	0	8.77527	5.96242	AT2G38240	JAO4, JOX4	AT2G38240	NA
AT5G50700	1184.21	-3.65033	0.961204	-3.79766	0.000146066	0.00089529	5896.77	2970.32	3155.94	677.645	241.32	38.7557	AT5G50700	HSD1	AT5G50700	Encodes a hydroxysteroid dehydrogenase HSD1. Two copies of HSD1 (At5g50600 and At5g50700) exist in the Arabidopsis genome as a result of an exact 33-kb duplication on chromosome 5 encompassing seven genes. There are five homologs of HSD1 in Arabidopsis (HSD2-At3g47350, HSD3-At3g47360, HSD4-At5g50590, HSD4-At5g50690 and HSD6-At5g50770; HSD4 has two copies due to the same gene duplication event occ…
AT3G24420	99.1147	-3.5802	0.896419	-3.99389	6.49982e-05	0.000442213	16.3181	6.336	16.4945	0	3.29072	0	AT3G24420	DLK2	AT3G24420	NA
ATCG00030	7.01105	-3.55034	1.0132	-3.50408	0.000458195	0.00240598	20.7685	20.2752	9.62178	3.41096	0	0.993737	ATCG00030	NA	ATCG00030	NA
AT2G01021	82.3728	-3.47007	0.542047	-6.40179	1.53566e-10	3.97153e-09	149.83	348.48	145.701	21.6028	19.7443	16.8935	AT2G01021	NA	AT2G01021	NA
AT4G32208	5.28836	-3.45604	1.30778	-2.64267	0.00822539	0.0272363	11.8677	8.8704	2.74908	0	1.09691	0.993737	AT4G32208	NA	AT4G32208	NA
AT5G24660	160.943	-3.44946	0.443074	-7.78531	6.9544e-15	3.76722e-13	90.4913	149.53	120.96	1.13699	20.8413	10.9311	AT5G24660	LSU2	AT5G24660	NA
AT4G09170	14.5617	-3.44607	1.16687	-2.95326	0.00314437	0.0122287	7.41732	6.336	9.62178	0	1.09691	0.993737	AT4G09170	NA	AT4G09170	NA
AT1G45240	6.07065	-3.4365	1.41667	-2.42576	0.0152764	0.0450272	5.93385	1.2672	5.49816	0	1.09691	0	AT1G45240	NA	AT1G45240	NA
AT1G03070	77.5297	-3.43343	0.31587	-10.8697	1.60654e-27	3.78823e-25	249.222	261.043	270.784	21.6028	36.198	14.9061	AT1G03070	AtLFG4, LFG4	AT1G03070	NA
AT4G24000	61.8749	-3.38955	0.437736	-7.74337	9.68174e-15	5.14725e-13	235.871	136.858	186.937	5.68494	29.6165	17.8873	AT4G24000	ATCSLG2, CSLG2	AT4G24000	encodes a protein similar to cellulose synthase
AT1G07313	9.54169	-3.37493	1.26768	-2.66228	0.00776127	0.0260045	5.93385	5.0688	10.9963	0	0	1.98747	AT1G07313	NA	AT1G07313	NA
AT2G29500	1799.36	-3.35032	0.137369	-24.3893	2.22302e-131	2.2278e-127	5159.49	4715.25	4376.54	549.165	467.283	382.589	AT2G29500	HSP17.6B	AT2G29500	NA
AT1G30190	92.1452	-3.30451	0.583146	-5.66669	1.45583e-08	2.53733e-07	342.68	243.303	327.14	31.8357	55.9423	4.96869	AT1G30190	NA	AT1G30190	NA
ATCG01210	8.50187	-3.23816	0.877377	-3.69073	0.000223608	0.00130284	17.8016	30.4128	12.3709	2.27398	2.19382	1.98747	ATCG01210	NA	ATCG01210	NA
AT1G78130	9.41828	-3.20271	0.908899	-3.52373	0.000425518	0.00226224	11.8677	25.344	12.3709	1.13699	4.38763	0	AT1G78130	UNE2	AT1G78130	NA
AT2G37810	117.116	-3.19709	0.388072	-8.23838	1.74559e-16	1.17013e-14	476.192	231.898	336.762	39.7946	51.5547	22.856	AT2G37810	NA	AT2G37810	NA
AT3G49300	138.265	-3.18819	0.30463	-10.4658	1.24025e-25	2.46122e-23	485.093	357.351	387.62	55.7124	42.7794	36.7683	AT3G49300	NA	AT3G49300	NA
AT4G18050	48.4545	-3.15066	0.420126	-7.49933	6.41428e-14	2.96909e-12	124.611	112.781	97.5923	18.1918	8.77527	10.9311	AT4G18050	ABCB9, PGP9	AT4G18050	NA
AT2G41260	48766.6	-3.14704	0.196604	-16.007	1.14185e-57	2.28861e-54	97902.7	109824	113786	9994.12	15356.7	10944	AT2G41260	ATM17, M17	AT2G41260	Late-embryogenesis-abundant gene. Involved in the acquisition of desiccation tolerance during late phase of embryogenesis.
AT5G51440	267.481	-3.01461	0.219221	-13.7515	4.99156e-43	3.44986e-40	407.952	349.747	302.399	30.6987	42.7794	56.643	AT5G51440	HSP23.5	AT5G51440	NA
ATMG01275	5.46965	-3.01277	1.03658	-2.90646	0.00365546	0.0138343	11.8677	20.2752	10.9963	2.27398	1.09691	1.98747	ATMG01275	NAD1, NAD1A, ND1	ATMG01275	Encodes subunit of mitochondrial NAD(P)H dehydrogenase that is trans-spliced from three precursors, NAD1A, NAD1B, and NAD1C.
AT2G29420	118.547	-3.00343	0.259137	-11.5901	4.62427e-31	1.40431e-28	167.631	216.691	192.436	34.1096	16.4536	21.8622	AT2G29420	ATGSTU7, GST25, GSTU7	AT2G29420	Encodes glutathione transferase belonging to the tau class of GSTs. Naming convention according to Wagner et al. (2002). Induced by Salicylic acid. Independent of NPR1 for their induction by salicylic acid.
AT1G51340	41.7807	-2.94895	0.413696	-7.12829	1.01624e-12	3.96275e-11	112.743	107.712	81.0979	18.1918	15.3567	5.96242	AT1G51340	MATE	AT1G51340	NA
AT5G57640	15.6142	-2.94854	1.17053	-2.51897	0.0117697	0.0364552	8.90078	1.2672	6.8727	2.27398	0	0	AT5G57640	NA	AT5G57640	NA
ATCG00330	13.9108	-2.94662	0.781506	-3.77044	0.000162958	0.000984376	25.2189	48.1536	26.1163	6.82193	2.19382	3.97495	ATCG00330	RPS14	ATCG00330	30S chloroplast ribosomal protein S14
AT4G29770	34.6309	-2.94475	0.551026	-5.34413	9.08518e-08	1.31666e-06	44.5039	32.9472	31.6144	10.2329	4.38763	0	AT4G29770	HTT1	AT4G29770	Target of trans acting-siR480/255.
AT1G71200	33.5058	-2.93536	0.539598	-5.43991	5.3308e-08	8.16235e-07	90.4913	107.712	78.3488	17.0548	17.5505	1.98747	AT1G71200	bHLH160, CITF1	AT1G71200	NA
AT5G38160	20.0913	-2.91788	0.724338	-4.02834	5.61723e-05	0.000390924	50.4378	11.4048	52.2325	3.41096	7.67836	3.97495	AT5G38160	NA	AT5G38160	NA
AT1G61566	5.31427	-2.88722	1.06166	-2.71953	0.00653757	0.0225297	16.3181	7.6032	31.6144	3.41096	1.09691	2.98121	AT1G61566	RALFL9	AT1G61566	Member of a diversely expressed predicted peptide family showing sequence similarity to tobacco Rapid Alkalinization Factor (RALF), and is believed to play an essential role in the physiology of Arabidopsis. Consists of a single exon and is characterized by a conserved C-terminal motif and N-terminal signal peptide.
AT3G49780	26.0493	-2.86356	0.728155	-3.93262	8.40242e-05	0.00055162	25.2189	26.6112	56.3561	0	8.77527	5.96242	AT3G49780	ATPSK3, ATPSK4, PSK4	AT3G49780	Phytosulfokine 3 precursor, coding for a unique plant peptide growth factor. Plants overexpressing this gene (under a 35S promoter), develop normal cotyledons and hypocotyls but their growth, in particular that of their roots, was faster than that of wildtype.
AT5G46295	29.0389	-2.86348	0.500114	-5.72566	1.03032e-08	1.87904e-07	68.2393	40.5504	39.8617	2.27398	12.066	5.96242	AT5G46295	NA	AT5G46295	NA
AT3G47342	18.0443	-2.84609	0.809817	-3.51449	0.000440603	0.00233316	11.8677	7.6032	19.2436	2.27398	1.09691	1.98747	AT3G47342	NA	AT3G47342	NA
AT3G20220	4.34929	-2.81883	1.15077	-2.44952	0.0143049	0.0427418	13.3512	7.6032	24.7417	3.41096	1.09691	1.98747	AT3G20220	SAUR47	AT3G20220	NA
AT4G15760	13.1187	-2.81402	1.04064	-2.70413	0.00684833	0.0234554	20.7685	20.2752	41.2362	0	7.67836	3.97495	AT4G15760	MO1	AT4G15760	Encodes a protein with similarity to monooxygenases that are known to degrade salicylic acid (SA).
AT2G31141	106.082	-2.79648	0.332377	-8.41356	3.9775e-17	2.94173e-15	221.036	178.675	105.84	20.4658	25.2289	26.8309	AT2G31141	NA	AT2G31141	NA
AT1G30100	66.4628	-2.78609	0.379006	-7.35105	1.96649e-13	8.43991e-12	209.168	100.109	107.214	19.3288	24.132	16.8935	AT1G30100	ATNCED5, NCED5	AT1G30100	Encodes 9-cis-epoxycarotenoid dioxygenase, a key enzyme in the biosynthesis of abscisic acid. The expression of this gene increases during the first 6h of imbibition.
AT5G50600	1513.76	-2.7851	0.439977	-6.33012	2.44976e-10	6.06928e-09	7039.03	3238.96	4193.72	1015.33	722.862	361.72	AT5G50600	ATHSD1, HSD1	AT5G50600	Encodes a hydroxysteroid dehydrogenase HSD1. Two copies of HSD1 (At5g50600 and At5g50700) exist in the Arabidopsis genome as a result of an exact 33-kb duplication on chromosome 5 encompassing seven genes. There are five homologs of HSD1 in Arabidopsis (HSD2-At3g47350, HSD3-At3g47360, HSD4-At5g50590, HSD4-At5g50690 and HSD6-At5g50770; HSD4 has two copies due to the same gene duplication event occ…
AT4G25110	3.65582	-2.77994	1.11031	-2.50374	0.0122887	0.0377705	11.8677	8.8704	8.24724	0	1.09691	2.98121	AT4G25110	AtMC2, AtMCP1c, MC2, MCP1c	AT4G25110	NA
AT5G55135	2021.51	-2.7688	0.230928	-11.9899	4.01444e-33	1.54734e-30	7108.76	5134.7	5577.88	1123.34	864.364	628.042	AT5G55135	NA	AT5G55135	NA
AT1G22380	53.1247	-2.765	0.35042	-7.89052	3.00933e-15	1.73322e-13	209.168	110.246	136.079	28.4247	20.8413	17.8873	AT1G22380	AtUGT85A3, UGT85A3	AT1G22380	Encodes a putative UDP-glucosyl transferase. At1g22380 was initially identified as encoding the protein AAF87154, which has been classified as a bHLH protein (AtbHLH152). Subsequently it has been found that the AAF87154 protein appears to be encoded by the AT1G23970 genomic locus.
AT2G38500	7.58486	-2.75504	1.01899	-2.70371	0.0068571	0.0234774	16.3181	17.7408	31.6144	0	8.77527	0.993737	AT2G38500	NA	AT2G38500	NA
AT4G23493	277.333	-2.74972	0.300121	-9.16205	5.09207e-20	5.67002e-18	759.533	643.738	724.383	171.685	91.0434	54.6555	AT4G23493	NA	AT4G23493	NA
AT2G01280	127.194	-2.68661	0.423946	-6.33716	2.34037e-10	5.82709e-09	267.023	324.403	292.777	40.9316	78.9774	17.8873	AT2G01280	BRF3, MEE65	AT2G01280	NA
AT5G08460	6.37907	-2.65174	0.950705	-2.78923	0.00528331	0.0188826	14.8346	10.1376	8.24724	0	1.09691	3.97495	AT5G08460	NA	AT5G08460	NA
AT2G45570	273.853	-2.64871	0.214312	-12.3591	4.34885e-35	2.07533e-32	974.636	733.709	937.436	114.836	191.959	115.273	AT2G45570	CYP76C2	AT2G45570	member of CYP76C
AT5G09530	6.00266	-2.63274	1.10424	-2.38422	0.0171156	0.049402	25.2189	5.0688	2.74908	0	2.19382	2.98121	AT5G09530	PELPK1, PRP10	AT5G09530	NA
AT5G54740	99575.7	-2.63203	0.370287	-7.10809	1.17659e-12	4.5177e-11	320799	268361	248331	62576.4	40459.5	32065.9	AT5G54740	SESA5	AT5G54740	NA
AT4G37420	510.83	-2.62796	0.220695	-11.9077	1.07945e-32	3.86346e-30	1895.87	1329.29	1738.79	338.822	287.39	177.879	AT4G37420	NA	AT4G37420	NA
AT3G08240	17.9464	-2.61784	0.748769	-3.49619	0.00047196	0.00246791	11.8677	25.344	8.24724	0	4.38763	2.98121	AT3G08240	NA	AT3G08240	NA
AT1G04423	6.59269	-2.61129	1.05205	-2.48209	0.0130614	0.0397095	2.96693	6.336	16.4945	1.13699	0	2.98121	AT1G04423	NA	AT1G04423	NA
AT1G09665	38.4735	-2.60602	0.379916	-6.85947	6.91182e-12	2.3283e-10	127.578	83.6352	116.836	18.1918	20.8413	14.9061	AT1G09665	NA	AT1G09665	NA
AT5G03210	254.542	-2.59765	0.323716	-8.02448	1.01953e-15	6.26824e-14	1033.97	533.491	758.746	159.178	160.149	65.5866	AT5G03210	AtDIP2, DIP2	AT5G03210	NA
AT5G54020	6.44487	-2.57523	1.04867	-2.45571	0.0140608	0.0421318	4.45039	13.9392	6.8727	2.27398	0	1.98747	AT5G54020	NA	AT5G54020	NA
AT4G18350	26.088	-2.56557	0.417605	-6.14353	8.0708e-10	1.83613e-08	87.5244	57.024	72.8506	13.6439	14.2598	8.94363	AT4G18350	ATNCED2, NCED2	AT4G18350	Encodes 9-<i>cis</i>-epoxycarotenoid dioxygenase, a key enzyme in the biosynthesis of abscisic acid. The expression of this gene declines during the first 12h of imbibition.
AT3G57690	19.4311	-2.55041	0.875769	-2.9122	0.00358897	0.0136238	28.1858	19.008	147.076	13.6439	6.58145	12.9186	AT3G57690	AGP23, ATAGP23	AT3G57690	Encodes a putative arabinogalactan-protein (AGP23).
AT1G55440	23.7848	-2.54426	0.473497	-5.37334	7.72922e-08	1.13575e-06	103.842	72.2304	50.858	15.9178	13.1629	9.93737	AT1G55440	NA	AT1G55440	NA
AT5G38170	7.95011	-2.51495	0.965998	-2.60347	0.00922858	0.0299157	8.90078	13.9392	20.6181	1.13699	6.58145	0	AT5G38170	NA	AT5G38170	NA
AT4G22105	28.4736	-2.51335	0.552636	-4.54793	5.41762e-06	5.03876e-05	90.4913	41.8176	49.4834	15.9178	14.2598	1.98747	AT4G22105	SCRL26	AT4G22105	Encodes a member of a family of small, secreted, cysteine rich proteins with sequence similarity to SCR (S locus cysteine-rich protein).
AT4G39360	17.9509	-2.50686	0.517836	-4.84102	1.29174e-06	1.3927e-05	62.3055	58.2912	54.9816	6.82193	10.9691	12.9186	AT4G39360	NA	AT4G39360	NA
AT2G07605	12.8803	-2.50265	0.960918	-2.60443	0.00920265	0.0298588	0	11.4048	12.3709	0	2.19382	1.98747	AT2G07605	NA	AT2G07605	NA
AT3G22840	537.743	-2.4959	0.508106	-4.91217	9.00762e-07	1.01467e-05	1220.89	870.567	643.285	167.137	165.633	152.042	AT3G22840	ELIP, ELIP1	AT3G22840	Encodes an early light-inducible protein.
AT2G01422	21.4443	-2.49192	0.704517	-3.53706	0.000404601	0.00216772	22.252	43.0848	30.2399	0	10.9691	5.96242	AT2G01422	NA	AT2G01422	NA
AT4G32860	10.2358	-2.48346	0.694047	-3.57822	0.000345937	0.00188876	14.8346	17.7408	15.1199	2.27398	2.19382	3.97495	AT4G32860	NA	AT4G32860	NA
AT2G21820	12087.9	-2.47879	0.164802	-15.041	3.95395e-51	4.6617e-48	35705.5	31194.7	32393.8	5985.1	5608.49	6218.81	AT2G21820	NA	AT2G21820	NA
ATCG00920	7.32521	-2.45837	0.887434	-2.7702	0.00560215	0.0197826	7.41732	29.1456	16.4945	5.68494	1.09691	2.98121	ATCG00920	NA	ATCG00920	NA
AT2G07695	10.492	-2.44229	0.709161	-3.44391	0.000573373	0.00293241	16.3181	22.8096	24.7417	5.68494	1.09691	4.96869	AT2G07695	NA	AT2G07695	NA
AT2G38870	3896.93	-2.43912	0.233255	-10.4569	1.36288e-25	2.67544e-23	10522.2	10007.1	9689.13	2029.52	2291.44	1252.11	AT2G38870	NA	AT2G38870	Predicted to encode a PR (pathogenesis-related) peptide that belongs to the PR-6 proteinase inhibitor family. Six putative PR-6-type protein encoding genes are found in Arabidopsis: At2g38900, At2g38870, At5g43570, At5g43580, At3g50020 and At3g46860.
AT1G68460	55.4848	-2.43203	0.316534	-7.68333	1.55011e-14	7.9174e-13	112.743	101.376	82.4724	25.0137	15.3567	14.9061	AT1G68460	ATIPT1, IPT1	AT1G68460	Encodes a putative adenylate isopentenyltransferase. It catalyzes the formation of isopentenyladenosine 5'-monophosphate (iPMP) from AMP and dimethylallylpyrophosphate (DMAPP), but it has a lower Km for ADP and likely works using ADP or ATP in plants. It is involved in cytokinin biosynthesis.
AT1G64210	21.6405	-2.42351	0.745876	-3.24921	0.00115724	0.00530161	2.96693	22.8096	13.7454	2.27398	2.19382	2.98121	AT1G64210	NA	AT1G64210	NA
AT2G42000	6777.72	-2.40998	0.217196	-11.0958	1.31415e-28	3.55938e-26	22134.8	16757.5	17367.3	4113.62	3959.84	2513.16	AT2G42000	AtMT4a	AT2G42000	NA
AT1G73010	32.7075	-2.40367	0.51714	-4.64801	3.35156e-06	3.26411e-05	152.797	58.2912	61.8543	12.5069	23.0351	15.8998	AT1G73010	AtPPsPase1, ATPS2, PPsPase1, PS2	AT1G73010	NA
AT1G28840	6.78948	-2.40189	0.914286	-2.62707	0.00861243	0.0283006	5.93385	12.672	9.62178	1.13699	3.29072	0.993737	AT1G28840	NA	AT1G28840	NA
AT1G52560	2919.38	-2.39627	0.193792	-12.3652	4.03334e-35	1.97171e-32	8255.47	7221.78	6806.72	1779.39	1517.02	938.088	AT1G52560	HSP26.5	AT1G52560	NA
AT5G63790	1461.18	-2.38995	0.191661	-12.4697	1.09224e-35	5.761e-33	3978.65	3647	4177.23	745.864	955.407	551.524	AT5G63790	ANAC102, NAC102	AT5G63790	Encodes a member of the NAC family of transcription factors. ANAC102 appears to have a role in mediating response to low oxygen stress (hypoxia) in germinating seedlings.
AT1G15960	46.4482	-2.38532	0.624654	-3.81862	0.0001342	0.000829411	295.209	45.6192	74.2252	35.2466	26.3258	17.8873	AT1G15960	ATNRAMP6, NRAMP6	AT1G15960	member of Nramp2 family
AT5G46050	409.953	-2.38158	0.278295	-8.55773	1.15116e-17	9.25279e-16	1134.85	837.62	969.051	223.987	248.998	92.4175	AT5G46050	AtNPF5.2, ATPTR3, NPF5.2, PTR3	AT5G46050	Encodes a di- and tri-peptide transporter involved in responses to wounding, virulent bacterial pathogens, and high NaCl concentrations. The protein is predicted to have 12 transmembrane helicies.
AT3G09085	26.6173	-2.362	0.480855	-4.91209	9.01119e-07	1.01467e-05	48.9543	48.1536	41.2362	12.5069	6.58145	7.9499	AT3G09085	NA	AT3G09085	NA
AT2G46240	1007.54	-2.35556	0.149532	-15.7529	6.55861e-56	9.38959e-53	2719.19	2408.95	2064.56	485.494	511.159	409.42	AT2G46240	ATBAG6, BAG6	AT2G46240	A member of Arabidopsis BAG (Bcl-2-associated athanogene) proteins, plant homologs of mammalian regulators of apoptosis. Expression of BAG6 in leaves was strongly induced by heat stress. Knockout mutants exhibited enhanced susceptibility to fungal pathogen Botrytis cinerea. Plant BAG proteins are multi-functional and remarkably similar to their animal counterparts, as they regulate apoptotic-like…
AT2G22088	11.9082	-2.35499	0.931368	-2.52853	0.0114543	0.0356266	7.41732	8.8704	5.49816	0	2.19382	1.98747	AT2G22088	NA	AT2G22088	NA
AT5G59340	598.045	-2.34889	0.248976	-9.43424	3.93849e-21	5.12591e-19	1517.58	902.247	1487.25	204.658	276.421	285.203	AT5G59340	WOX2	AT5G59340	Encodes a WUSCHEL-related homeobox gene family member with 65 amino acids in its homeodomain. Proteins in this family contain a sequence of eight residues (TLPLFPMH) downstream of the homeodomain called the WUS box. WOX2 has a putative Zinc finger domain downstream of the homeodomain. Transcripts are expressed in the egg cell, the zygote and the apical cell lineage and are reduced in met3-1 early…
AT1G44414	92.4453	-2.34778	0.256156	-9.16546	4.93354e-20	5.52419e-18	198.784	201.485	232.297	56.8494	38.3918	29.8121	AT1G44414	NA	AT1G44414	NA
AT1G07540	30.7203	-2.34768	0.390594	-6.01054	1.84903e-09	3.95807e-08	75.6566	95.04	86.596	15.9178	21.9382	12.9186	AT1G07540	TRFL2	AT1G07540	Arabidopsis thaliana telomere-binding protein, putative (At1g07540)
AT4G32870	37.2462	-2.3449	0.649976	-3.60767	0.000308956	0.00171677	124.611	110.246	93.4687	6.82193	31.8103	25.8372	AT4G32870	NA	AT4G32870	NA
AT5G53990	79.1267	-2.33188	0.342877	-6.80093	1.03945e-11	3.37661e-10	269.99	202.752	218.552	64.8083	48.264	24.8434	AT5G53990	NA	AT5G53990	NA
AT5G59220	228.438	-2.32671	0.308702	-7.5371	4.80552e-14	2.26628e-12	780.302	676.685	702.39	168.274	185.377	77.5115	AT5G59220	HAI1, SAG113	AT5G59220	NA
AT2G01660	10.9887	-2.32633	0.718535	-3.2376	0.00120538	0.0054833	19.285	11.4048	17.869	4.54795	1.09691	3.97495	AT2G01660	PDLP6	AT2G01660	Encodes a plasmodesmal protein that may be involved in the intercellular movement of molecules through the plasmodesmata. The protein has two DUF26 domains and a single transmembrane domain.
AT3G24542	12.1513	-2.32308	0.849212	-2.73557	0.00622728	0.0215642	8.90078	19.008	4.12362	4.54795	0	1.98747	AT3G24542	NA	AT3G24542	NA
AT2G40170	97764.2	-2.32101	0.179211	-12.9513	2.31053e-38	1.36205e-35	334613	274792	266930	66904.9	60730.3	47744.1	AT2G40170	ATEM6, EM6, GEA6	AT2G40170	Encodes a group 1 LEA gene that is activated by direct binding of ABI5 to its promoter and is involved in response to ABA. Is required for normal seed development. Involved in regulating the timing of dessication tolerance and rate of water loss during seed maturation.
AT1G05420	10.3264	-2.31463	0.675622	-3.42593	0.000612705	0.00310583	32.6362	36.7488	27.4908	7.95892	7.67836	3.97495	AT1G05420	ATOFP12, OFP12	AT1G05420	NA
AT4G05120	161.159	-2.31391	0.217882	-10.62	2.40582e-26	5.12977e-24	505.861	370.023	408.238	101.192	91.0434	66.5804	AT4G05120	ATENT3, ENT3, FUR1	AT4G05120	Encodes an equilibrative nucleoside transporter AtENT3. Mutations of this locus allow mutants to grow on uridine analogue fluorouridine.
AT4G39366	219.615	-2.29554	0.229572	-9.99922	1.53605e-23	2.54438e-21	146.863	117.85	158.072	37.5206	21.9382	26.8309	AT4G39366	NA	AT4G39366	NA
AT5G35580	54.6159	-2.29474	0.393343	-5.83394	5.41336e-09	1.04227e-07	167.631	116.582	134.705	29.5617	35.1011	20.8685	AT5G35580	PBL13	AT5G35580	NA
AT4G27140	7341.44	-2.2907	0.238699	-9.59661	8.26146e-22	1.14196e-19	20841.2	13811.2	17459.4	2105.7	3676.84	4866.33	AT4G27140	AT2S1, SESA1	AT4G27140	NA
AT5G18430	23.863	-2.28724	0.609543	-3.75238	0.00017516	0.0010458	81.5905	41.8176	48.1089	17.0548	15.3567	2.98121	AT5G18430	NA	AT5G18430	NA
AT3G02495	6.22056	-2.28582	0.927688	-2.46399	0.0137399	0.0413311	13.3512	7.6032	10.9963	2.27398	4.38763	0	AT3G02495	NA	AT3G02495	NA
AT4G22755	156.743	-2.27337	0.309571	-7.3436	2.07925e-13	8.8669e-12	577.067	391.565	402.74	137.576	92.1403	54.6555	AT4G22755	NA	AT4G22755	NA
AT1G76680	118.695	-2.27041	0.379767	-5.97844	2.2529e-09	4.72331e-08	182.466	160.934	155.323	23.8767	53.7485	25.8372	AT1G76680	ATOPR1, OPR1	AT1G76680	Encodes a member of an alpha/beta barrel fold family of FMN-containing oxidoreductases. One of the closely related 12-oxophytodienoic acid reductases. This enzyme is not expected to participate in jasmonic acid biosynthesis because during in vitro assays, it shows very little activity with the naturally occurring OPDA isomer. Shows activity towards 2,4,6-trinitrotoluene. Expressed predominately i…
AT2G29490	47.6337	-2.25859	0.358681	-6.29693	3.03607e-10	7.37751e-09	63.7889	84.9024	87.9706	22.7398	13.1629	13.9123	AT2G29490	ATGSTU1, GST19, GSTU1	AT2G29490	Encodes glutathione transferase belonging to the tau class of GSTs. Naming convention according to Wagner et al. (2002).
AT2G28780	197.973	-2.25578	0.27867	-8.0948	5.73586e-16	3.6381e-14	628.989	430.848	530.572	97.781	145.889	89.4363	AT2G28780	NA	AT2G28780	NA
AT4G37070	90.1377	-2.25235	0.466712	-4.82599	1.39311e-06	1.49128e-05	175.049	264.845	202.057	47.7535	74.5898	12.9186	AT4G37070	AtPLAIVA, PLA, PLP1	AT4G37070	Patatin-related phospholipase A. Expressed strongly and exclusively in roots. AtplaIVA-null mutants have reduced lateral root development. Phosphorylation by calcium-dependent protein kinases in vitro enhances its activity.
AT3G22510	39.6512	-2.24876	0.456288	-4.92838	8.29135e-07	9.4155e-06	149.83	111.514	112.712	42.0686	24.132	12.9186	AT3G22510	NA	AT3G22510	NA
AT1G62180	744.772	-2.24874	0.117022	-19.2164	2.69725e-82	1.08122e-78	1616.98	1671.44	1734.67	350.192	393.79	314.021	AT1G62180	APR2, APSR, ATAPR2, PRH, PRH43	AT1G62180	encodes a adenosine 5'-phosphosulfate reductase, involved in sulfate assimilation. Is a major effect locus for natural variation of shoot sulfate content in Arabidopsis.
AT3G03965	40.8092	-2.23705	0.550257	-4.06546	4.7938e-05	0.000340426	28.1858	17.7408	20.6181	4.54795	8.77527	0.993737	AT3G03965	NA	AT3G03965	NA
AT1G72200	104.487	-2.23353	0.310585	-7.19137	6.41445e-13	2.58682e-11	412.403	286.387	292.777	63.6713	98.7217	48.6931	AT1G72200	ATL11	AT1G72200	NA
AT1G09427	6.64321	-2.2267	0.927569	-2.40057	0.0163693	0.0477153	7.41732	8.8704	8.24724	0	0	4.96869	AT1G09427	NA	AT1G09427	NA
AT1G69540	303.634	-2.20232	0.279061	-7.89189	2.97635e-15	1.71916e-13	1115.56	741.312	808.229	249	221.575	109.311	AT1G69540	AGL94	AT1G69540	Encodes a member of the MIKC (MADS box, Keratin binding domain, and C terminal domain containing )family of transcriptional regulators.
ATCG00950	23.1497	-2.19374	0.525219	-4.17682	2.95616e-05	0.000223333	34.1197	79.8336	42.6107	11.3699	12.066	10.9311	ATCG00950	NA	ATCG00950	NA
AT3G29575	289.155	-2.19335	0.306873	-7.14741	8.84293e-13	3.49584e-11	795.136	598.119	863.211	122.795	161.245	208.685	AT3G29575	AFP3	AT3G29575	NA
AT4G15258	31.9077	-2.19264	0.653819	-3.35359	0.00079771	0.00387788	17.8016	7.6032	23.3672	0	3.29072	6.95616	AT4G15258	NA	AT4G15258	NA
AT3G21352	19.6584	-2.19219	0.593711	-3.69236	0.000222182	0.00129604	37.0866	48.1536	59.1052	4.54795	9.87217	16.8935	AT3G21352	NA	AT3G21352	NA
AT5G39715	6.9957	-2.18488	0.832579	-2.62423	0.00868452	0.0284837	29.6693	17.7408	16.4945	3.41096	7.67836	2.98121	AT5G39715	NA	AT5G39715	NA
ATCG00160	21.4321	-2.17409	0.685165	-3.17309	0.00150823	0.00660467	31.1527	53.2224	12.3709	5.68494	9.87217	5.96242	ATCG00160	RPS2	ATCG00160	Chloroplast ribosomal protein S2
AT1G19610	53.2135	-2.17272	0.386943	-5.61509	1.96464e-08	3.34556e-07	108.293	69.696	79.7233	13.6439	29.6165	13.9123	AT1G19610	LCR78, PDF1.4	AT1G19610	Predicted to encode a PR (pathogenesis-related) protein. Belongs to the plant defensin (PDF) family with the following members: At1g75830/PDF1.1, At5g44420/PDF1.2a, At2g26020/PDF1.2b, At5g44430/PDF1.2c, At2g26010/PDF1.3, At1g19610/PDF1.4, At1g55010/PDF1.5, At2g02120/PDF2.1, At2g02100/PDF2.2, At2g02130/PDF2.3, At1g61070/PDF2.4, At5g63660/PDF2.5, At2g02140/PDF2.6, At5g38330/PDF3.1 and At4g30070/PDF…
AT3G22800	15.3812	-2.16764	0.531296	-4.07991	4.50531e-05	0.000322961	41.537	49.4208	35.738	14.7808	8.77527	4.96869	AT3G22800	NA	AT3G22800	NA
AT5G51990	21.0446	-2.163	0.526903	-4.10513	4.04092e-05	0.00029441	59.3385	60.8256	83.8469	14.7808	7.67836	22.856	AT5G51990	CBF4, DREB1D	AT5G51990	encodes a member of the DREB subfamily A-1 of ERF/AP2 transcription factor family (CBF4). The protein contains one AP2 domain. There are six members in this subfamily, including CBF1, CBF2, and CBF3. This gene is involved in response to drought stress and abscisic acid treatment, but not to low temperature.
AT1G09267	6.30025	-2.15881	0.876594	-2.46273	0.0137883	0.0414566	11.8677	12.672	8.24724	1.13699	0	5.96242	AT1G09267	NA	AT1G09267	NA
AT4G29020	972.307	-2.15559	0.151072	-14.2686	3.43251e-46	3.12717e-43	1962.62	1592.87	1518.87	378.617	389.402	370.664	AT4G29020	NA	AT4G29020	NA
AT1G02670	16.9587	-2.15236	0.569312	-3.78064	0.000156428	0.000951816	40.0535	35.4816	45.3598	12.5069	10.9691	3.97495	AT1G02670	NA	AT1G02670	NA
AT1G66760	105.795	-2.14855	0.752397	-2.8556	0.00429556	0.0158819	163.181	202.752	305.148	14.7808	32.9072	103.349	AT1G66760	NA	AT1G66760	NA
AT4G36620	877.261	-2.1459	0.247789	-8.66019	4.7097e-18	4.10419e-16	2975.83	2175.78	2549.77	752.686	674.599	314.021	AT4G36620	GATA19, HANL2	AT4G36620	Encodes a member of the GATA factor family of zinc finger transcription factors.
AT2G39200	13.6337	-2.14359	0.834558	-2.56853	0.010213	0.0325047	19.285	5.0688	9.62178	5.68494	1.09691	0.993737	AT2G39200	ATMLO12, MLO12	AT2G39200	A member of a large family of seven-transmembrane domain proteins specific to plants, homologs of the barley mildew resistance locus o (MLO) protein. The Arabidopsis genome contains 15 genes encoding MLO proteins, with localization in plasma membrane. Phylogenetic analysis revealed four clades of closely-related AtMLO genes. ATMLO6 belongs to the clade IV, with AtMLO2, AtMLO3 and AtMLO12. The gen…
AT4G39675	137.187	-2.1407	0.329229	-6.50216	7.91749e-11	2.16494e-09	388.667	221.76	306.522	70.4932	103.109	34.7808	AT4G39675	NA	AT4G39675	NA
AT3G22410	8.71624	-2.13948	0.884556	-2.4187	0.0155759	0.0457085	14.8346	12.672	24.7417	6.82193	1.09691	3.97495	AT3G22410	NA	AT3G22410	NA
AT4G06310	12.0292	-2.12592	0.841547	-2.52621	0.0115301	0.0358348	7.41732	6.336	9.62178	2.27398	0	2.98121	AT4G06310	NA	AT4G06310	NA
AT2G45970	36.2692	-2.12574	0.610305	-3.48308	0.000495685	0.00257584	43.0204	31.68	65.9779	6.82193	16.4536	8.94363	AT2G45970	CYP86A8, LCR	AT2G45970	Encodes a member of the CYP86A subfamily of cytochrome p450 genes. Expressed at moderate levels in flowers, leaves, roots and stems.
AT5G24160	556.348	-2.12457	0.218516	-9.72272	2.41259e-22	3.51115e-20	1642.19	1391.39	1624.71	415.001	427.794	226.572	AT5G24160	SQE6	AT5G24160	NA
ATCG00440	8.15487	-2.12363	0.817134	-2.59887	0.00935306	0.0302556	14.8346	16.4736	5.49816	0	3.29072	4.96869	ATCG00440	NDHC	ATCG00440	Encodes NADH dehydrogenase D3 subunit of the chloroplast NAD(P)H dehydrogenase complex
AT1G53540	2031.82	-2.11786	0.19881	-10.6527	1.69461e-26	3.69186e-24	5355.3	4663.3	4584.09	1462.17	1136.4	767.165	AT1G53540	HSP17.6C	AT1G53540	NA
AT4G37370	801.791	-2.11707	0.463441	-4.56816	4.92015e-06	4.62545e-05	2458.1	2569.88	2482.42	408.179	1021.22	302.096	AT4G37370	CYP81D8	AT4G37370	member of CYP81D
ATCG01120	10.8484	-2.11599	0.775538	-2.72842	0.00636381	0.0219914	16.3181	30.4128	12.3709	1.13699	4.38763	7.9499	ATCG01120	RPS15	ATCG01120	encodes a chloroplast ribosomal protein S15, a constituent of the small subunit of the ribosomal complex
AT1G49700	227.286	-2.10038	0.313115	-6.70801	1.97294e-11	6.02799e-10	363.449	272.448	243.294	87.5481	57.0392	60.618	AT1G49700	NA	AT1G49700	NA
AT3G49570	197.121	-2.09775	0.384486	-5.45599	4.87017e-08	7.52604e-07	111.26	145.728	74.2252	7.95892	20.8413	47.6994	AT3G49570	LSU3	AT3G49570	NA
AT3G54700	8.43544	-2.09191	0.695536	-3.00762	0.00263299	0.0105864	23.7354	27.8784	21.9926	6.82193	6.58145	3.97495	AT3G54700	PHT1;7	AT3G54700	Encodes Pht1;7, a member of the Pht1 family of phosphate transporters which include: Pht1;1/At5g43350, Pht1;2/At5g43370, Pht1;3/At5g43360, Pht1;4/At2g38940, Pht1;5/At2g32830, Pht1;6/At5g43340, Pht1;7/At3g54700, Pht1;8/At1g20860, Pht1;9/At1g76430 (Plant Journal 2002, 31:341).
AT5G48570	359.243	-2.08799	0.15172	-13.7621	4.30809e-43	3.08382e-40	611.187	688.09	545.692	147.808	155.761	131.173	AT5G48570	ATFKBP65, FKBP65, ROF2	AT5G48570	NA
AT3G47030	29.6751	-2.07922	0.541397	-3.84048	0.000122796	0.000768168	44.5039	41.8176	32.989	7.95892	17.5505	2.98121	AT3G47030	NA	AT3G47030	NA
AT3G22910	26.5617	-2.07527	0.580492	-3.57502	0.000350207	0.00190895	74.1732	30.4128	37.1126	10.2329	16.4536	6.95616	AT3G22910	ACA13	AT3G22910	NA
AT5G44910	50.3832	-2.06631	0.405355	-5.09754	3.4409e-07	4.28893e-06	123.127	138.125	87.9706	18.1918	37.2949	27.8246	AT5G44910	NA	AT5G44910	NA
AT4G18920	2157.2	-2.06527	0.166408	-12.4109	2.28203e-35	1.14347e-32	5865.61	5893.75	6309.14	1617.93	1670.59	1030.51	AT4G18920	NA	AT4G18920	NA
AT1G78020	11.825	-2.06484	0.759444	-2.71888	0.00655032	0.0225632	20.7685	5.0688	15.1199	2.27398	5.48454	1.98747	AT1G78020	FLZ6	AT1G78020	NA
AT4G04465	35.9384	-2.06314	0.698655	-2.95302	0.00314677	0.0122331	7.41732	13.9392	9.62178	1.13699	3.29072	2.98121	AT4G04465	NA	AT4G04465	NA
AT5G52640	12125.6	-2.03804	0.115844	-17.593	2.7891e-69	6.98773e-66	34288.8	33452.8	30024.1	9189.14	7876.9	6741.51	AT5G52640	ATHS83, AtHsp90-1, ATHSP90.1, HSP81-1, HSP81.1, HSP83, HSP90.1	AT5G52640	Encodes a cytosolic heat shock protein AtHSP90.1. AtHSP90.1 interacts with disease resistance signaling components SGT1b and RAR1 and is required for RPS2-mediated resistance.
AT1G64500	65.8139	-2.02805	0.293346	-6.91351	4.72807e-12	1.63106e-10	143.896	110.246	141.578	23.8767	30.7134	41.737	AT1G64500	NA	AT1G64500	NA
AT2G20723	17.8364	-2.02713	0.831914	-2.4367	0.0148218	0.0439328	8.90078	7.6032	5.49816	3.41096	1.09691	0.993737	AT2G20723	NA	AT2G20723	NA
AT1G67900	17.993	-2.02679	0.495716	-4.0886	4.3398e-05	0.000312662	45.9874	32.9472	39.8617	12.5069	8.77527	7.9499	AT1G67900	NA	AT1G67900	NA
AT2G34230	22.551	-2.02542	0.554189	-3.65474	0.000257444	0.00146548	19.285	16.4736	16.4945	2.27398	3.29072	6.95616	AT2G34230	NA	AT2G34230	NA
AT1G16030	21846.5	-2.02441	0.164157	-12.3322	6.07532e-35	2.76745e-32	66368.7	59401.3	54415.3	17831.4	15376.5	11084.1	AT1G16030	Hsp70b	AT1G16030	NA
AT3G59010	11.4992	-2.02243	0.642171	-3.14937	0.00163623	0.00706637	25.2189	21.5424	13.7454	1.13699	6.58145	6.95616	AT3G59010	PME35, PME61	AT3G59010	NA
AT4G01250	214.915	-2.02175	0.161437	-12.5235	5.55214e-36	3.00761e-33	413.886	363.687	399.991	118.247	93.2372	79.499	AT4G01250	AtWRKY22, WRKY22	AT4G01250	member of WRKY Transcription Factor; Group II-e
ATCG01080	15.0817	-2.01958	0.658562	-3.06665	0.00216475	0.00892759	20.7685	54.4896	20.6181	12.5069	4.38763	6.95616	ATCG01080	NDHG	ATCG01080	NADH dehydrogenase ND6
AT3G05325	16.8875	-2.01374	0.685354	-2.93825	0.00330071	0.0127126	11.8677	12.672	19.2436	3.41096	7.67836	0	AT3G05325	NA	AT3G05325	NA
AT3G61898	36.6188	-2.00797	0.841632	-2.3858	0.0170418	0.0492336	2.96693	7.6032	10.9963	5.68494	0	0	AT3G61898	NA	AT3G61898	NA
AT1G08997	12.5471	-2.00607	0.555432	-3.61174	0.000304153	0.00169337	25.2189	26.6112	24.7417	3.41096	4.38763	10.9311	AT1G08997	NA	AT1G08997	NA
AT1G74710	487.985	-1.98689	0.291764	-6.80991	9.76583e-12	3.20946e-10	1560.6	1326.76	1347.05	512.782	369.658	186.823	AT1G74710	ATICS1, EDS16, ICS1, SID2	AT1G74710	Encodes a protein with isochorismate synthase activity. Mutants fail to accumulate salicylic acid. Its function may be redundant with that of ICS2 (AT1G18870).
AT3G09545	92.2868	-1.98659	0.388114	-5.11858	3.07844e-07	3.87084e-06	313.011	204.019	307.897	117.11	54.8454	36.7683	AT3G09545	NA	AT3G09545	NA
AT5G01180	43.1246	-1.97577	0.348378	-5.67133	1.41691e-08	2.47811e-07	114.227	100.109	133.33	25.0137	41.6825	21.8622	AT5G01180	AtNPF8.2, ATPTR5, NPF8.2, PTR5	AT5G01180	Encodes a dipeptide transporter expressed in pollen and ovules during early seed development. GFP-tagged PTR5 localizes to the plasma membrane.
AT5G54165	188.551	-1.97474	0.316429	-6.24071	4.35585e-10	1.03197e-08	731.348	377.626	486.587	171.685	149.18	85.4614	AT5G54165	NA	AT5G54165	NA
AT1G26800	1097.33	-1.96459	0.123879	-15.8589	1.22059e-56	2.03869e-53	2938.74	2359.53	2793.07	715.165	727.25	631.023	AT1G26800	MPSR1, SNIPER2	AT1G26800	NA
AT1G07400	314.32	-1.96318	0.200037	-9.81408	9.79237e-23	1.49823e-20	970.185	715.968	725.757	247.863	195.25	175.891	AT1G07400	HSP17.8	AT1G07400	NA
AT3G15250	23.2808	-1.96204	0.518636	-3.78307	0.000154905	0.000943986	109.776	41.8176	67.3525	21.6028	18.6474	15.8998	AT3G15250	NA	AT3G15250	NA
AT1G27030	124.103	-1.95798	0.387692	-5.05037	4.40965e-07	5.37607e-06	277.408	114.048	166.319	72.7672	36.198	34.7808	AT1G27030	NA	AT1G27030	NA
AT1G14960	209.404	-1.94814	0.203152	-9.58955	8.84667e-22	1.20622e-19	649.757	542.362	569.06	163.726	183.184	110.305	AT1G14960	NA	AT1G14960	NA
AT3G28100	33.0454	-1.94131	0.427311	-4.54308	5.54377e-06	5.13702e-05	102.359	48.1536	53.6071	22.7398	17.5505	12.9186	AT3G28100	UMAMIT45	AT3G28100	NA
AT1G59124	6.90556	-1.94055	0.801602	-2.42084	0.0154848	0.0455209	13.3512	8.8704	10.9963	3.41096	3.29072	1.98747	AT1G59124	NA	AT1G59124	NA
AT2G05250	12.0537	-1.9382	0.624787	-3.10218	0.00192101	0.00807526	17.8016	10.1376	21.9926	5.68494	5.48454	1.98747	AT2G05250	NA	AT2G05250	NA
AT2G42350	12.123	-1.93337	0.595566	-3.24627	0.00116928	0.005347	45.9874	16.4736	24.7417	9.0959	8.77527	4.96869	AT2G42350	ATL40	AT2G42350	NA
AT3G05085	18.9765	-1.92856	0.585224	-3.29542	0.000982761	0.00459988	60.822	25.344	50.858	12.5069	18.6474	4.96869	AT3G05085	NA	AT3G05085	NA
AT5G12030	52819	-1.92767	0.162433	-11.8675	1.74579e-32	6.0329e-30	141967	125165	125190	41511.4	34481.3	27132	AT5G12030	AT-HSP17.6A, HSP17.6, HSP17.6A	AT5G12030	Encodes a cytosolic small heat shock protein with chaperone activity that is induced by heat and osmotic stress and is also expressed late in seed development.
AT4G12400	2911.69	-1.92655	0.142262	-13.5423	8.80453e-42	5.69256e-39	6801.68	6579.31	6222.54	2085.24	1722.15	1351.48	AT4G12400	Hop3	AT4G12400	NA
AT2G43540	539.558	-1.92368	0.158584	-12.1303	7.29664e-34	3.0468e-31	1066.61	1125.27	1070.77	351.329	279.712	230.547	AT2G43540	NA	AT2G43540	NA
AT1G02405	92.6108	-1.91854	0.295119	-6.5009	7.98429e-11	2.18023e-09	201.751	129.254	235.046	42.0686	66.9114	40.7432	AT1G02405	NA	AT1G02405	NA
AT3G23410	38.3011	-1.91848	0.713781	-2.68778	0.00719297	0.0244478	8.90078	16.4736	6.8727	1.13699	6.58145	0.993737	AT3G23410	ATFAO3, FAO3	AT3G23410	Encodes a fatty alcohol oxidase.
AT3G24500	326.239	-1.90454	0.162812	-11.6978	1.30873e-31	4.2308e-29	870.793	994.752	809.604	261.507	200.734	252.409	AT3G24500	ATMBF1C, MBF1C	AT3G24500	One of three genes in A. thaliana encoding multiprotein bridging factor 1, a highly conserved transcriptional coactivator. May serve as a bridging factor between a bZIP factor and TBP. Its expression is specifically elevated in response to pathogen infection, salinity, drought, heat, hydrogen peroxide, and application of abscisic acid or salicylic acid. Constitutive expression enhances the tolera…
AT2G09165	7.48724	-1.88873	0.762066	-2.47844	0.0131959	0.040013	14.8346	6.336	19.2436	4.54795	5.48454	0.993737	AT2G09165	NA	AT2G09165	NA
AT1G02420	28.104	-1.8882	0.439308	-4.29812	1.72253e-05	0.000138988	40.0535	27.8784	31.6144	3.41096	15.3567	7.9499	AT1G02420	NA	AT1G02420	NA
AT3G62100	60.2896	-1.87348	0.484202	-3.86921	0.000109186	0.00069232	284.825	126.72	104.465	67.0823	21.9382	51.6743	AT3G62100	IAA30	AT3G62100	Encodes a member of the Aux/IAA family of proteins implicated in auxin signaling. IAA30 lacks the conserved degron (domain II) found in many family members. IAA30 transcripts are induced by auxin treatment and accumulate preferentially in the quiescent center cells of the root meristem. Overexpression of IAA30 leads to defects in gravitropism, root development, root meristem maintenance, and coty…
AT5G39720	5492.45	-1.87302	0.442303	-4.23471	2.2885e-05	0.000178504	20498.5	15836.2	14117.9	6841.26	4547.78	2384.97	AT5G39720	AIG2L	AT5G39720	NA
AT5G46350	70.7299	-1.87051	0.370321	-5.05105	4.39377e-07	5.36324e-06	212.135	181.21	200.683	30.6987	91.0434	40.7432	AT5G46350	ATWRKY8, WRKY8	AT5G46350	member of WRKY Transcription Factor; Group II-c
AT2G08755	33.9133	-1.8574	0.732017	-2.53737	0.011169	0.0349289	5.93385	8.8704	12.3709	5.68494	0	1.98747	AT2G08755	NA	AT2G08755	NA
AT2G05765	101.435	-1.85129	0.719286	-2.57379	0.0100593	0.032132	10.3842	10.1376	2.74908	5.68494	0	0.993737	AT2G05765	NA	AT2G05765	NA
AT1G10770	20.7278	-1.8471	0.635608	-2.90603	0.00366045	0.0138479	32.6362	30.4128	104.465	17.0548	5.48454	23.8497	AT1G10770	NA	AT1G10770	Encodes a putative pectin methylesterase/invertase inhibitor. Anti-sense reduction of this gene's transcript results in pollen tube growth retardation and then partial male sterility and reduced seed set.
AT3G60970	194.45	-1.84673	0.260271	-7.09543	1.28949e-12	4.90423e-11	703.162	496.743	534.696	206.932	141.501	134.154	AT3G60970	ABCC15, ATMRP15, MRP15	AT3G60970	member of MRP subfamily
AT5G16980	564.12	-1.83886	0.130129	-14.1311	2.44424e-45	2.12999e-42	1206.06	1175.96	1215.09	371.795	351.011	284.209	AT5G16980	NA	AT5G16980	NA
AT4G33960	54.5881	-1.83784	0.351281	-5.23182	1.67852e-07	2.26869e-06	48.9543	76.032	60.4798	11.3699	14.2598	25.8372	AT4G33960	NA	AT4G33960	NA
AT2G38340	244.052	-1.83608	0.165154	-11.1174	1.03251e-28	2.83489e-26	682.393	505.613	519.576	146.671	183.184	148.067	AT2G38340	DREB19	AT2G38340	encodes a member of the DREB subfamily A-2 of ERF/AP2 transcription factor family. The protein contains one AP2 domain. There are eight members in this subfamily including DREB2A AND DREB2B that are involved in response to drought.
AT1G26762	90.7822	-1.83598	0.357226	-5.13954	2.75412e-07	3.52496e-06	43.0204	41.8176	30.2399	15.9178	6.58145	9.93737	AT1G26762	NA	AT1G26762	NA
AT1G69260	308.337	-1.82736	0.214961	-8.50087	1.88171e-17	1.47902e-15	882.661	595.584	746.375	226.261	212.8	187.816	AT1G69260	AFP1	AT1G69260	NA
AT1G29962	7.80651	-1.82551	0.756941	-2.41169	0.0158787	0.0464879	8.90078	13.9392	15.1199	3.41096	4.38763	2.98121	AT1G29962	AGL64	AT1G29962	NA
AT1G77660	33.1003	-1.82126	0.465539	-3.91215	9.14785e-05	0.000593268	32.6362	62.0928	41.2362	7.95892	19.7443	10.9311	AT1G77660	NA	AT1G77660	NA
AT5G67080	609.005	-1.81657	0.342514	-5.30363	1.13522e-07	1.60234e-06	682.393	267.379	247.417	120.521	133.823	85.4614	AT5G67080	MAPKKK19, MKK19	AT5G67080	member of MEKK subfamily
AT4G21990	1286.9	-1.81258	0.172253	-10.5228	6.78511e-26	1.37368e-23	1065.13	1391.39	1000.67	239.904	360.883	382.589	AT4G21990	APR3, ATAPR3, PRH-26, PRH26	AT4G21990	Encodes a protein disulfide isomerase-like (PDIL) protein, a member of a multigene family within the thioredoxin (TRX) superfamily. This protein also belongs to the adenosine 5'-phosphosulfate reductase-like (APRL) group.
AT1G70680	12.6745	-1.79914	0.665787	-2.70228	0.0068866	0.0235623	56.3716	22.8096	15.1199	10.2329	9.87217	6.95616	AT1G70680	NA	AT1G70680	NA
AT3G27360	180.752	-1.79248	0.214407	-8.36017	6.26297e-17	4.54814e-15	450.973	338.343	398.617	136.439	120.66	86.4551	AT3G27360	H3.1, HTR3	AT3G27360	NA
AT1G35720	298.775	-1.78932	0.362179	-4.94043	7.79488e-07	8.90723e-06	565.2	513.216	420.609	135.302	138.21	159.992	AT1G35720	ANN1, ANNAT1, AtANN1, ATOXY5, OXY5	AT1G35720	Encodes a member of the annexin gene family, a diverse, multigene family of calcium-dependent, membrane-binding proteins. The protein was determined to have peroxidase activity. This activity is thought to be dependent on the presence of post-translational modifications (most likely phosphorylation). The protein was shown to be present as a mixture of monomer and homodimer. The homodimerization s…
AT5G63625	17.2169	-1.78669	0.695176	-2.57012	0.0101663	0.0323915	19.285	20.2752	16.4945	1.13699	14.2598	0.993737	AT5G63625	NA	AT5G63625	NA
ATCG00360	16.3328	-1.78189	0.721596	-2.46937	0.013535	0.0408558	19.285	45.6192	24.7417	0	10.9691	14.9061	ATCG00360	YCF3	ATCG00360	Encodes a protein required for photosystem I assembly and stability. In Chlamydomonas reinhardtii, this protein seems to act as a PSI specific chaperone facilitating the assembly of the complex by interacting with PsaA and PsaD. A loss of function mutation in tobacco leads to a loss of photosystem I.
ATCG01100	31.6864	-1.78013	0.621657	-2.86353	0.00418955	0.0155531	40.0535	77.2992	59.1052	21.6028	10.9691	18.881	ATCG01100	NDHA	ATCG01100	NADH dehydrogenase ND1
[truncated: 448 more rows]

## Sheet: DEGs in imbibition seeds
	baseMean	log2FoldChange	lfcSE	stat	pvalue	padj	HS_Col_1	HS_Col_2	HS_Col_3	HS_dog1-2_1	HS_dog1-2_2	HS_dog1-2_3	TAIR	SYMBOL	TAIR	GENENAME
[truncated: 3,987 more rows]
