# Supplementary material for: DELAY OF GERMINATION 1, the Master Regulator of Seed Dormancy, Integrates the Regulatory Network of Phytohormones at the Transcriptional Level to Control Seed Dormancy
Source: Curr Issues Mol Biol. 2022 Dec 8;44(12):6205–17. doi: 10.3390/cimb44120423 (PMC9777134; doi:10.3390/cimb44120423)
Supplement: Supplementary file 1 [file cimb-44-00423-s001.zip › Table S2. The Hormone-related genes list.xls]

## Sheet: ABA
				DS_dog1-2 V Col		IS_dog1-2 V Col			ABA	No.
ABA	H/S	Category	Name	Log2 FC	P_value	Log2 FC	P_value		detectable	110
	ABA homeostasis	Anabolism	ABA1/ZEP	-0.68723	9.19608e-16	-2.22654	8.29e-136		Not detectable	4
	ABA homeostasis	Anabolism	VDE1	-0.154578	0.119718	-0.384032	0.000267869		Repeat marker	0
	ABA homeostasis	Anabolism	ABA4	2.22556	1.07144e-25	0.971368	4.05e-10		Total	114
	ABA homeostasis	Anabolism	NCED1	0.262637	2.65925e-05	-0.30153	1.33e-06
	ABA homeostasis	Anabolism	NCED2	-2.55717	8.21415e-11	-1.04547	0.0219243
	ABA homeostasis	Anabolism	NCED3	-1.22782	0.0081896	0.99464	0.080422
	ABA homeostasis	Anabolism	NCED4	-0.830821	4.41969e-05	-1.66094	4.82e-13
	ABA homeostasis	Anabolism	NCED5	-2.77453	1.6122e-21	-2.98368	5.45e-23
	ABA homeostasis	Anabolism	NCED6	-0.0746063	0.848527	-0.18343	0.674683
	ABA homeostasis	Anabolism	NCED9	0.157441	0.410935	-1.56346	5.81e-11
	ABA homeostasis	Anabolism	ABA2	-0.698315	0.0594167	0.20617	0.542161
	ABA homeostasis	Anabolism	AAO3	-0.359896	0.00577367	-0.725814	4.63e-08
	ABA homeostasis	Anabolism	ABA3	-0.0647871	0.607986	-0.598086	3.92e-06
	ABA homeostasis	Anabolism	CNX2	-0.62101	3.65676e-12	-0.908948	5.18e-21
	ABA homeostasis	Anabolism	CNX3	0.116624	0.398963	0.330167	0.0032665
	ABA homeostasis	Catabolism	CYP707A1	-0.073846	0.814332	-1.00837	0.00360687
	ABA homeostasis	Catabolism	CYP707A2	-0.643172	0.000109946	-0.546446	0.000945437
	ABA homeostasis	Catabolism	CYP707A3	0.53111	0.260928	1.17998	0.00689497
	ABA homeostasis	Catabolism	UGT71C5	-0.550116	9.32306e-08	-0.535747	1.69e-07
	ABA homeostasis	Catabolism	atBG1	-2.67595	NA	1.7729	NA
	ABA homeostasis	Transport	ABCG22	0	1	2.31164	0.726584
	ABA homeostasis	Transport	ABCG40	0.314997	0.348449	0.279361	0.338917
	ABA homeostasis	Transport	AIT1	1.48464	1.25075e-09	3.26095	1.86e-56
	ABA homeostasis	Transport	NPF5.1	-0.183164	0.717486	-1.41582	0.0072244
	ABA homeostasis	Transport	ABCG25	0.0764698	0.769183	1.11866	1.76e-05
	ABA homeostasis	Transport	AtDTX50	0.480966	0.868476	0.736413	0.799416
	ABA homeostasis	Transport	ABCC1	-0.26775	0.0179834	-0.00486619	0.965147
	ABA homeostasis	Transport	ABCC2	-0.585333	2.41523e-09	-0.0429024	0.632344
	ABA signaling	Receptor	PYR1	0.608792	6.00106e-08	1.11221	8.4e-25
	ABA signaling	Receptor	PYL1	1.30023	0.0046602	2.15573	9.72e-20
	ABA signaling	Receptor	PYL2	0.772918	2.4158e-05	2.32036	5.51e-51
	ABA signaling	Receptor	PYL3	-4.39738	0.00243374	0	1
	ABA signaling	Receptor	PYL4	0.821692	0.00300566	1.1924	8.87e-28
	ABA signaling	Receptor	PYL5	-0.559656	0.000401072	-0.12316	0.428159
	ABA signaling	Receptor	PYL6	-2.78119	0.0560918	3.05199	1.08e-46
	ABA signaling	Receptor	PYL7	0.18253	0.232491	-1.129	7.93e-08
	ABA signaling	Receptor	PYL8	0.734351	0.000107768	1.61304	5.24e-22
	ABA signaling	Receptor	PYL9	-0.620854	0.000187781	-0.65809	0.000230276
	ABA signaling	Receptor	PYL10	0	1	0	1
	ABA signaling	Receptor	PYL11	0.0107805	0.952896	-2.57011	7.66e-45
	ABA signaling	Receptor	PYL12	-1.49789	4.91425e-11	-2.94676	3.12e-27
	ABA signaling	Receptor	PYL13	1.68792	1.0025e-14	-0.975859	0.000381682
	ABA signaling	Transducer	CARK1	-0.103204	0.268464	-0.180377	0.0607977
	ABA signaling	Transducer	CARK2	-0.018289	0.891786	-0.345349	0.0141737
	ABA signaling	Transducer	CARK3	0.203127	0.174791	-0.0416915	0.771587
	ABA signaling	Transducer	CARK4	0	1	3.02429	0.646315
	ABA signaling	Transducer	CARK6	-0.860011	0.219469	0.0492572	0.959032
	ABA signaling	Transducer	CARK7	0.48425	9.22638e-09	-0.0260186	0.750113
	ABA signaling	Transducer	CARK8	0.352849	0.0232814	-0.539883	0.000192514
	ABA signaling	Transducer	CARK9	0.571879	0.463776	-0.746889	0.300126
	ABA signaling	Transducer	CARK10	1.44592	0.00259337	-0.138691	0.935853
	ABA signaling	Transducer	CARK11	-0.271898	0.00611492	-0.0149604	0.877682
	ABA signaling	Transducer	CAR1	0.326799	0.132346	0.131582	0.53394
	ABA signaling	Transducer	CAR2	2.03285	0.370601	-0.510657	0.787021
	ABA signaling	Transducer	CAR3	0	1	1.70288	0.797544
	ABA signaling	Transducer	CAR4	0.0949344	0.824099	0.22062	0.709138
	ABA signaling	Transducer	CAR5	0	1	0	1
	ABA signaling	Transducer	CAR6	-1.09699	0.000119423	-2.08738	4.1e-13
	ABA signaling	Transducer	CAR7	-0.752188	7.49779e-06	-1.39155	4.02e-16
	ABA signaling	Transducer	CAR8	-0.321751	0.749848	-0.723372	0.525905
	ABA signaling	Transducer	CAR9	-0.870209	7.66006e-07	-1.13187	5.18e-11
	ABA signaling	Transducer	CAR10	0.99725	4.68019e-06	0.531177	0.0119149
	ABA signaling	Transducer	RCN1	0.399471	5.29544e-05	0.321925	0.000952212
	ABA signaling	Transducer	HAB1	-0.658506	4.87564e-08	-1.48042	2.21e-32
	ABA signaling	Transducer	HAB2	-0.154314	0.0660254	-0.47405	3.41e-08
	ABA signaling	Transducer	AHG1	-0.748415	8.45701e-10	-2.23169	1.56e-72
	ABA signaling	Transducer	AHG3	-0.648162	1.81294e-07	0.0358432	0.773171
	ABA signaling	Transducer	ABI1	0.408416	0.00376604	0.814058	3.61e-09
	ABA signaling	Transducer	ABI2	-1.45549	2.48865e-22	-0.641091	0.000145425
	ABA signaling	Transducer	HAI1	-2.32167	3.3433e-19	-4.98631	1.39e-14
	ABA signaling	Transducer	HAI2	-1.25137	4.89316e-17	-2.23274	1.38e-51
	ABA signaling	Transducer	HAI3	0.655441	2.50277e-06	-1.73292	5.25e-35
	ABA signaling	Transducer	CK2	-0.135684	0.0181367	0.0287648	0.612909
	ABA signaling	Transducer	SnRK2.2	0.3813	7.32568e-09	-0.145058	0.0270959
	ABA signaling	Transducer	SnRK2.3	0.545883	2.43299e-06	0.514623	9.33e-06
	ABA signaling	Transducer	SnRK2.6	0.147359	0.643379	1.37907	7.93e-07
	ABA signaling	Transducer	CPK3	1.02495	1.85978e-09	1.05225	2.87e-11
	ABA signaling	Transducer	CPK4	-0.176693	0.252101	-0.117109	0.39579
	ABA signaling	Transducer	CPK6	0.0341808	0.760751	-0.198991	0.0616376
	ABA signaling	Transducer	CPK11	-0.334431	0.0408049	0.721001	3.27e-07
	ABA signaling	Transducer	ABI3	0.371567	1.32442e-06	-0.105273	0.164585
	ABA signaling	Transducer	ABI4	0.862692	0.000504314	2.02973	2.16e-18
	ABA signaling	Transducer	ABF1	-0.0525352	0.614686	-0.877843	4.19e-14
	ABA signaling	Transducer	ABF2/AREB1	1.61554	2.22687e-12	0.888824	0.000155306
	ABA signaling	Transducer	ABF3/DPBF3	1.77334	0.156353	3.33534	0.00418893
	ABA signaling	Transducer	ABF4/AREB2	-1.0854	1.84851e-22	-2.51997	1.89e-103
	ABA signaling	Transducer	ABI5/DPBF1	-1.02221	5.33772e-23	-1.94835	2.84e-76
	ABA signaling	Transducer	AFP1	-1.81867	1.01636e-22	-2.79145	4.31e-38
	ABA signaling	Transducer	AFP2	-0.575184	6.44635e-06	-1.03434	4.19e-15
	ABA signaling	Transducer	AFP3	-2.18032	1.53303e-25	-2.74149	3.27e-30
	ABA signaling	Transducer	AFP4	-1.59427	7.71297e-12	0.00973467	0.964326
	ABA signaling	Transducer	BZIP67/DPBF2	1.47574	0.00321623	-1.13249	0.0681353
	ABA signaling	Transducer	AREB3/DPBF3	0.320311	2.51895e-06	-0.455112	3.19e-11
	ABA signaling	Transducer	BZIP12/DPBF4	0.532805	3.98147e-08	-1.00853	4.8e-23
	ABA signaling	Transducer	SOS2	-0.0778786	0.650925	-0.1585	0.324312
	ABA signaling	Transducer	CIPK23	0.0356799	0.846632	0.863926	6.66e-06
	ABA signaling	Transducer	RDK1	-0.0131175	0.966479	0.389188	0.141514
	ABA signaling	Transducer	PUB12	-0.255602	0.222247	-0.429185	0.0282818
	ABA signaling	Transducer	PUB13	-0.0513985	0.481903	-0.434063	8.9e-09
	ABA signaling	Transducer	RGLG1	-0.469834	7.44249e-05	-0.598166	1.34e-06
	ABA signaling	Transducer	RGLG5	-0.324879	0.0198092	-0.522065	0.000324577
	ABA signaling	Transducer	AEL	-0.122971	0.0441845	-0.161031	0.00692076
	ABA signaling	Transducer	CEPR2	1.01268	0.00432329	0.0318282	0.922183
	ABA signaling	Transducer	ABH1	-0.043136	0.549436	-0.0872051	0.199075
	ABA signaling	Transducer	ERA1	-0.69687	4.04629e-09	-0.0725696	0.52212
	ABA signaling	Transducer	PUB11	0.00418796	0.994622	2.15702	3.2e-06
	ABA signaling	Marker	RAB18	-1.20218	5.98686e-15	-3.50908	2.11e-114
	ABA signaling	Marker	RD26	-0.297726	0.14108	-2.02468	8.62e-18
	ABA signaling	Marker	RD29A	0.0317193	0.94354	-1.78988	7.31e-05
	ABA signaling	Marker	RD29B	-0.651577	0.00019965	-4.19417	5.95e-122
	ABA homeostasis	Catabolism	CYP707A4	#N/A	#N/A	#N/A	#N/A
	ABA homeostasis	Catabolism	UGT71B6	#N/A	#N/A	#N/A	#N/A
	ABA homeostasis	Catabolism	atBG2	#N/A	#N/A	#N/A	#N/A
	ABA signaling	Transducer	PKS5	#N/A	#N/A	#N/A	#N/A

## Sheet: IAA
				DS_dog1-2 V Col		IS_dog1-2 V Col			IAA	No.
Auxin	H/S	Category	Name	Log2 FC	P_value	Log2 FC	P_value		detectable	132
	Auxin homeostasis	Anabolism	TAA1	1.62552	9.74115e-05	3.87851	1.89e-27		Not detectable	6
	Auxin homeostasis	Anabolism	TAR2	0.68632	0.000191768	0.867896	2.12e-07		Repeat marker	0
	Auxin homeostasis	Anabolism	TAR3	0.531471	0.297257	-0.562307	0.274903		Total	138
	Auxin homeostasis	Anabolism	TAR4	0.416796	0.716567	0.642293	0.527466
	Auxin homeostasis	Anabolism	VAS1	-0.0603396	0.531994	-0.0445273	0.620868
	Auxin homeostasis	Anabolism	YUC1	0	1	4.51235	0.420859
	Auxin homeostasis	Anabolism	YUC2	-3.80704	0.0061212	0	1
	Auxin homeostasis	Anabolism	YUC3	3.41728	0.0462235	4.34497	0.0150266
	Auxin homeostasis	Anabolism	YUC4	1.15184	0.17311	0.960858	0.133181
	Auxin homeostasis	Anabolism	YUC5	1.42214	0.830451	0	1
	Auxin homeostasis	Anabolism	YUC6	1.81801	0.000425977	2.18138	1.22e-06
	Auxin homeostasis	Anabolism	YUC7	1.82387	0.589201	1.76609	0.617872
	Auxin homeostasis	Anabolism	YUC8	0	1	4.1532	0.527038
	Auxin homeostasis	Anabolism	YUC9	0	1	1.69216	0.798808
	Auxin homeostasis	Anabolism	YUC10	-1.82851	0.751259	0	1
	Auxin homeostasis	Anabolism	AMI1	1.91222	1.21631e-14	0.818651	0.000427068
	Auxin homeostasis	Anabolism	CYP79B2	0.988558	0.259256	0.932935	0.286106
	Auxin homeostasis	Anabolism	CYP79B3	-0.66242	0.413887	0.573759	0.436996
	Auxin homeostasis	Anabolism	GH3.15	0.976614	1.01077e-16	-0.43417	0.000197166
	Auxin homeostasis	Catabolism	GH3.1	1.28576	2.39803e-07	3.07974	9.37e-38
	Auxin homeostasis	Catabolism	GH3.2	-0.228337	0.41715	-0.533868	0.062261
	Auxin homeostasis	Catabolism	GH3.3	0.108703	0.974525	3.52754	0.298859
	Auxin homeostasis	Catabolism	GH3.5	2.50889	2.8712e-10	3.02311	1.02e-14
	Auxin homeostasis	Catabolism	GH3.6	1.95868	0.000901938	3.72385	2.23e-12
	Auxin homeostasis	Catabolism	GH3.9	1.04332	0.194443	-0.363399	0.735356
	Auxin homeostasis	Catabolism	GH3.17	0.617492	0.753457	4.49621	0.000265864
	Auxin homeostasis	Catabolism	IAMT1	0.457572	0.647171	0.752122	0.678227
	Auxin homeostasis	Catabolism	MES17	1.13794	0.557453	-3.99817	0.0576194
	Auxin homeostasis	Catabolism	DAO1	-0.34405	0.0107138	-0.166971	0.258107
	Auxin homeostasis	Catabolism	DAO2	0.617482	0.765236	2.36842	0.103241
	Auxin homeostasis	Catabolism	ILR1	-0.122741	0.334327	-0.817713	5.38e-10
	Auxin homeostasis	Catabolism	IAR3	-0.445387	1.59573e-08	0.0103118	0.886042
	Auxin homeostasis	Catabolism	ILL1	0.0395883	0.837455	0.315843	0.0296593
	Auxin homeostasis	Catabolism	ILL2	0.365387	0.00803395	0.068827	0.586863
	Auxin homeostasis	Catabolism	ILL6	-0.653061	7.17693e-06	-0.842505	2.07e-08
	Auxin homeostasis	Catabolism	IAR4	-0.177205	0.00373183	-0.277398	5.2e-06
	Auxin homeostasis	Catabolism	UGT84B1	0.617428	0.926165	1.30393	0.843679
	Auxin homeostasis	Catabolism	UGT74E2	-1.00277	1.07362e-13	-0.588382	2.13e-05
	Auxin homeostasis	Catabolism	IBR1	0.110478	0.150125	-0.202188	0.00684046
	Auxin homeostasis	Catabolism	IBR3	-0.492802	1.70626e-08	-0.914018	2.68e-25
	Auxin homeostasis	Catabolism	IBR10	-0.128617	0.347652	0.750821	3.06e-08
	Auxin homeostasis	Transport	AUX1	2.71883	1.05831e-09	3.49226	3.49e-31
	Auxin homeostasis	Transport	LAX1	5.03825	0.000111228	3.90782	7.57e-10
	Auxin homeostasis	Transport	LAX2	1.42567	0.000386775	3.4692	2.4e-15
	Auxin homeostasis	Transport	LAX3	0	1	4.50946	0.492472
	Auxin homeostasis	Transport	AXR4	-0.0776345	0.464596	0.525015	1.42e-07
	Auxin homeostasis	Transport	ABCB1/PGP1	0.295174	0.00234059	0.577336	4.68e-11
	Auxin homeostasis	Transport	ABCB2/PGP2	0.154724	0.314705	0.579147	7.78e-05
	Auxin homeostasis	Transport	ABCB3	0	1	-1.10046	0.868825
	Auxin homeostasis	Transport	ABCB4/PGP4	-1.12333	5.0258e-08	0.205473	0.206943
	Auxin homeostasis	Transport	ABCB6	-0.208684	0.080214	0.134977	0.247103
	Auxin homeostasis	Transport	ABCB10	0	1	0	1
	Auxin homeostasis	Transport	ABCB11	-0.468078	0.32343	0.0790575	0.82216
	Auxin homeostasis	Transport	ABCB14	0	1	4.01965	0.540936
	Auxin homeostasis	Transport	ABCB15	0.781946	8.89845e-09	1.41271	5.21e-27
	Auxin homeostasis	Transport	ABCB19/MDR1	-0.150237	0.215207	1.10123	1.27e-23
	Auxin homeostasis	Transport	ABCB20	-0.689189	3.19008e-09	0.133926	0.183918
	Auxin homeostasis	Transport	ABCB21	1.88448	4.86341e-06	1.47548	9.77e-07
	Auxin homeostasis	Transport	PIN1	0.788834	2.00339e-05	2.54777	4.98e-54
	Auxin homeostasis	Transport	PIN2	1.20409	9.63725e-08	2.60704	1.51e-37
	Auxin homeostasis	Transport	PIN3	2.63527	2.26372e-11	3.5705	1.94e-30
	Auxin homeostasis	Transport	PIN4	0.320955	0.239598	1.45155	2.82e-07
	Auxin homeostasis	Transport	PIN6	1.20015	0.489157	2.96403	0.0757823
	Auxin homeostasis	Transport	PIN7	2.7956	4.21033e-07	3.79817	1.52e-26
	Auxin homeostasis	Transport	PIN8	-2.79004	0.672972	0	1
	Auxin homeostasis	Transport	PID	1.19956	5.61352e-06	-0.384665	0.131456
	Auxin homeostasis	Transport	PID2	1.83041	0.00340026	2.65713	5.62e-06
	Auxin homeostasis	Transport	WAG1	-0.000189752	0.999893	1.32115	0.325576
	Auxin homeostasis	Transport	WAG2	4.60098	0.483536	6.04032	0.3572
	Auxin homeostasis	Transport	PILS1	0.0896751	0.9659	-1.10048	0.670199
	Auxin homeostasis	Transport	PILS2	-0.0272663	0.859443	0.145266	0.31586
	Auxin homeostasis	Transport	PILS3	-1.7608	1.43835e-63	-0.393508	5.1e-05
	Auxin homeostasis	Transport	PILS4	-0.200405	0.885074	0	1
	Auxin homeostasis	Transport	PILS5	-0.206376	0.164376	1.28981	8.79e-16
	Auxin homeostasis	Transport	PILS6	-0.450548	0.000287035	-0.750569	1.66e-08
	Auxin homeostasis	Transport	PILS7	0.465692	0.748612	1.3246	0.496249
	Auxin homeostasis	Transport	D6PK	-0.304998	0.00412546	0.517853	6.28e-07
	Auxin homeostasis	Transport	D6PKL1	-0.225171	0.144324	0.218857	0.124707
	Auxin homeostasis	Transport	D6PKL2	0.143857	0.078327	0.225718	0.00347056
	Auxin homeostasis	Transport	D6PKL3	0.119431	0.349162	-0.504656	6.39e-05
	Auxin signaling	Receptor	ABP1	-0.950624	3.59499e-09	-0.531123	0.000230013
	Auxin signaling	Receptor	TIR1	0.124384	0.0781394	0.57373	1.68e-15
	Auxin signaling	Transducer	TMK1	1.49841	0.00112258	2.90609	3.71e-20
	Auxin signaling	Transducer	AXR1	-0.202789	0.010599	0.465477	1.91e-10
	Auxin signaling	Transducer	AFB1	-0.247161	0.0297075	0.0528518	0.654797
	Auxin signaling	Transducer	AFB2	-0.474879	2.80561e-05	0.41679	7.17e-05
	Auxin signaling	Transducer	AFB3	0.0158831	0.926853	0.574172	0.000448264
	Auxin signaling	Transducer	AFB4	0.152375	0.404617	0.402223	0.00917782
	Auxin signaling	Transducer	AFB5	0.495085	0.000216567	0.754159	6.18e-10
	Auxin signaling	Transducer	SKP1	-0.244297	0.00614714	-0.0551592	0.536294
	Auxin signaling	Transducer	SKP1B	-0.00794594	0.922054	-0.426964	1.49e-07
	Auxin signaling	Transducer	CUL1/AXR6	-0.100216	0.0640717	-0.598432	1.83e-28
	Auxin signaling	Transducer	IAA1	0.0567608	0.968685	1.55698	0.262976
	Auxin signaling	Transducer	IAA3	0.000803847	0.999144	2.61991	0.00179315
	Auxin signaling	Transducer	IAA5	0	1	0	1
	Auxin signaling	Transducer	IAA7	-0.262356	0.829057	2.18963	0.0605026
	Auxin signaling	Transducer	IAA8	1.83541	7.56665e-30	1.15862	1.66e-14
	Auxin signaling	Transducer	IAA9	0.459999	2.06583e-11	0.43439	5.52e-11
	Auxin signaling	Transducer	IAA10	-0.167773	0.494007	-0.75136	0.00792942
	Auxin signaling	Transducer	IAA12	-0.270051	0.0919117	0.649833	8.25e-06
	Auxin signaling	Transducer	IAA14	-1.9587	0.0624323	0.0660279	0.933022
	Auxin signaling	Transducer	IAA15	0.224957	0.904889	-2.61504	0.219661
	Auxin signaling	Transducer	IAA16	0.309844	0.577329	3.14478	6.11e-21
	Auxin signaling	Transducer	IAA17	2.98611	0.019835	4.47677	5.55e-05
	Auxin signaling	Transducer	IAA18	1.54462	9.76549e-06	0.961114	0.000403491
	Auxin signaling	Transducer	IAA19	-2.10623	0.567549	4.20206	0.235704
	Auxin signaling	Transducer	IAA20	0.78751	0.507009	1.74563	0.135879
	Auxin signaling	Transducer	IAA26	1.02648	5.16605e-09	1.79469	1.83e-25
	Auxin signaling	Transducer	IAA27	0.165975	0.775104	1.86112	0.000420784
	Auxin signaling	Transducer	IAA28	1.99434	1.70674e-05	0.566236	0.240994
	Auxin signaling	Transducer	IAA29	0	1	1.70288	0.797544
	Auxin signaling	Transducer	IAA30	-1.86221	2.34372e-06	0.810422	0.100379
	Auxin signaling	Transducer	IAA31	0	1	2.70245	0.68213
	Auxin signaling	Transducer	IAA32	0.388847	0.0391291	-2.04669	0.000617521
	Auxin signaling	Transducer	IAA33	3.50411	0.00243569	2.74133	1.01e-07
	Auxin signaling	Transducer	ARF1	0.0641187	0.25087	-0.505394	1.38e-19
	Auxin signaling	Transducer	ARF2	-0.046881	0.579244	-0.0262118	0.756154
	Auxin signaling	Transducer	ARF3	0.511125	6.65258e-06	0.697047	1.14e-14
	Auxin signaling	Transducer	ARF4	0.0084123	0.920728	-0.124067	0.0889242
	Auxin signaling	Transducer	ARF5; IAA24	1.36102	0.0128711	2.51695	3.36e-07
	Auxin signaling	Transducer	ARF6	0.512343	2.64861e-08	0.42723	1.27e-07
	Auxin signaling	Transducer	ARF7; IAA21	-0.234462	0.00668361	-0.401457	4.2e-06
	Auxin signaling	Transducer	ARF8	0.0621772	0.581398	0.682628	5.75e-15
	Auxin signaling	Transducer	ARF9	0.103026	0.397649	0.199609	0.0673416
	Auxin signaling	Transducer	ARF10	-0.685818	5.31989e-08	-0.580777	7.32e-07
	Auxin signaling	Transducer	ARF16	-0.320825	0.000236472	0.0451486	0.608766
	Auxin signaling	Transducer	ARF17	-0.362564	0.00933572	0.749775	1.78e-09
	Auxin signaling	Transducer	ARF18	0.0210982	0.762661	-0.320789	3.67e-05
	Auxin signaling	Transducer	ARF19; IAA22	0.0488518	0.82205	0.944632	3e-07
	Auxin signaling	Marker	SAUR7	-0.417691	0.802532	-2.59348	0.227659
	Auxin signaling	Marker	SAUR36	-0.240651	0.154136	-2.51293	2.13e-38
	Auxin signaling	Marker	SAUR46	-0.296241	0.89508	0	1
	Auxin homeostasis	Anabolism	TAR1	#N/A	#N/A	#N/A	#N/A
	Auxin homeostasis	Anabolism	YUC11	#N/A	#N/A	#N/A	#N/A
	Auxin homeostasis	Catabolism	GH3.4	#N/A	#N/A	#N/A	#N/A
	Auxin homeostasis	Catabolism	UGT74D1	#N/A	#N/A	#N/A	#N/A
	Auxin homeostasis	Transport	PIN5	#N/A	#N/A	#N/A	#N/A
	Auxin signaling	Transducer	IAA6	#N/A	#N/A	#N/A	#N/A

## Sheet: JA
				DS_dog1-2 V Col		IS_dog1-2 V Col			JA	No.
JA	H/S	Category	Name	Log2 FC	P_value	Log2 FC	P_value		detectable	44
	JA homeostasis	Anabolism	LOX2	0	1	-1.13455	0.643732		Not detectable	3
	JA homeostasis	Anabolism	LOX3	0.209696	0.660172	0.0567136	0.905033		Repeat marker	0
	JA homeostasis	Anabolism	LOX4	0.287143	0.669766	-1.37365	0.080211		Total	47
	JA homeostasis	Anabolism	LOX6	0.0514743	0.749795	0.20084	0.20558
	JA homeostasis	Anabolism	AOS	-0.361633	0.0250743	-1.67615	1.82e-22
	JA homeostasis	Anabolism	AOC1	1.11438	0.486101	2.83548	0.119646
	JA homeostasis	Anabolism	AOC2	0.797191	0.0404379	-0.727394	0.285852
	JA homeostasis	Anabolism	AOC3	0.110453	0.67677	-0.753407	0.00793707
	JA homeostasis	Anabolism	AOC4	0.288189	0.115822	1.37539	2.97e-18
	JA homeostasis	Anabolism	At4g05160	0.179067	0.01892	-0.396491	9.17e-08
	JA homeostasis	Anabolism	At5g63380	0.362385	0.556268	2.04344	0.000346028
	JA homeostasis	Anabolism	OPR1	-2.26293	2.00411e-13	1.0674	0.000117791
	JA homeostasis	Anabolism	OPR2	1.1333	0.0408594	1.74692	0.000767235
	JA homeostasis	Anabolism	OPR3	0.823987	0.00011602	0.759101	0.000418155
	JA homeostasis	Anabolism	OPCL1	0.635774	0.0472802	-0.0424647	0.896176
	JA homeostasis	Catabolism	JAR1	0.602692	8.65463e-10	0.394766	1.68e-05
	JA homeostasis	Catabolism	JMT	0	1	0	1
	JA homeostasis	Transport	JAT1	0.0236303	0.969858	1.50716	0.0183158
	JA signaling	Receptor	COI1	-0.0911726	0.21984	0.109174	0.13307
	JA signaling	Transducer	JAZ1	1.04037	8.96136e-08	1.04543	5.76e-09
	JA signaling	Transducer	JAZ2	0.754955	9.64011e-10	0.660164	2.08e-07
	JA signaling	Transducer	JAZ3	-0.338389	0.00146165	-0.898319	2e-15
	JA signaling	Transducer	JAZ4	-0.265631	0.129853	-1.51217	1.95e-13
	JA signaling	Transducer	JAZ5	1.57227	0.713763	-0.151095	0.971488
	JA signaling	Transducer	JAZ6	-0.21922	0.583937	-0.287811	0.422855
	JA signaling	Transducer	JAZ7	-0.199618	0.306901	-2.60796	1.42e-37
	JA signaling	Transducer	JAZ8	-1.56055	2.38994e-09	-2.96596	5.7e-17
	JA signaling	Transducer	JAZ9	0.985471	0.0187158	1.16895	0.006984
	JA signaling	Transducer	JAZ10	0.652681	0.000488255	0.857079	0.000221329
	JA signaling	Transducer	JAZ11	0.366248	0.00312637	-0.475135	0.00040588
	JA signaling	Transducer	JAZ12	-0.411101	0.0010176	-0.188094	0.150972
	JA signaling	Transducer	JAZ13	2.50503	0.70417	0	1
	JA signaling	Transducer	MYC3	-0.181174	0.143201	-0.268708	0.0307932
	JA signaling	Transducer	MYC4	1.15229	2.94337e-11	1.60627	5.32e-32
	JA signaling	Transducer	PUB10	0.928968	0.000220522	2.59507	7.46e-46
	JA signaling	Transducer	JAM1	-0.409373	0.0276789	0.221319	0.215729
	JA signaling	Transducer	JAM2	-0.296141	0.0122299	-0.184302	0.12017
	JA signaling	Transducer	JAM3	-0.605573	1.06147e-09	-0.382774	0.000152358
	JA signaling	Transducer	TPL	-0.464027	8.75971e-10	-0.46911	2.24e-10
	JA signaling	Transducer	NINJA	-0.0706202	0.211303	-0.366498	1.43e-12
	JA signaling	Transducer	UBP12	-0.0798554	0.33836	-0.264724	0.00135205
	JA signaling	Transducer	UBP13	-0.038923	0.593261	-0.450645	4.7e-10
	JA signaling	Marker	JR2	-1.30598	0.810152	2.31152	0.667003
	JA signaling	Marker	VSP2	0	1	-0.431869	0.882446
	JA signaling	Transducer	JAI1	#N/A	#N/A	#N/A	#N/A
	JA signaling	Transducer	BHLH14	#N/A	#N/A	#N/A	#N/A
	JA signaling	Marker	PDF1.2	#N/A	#N/A	#N/A	#N/A

## Sheet: SA
				DS_dog1-2 V Col		IS_dog1-2 V Col			SA	No.
SA	H/S	Category	Name	Log2 FC	P_value	Log2 FC	P_value		detectable	27
	SA homeostasis	Anabolism	ICS1	-1.98205	2.55734e-18	0.00114215	0.996306		Not detectable	2
	SA homeostasis	Anabolism	PBS3	-0.715851	0.319505	-3.49989	0.000158063		Repeat marker	0
	SA homeostasis	Anabolism	EPS1	0.510153	0.129679	0.927316	3.78e-06		Total	29
	SA homeostasis	Anabolism	PAL1	0.068314	0.946482	0.140709	0.869531
	SA homeostasis	Anabolism	PAL2	-0.40388	0.0387461	-0.390523	0.043241
	SA homeostasis	Anabolism	PAL3	2.67223	0.142103	4.50534	0.00374548
	SA homeostasis	Anabolism	PAL4	-0.20474	0.136887	-0.957915	4.6e-11
	SA homeostasis	Catabolism	UGT74F1	1.20518	0.373941	1.81801	0.0151131
	SA homeostasis	Catabolism	UGT74F2	-0.594	7.76312e-07	-1.02587	1.03e-16
	SA homeostasis	Catabolism	S5H/DMR6	-1.26521	7.81543e-10	-2.81111	1.98e-37
	SA homeostasis	Catabolism	DLO2	0.228437	0.337561	-1.59169	4.81e-11
	SA homeostasis	Transport	EDS5	0.589694	0.000698066	0.305031	0.110383
	SA signaling	Receptor	NPR3	-0.529477	0.00229561	-0.652167	6.76e-05
	SA signaling	Receptor	NPR4	-0.521885	0.00636883	-0.108611	0.449971
	SA signaling	Transducer	NPR1	-0.188665	0.167523	-0.450412	0.000851002
	SA signaling	Transducer	TGA2	-0.361811	7.00336e-07	-0.115245	0.0859546
	SA signaling	Transducer	TGA3	-0.0394048	0.740284	-0.145236	0.204561
	SA signaling	Transducer	TGA5	0.00138509	0.989007	-0.112033	0.272927
	SA signaling	Transducer	TGA6	0.11987	0.368016	-0.243346	0.0674689
	SA signaling	Transducer	SNI1	0.108483	0.793478	-0.800608	0.0117675
	SA signaling	Transducer	NIMIN1	-0.435288	0.645858	0.643514	0.401546
	SA signaling	Transducer	NIMIN2	-1.43118	2.2265e-11	-1.23224	6.29e-08
	SA signaling	Transducer	NIMIN3	-0.136891	0.626292	0.807476	0.0020691
	SA signaling	Transducer	ACD6	0	1	0.823088	0.901692
	SA signaling	Marker	PR1	6.48841	1.3496e-07	3.95979	1.38e-06
	SA signaling	Marker	PR2	0	1	-2.01416	0.761505
	SA signaling	Marker	PR5	-1.30585	0.844611	0	1
	SA homeostasis	Anabolism	ICS2	#N/A	#N/A	#N/A	#N/A
	SA homeostasis	Catabolism	S3H/DLO1	#N/A	#N/A	#N/A	#N/A

## Sheet: GA
				DS_dog1-2 V Col		IS_dog1-2 V Col			GA	No.
GA	H/S	Category	Name	Log2 FC	P_value	Log2 FC	P_value		detectable	57
	GA homeostasis	Anabolism	CPS/GA1	2.01498	0.000286772	-0.291185	0.556889		Not detectable	6
	GA homeostasis	Anabolism	KS1/GA2	0.434344	0.0020308	-0.724508	5.32e-07		Repeat marker	0
	GA homeostasis	Anabolism	KO1/GA3	-0.230262	0.00616897	-0.546356	5.89e-11		Total	63
	GA homeostasis	Anabolism	KAO1	0.10387	0.295444	0.646058	1.22e-12
	GA homeostasis	Anabolism	KAO2	0.124236	0.20891	0.420172	1.86e-05
	GA homeostasis	Anabolism	GA20ox1/GA5	3.40216	2.16881e-13	1.67586	3.07e-05
	GA homeostasis	Anabolism	GA20ox2	2.33801	7.53736e-07	0.515315	0.177942
	GA homeostasis	Anabolism	GA20ox3	1.64168	5.75259e-15	0.339015	0.0860456
	GA homeostasis	Anabolism	GA20ox5	0	1	-0.138688	0.983394
	GA homeostasis	Anabolism	GA3ox1/GA4	0	1	1.67211	1.39e-07
	GA homeostasis	Anabolism	GA3ox2	3.6931	0.00498634	3.43683	3.71e-23
	GA homeostasis	Anabolism	GA3ox3	1.57309	0.811517	0	1
	GA homeostasis	Anabolism	GA3ox4	1.15833	0.222672	2.90306	0.000226895
	GA homeostasis	Catabolism	GA2ox1	2.11956	0.748454	0	1
	GA homeostasis	Catabolism	GA2ox2	0.62818	7.90962e-05	0.993922	5e-08
	GA homeostasis	Catabolism	GA2ox3	1.81875	0.0700147	-1.64009	0.0243739
	GA homeostasis	Catabolism	GA2ox4	0	1	-2.55553	0.69913
	GA homeostasis	Catabolism	GA2ox6	-4.29389	1.58812e-21	-2.43681	3.09e-05
	GA homeostasis	Catabolism	GA2ox8	-2.20525	0.739668	0.823088	0.901692
	GA homeostasis	Catabolism	GAMT1	1.06425	0.426082	-1.16017	0.398329
	GA homeostasis	Catabolism	GAMT2	-2.75565	0.401956	0.868573	0.786264
	GA homeostasis	Catabolism	ELA1	2.36255	0.621951	-0.186635	0.968737
	GA homeostasis	Catabolism	ELA2	-0.896316	1.14352e-07	-1.01771	1.84e-09
	GA homeostasis	Transport	NRT1.11	0	1	1.69216	0.798808
	GA homeostasis	Transport	NRT1.12	1.82566	0.0141273	3.35381	9.07e-15
	GA homeostasis	Transport	NPF2.4	0	1	0.823088	0.901692
	GA homeostasis	Transport	NPF2.7	0.0290369	0.842837	-0.881545	1.66e-06
	GA homeostasis	Transport	NPF2.10	0.00428354	0.978954	1.24113	4.63e-15
	GA homeostasis	Transport	NPF2.11	0.513439	0.00536914	1.56655	8.13e-20
	GA homeostasis	Transport	NPF2.12	1.25849	0.0310121	-0.141654	0.876248
	GA homeostasis	Transport	NPF2.13	-0.0713655	0.658292	-0.685707	2.1e-05
	GA homeostasis	Transport	NPF3.1	-0.116961	0.527367	-1.56184	1.09e-16
	GA homeostasis	Transport	NPF4.1	-0.680215	1.67717e-08	-2.14574	1.41e-67
	GA homeostasis	Transport	NPF4.2	0.617523	0.926153	0.823088	0.901692
	GA homeostasis	Transport	NPF4.5	-2.06444	0.421495	0.106623	0.965103
	GA homeostasis	Transport	NPF5.2	-2.37785	2.21987e-33	-3.26447	9.09e-51
	GA homeostasis	Transport	NPF6.3	-0.485286	5.7346e-05	-0.61312	1.16e-09
	GA homeostasis	Transport	NPF8.2	-1.96833	1.59181e-10	-1.62826	7.79e-05
	GA homeostasis	Transport	SWEET14	0.617469	0.853348	-1.10048	0.741826
	GA signaling	Receptor	GID1a	-0.345733	0.000546885	-1.81041	2.31e-69
	GA signaling	Receptor	GID1b	-0.72385	0.374234	-0.285773	0.662461
	GA signaling	Receptor	GID1c	-0.311562	0.0172943	-0.86936	3.23e-10
	GA signaling	Transducer	RGA1	0.950518	1.39685e-08	1.45072	8.07e-21
	GA signaling	Transducer	RGA2/GAI	0.540312	1.7433e-05	0.90369	5.89e-14
	GA signaling	Transducer	RGL1	3.02596	0.00101294	2.7538	9.73e-16
	GA signaling	Transducer	RGL2	2.63947	9.98181e-54	1.28257	1.39e-14
	GA signaling	Transducer	RGL3	0.338016	0.0111529	1.50821	9.7e-30
	GA signaling	Transducer	SLY1	-0.301499	0.00807698	-0.324127	0.000981831
	GA signaling	Transducer	SLY2	1.81104	0.233351	0.888388	0.423082
	GA signaling	Transducer	SPY	-0.233119	0.00103088	-0.619838	1.93e-18
	GA signaling	Transducer	GARU	-0.260371	0.000971632	-0.744391	1.38e-19
	GA signaling	Transducer	TAGK2	0.260609	0.0138323	-0.274122	0.00563359
	GA signaling	Transducer	SPT	1.43024	1.6005e-10	2.49539	1.55e-35
	GA signaling	Transducer	SIZ1	-0.361095	7.71407e-07	-0.183463	0.0115738
	GA signaling	Marker	GASA4	6.96207	1.61904e-07	5.90646	4.26e-09
	GA signaling	Marker	GASA6	4.62868	4.58921e-06	6.08361	1.54e-10
	GA signaling	Marker	EXPA2	4.70129	1.46759e-05	5.66225	1.2e-07
	GA homeostasis	Anabolism	GA20ox4	#N/A	#N/A	#N/A	#N/A
	GA homeostasis	Catabolism	GA2ox5	#N/A	#N/A	#N/A	#N/A
	GA homeostasis	Catabolism	GA2ox7	#N/A	#N/A	#N/A	#N/A
	GA homeostasis	Transport	NPF2.3	#N/A	#N/A	#N/A	#N/A
	GA homeostasis	Transport	NPF2.5	#N/A	#N/A	#N/A	#N/A
	GA homeostasis	Transport	SWEET13	#N/A	#N/A	#N/A	#N/A

## Sheet: BR
				DS_dog1-2 V Col		IS_dog1-2 V Col			BR	No.
BR	H/S	Category	Name	Log2 FC	P_value	Log2 FC	P_value		detectable	62
	BR homeostasis	Anabolism	DWF7	0.282295	0.0522952	-0.0417486	0.766001		Not detectable	8
	BR homeostasis	Anabolism	DWF5	0.689978	0.0192553	0.332848	0.244107		Repeat marker	1	DWF4
	BR homeostasis	Anabolism	DWF1	2.99452	8.05561e-24	2.55456	2.54e-18		Total	69
	BR homeostasis	Anabolism	DWF4	0.763921	0.00927711	1.82985	4.75e-12
	BR homeostasis	Anabolism	CYP90C1	0.908035	2.33946e-15	0.201805	0.0760509
	BR homeostasis	Anabolism	CYP90D1	0	1	3.52756	0.591947
	BR homeostasis	Anabolism	DWF3	1.7861	5.46876e-18	1.78377	5.95e-20
	BR homeostasis	Anabolism	DET2	-0.0886134	0.495843	0.523896	7.94e-06
	BR homeostasis	Anabolism	CYP85A1	0	1	3.5001	0.594857
	BR homeostasis	Anabolism	CYP85A2	0.380722	0.0960066	1.99705	1.27e-20
	BR homeostasis	Catabolism	BIA1	-0.403543	0.950254	-1.10046	0.866176
	BR homeostasis	Catabolism	BAT1	2.53614	0.13218	-0.147005	0.923342
	BR homeostasis	Catabolism	BAS1	0.883323	0.000177896	0.871417	7.9e-05
	BR homeostasis	Catabolism	DOGT1	1.49162	0.00484386	2.07353	0.000209015
	BR homeostasis	Catabolism	SOB7	-0.949399	2.8557e-07	-2.23542	7.62e-25
	BR homeostasis	Catabolism	BEN1	2.76743	4.69772e-08	3.096	3.76e-23
	BR homeostasis	Catabolism	ST1	2.69393	1.90552e-05	0.796759	0.133453
	BR signaling	Receptor	BRI1	0.35499	4.44529e-05	0.600992	2.13e-14
	BR signaling	Receptor	BRL1	-0.118658	0.779452	0.760518	0.0268191
	BR signaling	Receptor	BRL3	0.293422	0.077921	0.468076	0.00442059
	BR signaling	Transducer	BSK1	0.177657	0.015642	-0.367854	6.82e-07
	BR signaling	Transducer	BSK2	0.706282	0.0882289	0.542756	0.101546
	BR signaling	Transducer	BSK3	0.299744	0.00076432	0.4778	2.33e-08
	BR signaling	Transducer	BAK1	-0.390709	3.08665e-06	-0.104011	0.209006
	BR signaling	Transducer	SERK1	-0.184838	0.486815	0.676588	0.00258272
	BR signaling	Transducer	SERK2	0.718866	2.42421e-05	0.838826	1.25e-11
	BR signaling	Transducer	SERK4	-0.461781	0.0372455	-0.132196	0.525526
	BR signaling	Transducer	BIR3	0.145226	0.242783	0.0156664	0.894487
	BR signaling	Transducer	BKI1	0.876742	0.000271468	0.654081	0.00120084
	BR signaling	Transducer	BIN2	0.134416	0.0375105	-0.401649	6.02e-10
	BR signaling	Transducer	BIL1	0.598487	4.97682e-09	0.395123	4.35e-05
	BR signaling	Transducer	BIL2	0.902109	5.95731e-23	-0.0466357	0.578754
	BR signaling	Transducer	SK32	-0.0638687	0.450373	-0.254602	0.00222964
	BR signaling	Transducer	KIB1	0	1	-2.01416	0.761505
	BR signaling	Transducer	KIB3	0	1	-2.5668	0.697851
	BR signaling	Transducer	BZR1	0.934035	0.000284778	1.48107	4.09e-12
	BR signaling	Transducer	BES1	1.46227	1.81004e-06	1.50387	5.64e-12
	BR signaling	Transducer	BEH1	1.88008	0.000271733	2.93298	4.55e-17
	BR signaling	Transducer	BEH2	0.0588243	0.631042	0.228961	0.0635485
	BR signaling	Transducer	BEH3	0.284712	0.255509	0.789548	0.00123844
	BR signaling	Transducer	BEH4	0.538232	0.000212864	0.442369	0.00506063
	BR signaling	Transducer	BIM1	0.785148	3.96155e-20	0.666678	6.32e-16
	BR signaling	Transducer	BIM2	-0.0734192	0.507118	-0.518673	4.33e-06
	BR signaling	Transducer	BIM3	0.328441	0.0187127	-0.837418	6.73e-10
	BR signaling	Transducer	BSU1	1.13667	0.546375	-1.32465	0.374959
	BR signaling	Transducer	BSL1	-0.423402	2.07182e-09	-0.229929	0.000701007
	BR signaling	Transducer	BSL2	-0.421662	3.26517e-07	-0.301129	0.000284626
	BR signaling	Transducer	BSL3	-0.16901	0.0168867	-0.275524	4.55e-05
	BR signaling	Transducer	GRF2	0.36028	0.135974	2.02706	5.58e-20
	BR signaling	Transducer	GRF4	-0.3383	0.000303125	0.326478	0.00024836
	BR signaling	Transducer	GRF6	-0.39967	3.45119e-06	0.145212	0.0926985
	BR signaling	Transducer	GRF8	-0.457426	2.86308e-05	-0.578666	1.3e-07
	BR signaling	Transducer	GRF10	0.443635	1.07588e-05	0.210919	0.0313258
	BR signaling	Transducer	BNQ2	2.64513	0.245246	0.434188	0.856852
	BR signaling	Transducer	AIF1	0	1	5.24769	0.0853096
	BR signaling	Transducer	AIF2	0.113044	0.542459	1.00031	1.14e-06
	BR signaling	Transducer	AIF3	1.73853	2.08983e-06	2.34224	1.34e-13
	BR signaling	Transducer	AIF4	-0.391458	0.000407238	-0.665858	1.02e-07
	BR signaling	Transducer	PUB40	-0.35949	0.685188	2.39345	0.000726201
	BR signaling	Marker	DWF4	0.763921	0.00927711	1.82985	4.75e-12
	BR signaling	Marker	EXP8	1.49458	0.000367938	4.07585	7.85e-28
	BR signaling	Marker	SAUR-AC1	-2.09279	0.752726	0	1
	BR homeostasis	Anabolism	CYP724A1	#N/A	#N/A	#N/A	#N/A
	BR homeostasis	Catabolism	BIA2	#N/A	#N/A	#N/A	#N/A
	BR homeostasis	Catabolism	UGT73C6	#N/A	#N/A	#N/A	#N/A
	BR homeostasis	Catabolism	ST4a	#N/A	#N/A	#N/A	#N/A
	BR signaling	Transducer	KIB2	#N/A	#N/A	#N/A	#N/A
	BR signaling	Transducer	KIB4	#N/A	#N/A	#N/A	#N/A
	BR signaling	Transducer	BNQ1	#N/A	#N/A	#N/A	#N/A
	BR signaling	Transducer	BNQ3	#N/A	#N/A	#N/A	#N/A

## Sheet: ET
				DS_dog1-2 V Col		IS_dog1-2 V Col			ET	No.
ET	H/S	Category	Name	Log2 FC	P_value	Log2 FC	P_value		detectable	74
	ETH homeostasis	Anabolism	MAT1	0.708254	0.00674291	0.374363	0.145258		Not detectable	6
	ETH homeostasis	Anabolism	MAT2	0.792061	2.20601e-07	0.289315	0.0552273		Repeat marker	3	ERF1	EBF2	ERS2
	ETH homeostasis	Anabolism	MAT3	0.697679	0.00557773	1.29327	1.89e-08		Total	77
	ETH homeostasis	Anabolism	MAT4	-0.0586595	0.760902	1.05588	2.53e-08
	ETH homeostasis	Anabolism	FER	-0.0114806	0.881713	-0.199395	0.00745507
	ETH homeostasis	Anabolism	ACS2	-0.216879	0.176872	-2.95233	6.66e-40
	ETH homeostasis	Anabolism	ACS4	-0.942455	0.416277	-3.79099	0.0174158
	ETH homeostasis	Anabolism	CK1.8	0.120289	0.105538	-0.0434545	0.538359
	ETH homeostasis	Anabolism	ETO1	0.095577	0.302202	-0.111596	0.233795
	ETH homeostasis	Anabolism	EOL1	-0.0152989	0.881533	0.249397	0.0120967
	ETH homeostasis	Anabolism	EOL2	2.73634	6.78476e-10	1.90675	3.52e-09
	ETH homeostasis	Anabolism	ACS6	0.226625	0.527344	0.825763	0.048628
	ETH homeostasis	Anabolism	ACS7	-1.57574	0.42401	4.78958	0.0259851
	ETH homeostasis	Anabolism	XBAT32	-0.594164	4.41447e-05	-0.414011	0.0028227
	ETH homeostasis	Anabolism	ACS8	0	1	0	1
	ETH homeostasis	Anabolism	LHT1	-1.16033	2.06824e-11	-1.12842	1.15e-10
	ETH homeostasis	Anabolism	ACO1	0.33609	0.237135	2.67951	2.63e-32
	ETH homeostasis	Anabolism	ACO2	-0.62775	0.0763106	0.38065	0.273037
	ETH homeostasis	Anabolism	ACO3	0.0330967	0.954281	1.45369	0.256688
	ETH homeostasis	Anabolism	ACO4	0.780168	0.277578	0.0877479	0.904606
	ETH homeostasis	Anabolism	ACO5	4.94624	0.451192	5.64522	0.389566
	ETH signaling	Receptor	ETR1	-0.492656	2.31022e-06	-0.470109	2.96e-06
	ETH signaling	Receptor	ETR2	0.356543	0.00394625	0.393521	8.25e-05
	ETH signaling	Receptor	ERS1	1.95788	2.26611e-11	2.02738	4.1e-23
	ETH signaling	Receptor	ERS2	0.586466	0.000309236	-0.717889	4.37e-05
	ETH signaling	Receptor	EIN4	0.0588382	0.616678	0.513877	1.62e-07
	ETH signaling	Transducer	CPR5	-0.162284	0.0255393	-0.540537	1.05e-12
	ETH signaling	Transducer	RTE1	-0.211289	0.219321	-0.369936	0.0315583
	ETH signaling	Transducer	CTR1	-0.493494	1.05622e-05	-0.399991	0.000335768
	ETH signaling	Transducer	EIN2	-0.187413	0.0127632	0.0616064	0.398759
	ETH signaling	Transducer	ETP1	0.287999	0.00233389	-0.244828	0.00922365
	ETH signaling	Transducer	ETP2	-0.00329069	0.982576	0.410898	0.00084601
	ETH signaling	Transducer	EIN3	-0.387976	2.61543e-05	-0.762987	1.72e-16
	ETH signaling	Transducer	EBF1	-0.195624	0.0361232	-0.299246	0.00127811
	ETH signaling	Transducer	EBF2	-0.513742	4.69219e-05	-0.844476	1.97e-11
	ETH signaling	Transducer	EIL1	-0.288883	0.000904532	0.422122	2.09e-06
	ETH signaling	Transducer	EIL2	0	1	3.02429	0.646315
	ETH signaling	Transducer	EIL3	-0.682042	1.66625e-09	-0.311702	0.00735621
	ETH signaling	Transducer	EIL4	1.93826	6.86932e-24	0.392384	0.0383264
	ETH signaling	Transducer	EIL5	-0.265497	0.0528495	0.581125	9.2e-05
	ETH signaling	Transducer	ERF1	0.854469	0.0680796	-1.38393	0.0112473
	ETH signaling	Transducer	ERF2	-0.0191264	0.921383	-1.46439	2.31e-13
	ETH signaling	Transducer	ERF3	0.504208	0.000109278	0.660407	5.14e-07
	ETH signaling	Transducer	ERF4	-1.16075	5.72562e-09	-0.0545792	0.781174
	ETH signaling	Transducer	ERF5	1.24986	0.00821719	1.1022	0.0319848
	ETH signaling	Transducer	ERF6	0.0871002	0.772859	-1.20237	0.000547211
	ETH signaling	Transducer	ERF7	0.0667754	0.494779	1.07458	1.62e-32
	ETH signaling	Transducer	ERF8	-0.543587	0.0947952	-0.673396	0.121256
	ETH signaling	Transducer	ERF9	2.88256	0.00105179	2.7091	5.12e-05
	ETH signaling	Transducer	ERF10	0.0629955	0.951728	-1.72772	0.243355
	ETH signaling	Transducer	ERF11	-0.526689	0.122911	-2.18786	2.72e-05
	ETH signaling	Transducer	ERF12	0.0741509	0.32374	-1.77147	9.1e-99
	ETH signaling	Transducer	ERF13	2.39763	0.0553802	1.42754	0.165919
	ETH signaling	Transducer	ERF15	-2.57502	0.125414	2.03055	0.091484
	ETH signaling	Transducer	ERF34	0.617461	0.883796	7.18402	0.0803418
	ETH signaling	Transducer	ERF35	2.74627	0.442771	2.5994	0.444659
	ETH signaling	Transducer	ERF38	0	1	1.26405	0.588805
	ETH signaling	Transducer	ERF39	1.58405	0.811245	5.58368	0.394955
	ETH signaling	Transducer	ERF53	0.979953	0.798917	0	1
	ETH signaling	Transducer	ERF54	2.16865	0.0153782	-1.03667	0.560052
	ETH signaling	Transducer	ERF56	0.140245	0.922518	0.45431	0.743711
	ETH signaling	Transducer	ERF57	0	1	1.70288	0.797544
	ETH signaling	Transducer	ERF60	-1.03923	3.13563e-05	-0.0628159	0.803045
	ETH signaling	Transducer	ERF61	-1.30607	0.527206	1.86318	0.20273
	ETH signaling	Transducer	ERF71	-0.742883	0.488595	2.91415	0.00197794
	ETH signaling	Transducer	ERF73	0.0641467	0.721945	0.475613	0.00432264
	ETH signaling	Transducer	ERF104	-0.968393	2.38827e-10	-1.65406	1.02e-34
	ETH signaling	Transducer	ERF106	2.03784	0.00985826	3.02581	1.21e-12
	ETH signaling	Transducer	ERF114	-0.296895	0.868022	0.450034	0.685905
	ETH signaling	Transducer	ERF115	0	1	-0.75062	0.662919
	ETH signaling	Marker	EBP	-0.168336	0.181343	-0.212488	0.0917273
	ETH signaling	Marker	ERF1	0.854469	0.0680796	-1.38393	0.0112473
	ETH signaling	Marker	EBF2	-0.513742	4.69219e-05	-0.844476	1.97e-11
	ETH signaling	Marker	ERS2	0.586466	0.000309236	-0.717889	4.37e-05
	ETH homeostasis	Anabolism	ACS5	#N/A	#N/A	#N/A	#N/A
	ETH homeostasis	Anabolism	ACS9	#N/A	#N/A	#N/A	#N/A
	ETH homeostasis	Anabolism	ACS11	#N/A	#N/A	#N/A	#N/A
	ETH signaling	Transducer	ERF14	#N/A	#N/A	#N/A	#N/A
	ETH signaling	Transducer	ERF96	#N/A	#N/A	#N/A	#N/A
	ETH signaling	Transducer	ERF105	#N/A	#N/A	#N/A	#N/A

## Sheet: SL
				DS_dog1-2 V Col		IS_dog1-2 V Col			SL	No.
SL	H/S	Category	Name	Log2 FC	P_value	Log2 FC	P_value		detectable	11
	SL homeostasis	Anabolism	MAX3	-0.783947	0.00217349	-3.55264	1.16e-19		Not detectable	2
	SL homeostasis	Anabolism	MAX4	2.89153	0.231201	3.01934	0.219617		Repeat marker	0
	SL homeostasis	Anabolism	MAX1	-0.489622	0.630537	0.268392	0.788542		Total	13
	SL homeostasis	Anabolism	LBO1	-0.0886763	0.955274	4.18888	0.0055264
	SL homeostasis	Catabolism	CXE15	1.02405	9.71426e-12	-1.17817	6e-12
	SL homeostasis	Transport	PDR1	0.494044	0.577891	1.18189	0.160612
	SL signaling	Receptor	D14	-2.09041	0.0818957	1.84689	0.0466907
	SL signaling	Transducer	MAX2	-0.110052	0.375831	-0.341657	0.00961059
	SL signaling	Transducer	SMXL6	0.745006	2.57681e-05	-0.491762	0.00165231
	SL signaling	Transducer	SMXL7	0.275537	0.214366	1.00651	5.95e-09
	SL signaling	Transducer	SMXL8	0	1	3.52443	0.592278
	SL signaling	Transducer	BRC1	#N/A	#N/A	#N/A	#N/A
	SL signaling	Transducer	BRC2	#N/A	#N/A	#N/A	#N/A

## Sheet: CK
				DS_dog1-2 V Col		IS_dog1-2 V Col			SL	No.
CK	H/S	Category	Name	Log2 FC	P_value	Log2 FC	P_value		detectable	73
	CK homeostasis	Anabolism	IPT1	-2.42371	2.79795e-16	-2.19857	3.48e-16		Not detectable	15
	CK homeostasis	Anabolism	IPT2	-0.0405047	0.798276	-0.175269	0.265883		Repeat marker	2	ARR4	ARR5
	CK homeostasis	Anabolism	IPT4	2.11866	0.630769	-0.744976	0.864743		Total	86
	CK homeostasis	Anabolism	IPT5	0	1	3.70222	0.573587
	CK homeostasis	Anabolism	IPT6	0	1	-3.0145	0.620901
	CK homeostasis	Anabolism	IPT8	1.42212	0.830454	0	1
	CK homeostasis	Anabolism	IPT9	0.127216	0.256807	0.214744	0.0272676
	CK homeostasis	Anabolism	CYP735A1	-2.09287	0.752718	0	1
	CK homeostasis	Anabolism	CYP735A2	0	1	1.70288	0.797544
	CK homeostasis	Anabolism	LOG1	4.15961	0.0618303	4.49327	0.0236936
	CK homeostasis	Anabolism	LOG3	2.5731	0.696446	3.06974	0.637294
	CK homeostasis	Anabolism	LOG4	1.08157	0.00946908	1.2345	0.000865043
	CK homeostasis	Anabolism	LOG5	1.50543	0.755421	3.02465	0.525838
	CK homeostasis	Anabolism	LOG7	0.0325243	0.972469	0.86942	0.267036
	CK homeostasis	Anabolism	LOG8	-0.495486	0.137763	1.33748	1.24e-08
	CK homeostasis	Anabolism	STM	-0.14785	0.686874	0.428487	0.13019
	CK homeostasis	Catabolism	CKX1	-0.234846	0.546231	-2.05524	2.91e-07
	CK homeostasis	Catabolism	CKX2	-4.05839	0.537358	0	1
	CK homeostasis	Catabolism	CKX3	-1.04008	0.000923734	-1.32471	2.2e-05
	CK homeostasis	Catabolism	CKX4	0	1	1.70288	0.797544
	CK homeostasis	Catabolism	CKX5	0.353887	0.246583	1.91054	4.17e-11
	CK homeostasis	Catabolism	CKX7	3.17283	2.4363e-06	3.6636	8.46e-09
	CK homeostasis	Catabolism	UGT76C2	-0.0546123	0.769647	-0.183502	0.330209
	CK homeostasis	Transport	PUP1	-0.156399	0.515785	1.06771	3.4e-07
	CK homeostasis	Transport	PUP2	1.58432	0.811213	0	1
	CK homeostasis	Transport	PUP3	0.0975356	0.91928	-3.57876	0.0183741
	CK homeostasis	Transport	PUP4	-2.10394	0.0492752	0.663124	0.579121
	CK homeostasis	Transport	PUP5	-0.206326	0.48223	-0.180822	0.400916
	CK homeostasis	Transport	PUP6	1.51251	0.298854	-1.10049	0.60465
	CK homeostasis	Transport	PUP7	-0.426887	0.112225	-2.20982	1.11e-15
	CK homeostasis	Transport	PUP8	-0.228276	0.413788	-2.38366	2.84e-11
	CK homeostasis	Transport	PUP10	-0.249628	0.0703596	-0.823914	7.29e-09
	CK homeostasis	Transport	PUP11	0.0375589	0.743952	0.411172	3.5e-05
	CK homeostasis	Transport	PUP12	-0.262451	0.792166	-0.804673	0.401492
	CK homeostasis	Transport	PUP13	0.531483	0.0144389	0.0302121	0.858343
	CK homeostasis	Transport	PUP14	-0.286819	0.0191943	-0.756004	4.33e-09
	CK homeostasis	Transport	PUP15	1.42214	0.830451	0	1
	CK homeostasis	Transport	PUP18	0.585309	0.349364	-0.304537	0.632667
	CK homeostasis	Transport	PUP19	-3.0898	0.639701	3.70222	0.573587
	CK homeostasis	Transport	ABCG14	-0.262668	0.0784859	-0.796627	4.56e-08
	CK signaling	Receptor	AHK1	0.586736	0.00246048	0.411786	0.0250446
	CK signaling	Receptor	AHK2	0.789113	0.0145303	0.441329	0.0813968
	CK signaling	Receptor	AHK3	0.162386	0.0912971	-0.336937	0.000526189
	CK signaling	Receptor	AHK4	0.0562044	0.622645	-0.638359	7.72e-10
	CK signaling	Receptor	AHK5	-0.639395	0.00258294	0.0308623	0.903011
	CK signaling	Transducer	AHP1	0.550415	0.803705	5.24936	0.023535
	CK signaling	Transducer	AHP2	2.19946	1.92418e-16	1.88284	6.3e-24
	CK signaling	Transducer	AHP3	0.368231	0.0211976	0.986237	2.97e-11
	CK signaling	Transducer	AHP4	3.11983	0.635589	0	1
	CK signaling	Transducer	AHP5	0.141385	0.173935	-0.421932	0.000231083
	CK signaling	Transducer	AHP6	3.47963	0.261135	4.44233	0.121068
	CK signaling	Transducer	ARR1	-0.117151	0.0839029	-0.340499	1.5e-06
	CK signaling	Transducer	ARR2	-0.175358	0.0570671	-0.274757	0.00265437
	CK signaling	Transducer	ARR3	0	1	5.39817	0.4109
	CK signaling	Transducer	ARR4	-0.488561	0.250039	1.62402	4.31e-05
	CK signaling	Transducer	ARR5	-2.30742	0.727864	3.89674	0.553466
	CK signaling	Transducer	ARR6	2.11329	0.174598	2.70424	0.171673
	CK signaling	Transducer	ARR7	0.343333	0.902681	3.19756	0.248378
	CK signaling	Transducer	ARR8	0.918403	3.19158e-05	0.703743	0.000127697
	CK signaling	Transducer	ARR9	0.141314	0.73088	-0.459876	0.31181
	CK signaling	Transducer	ARR10	0.212132	0.199698	0.377747	0.0155165
	CK signaling	Transducer	ARR11	1.56124	0.213381	-0.138691	0.94555
	CK signaling	Transducer	ARR12	0.0341341	0.746273	0.248482	0.0221568
	CK signaling	Transducer	ARR14	-0.110035	0.786359	0.258809	0.570889
	CK signaling	Transducer	ARR15	-0.0232591	0.971629	0.0925353	0.886598
	CK signaling	Transducer	ARR16	-0.431525	0.723568	1.84524	0.177461
	CK signaling	Transducer	ARR18	1.11743	0.120048	1.35214	0.145269
	CK signaling	Transducer	ARR21	-2.24861	0.490748	1.17624	0.694641
	CK signaling	Transducer	ARR22	0	1	0	1
	CK signaling	Transducer	ARR23	0	1	0	1
	CK signaling	Transducer	WUS	-1.10257	0.494877	-0.120841	0.943473
	CK signaling	Marker	ARR5	-2.30742	0.727864	3.89674	0.553466
	CK signaling	Marker	ARR4	-0.488561	0.250039	1.62402	4.31e-05
	CK homeostasis	Anabolism	IPT3	#N/A	#N/A	#N/A	#N/A
	CK homeostasis	Anabolism	IPT7	#N/A	#N/A	#N/A	#N/A
	CK homeostasis	Anabolism	LOG2	#N/A	#N/A	#N/A	#N/A
	CK homeostasis	Anabolism	LOG6	#N/A	#N/A	#N/A	#N/A
	CK homeostasis	Anabolism	LOG9	#N/A	#N/A	#N/A	#N/A
	CK homeostasis	Catabolism	CKX6	#N/A	#N/A	#N/A	#N/A
	CK homeostasis	Transport	PUP9	#N/A	#N/A	#N/A	#N/A
	CK homeostasis	Transport	PUP16	#N/A	#N/A	#N/A	#N/A
	CK homeostasis	Transport	PUP17	#N/A	#N/A	#N/A	#N/A
	CK homeostasis	Transport	PUP20	#N/A	#N/A	#N/A	#N/A
	CK signaling	Transducer	ARR13	#N/A	#N/A	#N/A	#N/A
	CK signaling	Transducer	ARR17	#N/A	#N/A	#N/A	#N/A
	CK signaling	Transducer	ARR19	#N/A	#N/A	#N/A	#N/A
	CK signaling	Transducer	ARR20	#N/A	#N/A	#N/A	#N/A
	CK signaling	Transducer	ARR24	#N/A	#N/A	#N/A	#N/A

## Sheet: Summary
		Total	Detetable
	ABA	114	110
	IAA	138	132
	JA	47	44
	SA	29	27
	GA	63	57
	BR	69	61
	ET	77	71
	SL	13	11
	CK	86	71
		636	584
