# Supplementary material for: DELAY OF GERMINATION 1, the Master Regulator of Seed Dormancy, Integrates the Regulatory Network of Phytohormones at the Transcriptional Level to Control Seed Dormancy
Source: Curr Issues Mol Biol. 2022 Dec 8;44(12):6205–17. doi: 10.3390/cimb44120423 (PMC9777134; doi:10.3390/cimb44120423)
Supplement: Supplementary file 1 [file cimb-44-00423-s001.zip › Table S3. Primers used for RT-qPCR.xls]

## Sheet: Sheet1
Primers used for RT-qPCR
Name	Sequence (5'-3')	Gene ID
GASA6-qRT-F	AAGTTATGGACCAGGAAGTCTG	AT1G74670
GASA6-qRT-R	CATTTAGCACAACACTTTTGGC
GASA4-qRT-F	GTTATGGCCTCAAGTGGATCTA	AT5G15230
GASA4-qRT-R	CATTTGTTGCAGAACGTAATGC
SAUR7-qRT-F	TCTTTTCAAGCTCTGCTGAGTA	AT2G21200
SAUR7-qRT-R	AGCGACAAAAGTATCTTCAGGA	AT2G21200
SAUR36-qRT-F	GTTGATCATAAGAAAGCCGACC	AT2G45210
SAUR36-qRT-R	GTGGCAAAATCCGTACTCTTTT	AT2G45210
EBP-qRT-F	ACCAACCAAGTTAACGTGAAAG	AT3G16770
EBP-qRT-R	ACTCTAACACCTTTTCGTGGAT	AT3G16770
ERF1-qRT-F	TTTCTCTACGGTCTAATCGAGC	AT3G23240
ERF1-qRT-R	TGACTTTCTTGAGCTTACGGAT	AT3G23240
EBF2-qRT-F	GGTTTGAGAGTAAGGTGACTGA	AT5G25350
EBF2-qRT-R	CAAACCCAAATCACTAACAGCA	AT5G25350
ERS2-qRT-F	AAGGCTAAGGTTCGTGAGTTTA	AT1G04310
ERS2-qRT-R	GTCGATCAAGAGACGTCCTAAT	AT1G04310
DWF4-qRT-F	GTTATCTTAAACCGTACACCGC	AT3G50660
DWF4-qRT-R	GGTTCTCCAAACAAGTTCGATC	AT3G50660
ARR4-qRT-F	GGTGGTGTTTCTTGTTTACGAA	AT1G10470
ARR4-qRT-R	ACAATACGATCAACGAGACTGT	AT1G10470
JAZ10-qRT-F	TCAGTTTTCCAAGTGTCTCGTA	AT5G13220
JAZ10-qRT-R	TACCGAAAGATCTGTCTCCATC	AT5G13220
PR1-qRT-F	TGGTCACTACACTCAAGTTGTT	AT2G14610
PR1-qRT-R	GCTTCTCGTTCACATAATTCCC	AT2G14610
RD26-qRT-F	TGTTTCACATTTGTAGGGGAGT	AT4G27410
RD26-qRT-R	ATTTCCGATCTCTTGGGCTAAA	AT4G27410
RD29B-qRT-F	GGCGGGCAAAGCGAG	AT5G52300
RD29B-qRT-R	TGCCCGTAAGCAGTAACAGATC	AT5G52300
RD29A-qRT-F	ACGTTTGCTCCAAGTGGTGA	AT5G52310
RD29A-qRT-R	CCTCCAACGTTATCGGGGTC	AT5G52310
ACTIN 8-qRT-F	GCACTTTCCAGCAGATGTGGAT	AT1G49240
ACTIN 8-qRT-R	GATCCCGTCATGGAAACGATGT	AT1G49240
RAB18-qRT-F	TGGCCAAGGGTACGGATCAG	AT5G66400
RAB18-qRT-R	CCCAAGCCACCACCACTTTC	AT5G66400
EXPA2-qRT-F	TCAACTTCTGCTTGTACTCCAT	AT5G05290
EXPA2-qRT-R	ATAGCCTTGGCTGTGTAAGTTA	AT5G05290
EXP8-qRT-F	GATAATGGAGGTTGGTGCAATC	AT2G40610
EXP8-qRT-R	TTGAAGTATGAGTGTCCGTTGA	AT2G40610
